# Supplementary material for: An application of topological data analysis in predicting sumoylation sites
Source: PeerJ. 2023 Oct 12;11:e16204. doi: 10.7717/peerj.16204 (PMC10576966; doi:10.7717/peerj.16204)
Supplement: Supplemental Information 2 [file peerj-11-16204-s002.xlsx]

## Sheet: Sheet1
Predictors	Sp	Sn	Acc	MCC	AUC
SVC_5-fold	0.9629 (± 0.0122)	0.8016 (± 0.0216)	0.8819 (± 0.0086)	0.7744 (± 0.0142)	0.9506 (± 0.0104)
SVC_10-fold	0.9679 (± 0.0209)	0.8049 (± 0.0437)	0.8865 (± 0.0280)	0.7823 (± 0.0535)	0.9526 (± 0.0160)
RFC_5-fold	0.9668 (± 0.0169)	0.8880(± 0.0213)	0.9271 (± 0.0212)	0.8564 (± 0.0408)	0.9730 (± 0.0060)
RFC_10-fold	0.9730 (± 0.0191)	0.8836 (± 0.0362)	0.9277 (± 0.0241)	0.8592 (± 0.0466)	0.9745 (± 0.0113)
GBC_5-fold	0.9627 (± 0.0070)	0.9226 (± 0.0172)	0.9426 (± 0.0075)	0.8859 (± 0.0148)	0.9852 (± 0.0052)
GBC_10-fold	0.9641 (± 0.0229)	0.9286(± 0.0323)	0.9458 (± 0.0229)	0.8920 (± 0.0451)	0.9852 (± 0.0075)
