# Supplementary material for: An application of topological data analysis in predicting sumoylation sites
Source: PeerJ. 2023 Oct 12;11:e16204. doi: 10.7717/peerj.16204 (PMC10576966; doi:10.7717/peerj.16204)
Supplement: Supplemental Information 3 [file peerj-11-16204-s003.xlsx]

## Sheet: Sheet1
Predictors	Sp	Sn	Acc	MCC	AUC
SVC_5-fold	0.9164 (± 0.0091 )	0.7644 (± 0.0099)	0.8403 (± 0.0058)	0.6888 (± 0.0113)	0.9040 (± 0.0044)
SVC_10-fold	0.9164 (± 0.0157 )	0.7654 (± 0.0268)	0.8409 (± 0.0173)	0.6897 (± 0.0338)	0.9044 (± 0.0116)
RFC_5-fold	0.8932 (± 0.0096 )	0.7934 (± 0.0111)	0.8432(± 0.0057)	0.6900 (± 0.0108)	0.9188 (± 0.0048)
RFC_10-fold	0.8944 (± 0.0188 )	0.7968 (± 0.0229)	0.8455 (± 0.0166)	0.6946 (± 0.0331)	0.9202 (± 0.0115)
GBC_5-fold	0.9072 (± 0.0072 )	0.8397 (± 0.0108)	0.8735 (± 0.0043)	0.7487 (± 0.0081)	0.9425 (± 0.0045)
GBC_10-fold	0.9080 (± 0.0128 )	0.8421 (± 0.0170)	0.8750 (± 0.0131)	0.7517 (± 0.0262)	0.9442 (± 0.0064)
