# Supplementary material for: An application of topological data analysis in predicting sumoylation sites
Source: PeerJ. 2023 Oct 12;11:e16204. doi: 10.7717/peerj.16204 (PMC10576966; doi:10.7717/peerj.16204)
Supplement: Supplemental Information 4 [file peerj-11-16204-s004.xlsx]

## Sheet: Supplemental Data S1
	0	1	2	3	4	5	6	7	8	9	10	11	12	13	14
B7ZR65	61	253	365
H2L0N8	239	331
O00180	274
O00232	92
O00257	494
O00327	259
O00422	13
O00429	38	532	535	558	568	594	597	606	608
O00482	173
O00541	517
O13351	14	30
O14503	159	279
O15169	857	860
O15265	257
O15446	270
O15525	14
O35426-2	276	297
O35615	469	507
O42934	198
O43290	94	141
O43795	287
O60016	109	160
O60216	216	317	319	321	323	330	335	358	359	364	371	387	403	406	418
O60315	391	866
O60479	112
O60566	250
O60885	1111
O60907	560
O70126	207
O70343	183
O74261	324
O75030	289	423
O75396	81
O75444	29	33	331
O75475	75	250	254	364
O75533	413
O75626	816
O75643	944	971	1071	1199	2091
O80982	167	315
O95365	61
O95600	67
O95644	349	702	914
O95785	1523
P00441	76
P00445	19
P01100	265
P02340	383
P02545	201	378	420	486
P03069	50	58
P03372	266	268
P03871	305
P04050	1487
P04150	277	293	703
P04456	61
P04637	386
P04786	65	91
P05067-4	587	595
P05455	41
P05549	10
P05627	229	257
P05750	212
P05783	207	372
P05787	285	364
P06400	720
P06401	7	388	531
P06730	36	49	162	206	212
P06748	230	263
P06778	10	11	126	200	220
P06786	1220	1246	1277
P07910	8	50	89	176	223	229	232	243	250
P08047	16
P08069	1055	1130	1150
P08151	180	815
P08235	89	399	428	494	953
P08758	29
P09450	237	267	301
P09874	203	486
P10071	87	462	696	779	1422
P10242	503	527
P10275	388	521
P10276	166	171	399
P10636	657
P10914	275	299
P10989	68	284
P11387	103	117	153	328	436
P11388	1228	1240
P11474	14	403
P11627	1147	1172
P11831	147
P11978	1128
P12004	164	254
P12757	50	383
P12954	1081	1089	1142
P12956	556
P13647	178
P13693	164
P14316	137	166	293
P15330-2	382
P15387	474
P15408	222
P15806	496
P15873	127	164
P15976	137
P16104	10
P16220	271	290
P16371-2	167	177	272	279
P16649	270
P17302	144	237
P17544	107
P17655	390
P17676	174
P17844	53
P18031	335	347
P18412	54
P18846	215	234
P19419	230	249	254
P19544	73	177
P19793	108
P20153	20
P20193	839
P20263	118
P20941	33
P21333	299
P21538	807
P22336	133	170	427
P22460	221	536
P23204	358
P23396	18	214	230
P23497	297
P23611	310
P23759	85
P23769	222	389
P24385	33
P25490	288
P25963	21
P26447	22	96
P26754	199
P26755	46
P27540	245
P27577	15	227
P27694	449	577
P27782	25	267
P27815	358
P27816	838
P27824	525
P28324	167
P28360	15	133
P29373	102
P29374	418	444
P29590	65	160	490	497
P31596	570
P31749	276
P32182	6
P32333	101	109
P32457	4	11	30	63	287	443	465
P32458	412
P32468	358
P32504	556	651	779
P32526	301	333	381	529
P32797	909
P32944	594
P33244-2	418
P34896	38
P35187	621	831
P35226	88
P35398	240
P35520	211
P35712	404	417
P35869	63	510
P36049	36	61
P36508	411
P36956	123	418
P37231	63	107	395
P37840	96	102
P38398	109	119
P38438	277
P38904	981	1154
P39748	168
P40075	180
P40337	171
P40381	103
P40460	231
P41161	89	263	293	350
P41212	11	99
P41235	365
P41970	162
P42224	703
P42229	696	700
P42260	886
P42575	77
P43004	571
P43268	96	226	260	322
P43351	411	414
P43354	91	577
P43694	365
P45973	32	69	71	84	104	106
P46060	8	524
P46099	56
P47743	882
P48432	247
P48437	232	326	353	556
P48552	170	756	1154
P49138	339
P49711	74	689
P49715	161
P49716	120
P49750	983	1053	1596
P49756	578
P49790	353
P49841	292
P50552	286
P50623	153	157
P51692	701	705
P51858	80	96
P52272	17	698
P52565	138
P52739-2	567
P52926	66
P52952	52
P53067	909
P54132	317	331	344	347
P54253	16	194	609	745
P54274	337	338	349	350	351	352
P54845	20	24
P55055	31	409	447
P55265	418
P55852	23	42
P56524	559
P56539	38
P56817	275
P57682	10	198
P58012	25	114	150
P60484	254	266	289
P60709	113
P61086	14
P61289	6	12	14
P61956	5	11	42
P62316	8
P62508	40
P62805	13
P62987	11
P63000	183	184	186	188
P63015	91
P63165	7	25
P63279	153
P68431	24
P70434	406
P70671	152
P78347	221	240	456	991
P82970	101
Q00288	309
Q00613	298
Q00653	90	298	689	863
Q01543	67
Q01826	744
Q02078	403
Q02080-2	319
Q02447	120	551
Q02591	183	196	203	209	214	238
Q02750	104
Q03188	534	721	746
Q03330	25
Q03933	82	139
Q04110	5	101
Q04322	498
Q05024	201	215
Q05193	376
Q05397	152
Q05516	242	387	396
Q06413	391
Q07657	426	437
Q07666	96	102
Q07869	185
Q07979	322	328
Q08211	76	120
Q08499-6	323
Q09472	1020	1024
Q0VGT2	630	716
Q12158	165	290	460
Q12216	438	446
Q12223	207	228	238
Q12692	126	133
Q12772	464
Q12948	227	256
Q13002	886
Q13129	839	1599
Q13164	6	22
Q13263	554	575	676	750	779	804
Q13285	119	194
Q13330	509
Q13363	428
Q13422	58	241
Q13426	210
Q13428	755
Q13485	113	159
Q13506	480
Q13547	444	476
Q13569	330
Q13887	162	209
Q14151	225	230	293	391	517	524
Q14164	231
Q14191	496
Q14526	333
Q14676	1840
Q14831	889
Q14980	1766
Q15022	72	75
Q15054	258	444
Q15326	407
Q15542	14
Q15554	287
Q15596	239	731	788
Q15744	121
Q15788	732	774
Q16204	74	266	424
Q16514	19
Q16621	368
Q16665	391	477
Q16666	561
Q16849	754
Q19691	231	400
Q24151	187
Q2QGD7	660
Q2TB10	409
Q38953	505
Q3U1U7	542	583	660
Q42547	423
Q42551	154
Q49A26	269
Q4DIR8	23
Q4LE39	429	440
Q505F1	238
Q55CL6	105
Q5SVZ6	25
Q5VZL5	250	273
Q60591	684	897
Q60793	275
Q60864	123	210	312	395	486
Q60974	152	260	1117	1330
Q61183	444	445	506	507	730	734
Q61624	115	356
Q62915	679
Q63120	949
Q64127	724	742
Q680Q4	100	479	488
Q6DJT9	244	263
Q6EEV6	11
Q6NZI2	161
Q75MX6	495
Q7KPL1	112	159	222
Q7LC44	110	268
Q7T246	123	187	233
Q86B87	160	423
Q86U86	1293
Q86YP4	30	487
Q8IX12	1012
Q8IXT5	151
Q8IYA6	198
Q8IZL8	826
Q8IZQ8	571
Q8K400	766
Q8N2W9	35	128
Q8N3X1	348
Q8N4C6	1641	1680
Q8N680	505
Q8NAP3	43
Q8ND82	75	273
Q8NEB9	840
Q8NHM5	890
Q8TAD8	30
Q8TEQ6	754
Q8W234	200
Q8WXI9	33
Q91ZP3	599	629
Q92317	141
Q92585	217	299
Q92731	4
Q92766	615
Q92793	998	1033	1056
Q92797	361	483
Q92844	282
Q92985	444	446	452
Q92993	430	451
Q940Y3	447
Q94KE2	402
Q969V6	499	576	624
Q96B97	598
Q96C00	286
Q96EB6	734
Q96EP1	663
Q96FA3	202	266	295	297	303
Q96FV9	595
Q96GD4	202
Q96QD9	140
Q96RT1	506
Q96T23	254	277	278	294	309	419	456
Q99497	130
Q99607	657
Q99683	535	1083	1114
Q99814	394
Q99856	398
Q99958	214	227
Q99PV8	679	877
Q9BUJ2	117
Q9BYV9	202	276	421	580
Q9BZK7	497
Q9C598	2
Q9CAE3	287	693	770
Q9FNB4	320
Q9H063	35
Q9H2G2	487
Q9H2X6	32	1191
Q9H307	304
Q9H3D4	588	676
Q9HAZ2	752
Q9JIX5	609
Q9JLQ4	237	424
Q9LSE2	393
Q9M0K4	258
Q9M7Q7	13	14	20	217	240	254
Q9N658	509
Q9N6D8	26	302
Q9NP62	156
Q9NS56	560
Q9NSC2	1086
Q9NUW8	111	139
Q9NX24	5
Q9NYF8	831
Q9NZN4	315
Q9P1Z2	29
Q9QXZ7	178	315	322
Q9QYE3	634
Q9SBG3	283
Q9SJN0	391
Q9U1H5	438
Q9UBD0	215
Q9UBG0	1142
Q9UBT2	190	236	257	271	275	540
Q9UBW7	963
Q9UER7	630	631
Q9UG01	4
Q9UGC6	121
Q9UHF7	1192	1201
Q9UHP3	99
Q9UIS9	499	538
Q9UJX5	772	798
Q9UKF6	462	465	545
Q9UKL0	297
Q9UKL3	1813
Q9UKV3	532
Q9ULJ3	40
Q9ULU4	645
Q9UPG8	250	269
Q9UPN6	18
Q9UPW6	233	350
Q9UQ80	93	298
Q9UQR1	115	356
Q9VEZ5	186
Q9Y230	456
Q9Y265	225
Q9Y2K1	328
Q9Y2W7	26	90
Q9Y2X3	467	497
Q9Y458	63
Q9Y4E5	706
Q9Y4K3	124	142	453
Q9Y5Q3	32	297
Q9Y6K9	277	309
Q9Y6Q9	723	786	1194
Q9Z104	31	125	156	157
Q9ZQ70	508
