# Supplementary material for: An application of topological data analysis in predicting sumoylation sites
Source: PeerJ. 2023 Oct 12;11:e16204. doi: 10.7717/peerj.16204 (PMC10576966; doi:10.7717/peerj.16204)
Supplement: Supplemental Information 5 [file peerj-11-16204-s005.xlsx]

## Sheet: Sheet1
ue_pos	seq
A0AUZ9_134	YNGSNIQLSKICLSHSEEFIKKEPLSDTTSQCMKDVQIILD
A2AJT9_400	RKESNSSSNQLDKSQKLPDVKPSPINLRKKSLTVKVDVKKT
A6NFI3_829	GRRFGQSAALTRHQWAHAEEKPHRCPDCGKGFGHSSDFKRH
A6NFI3_955	KTHRGATAAPGSGSAPAPAPKPEAAAKGPSSAGPGERGSAL
A6NHJ4_220	KIHISNNYENNFFHSSLLTLKQEVHIREKSFQCNESGKAFN
A6NHR9_1374	GPIIKLMILPDPEKPVRLNVKYDKDASFLAGGLFTDFMISV
A6NHR9_1496	SEQVIVEVLPNQPVKLVPKIKPPTPAVSNVRSVASRTLVRD
A7XYQ1_677	TVGHRARLHNVIHRALHAHVKAEREPSAAERRTCGGCRDGH
A8MV65_126	FSRALGQAITLHPESAISKSKMGLTPLWRDSSALSSQRNSF
A8MV65_62	QKKLAVFSKMQDSLEVTLPSKQEEEDEEEEEEEKDQPAEME
A8MW92_530	NPSSKAIADGRGAPAAAGISKTEKKVKLEDKSSTAFGKRKE
A8MW92_75	DEWIYWDSNRLRPLERPALRKEGLKDEEDFFDFKAGEEVLA
A8MW92_79	YWDSNRLRPLERPALRKEGLKDEEDFFDFKAGEEVLARWTD
A8MW92_851	VNREEKKYVQNHKEPPRLPLKMEGTYITSEHSYQKPQSFGQ
A9YTQ3_577	VWLGASDRSHPATFPTRMHLKTEPDSRQQVYISHLGHGVRG
A9YTQ3_660	ARGRGEQSCTCRAAEAAPVVKREPLDSPQWATHSQGMVPGM
B7Z6K7_335	QRVHTGKRPYECGECGKSFSKYASFSNHQRVHTEKKHYECG
B7Z6K7_391	QRVHTGKRPYECGECGKSFSKYASFSNHQRVHTDKKHYECG
C9JLR9_375	RDSASAAGAPSSQDLSPPDVKEEAGWVPERPGPAEEEEELE
E9PAV3_2005	VFGEAKIEDLSQQAQLAAAEKFKVQGEAVSNIQENTQTPTV
O00148_154	RFSKYMPSVKVSVFFGGLSIKKDEEVLKKNCPHVVVGTPGR
O00148_162	VKVSVFFGGLSIKKDEEVLKKNCPHVVVGTPGRILALVRNR
O00148_240	EKQCMMFSATLSKDIRPVCRKFMQDPMEVFVDDETKLTLHG
O00148_255	RPVCRKFMQDPMEVFVDDETKLTLHGLQQYYVKLKDSEKNR
O00148_31	LDYDEEEEPQAPQESTPAPPKKDIKGSYVSIHSSGFRDFLL
O00148_35	EEEEPQAPQESTPAPPKKDIKGSYVSIHSSGFRDFLLKPEL
O00193_13	XXXXXXXXMSAARESHPHGVKRSASPDDDLGSSNWEAADLG
O00193_62	LRLMGAGKKEHTGRLVIGDHKSTSHFRTGEEDKKINEELES
O00193_75	RLVIGDHKSTSHFRTGEEDKKINEELESQYQQSMDSKLSGR
O00231_274	MLLCKIMLNTPEDVQALVSGKLALRYAGRQTEALKCVAQAS
O00232_92	KMCYEAKEWDLLNENIMLLSKRRSQLKQAVAKMVQQCCTYV
O00257_106	FARRSNVLTGLQDSSTDNRAKLDLGAQGKGQGHQYELNSKK
O00257_114	TGLQDSSTDNRAKLDLGAQGKGQGHQYELNSKKHHQYQPHS
O00257_125	AKLDLGAQGKGQGHQYELNSKKHHQYQPHSKERAGKPPPPG
O00257_149	QYQPHSKERAGKPPPPGKSGKYYYQLNSKKHHPYQPDPKMY
O00257_157	RAGKPPPPGKSGKYYYQLNSKKHHPYQPDPKMYDLQYQGGH
O00257_167	SGKYYYQLNSKKHHPYQPDPKMYDLQYQGGHKEAPSPTCPD
O00257_178	KHHPYQPDPKMYDLQYQGGHKEAPSPTCPDLGAKSHPPDKW
O00257_191	LQYQGGHKEAPSPTCPDLGAKSHPPDKWAQGAGAKGYLGAV
O00257_205	CPDLGAKSHPPDKWAQGAGAKGYLGAVKPLAGAAGAPGKGS
O00257_212	SHPPDKWAQGAGAKGYLGAVKPLAGAAGAPGKGSEKGPPNG
O00257_223	GAKGYLGAVKPLAGAAGAPGKGSEKGPPNGMMPAPKEAVTG
O00257_249	PPNGMMPAPKEAVTGNGIGGKMKIVKNKNKNGRIVIVMSKY
O00257_268	GKMKIVKNKNKNGRIVIVMSKYMENGMQAVKIKSGEVAEGE
O00257_278	KNGRIVIVMSKYMENGMQAVKIKSGEVAEGEARSPSHKKRA
O00257_280	GRIVIVMSKYMENGMQAVKIKSGEVAEGEARSPSHKKRAAD
O00257_320	DERHPPADRTFKKAAGAEEKKVEAPPKRREEEVSGVSDPQP
O00257_352	VSGVSDPQPQDAGSRKLSPTKEAFGEQPLQLTTKPDLLAWD
O00257_365	SRKLSPTKEAFGEQPLQLTTKPDLLAWDPARNTHPPSHHPH
O00257_494	DLRCVKTRSEAGEPPSSLQVKPETPASAAVAVAAAAAPTTT
O00257_77	FQNRERQEQLMGYRKRGPKPKPLVVQVPTFARRSNVLTGLQ
O00267_1037	KDSEKVVSISSEHLEPITPTKNNKVKVILGEDREATGVLLS
O00267_143	RRLQNLWRDQREEELGEYYMKKYAKSSVGETVYGGSDELSD
O00287_198	KSDQALNCGGTASTGSAGNVKLEESADNILSIVKQRTGSFG
O00311_268	QQSTTKASVKRPYTNAQIQIKQGKDGKEGSVGLSVQRSVFG
O00422_13	XXXXXXXXMAVESRVTQEEIKKEPEKPIDREKTCPLLLRVF
O00425_450	QLSRFAGASIKIAPAEAPDAKVRMVIITGPPEAQFKAQGRI
O00425_475	IITGPPEAQFKAQGRIYGKIKEENFVSPKEEVKLEAHIRVP
O00541_517	AALEEQRMEGKKPRVMAGTLKLEDKQRLAQEEESEAKRLAI
O00566_350	RVTFALPDDAETEDTGVLNVKKNSDEVKSSFEKRQEKMNEK
O00566_382	KRQEKMNEKIASLEKELLEKKPWQLQGEVTAQKRPENSLLE
O00566_394	LEKELLEKKPWQLQGEVTAQKRPENSLLEETLHFDHAVRMA
O00566_555	MEEVAPVSVSDAALLAPEEIKEKNKAGDIKTAAEKTATDKK
O00566_632	KTVASEKLKQLTKTGKASFIKDEGKDKALKSSQAFFSKLQD
O00566_649	SFIKDEGKDKALKSSQAFFSKLQDQVKMQINDAKKTEKKKK
O00567_230	YCRLAQFIGNRRELNEDKLEKLEELTMDGAKAKAILDASRS
O00567_240	RRELNEDKLEKLEELTMDGAKAKAILDASRSSMGMDISAID
O00567_540	SDLEETAGSTSIPKRKKSTPKEETVNDPEEAGHRSGSKKKR
O00567_564	VNDPEEAGHRSGSKKKRKFSKEEPVSSGPEEAVGKSSSKKK
O00567_87	VSEGVVHEDLRLLLETHLPSKKKKVLLGVGDPKIGAAIQEE
O00571_215	IELTRYTRPTPVQKHAIPIIKEKRDLMACAQTGSGKTAAFL
O14503_167	QTCAREVLQYLAKHENTRDLKSSQLVTHLHRVVSELLQGGT
O14503_279	PCFKSDHGRRFTMGERIGAIKQESEEPPTKKNRMQLSDDEG
O14503_288	RFTMGERIGAIKQESEEPPTKKNRMQLSDDEGHFTSSDLIS
O14628_383	FISCSSLSNQQMILAGEKLSKCETWYKGFNHSPNPSKHQRN
O14628_492	GKVFRTCSSLSNHKRTHSEEKPYTCEECGNIFKQLSDLTKH
O14639_620	RQLQEEQLMKLNSGLGQLILKEEMEKESRERSSLLASRYDS
O14776_503	EPLPMETEEEDPKEEPIKEIKEEPKEEEMTEEEKAAQKAKP
O14776_507	METEEEDPKEEPIKEIKEEPKEEEMTEEEKAAQKAKPVATA
O14776_608	RHPTPTMLSIQKWQFSMSAIKEEQELMEEINEDEPVKAKKR
O14924_196	ATRFDVGHESINNPNPNMLSKEEISKVIHDDSVFSIGLESH
O14965_258	TELANALSYCHSKRVIHRDIKPENLLLGSAGELKIADFGWS
O14978_157	TEVLLEEPLPLETARESPSFKLEPMETERSPGPRLQELLGP
O14978_17	XXXXMASGPGSQEREGLLIVKLEEDCAWSQELPPPDPGPSP
O14978_285	VPGTQVGQGGKLWDPSVQSCKEGLSPRGPAPGEEKFENLEG
O14978_299	PSVQSCKEGLSPRGPAPGEEKFENLEGVPSVCSENIHPQVL
O14978_376	ALAGASSGRELGRPKELQPKKLHLCPLCGKNFSNNSNLIRH
O14978_573	EAVSDSTPFLTNHGAHKAEKKLFECLTCGKSFRQGMHLTRH
O14978_582	LTNHGAHKAEKKLFECLTCGKSFRQGMHLTRHQRTHTGEKP
O14979_209	RGFGFVLFKDAASVDKVLELKEHKLDGKLIDPKRAKALKGK
O15014_1061	KQKPSIPPTLTKAPSLTDLVKSGPGKAKEPGADPAKSVIIP
O15014_1153	RQEAEPRMWTYVYPAKYSDIKSEDERWKEERDRKLKEERSR
O15014_1297	EDADKARASPSVTCKSSSESKALDILQQHASHYKSKSPTIS
O15014_479	GSKRVRTNSMGSATGPLPGTKVEPTVLDRNCPSPVLIDCPH
O15014_789	KMEGLLNGSSDPHQSRLASIKAEADKIYSFTDNAPSPSIGG
O15015_1157	QHMAEEGPGQAEVEKLQEELKVEPLEEVARVKEEVWEETTV
O15015_1168	EVEKLQEELKVEPLEEVARVKEEVWEETTVKGEEIEPRLET
O15015_1178	VEPLEEVARVKEEVWEETTVKGEEIEPRLETAEKGCQTEAS
O15015_451	GENGQPSVPPAPLLLAETTHKEEEDPTTTLDHRPYKCSECG
O15015_534	HCKAARRSADIGAEGAPSHLKVELPPDPVEAEAAPHTDQDH
O15015_557	LPPDPVEAEAAPHTDQDHVCKHEEEATDITPAADKTAAHIC
O15015_688	RRRSRRHRKRAGGASGGREAKLLAAESWTRELEDNEGLESP
O15042_145	EGSDGNKVKTFVRGGVVNAAKEEHETDEKRGKIYKPSSRFA
O15042_168	HETDEKRGKIYKPSSRFADQKNPPNQSSNERPPSLLVIETK
O15042_208	KKPPLKKGEKEKKKSNLELFKEELKQIQEERDERHKTKGRL
O15042_748	PIKSLDDDLDGVPLDATEDSKKNEPIFKVAPSKWEAVDESE
O15042_749	IKSLDDDLDGVPLDATEDSKKNEPIFKVAPSKWEAVDESEL
O15042_760	PLDATEDSKKNEPIFKVAPSKWEAVDESELEAQAVTTSKWE
O15042_80	ARESLCDSPHQNLSRPLLENKLKAFSIGKMSTAKRTLSKKE
O15042_822	DEEDTQSSKSEEHHLYSNPIKEEMTESKFSKYSEMSEEKRA
O15042_829	SKSEEHHLYSNPIKEEMTESKFSKYSEMSEEKRAKLREIEL
O15042_832	EEHHLYSNPIKEEMTESKFSKYSEMSEEKRAKLREIELKVM
O15054_1109	MLKLRSLSEGPPKELKIRLIKVESGDKETFIASEVEERRLR
O15060_183	GDYLGADRNYVLPSDAGGSYKEEEKNVASDANHSLHLPQPP
O15060_439	RRDGIFENNIIVHPNDPLPGKLGLFSGAASPELKCAACGKV
O15062_239	PENGPSGVHSREEFFSPDSLKIVDNPKADGMTDNQEDSAIM
O15062_322	EAAPEKSSFQCENPEVGLGEKEHMRVVVKSEPLSSPEPQDE
O15062_330	FQCENPEVGLGEKEHMRVVVKSEPLSSPEPQDEVSDVTSQA
O15062_404	SSTDRVGDIHILEVTNNLEHKSTFSISNFLNKSRGNNFTAN
O15062_415	LEVTNNLEHKSTFSISNFLNKSRGNNFTANQNNDDNIPNTT
O15062_541	MIGSPRGGASNFPYYRRIAPKMPVVTSVRSSQIPENSTSSQ
O15062_594	GHPSQPGPPQLTRASADVLSKCKKALSEHNVLVVEGARKYA
O15062_597	SQPGPPQLTRASADVLSKCKKALSEHNVLVVEGARKYACKI
O15062_645	LTDCKKHIRVHTGEKPYACLKCGKRFSQSSHLYKHSKTTCL
O15062_658	EKPYACLKCGKRFSQSSHLYKHSKTTCLRWQSSNLPSTLLX
O15145_14	XXXXXXXMPAYHSSLMDPDTKLIGNMALLPIRSQFKGPAPR
O15164_1041	DNKFSDDSDDDFVQPRKKRLKSIEERQLLKXXXXXXXXXXX
O15164_205	KTCIRAHQRVKFTKDHTVRQKEEVSPEAVGVTSQRPVFCPF
O15164_276	YQFIEEAFQNQKVIIDTLITKLMEKTKYIKFTGNQIQNRII
O15164_436	NIINLGSLVIEDKESQPQMPKQNPVVEQNSQPPSGLSSNQL
O15164_458	NPVVEQNSQPPSGLSSNQLSKFPTQISLAQLRLQHMQQQVM
O15164_552	PPHPQQLRYPPNQNIPRQAIKPNPLQMAFLAQQAIKQWQIS
O15164_641	LPSLPDIDCSSTIMLDNIVRKDTNIDHGQPRPPSNRTVQSP
O15164_7	XXXXXXXXXXXXXXMEVAVEKAVAAAAAASAAASGGPSAAP
O15164_702	PIRSPSASSVGSRGSSGSSSKPAGADSTHKVPVVMLEPIRI
O15164_711	VGSRGSSGSSSKPAGADSTHKVPVVMLEPIRIKQENSGPPE
O15164_723	PAGADSTHKVPVVMLEPIRIKQENSGPPENYDFPVVIVKQE
O15164_741	RIKQENSGPPENYDFPVVIVKQESDEESRPQNANYPRSILT
O15164_801	DAPDSTGDQPGLHQDNSSNGKSEWLDPSQKSPLHVGETRKE
O15164_810	PGLHQDNSSNGKSEWLDPSQKSPLHVGETRKEDDPNEDWCA
O15164_875	PTLTNFPSGEWICTFCRDLSKPEVEYDCDAPSHNSEKKKTE
O15164_949	PLTVPDYYKIIKNPMDLSTIKKRLQEDYSMYSKPEDFVADF
O15164_992	IFQNCAEFNEPDSEVANAGIKLENYFEELLKNLYPEKRFPK
O15212_66	ELALLDGSNVVFKLLGPVLVKQELGEARATVGKRLDYITAE
O15226_500	CKVILESEVIAEAVGVKKTVKYEAAGEAVKTLKKTQPTVIN
O15226_666	KSKSHGVGHDRYLVVGRKRRKEDLLDQLKQEGQVGHYELVM
O15226_674	HDRYLVVGRKRRKEDLLDQLKQEGQVGHYELVMPQANXXXX
O15226_68	GSKFHARPRFEPVHFVASSSKDERQEDPYGPQTKEVNEQTH
O15265_257	PMHPIQQSRVPHGRIMTPSVKVEKIHPKMDGTLLKSAVGPT
O15350_627	DEWADFGFDLPDCKARKQPIKEEFTEAEIHXXXXXXXXXXX
O15372_303	QENMQRQSRGEPPLPEEDLSKLFKPPQPPARMDSLLIAGQI
O15381_208	LDLSCEKSNPKKPITEIQDSKDSSLLESDMKRKGKLKNKGS
O15446_270	TKKRKKPKGKETFEPEDKTVKQEQINTEPLEDTVLSPTKKR
O15446_314	KGTEGMEPEEGVTVESQPQVKVEPLEEAIPLPPTKKRKKEK
O15525_14	XXXXXXXMTTPNKGNKALKVKREPGENGTSLTDEELVTMSV
O15535_215	TEDRELVLRKDCPKIVEPHGKMFNEQTWEVSQQDPSHGEVG
O15535_238	NEQTWEVSQQDPSHGEVGEHKDRIERQWGNLLGEGQHKCDE
O15535_26	KEVLSLGVQVPEAWEELLTMKVEAKSHLQWQESRLKRSNPL
O43143_786	YDMSNFPQCEAKRQLDRIIAKLQSKEYSQYXXXXXXXXXXX
O43151_1188	KAAAEKKKIQKEKLSTPEKIKQEALELAGITSDPGLSLKGG
O43151_1219	SDPGLSLKGGLSQQGLKPSLKVEPQNHFSSFKYSGNAVVES
O43151_1397	SVSRDPSPFAQSSNCYNRSIKQEPVDPLTQAEPVPRDAGKM
O43151_1561	DFNSALKGSPGFQDKLWNPMKGEEGRIPAAGASQLDRAWQS
O43151_491	SDYIQSVFKRPEALPTKPKVKVEAPSSSPAPAPSPVLQREA
O43175_21	MAFANLRKVLISDSLDPCCRKILQDGGLQVVEKQNLSKEEL
O43242_38	PPGGGEQEPPPPPAPQDVEMKEEAATGGGSTGEADGKTAAA
O43248_116	ADELMHRECLPPSTVTEILMKNEGSYGGHHHPSAPHATPAG
O43248_178	AYCGGGDPPAEPPCSGKGEAKGEPEAPPASGLASRAEAGAE
O43248_82	PYSAQVPPVREVSYGLEPSGKWHHRNSYSSCYAAADELMHR
O43290_125	AASSKTSSGDASSLSIEETNKLRAKLGLKPLEVNAIKKEAG
O43290_133	GDASSLSIEETNKLRAKLGLKPLEVNAIKKEAGTKEEPVTA
O43290_141	EETNKLRAKLGLKPLEVNAIKKEAGTKEEPVTADVINPMAL
O43290_147	RAKLGLKPLEVNAIKKEAGTKEEPVTADVINPMALRQREEL
O43290_188	REKLAAAKEKRLLNQKLGKIKTLGEDDPWLDDTAAWIERSR
O43290_277	LTVEHAIDSFREGETMILTLKDKGVLQEEEDVLVNVNLVDK
O43290_329	KKPDYLPYAEDESVDDLAQQKPRSILSKYDEELEGERPHSF
O43290_336	YAEDESVDDLAQQKPRSILSKYDEELEGERPHSFRLEQGGT
O43290_400	STVGPRLASEYLTPEEMVTFKKTKRRVKKIRKKEKEVVVRA
O43290_414	EEMVTFKKTKRRVKKIRKKEKEVVVRADDLLPLGDQTQDGD
O43290_548	IVKKLESRQRGWEEDEDPERKGAIVFNATSEFCRTLGEIPT
O43290_648	LDEEPIVNRGLAAALLLCQNKGLLETTVQKVARVKAPNKSL
O43290_657	GLAAALLLCQNKGLLETTVQKVARVKAPNKSLPSAVYCIED
O43290_684	PNKSLPSAVYCIEDKMAIDDKYSRREEYRGFTQDFKEKDGY
O43290_699	MAIDDKYSRREEYRGFTQDFKEKDGYKPDVKIEYVDETGRK
O43290_709	EEYRGFTQDFKEKDGYKPDVKIEYVDETGRKLTPKEAFRQL
O43290_723	GYKPDVKIEYVDETGRKLTPKEAFRQLSHRFHGKGSGKMKT
O43290_749	LSHRFHGKGSGKMKTERRMKKLDEEALLKKMSSSDTPLGTV
O43290_758	SGKMKTERRMKKLDEEALLKKMSSSDTPLGTVALLQEKQKA
O43290_775	LLKKMSSSDTPLGTVALLQEKQKAQKTPYIVLSGSGKSMNA
O43290_780	SSSDTPLGTVALLQEKQKAQKTPYIVLSGSGKSMNANTITK
O43290_791	LLQEKQKAQKTPYIVLSGSGKSMNANTITKXXXXXXXXXXX
O43296_425	GKAFNHRSYLKRHQRIHTGEKPFVCSECGKAFTHCSTFILH
O43298_182	HTDFPKAQELRDGENEEESTKDELSSQLTEHEYLPSNSSTE
O43298_241	DSAEFHYTRPMYSKPSIMAHKRWIHVKPERLEQACEGMDVH
O43298_247	YTRPMYSKPSIMAHKRWIHVKPERLEQACEGMDVHATYDEH
O43298_297	QTEHTVQPSGVEEDFHIGEKKVEAEFDEQADESNYDEQVDF
O43298_358	RQEAALAAGYSENIEMVTGIKEEASHLGFSATDKLYPCQCG
O43298_458	MWRDSFHRHVTSCTKSYEAAKAEQNTTEANXXXXXXXXXXX
O43309_196	LESQQEQVLDVETGNEYGNLKQEVSEEMEPHGKTSSKFEND
O43309_20	XMASTWAIQAHMDQDEPLEVKIEEEKYTTRQDWDLRKNNTH
O43309_25	WAIQAHMDQDEPLEVKIEEEKYTTRQDWDLRKNNTHSREVF
O43361_761	RQKTHTGERSYECGESSKVFKYNSSLIKHQIIHTGKRPXXX
O43361_768	ERSYECGESSKVFKYNSSLIKHQIIHTGKRPXXXXXXXXXX
O43390_13	XXXXXXXXMANQVNGNAVQLKEEEEPMDTSSVTHTEHYKTL
O43390_171	PPDSVYSGVQPGIGTEVFVGKIPRDLYEDELVPLFEKAGPI
O43390_359	KVKVLFVRNLATTVTEEILEKSFSEFGKLERVKKLKDYAFV
O43395_139	VEEEPEVIPGPPSESPGMLTKLQIKQMMEAATRQIEERKKQ
O43395_244	IGNANMVGLANLHAMGIAPPKVELKDQTKPTPLILDEQGRT
O43395_252	LANLHAMGIAPPKVELKDQTKPTPLILDEQGRTVDATGKEI
O43439_38	QWKVGPEKRVPAMPGSPVEVKIQSRSSPPTMPPLPPINPGG
O43439_449	GTGYVPVEFWKKTEEAVNKVKIQAMSEVQKAVAEAEQKAFE
O43491_140	EEQRQAKGDAEEMAQKKQEIKVEVKEEKPSVSKEEKPSVSK
O43491_144	QAKGDAEEMAQKKQEIKVEVKEEKPSVSKEEKPSVSKVEMQ
O43513_185	QNCLASLPDDLPHSEAGMRVKTEPMDADDSNNCTGQNEHQR
O43719_429	SKMNAQETATGMAFEEPIDEKKFEKTEDGGEFEEGASENNA
O43719_430	KMNAQETATGMAFEEPIDEKKFEKTEDGGEFEEGASENNAK
O43795_287	EAESVLAVVAAVLKLGNIEFKPESRVNGLDESKIKDKNELK
O43818_113	QEEEKAEARAFEEDQVAGRLKEDVLEQRGRLQKLVAKEIQA
O43823_317	GPDGTGRKRKQFQLYEEPDTKLARVDSEGDFSENDDAAGDF
O43823_567	TSETVDPEMEGDDNLGGEDKKETPEEVAADVLAEVITAAVR
O43829_203	PSQEDGKSPTTTLRVQEAILKELGSEEVRKVNCYGQEVESM
O43829_249	KDLGSQTPQALTFNDGMSEVKDEQTPGWTTAASDMKFEYLL
O43829_46	LNEQRLEGEFCDIAIVVEDVKFRAHRCVLAACSTYFKKLFK
O60216_216	EQSTSNLNEKINHLEYEDQYKDDNFGEGNDGGILDDKLISN
O60216_418	PEDLRKRRKGGEADNLDEFLKEFENPEVPREDQQQQHQQRD
O60216_48	TKAHVFECNLESSVESIISPKVKMALRTSGHLLLGVVRIYH
O60264_644	KLRLDSIVIQQGRLVDQNLNKIGKDEMLQMIRHGATHVFAS
O60264_647	LDSIVIQQGRLVDQNLNKIGKDEMLQMIRHGATHVFASKES
O60264_694	IDGILERGAKKTAEMNEKLSKMGESSLRNFTMDTESSVYNF
O60264_722	NFTMDTESSVYNFEGEDYREKQKIAFTEWIEPPKRERKANY
O60264_735	EGEDYREKQKIAFTEWIEPPKRERKANYAVDAYFREALRVS
O60264_83	DDASPGKQKEIQEPDPTYEEKMQTDRANRFEYLLKQTELFA
O60264_966	NYTEEEDRFLICMLHKLGFDKENVYDELRQCIRNSPQFRFD
O60315_391	NKLENGKPLSMSEQTGLLKIKTEPLDFNDYKVLMATHGFSG
O60315_479	EVQKVLQIVDNTVSRQKMDCKAEEISKLKGYHMKDPCSQPE
O60315_555	EAKACLQSLTTDSRRQISNIKKEKLRTLIDLVTDDKMIENH
O60315_611	PGPIPLHQHERYLCKMNEEIKAVLQPHENIVPNKAGVFVDN
O60315_632	AVLQPHENIVPNKAGVFVDNKALLLSSVLSEKGMTSPINPY
O60315_713	EQRKVYQYSNSRSPSLERSSKPLAPNSNPPTKDSLLPRSPV
O60315_866	HNSVSSSSENSDEPLNLTFIKKEFSNSNNLDNKSTNPVFSM
O60341_442	HVKDEQIEHWKKIVKTQEELKELLNKMVNLKEKIKELHQQY
O60341_469	VNLKEKIKELHQQYKEASEVKPPRDITAEFLVKSKHRDLTA
O60481_248	VNVAAHHGPGAFFRYMRQPIKQELSCKWIDEAQLSRPKKSC
O60493_95	EWLRSELERESKVVVPPLPGKAFLRQLPFRGDDGIFDDNFI
O60506_168	PPDSVYSGQQPSVGTEIFVGKIPRDLFEDELVPLFEKAGPI
O60506_607	SQPIAQQPLQGGDHSGNYGYKSENQEFYQDTFGQQWKXXXX
O60563_342	NLTSVEMLPGKRWLSSQPSFKLEPTQGHRTSENLALTGVDH
O60563_415	KHAEELAAQKRQLENMEANVKSQYAYAAQNLLSHHDSHSSV
O60563_481	KMRIPVAGGDKAASSKPEEIKMRIKVHAAADKHNSVEDSVT
O60583_407	ISLHSGLHHRPDKISDHSSVKQEYTHKAGSSKHHGPISTTP
O60675_130	KYEALQTFARTVARGPVAPSKVATTSVITIVKSTELSSTSV
O60716_421	KTDVRKLKGIPVLVGLLDHPKKEVHLGACGALKNISFGRDQ
O60716_517	LTDEVIIPHSGWEREPNEDCKPRHIEWESVLTNTAGCLRNV
O60716_882	SHSYDDSTLPLIDRNQKSDKKPDREEIQMSNMGSNTKSLDN
O60765_110	SHKTTKSTQTQDSSFQGLILKRSNRNVPWDLKLEKPYIYEG
O60765_121	DSSFQGLILKRSNRNVPWDLKLEKPYIYEGRLEKKQDKKGS
O60765_139	DLKLEKPYIYEGRLEKKQDKKGSFQIVSATHKKIPTIERSH
O60765_171	KIPTIERSHKNTELSQNFSPKSVLIRQQILPREKTPPKCEI
O60765_268	SKAFSQSSALIQHQITHTGEKPYICKECGKAFTLSTSLYKH
O60784_385	EFDMFALTRGSSLADQRKEVKYEAPQATDGLAGALDARQQS
O60832_191	RALETLTGALFQRPPLIAAVKRQLRVRTIYESKMIEYDPER
O60832_20	XMADAEVIILPKKHKKKKERKSLPEEDVAEIQHAEEFLIKP
O60832_39	RKSLPEEDVAEIQHAEEFLIKPESKVAKLDTSQWPLLLKNF
O60832_394	DTYPRKWGLGPKASQKKLMIKQGLLDKHGKPTDSTPATWKQ
O60832_413	IKQGLLDKHGKPTDSTPATWKQEYVDYSESAKKEVVAEVVK
O60832_424	PTDSTPATWKQEYVDYSESAKKEVVAEVVKAPQVVAEAAKT
O60832_43	PEEDVAEIQHAEEFLIKPESKVAKLDTSQWPLLLKNFDKLN
O60832_433	KQEYVDYSESAKKEVVAEVVKAPQVVAEAAKTAKRKRESES
O60832_467	RKRESESESDETPPAAPQLIKKEKKKSKKDKKAKAGLESGA
O60884_134	EDMMHPLKVSLEDLYNGKTTKLQLSKNVLCSACSGQGGKSG
O60885_1050	PPQPAKPQQVIQHHHSPRHHKSDPYSTGHLREAPSPLMIHS
O60885_1111	PKKQELRAASVVQPQPLVVVKEEKIHSPIIRSEPFSPSLRP
O60885_1197	KDKQKQEPKTPVAPKKDLKIKNMGSWASLVQKHPTTPSSTA
O60885_585	AKEPPPKKTKKNNSSNSNVSKKEPAPMKSKPPPTYESEEED
O60885_645	LPGEKLGRVVHIIQSREPSLKNSNPDEIEIDFETLKPSTLR
O60885_694	CLRKKRKPQAEKVDVIAGSSKMKGFSSSESESSSESSSSDS
O60885_99	FAWPFQQPVDAVKLNLPDYYKIIKTPMDMGTIKKRLENNYY
O60934_529	SENEPVDTNSDNNLFTDTDLKSIVKNSASKSHAAEKLRSNK
O60934_571	REMDDVAIEDEVLEQLFKDTKPELEIDVKVQKQEEDVNVRK
O60934_582	VLEQLFKDTKPELEIDVKVQKQEEDVNVRKRPRMDIETNDT
O75123_445	HSGDRPFECKDCGKAFIQSSKLLLHQIIHTGEKPYVCSYCG
O75132_43	KIEEEDDDGIPPDSLERMDFKSEQEDMKQTDSGGERAGLGG
O75132_489	PMDSLKAECRYCGCAISRGKKGDVGTSCLMRHLYRRHPEVV
O75150_578	PDNRKEMAPVPGTTTTTTSVKKEELVPSEEDFQGITPGAQG
O75150_579	DNRKEMAPVPGTTTTTTSVKKEELVPSEEDFQGITPGAQGP
O75151_711	FPIRRKKNAPKRDLSFLLDKKAVLPTPVTKPKLDSAAYKSD
O75152_114	FLPPSKTVLPTVPESPEEEVKASQLSVQQNKLSVQSNPSPQ
O75152_124	TVPESPEEEVKASQLSVQQNKLSVQSNPSPQLRSVMKVESS
O75152_140	VQQNKLSVQSNPSPQLRSVMKVESSENVPSPTHPPVVINAA
O75152_478	EPAGKTKSMQEVHIKTLEEIKLEKALRVQQSSESSTSSPSQ
O75152_619	TAVPGITRHLTKRLPTKSSQKVEVETSGIGDSLLNVKCAAQ
O75179_318	IKGDITPLMAAANGGHVKIVKLLLAHKADVNAQSSTGNTAL
O75362_819	PGKAPLTSGIDSSTLAPSNLKSHRPQQNVGVQGAATRQQQS
O75367_123	GGVLPNIHPELLAKKRGSKGKLEAIITPPPAKKAKSPSQKK
O75367_167	KKAGGKKGARKSKKKQGEVSKAASADSTTEGTPADGFTVLS
O75367_189	ASADSTTEGTPADGFTVLSTKSLFLGQKLNLIHSEISNLAG
O75367_323	DKKLKSIAFPSIGSGRNGFPKQTAAQLILKAISSYFVSTMS
O75376_1106	ISLGLPRQQESAKSATLPYIKQEEFSPRSQNSQPEGLLVRA
O75376_1184	SITQGTPALPQTGIPTEALVKGSISRMPIEDSSPEKGREEA
O75376_1389	EVVQSTRPIIEGSISQGTPIKFDNNSGQSAIKHNVKSLITG
O75376_1412	NNSGQSAIKHNVKSLITGPSKLSRGMPPLEIVPENIKVVER
O75376_1518	MMNRTSDVTISSNKSTNHERKSTLTPTQRESIPAKSPVPGV
O75400_191	PDDLKTPAEQLLSKCPWKEYKSDSGKPYYYNSQTKESRWAK
O75400_241	YQNTIVAGSLITKSNLHAMIKAEESSKQEECTTTSTAPVPT
O75400_375	VSSNTGEETSKQETVADFTPKKEEEESQPAKKTYTWNTKEE
O75400_376	SSNTGEETSKQETVADFTPKKEEEESQPAKKTYTWNTKEEA
O75444_29	NSDLPTSPLAMEYVNDFDLMKFEVKKEPVETDRIISQCGRL
O75444_33	PTSPLAMEYVNDFDLMKFEVKKEPVETDRIISQCGRLIAGG
O75444_331	QQRHVLESEKNQLLQQVDHLKQEISRLVRERDAYKEKYEKL
O75446_194	NKAQLVEIVGCHFRSIPVNEKDTLTYFIYSVKNDKNKSDLK
O75446_205	HFRSIPVNEKDTLTYFIYSVKNDKNKSDLKVDSGVHXXXXX
O75446_214	KDTLTYFIYSVKNDKNKSDLKVDSGVHXXXXXXXXXXXXXX
O75446_87	CCLREDGERCGRAAGNASFSKRIQKSISQKKVKIELDKSAR
O75461_9	XXXXXXXXXXXXMSQQRPARKLPSLLLDPTEETVRRRCRDP
O75475_75	PKDIFPYSENKEKYGKPNKRKGFNEGLWEIDNNPKVKFSSQ
O75478_132	KHYMKHFINNPLFASTLLNLKQAEEAKTADTAIPFHSTDDP
O75478_138	FINNPLFASTLLNLKQAEEAKTADTAIPFHSTDDPPRPTFD
O75486_112	KKLRRLLKYMFIRDYKSKIVKGIDEDDLLEDKLSGSNNANK
O75486_123	IRDYKSKIVKGIDEDDLLEDKLSGSNNANKRQKIAQDFLNS
O75486_163	SIDQTGELLAMFEDDEIDEVKQERMERAERQTRIMDSAQYA
O75525_4	XXXXXXXXXXXXXXXXXMEEKYLPELMAEKDSLDPSFTHAL
O75528_129	KAGHGPGPGPGRPKSKNLQPKIQEYEFTDDPIDVPRIPKND
O75528_21	MSELKDCPLQFHDFKSVDHLKVCPRYTAVLARSEDDGIGIE
O75533_214	SKRKRRWDQTADQTPGATPKKLSSWDQAETPGHTPSLRWDE
O75533_413	DERNRPLSDEELDAMFPEGYKVLPPPAGYVPIRTPARKLTA
O75533_430	EGYKVLPPPAGYVPIRTPARKLTATPTPLGGMTGFHMQTED
O75534_91	FEVSSDRRTGKPIAVKLVKIKQEILPEERMNGQVVCAVPHN
O75586_208	FPPKFVQLKPGEKPVPVDQTKKEAEPIPETVKPEEKETTKN
O75626_816	DLPLMKLPPSNPLPLVPVKVKQETVEPMDPXXXXXXXXXXX
O75643_46	SLIDRTRRDEPTGEVLSLVGKLEGTRMGDKAQRTKPQMQEE
O75694_740	FLDRNSQFAGGPLGNPNTTAKVQQRLIGFMRPENGNPQQMQ
O75717_1127	SKKQKPLDFSTNQKLSAFAFKQEXXXXXXXXXXXXXXXXXX
O75717_397	LEDDENSVDISMLKTGSSLLKEEEEDGQEGSIHNLPLVTSQ
O75820_160	RPNSEEKCHKCEECGKGFVRKAHFIQHQRVHTGEKPFQCNE
O75820_434	GLIQHQRIHTREKTYPYNETKESFDPNCSLVIQQEVYPKEK
O75820_452	ETKESFDPNCSLVIQQEVYPKEKSYKCDECGKTFSVSAHLV
O75820_67	YGNLVSLDVLNRDKDEEPTVKQEIEEIEEEVEPQGVIVTRI
O75820_88	QEIEEIEEEVEPQGVIVTRIKSEIDQDPMGRETFELVGRLD
O75822_106	RQQKKRQEEIKKRLEEPEEPKVLTPEEQLADKLRLKKLQEE
O75925_137	KHELELPHLTSALHPVHPDIKLQKLPFYDLLDELIKPTSLA
O75925_238	NLCVKVNTKPCSLPGYLPPTKNGVEPKRPSRPINITSLVRL
O75925_40	QVLLGYAGRNKHGRKHELLTKALHLLKAGCSPAVQMKIKEL
O75925_453	DGCLSSTLEHQVASHHQSSNKNKKVEVIDLTIDSSSDEEEE
O75925_46	AGRNKHGRKHELLTKALHLLKAGCSPAVQMKIKELYRRRFP
O75925_493	EEPSAKRTCPSLSPTSPLNNKGILSLPHQASPVSRTPSLPA
O75928_249	SLCIKVNGKLFPLPGYAPPPKNGIEQKRPGRPLNITSLVRL
O75928_430	CSDVDEIKFQEDGSWCPMRPKKEAMKVSSQPCTKIESSSVL
O75928_435	EIKFQEDGSWCPMRPKKEAMKVSSQPCTKIESSSVLSKPCS
O75928_443	SWCPMRPKKEAMKVSSQPCTKIESSSVLSKPCSVTVASEAS
O75928_452	EAMKVSSQPCTKIESSSVLSKPCSVTVASEASKKKVDVIDL
O75928_46	AGRNKSGRKHDLLMRALHLLKSGCSPAVQIKIRELYRRRYP
O75928_489	VIDLTIESSSDEEEDPPAKRKCIFMSETQSSPTKGVLMYQP
O75928_502	EDPPAKRKCIFMSETQSSPTKGVLMYQPSSVRVPSVTSVDP
O76021_120	KDEPNSTPEKTEQFYRKLLNKHGIKTVSQIISLQTLKKEYK
O76021_254	TKGLSEKLPEKWESVKLLFVKTEKSAALPIFSSFVSNWDEA
O76021_380	ESEDEIPQLVPIGKKTPANEKVEIQKHATGKKSPAKSPNPS
O76021_435	TPKAAESETPGKSPEKKPKIKEEAVKEKSPSLGKKDARQTP
O76021_461	EKSPSLGKKDARQTPKKPEAKFFTTPSKSVRKASHTPKKWP
O76094_391	NAAEIKLTMAQLKISQGNISKACLILRSIEELKHKPGMVSA
O94776_492	LLQPRRAARRPYAPINANAIKAECSIRLPKAAKTPLKIHPL
O94776_508	ANAIKAECSIRLPKAAKTPLKIHPLVRLPLATIVKDLVAQA
O94776_559	KTPINRNQLSQNRGLGGIMVKRAYETMAGAGVPFSANGRPL
O94776_595	NGRPLASGIRSSSQPAAKRQKLNPADAPNPVVFVATKDTRA
O94826_275	QFIKSYFSSFTDDIISQPMLKGEKSDEDKDKEGEALEVKEN
O94864_271	KQLSEEYERIVNPEKATEDAKPVKIKEEPVSDITFPVSEEL
O94888_134	FQTETIRQEQELRNGGAIDKKLTTLADLFRPPIDLMHKGSF
O94888_84	ASVSTVRPHTEEEVRAPIPQKQEILVEPEPLFGAPKRRRPA
O94901_195	AAATAHNGFSCSNCSMLSERKDVLTAHPAAPGPVSRVYSRD
O94913_1278	AYPDNHLSQVDVNELFSKLLKTGILKLSQTDSATTQVSEVT
O94913_1419	DLEERAKSQFFEKVHEEVVLKTQEAAKEKEFQSVPAGPAGA
O94913_1511	TPSPSKTPVENPLNIMLNIVKNELQEPCDSPKVKEERIDTP
O94913_1524	NIMLNIVKNELQEPCDSPKVKEERIDTPPACTEESIATPSE
O94913_1546	ERIDTPPACTEESIATPSEIKTENDTVESVXXXXXXXXXXX
O94913_291	QVPVQSEKSRPGPSLQIQDLKGTNRDPRLNRISQHSHGKDQ
O94913_328	GKDQSHRKEFLMNTLNQSDTKTSKTIPSEKLNSSKQEKSKS
O94913_456	KSSEHRLAGSRNKIINGIVQKQDTITEESEKQGTKPGRSST
O94913_654	PRAPKQQQHRLSVDANLQIPKELTLASKRELLQKTSERLAS
O94913_723	QRSPFNDRFPLKRPRYEDSDKPFVDSPASRFAGLDTNQRLT
O94916_556	VQPFTYTPDPAAAGALNVNVKKEISSPARPCSFEEAMKAMK
O94916_603	DKVNIIPNALMTPLIPSSMIKSEDVTPMEVTAEKRSSTIFK
O95073_94	RLKEYAKQELLQQKETQSDFKSNISEPTKKVMEMIPQISSF
O95125_22	ATAVEPEDQDLWEEEGILMVKLEDDFTCRPESVLQRDDPVL
O95125_454	YTRSSHLARHQKVHKMNAPYKYPLNRKNLEETSPVTQAERT
O95125_460	LARHQKVHKMNAPYKYPLNRKNLEETSPVTQAERTPSVEKP
O95125_507	GKHFRWTSDLVRHQRTHTGEKPFFCTICGKSFSQKSVLTTH
O95125_521	RTHTGEKPFFCTICGKSFSQKSVLTTHQRIHLGGKPYLCGE
O95201_219	GAVEVGQRVQTSSVAALGNVKPFRTRAGRVQWGVPQCAQEA
O95232_424	NTESKESDTKNEVNGTSEDIKSEGDTQSNXXXXXXXXXXXX
O95239_1194	EQVLSKKTPPAPSPFDLPELKHVATEYQENKAPGKKKKRAL
O95251_323	SEYDLDLFRRAQARASEDLEKLRLQGQITEGSNMIKTIAFG
O95365_436	KVRFTRQDKLKVHMRKHTGEKPYLCQQCGAAFAHNYDLKNH
O95365_539	GAPAQPSSPDARRNGQEKHFKDEDEDEDVASPDGLGRLNVA
O95391_349	LFAWEAYDKGSEVHLQADPTKLELLYKSFKVKKEDFKEQQK
O95391_408	ELLLAQTEDYVEYSRHGTVIKGQERAVACSKYEEDVKIHNH
O95400_26	VTFQGVGDEEDEDEIIVPKKKLVDPVAGSGGPGSRFKGKHS
O95409_253	HHHHHHHPGAFFRYMRQQCIKQELICKWIDPEQLSNPKKSC
O95433_203	TEERKAKPAPSKTQARPVGVKIPTCKITLKETFLTSPEELY
O95478_80	QMKKTIKMHEKRNTKQKNDEKTPQGAVPAYLLDREGQSRAK
O95551_23	LGSCLEGGREAAEEEGEPEVKKRRLLCVEFASVASCDAAVA
O95551_82	FEPPVEESALERRPETISEPKTYVDLTNEETTDSTTSKISP
O95619_37	KGVTIVKPIVYGNVARYFGKKREEDGHTHQWTVYVKPYRNE
O95625_1043	VLAQQQGQKLSEVAEAIQTVKVEVAHISGGEXXXXXXXXXX
O95677_14	XXXXXXXMEDSQDLNEQSVKKTCTESDVSQSQNSRSMEMQD
O95677_52	MQDLASPHTLVGGGDTPGSSKLEKSNLSSTSVTTNGTGGEN
O95696_554	RARLLIELLRKREKLKREQVKVEQVAMELRLTPLTVLLRSV
O95696_594	VLDQLQDKDPARIFAQPVSLKEVPDYLDHIKHPMDFATMRK
O95785_1000	PPSSPLLKKTPLALAGSPTPKNPEDKSPQLSLSPRPASPKA
O95785_1005	LLKKTPLALAGSPTPKNPEDKSPQLSLSPRPASPKAQWPQS
O95785_1056	GPEPARDIRCEFCGEFFENRKGLSSHARSHLRQMGVTEWYV
O95785_1108	LKRRTQSRPGGPPNPPGPSPKALAKMMGGAGPGSSLEARSP
O95785_1112	TQSRPGGPPNPPGPSPKALAKMMGGAGPGSSLEARSPSDLH
O95785_1138	GPGSSLEARSPSDLHISPLAKKLPPPPGSPLGHSPTASPPP
O95785_1139	PGSSLEARSPSDLHISPLAKKLPPPPGSPLGHSPTASPPPT
O95785_1177	PPTARKMFPGLAAPSLPKKLKPEQIRVEIKREMLPGALHGE
O95785_1240	RAEPVRDIRCEFCGEFFENRKGLSSHARSHLRQMGVTEWSV
O95785_1282	GSPIDTLREILKKKSKPCLIKKEPPAGDLAPALAEDGPPTV
O95785_1343	PGAGPAQVPRELSLTPITGAKPSATGYLGSVAAKRPLQEDR
O95785_1356	LTPITGAKPSATGYLGSVAAKRPLQEDRLLPAEVKAKTYIQ
O95785_1370	LGSVAAKRPLQEDRLLPAEVKAKTYIQTELPFKAKTLHEKT
O95785_1372	SVAAKRPLQEDRLLPAEVKAKTYIQTELPFKAKTLHEKTSH
O95785_1382	DRLLPAEVKAKTYIQTELPFKAKTLHEKTSHSSTEACCELC
O95785_1448	WCVNGSPIETLSEWIKHRPQKVGAYRSYIQGGRPFTKKFRS
O95785_1464	HRPQKVGAYRSYIQGGRPFTKKFRSAGHGRDSDKRPSLGLA
O95785_1477	QGGRPFTKKFRSAGHGRDSDKRPSLGLAPGGLAVVGRSAGG
O95785_1523	AGRAADGGERPLAASPPGTVKAEEHQRQNINKFERRQARPP
O95785_1534	LAASPPGTVKAEEHQRQNINKFERRQARPPDASAARGGEDT
O95785_1560	ARPPDASAARGGEDTNDLQQKLEEVRQPPPRVRPVPSLVPR
O95785_1630	SIQEEWVRHLQRHILEMNFSKADPPPEESQAPQAQTAAAEA
O95785_883	YGDAQSLTTCEVCGACFETRKGLSSHARSHLRQLGVAESES
O95785_939	GLPDAHLGLPPGLAKKSSSLKEVVAGAPRPGLLSLAKPLDA
O95785_955	SSSLKEVVAGAPRPGLLSLAKPLDAPAVNKAIKSPPGFSAK
O95785_967	RPGLLSLAKPLDAPAVNKAIKSPPGFSAKGLGHPPSSPLLK
O95785_988	SPPGFSAKGLGHPPSSPLLKKTPLALAGSPTPKNPEDKSPQ
O95817_445	VEAILEKVQGLEQAVDNFEGKKTDKKYLMIEEYLTKELLAL
O95872_290	PGMGLGPRGEGRANPIPTVLKRDQEGLGYRSAPQPRVTHFP
O95926_143	GFSDYAAAQLRQYHRLTKQIKPDMETYERLREKHGEEFFPT
O95926_234	RNAKFNKKAERFYGKYTAEIKQNLERGTAVXXXXXXXXXXX
O95983_73	LGGSMDLSTFDFRTGKMLMSKMNKSRQRVRYDSSNQVKGKP
O95983_90	LMSKMNKSRQRVRYDSSNQVKGKPDLNTALPVRQTASIFKQ
O95983_92	SKMNKSRQRVRYDSSNQVKGKPDLNTALPVRQTASIFKQPV
O96019_62	GMVVERDDGSTLMEIDGDKGKQGGPTYYIDTNALRVPRENM
P00338_57	ISILMKDLADELALVDVIEDKLKGEMMDLQHGSLFLRTPKI
P00492_115	MTVDFIRLKSYCNDQSTGDIKVIGGDDLSTLTGKNVLIVED
P01100_113	PHPFGVPAPSAGAYSRAGVVKTMTGGRAQSIGRRGKVEQLS
P01100_128	RAGVVKTMTGGRAQSIGRRGKVEQLSPEEEEKRRIRRERNK
P01100_265	NDPEPKPSVEPVKSISSMELKTEPFDDFLFPASSRPSGSET
P01106_143	TFIKNIIIQDCMWSGFSAAAKLVSEKLASYQAARKDSGSPN
P01106_148	IIIQDCMWSGFSAAAKLVSEKLASYQAARKDSGSPNPARGH
P01106_298	ESGSPSAGGHSKPPHSPLVLKRCHVSTHQHNYAAPPSTRKD
P01106_52	YQQQQQSELQPPAPSEDIWKKFELLPTPPLSPSRRSGLCSP
P02545_171	ALSEKRTLEGELHDLRGQVAKLEAALGEAKKQLQDEMLRRV
P02545_201	KQLQDEMLRRVDAENRLQTMKEELDFQKNIYSEELRETKRR
P02545_208	LRRVDAENRLQTMKEELDFQKNIYSEELRETKRRHETRLVE
P02545_219	TMKEELDFQKNIYSEELRETKRRHETRLVEIDNGKQREFES
P02545_233	EELRETKRRHETRLVEIDNGKQREFESRLADALQELRAQHE
P02545_260	RLADALQELRAQHEDQVEQYKKELEKTYSAKLDNARQSAER
P02545_270	AQHEDQVEQYKKELEKTYSAKLDNARQSAERNSNLVGAAHE
P02545_311	ELQQSRIRIDSLSAQLSQLQKQLAAKEAKLRDLEDSLARER
P02545_32	SGAQASSTPLSPTRITRLQEKEDLQELNDRLAVYIDRVRSL
P02545_366	AEMRARMQQQLDEYQELLDIKLALDMEIHAYRKLLEGEEER
P02545_378	EYQELLDIKLALDMEIHAYRKLLEGEEERLRLSPSPTSQRS
P02545_417	RSRGRASSHSSQTQGGGSVTKKRKLESTESRSSFSQHARTS
P02545_420	GRASSHSSQTQGGGSVTKKRKLESTESRSSFSQHARTSGRV
P02545_450	FSQHARTSGRVAVEEVDEEGKFVRLRNKSNEDQSMGNWQIK
P02545_470	KFVRLRNKSNEDQSMGNWQIKRQNGDDPLLTYRFPPKFTLK
P02545_486	NWQIKRQNGDDPLLTYRFPPKFTLKAGQVVTIWAAGAGATH
P02545_597	AEYNLRSRTVLCGTCGQPADKASASGSGAQVGGPISSGSSA
P02545_97	IKAAYEAELGDARKTLDSVAKERARLQLELSKVREEFKELK
P04075_42	RIVAPGKGILAADESTGSIAKRLQSIGTENTEENRRFYRQL
P04406_186	DNFGIVEGLMTTVHAITATQKTVDGPSGKLWRDGRGALQNI
P04818_287	IQLQREPRPFPKLRILRKVEKIDDFKAEDFQIEGYNPHPTI
P04818_292	EPRPFPKLRILRKVEKIDDFKAEDFQIEGYNPHPTIKMEMA
P04818_308	IDDFKAEDFQIEGYNPHPTIKMEMAVXXXXXXXXXXXXXXX
P04843_538	SLETEHKALTSEIALLQSRLKTEGSDLCDRVSEMQKLDAQV
P05204_82	AGKEGNNPAENGDAKTDQAQKAEGAGDAKXXXXXXXXXXXX
P05388_297	AAAPVAAATTAAPAAAAAPAKVEAKEESEESDEDMGFGLFD
P05412_226	QPPHHLPQQMPVQHPRLQALKEEPQTVPEMPGETPPLSPID
P05412_35	NASFLPSESGPYGYSNPKILKQSMTLNLADPVGSLKPHLRA
P05412_50	NPKILKQSMTLNLADPVGSLKPHLRAKNSDLLTSPDVGLLK
P05412_56	QSMTLNLADPVGSLKPHLRAKNSDLLTSPDVGLLKLASPEL
P05412_70	KPHLRAKNSDLLTSPDVGLLKLASPELERLIIQSSNGHITT
P05423_141	GNWDKTVDVSDMGPSHIINIKKEKRETDEETKQILRMLEKD
P05423_152	MGPSHIINIKKEKRETDEETKQILRMLEKDDFLDDPGLRND
P05423_160	IKKEKRETDEETKQILRMLEKDDFLDDPGLRNDTRNMPVQL
P05423_190	RNDTRNMPVQLPLAHSGWLFKEENDEPDVKPWLAGPKEEDM
P05423_199	QLPLAHSGWLFKEENDEPDVKPWLAGPKEEDMEVDIPAVKV
P05423_206	GWLFKEENDEPDVKPWLAGPKEEDMEVDIPAVKVKEEPRDE
P05423_220	PWLAGPKEEDMEVDIPAVKVKEEPRDEEEEAKMKAPPKAAR
P05423_285	ELLFLQLPDTLPGQPPTQDIKPIKTEVQGEDGQVVLIKQEK
P05423_302	QDIKPIKTEVQGEDGQVVLIKQEKDREAKLAENACTLADLT
P05423_310	EVQGEDGQVVLIKQEKDREAKLAENACTLADLTEGQVGKLL
P05423_396	LGHVKHKLVCSPDFESLLDHKHRXXXXXXXXXXXXXXXXXX
P05423_68	LTLGGVKKKTFTPNIISRKIKEEPKEEVTVKKEKRERDRDR
P05423_78	FTPNIISRKIKEEPKEEVTVKKEKRERDRDRQREGHGRGRG
P05549_10	XXXXXXXXXXXMLWKLTDNIKYEDCEDRHDGTSNGTARLPQ
P05549_177	EEVPHVEDPGINIPDQTVIKKGPVSLSKSNSNAVSAIPINK
P05549_184	DPGINIPDQTVIKKGPVSLSKSNSNAVSAIPINKDNLFGGV
P05783_247	QIASSGLTVEVDAPKSQDLAKIMADIRAQYDELARKNREEL
P05783_370	AQTRAEGQRQAQEYEALLNIKVKLEAEIATYRRLLEDGEDF
P05783_372	TRAEGQRQAQEYEALLNIKVKLEAEIATYRRLLEDGEDFNL
P05783_417	DSSNSMQTIQKTTTRRIVDGKVVSETNDTKVLRHXXXXXXX
P05783_426	QKTTTRRIVDGKVVSETNDTKVLRHXXXXXXXXXXXXXXXX
P05783_81	GGLATGIAGGLAGMGGIQNEKETMQSLNDRLASYLDRVRSL
P05787_11	XXXXXXXXXXMSIRVTQKSYKVSTSGPRAFSSRSYTSGPGS
P05787_122	FASFIDKVRFLEQQNKMLETKWSLLQQQKTARSNMDNMFES
P05787_130	RFLEQQNKMLETKWSLLQQQKTARSNMDNMFESYINNLRRQ
P05787_197	NKYEDEINKRTEMENEFVLIKKDVDEAYMNKVELESRLEGL
P05787_264	VVLSMDNSRSLDMDSIIAEVKAQYEDIANRSRAEAESMYQI
P05787_285	AQYEDIANRSRAEAESMYQIKYEELQSLAGKHGDDLRRTKT
P05787_295	RAEAESMYQIKYEELQSLAGKHGDDLRRTKTEISEMNRNIS
P05787_304	IKYEELQSLAGKHGDDLRRTKTEISEMNRNISRLQAEIEGL
P05787_325	TEISEMNRNISRLQAEIEGLKGQRASLEAAIADAEQRGELA
P05787_393	EYQELMNVKLALDIEIATYRKLLEGEESRLESGMQNMSIHT
P05787_472	FSRTSSSRAVVVKKIETRDGKLVSESSDVLPKXXXXXXXXX
P06454_103	AESATGKRAAEDDEDDDVDTKKQKTDEDDXXXXXXXXXXXX
P06493_139	CHSRRVLHRDLKPQNLLIDDKGTIKLADFGLARAFGIPIRV
P06493_20	XMEDYTKIEKIGEGTYGVVYKGRHKTTGQVVAMKKIRLESE
P06493_6	XXXXXXXXXXXXXXXMEDYTKIEKIGEGTYGVVYKGRHKTT
P06493_9	XXXXXXXXXXXXMEDYTKIEKIGEGTYGVVYKGRHKTTGQV
P06733_202	MRIGAEVYHNLKNVIKEKYGKDATNVGDEGGFAPNILENKE
P06748_141	EDAESEDEEEEDVKLLSISGKRSAPGGGSKVPQKKVKLAAD
P06748_150	EEDVKLLSISGKRSAPGGGSKVPQKKVKLAADEDDDDDDEE
P06748_215	SIRDTPAKNAQKSNQNGKDSKPSSTPRSKGQESFKKQEKTP
P06748_248	FKKQEKTPKTPKGPSSVEDIKAKMQASIEKGGSLPKVEAKF
P06748_250	KQEKTPKTPKGPSSVEDIKAKMQASIEKGGSLPKVEAKFIN
P06748_257	TPKGPSSVEDIKAKMQASIEKGGSLPKVEAKFINYVKNCFR
P06748_263	SVEDIKAKMQASIEKGGSLPKVEAKFINYVKNCFRMTDQEA
P06748_267	IKAKMQASIEKGGSLPKVEAKFINYVKNCFRMTDQEAIQDL
P06748_27	MDMSPLRPQNYLFGCELKADKDYHFKVDNDENEHQLSLRTV
P06748_273	ASIEKGGSLPKVEAKFINYVKNCFRMTDQEAIQDLWQWRKS
P06748_32	LRPQNYLFGCELKADKDYHFKVDNDENEHQLSLRTVSLGAG
P07199_246	SVLLCANADGSEKLPPLVAGKSAKPRAGQAGLPCDYTANSK
P07355_49	AYTNFDAERDALNIETAIKTKGVDEVTIVNILTNRSNAQRQ
P07737_54	AVPGKTFVNITPAEVGVLVGKDRSSFYVNGLTLGGQKCSVI
P07910_176	SKRQRVSGNTSRRGKSGFNSKSGQRGSSKSGKLKGDDLQAI
P07910_223	IKQKVDSLLENLEKIEKEQSKQAVEMKNDKSEEEQSSSSVK
P07910_229	SLLENLEKIEKEQSKQAVEMKNDKSEEEQSSSSVKKDETNV
P07910_232	ENLEKIEKEQSKQAVEMKNDKSEEEQSSSSVKKDETNVKME
P07910_243	KQAVEMKNDKSEEEQSSSSVKKDETNVKMESEGGADDSAEE
P07910_244	QAVEMKNDKSEEEQSSSSVKKDETNVKMESEGGADDSAEEG
P07910_250	NDKSEEEQSSSSVKKDETNVKMESEGGADDSAEEGDLLDDD
P07910_50	KSDVEAIFSKYGKIVGCSVHKGFAFVQYVNERNARAAVAGE
P07910_8	XXXXXXXXXXXXXMASNVTNKTDPRSMNSRVFIGNLNTLVV
P07910_89	GEDGRMIAGQVLDINLAAEPKVNRGKAGVKRSAAEMYGSVT
P07910_94	MIAGQVLDINLAAEPKVNRGKAGVKRSAAEMYGSVTEHPSP
P07992_21	MDPGKDKEGVPQPSGPPARKKFVIPLDEDEVPPGVAKPLFR
P07992_243	LMEKLEQDFVSRVTECLTTVKSVNKTDSQTLLTTFGSLEQL
P07992_37	PARKKFVIPLDEDEVPPGVAKPLFRSTQSLPTVDTSAQAAP
P08047_16	XXXXXMSDQDHSMDEMTAVVKIEKGVGGNNGGNGNGGGAFS
P08151_1003	HRAAAPPRLLPPLPTCYGPLKVGGTNPSCGHPEVGRLGGGP
P08195_166	IKVAEDEAEAAAAAKFTGLSKEELLKVAGSPGWVRTRWALL
P08579_111	ISKMRGTFADKEKKKEKKKAKTVEQTATTTNKKPGQGTPNS
P08621_346	PPDDGPPGELGPDGPDGPEEKGRDRDRERRRSHRSERERRR
P08670_104	VDFSLADAINTEFKNTRTNEKVELQELNDRFANYIDKVRFL
P08670_120	RTNEKVELQELNDRFANYIDKVRFLEQQNKILLAELEQLKG
P08670_129	ELNDRFANYIDKVRFLEQQNKILLAELEQLKGQGKSRLGDL
P08670_139	DKVRFLEQQNKILLAELEQLKGQGKSRLGDLYEEEMRELRR
P08670_223	LQSFRQDVDNASLARLDLERKVESLQEEIAFLKKLHEEEIQ
P08670_262	IQELQAQIQEQHVQIDVDVSKPDLTAALRDVRQQYESVAAK
P08670_294	QQYESVAAKNLQEAEEWYKSKFADLSEAANRNNDALRQAKQ
P08670_313	SKFADLSEAANRNNDALRQAKQESTEYRRQVQSLTCEVDAL
P08670_373	VEAANYQDTIGRLQDEIQNMKEEMARHLREYQDLLNVKMAL
P08670_439	SSLNLRETNLDSLPLVDTHSKRTLLIKTVETRDGQVINETS
P08670_445	ETNLDSLPLVDTHSKRTLLIKTVETRDGQVINETSQHHDDL
P08708_103	NYVPEVSALDQEIIEVDPDTKEMLKLLDFGSLSNLQVTQPT
P08729_130	RFLEQQNKLLETKWTLLQEQKSAKSSRLPDIFEAQIAGLRG
P08729_265	VVLSMDNSRSLDLDGIIAEVKAQYEEMAKCSRAEAEAWYQT
P08729_286	AQYEEMAKCSRAEAEAWYQTKFETLQAQAGKHGDDLRNTRN
P08729_296	RAEAEAWYQTKFETLQAQAGKHGDDLRNTRNEISEMNRAIQ
P08729_331	MNRAIQRLQAEIDNIKNQRAKLEAAIAEAEERGELALKDAR
P08758_29	VTDFPGFDERADAETLRKAMKGLGTDEESILTLLTSRSNAQ
P08865_89	ENPADVSVISSRNTGQRAVLKFAAATGATPIAGRFTPGTFT
P09651_179	VDKIVIQKYHTVNGHNCEVRKALSKQEMASASSSQRGRSGS
P09651_183	VIQKYHTVNGHNCEVRKALSKQEMASASSSQRGRSGSGNFG
P09651_3	XXXXXXXXXXXXXXXXXXMSKSESPKEPEQLRKLFIGGLSF
P09651_350	GGNFGGRSSGPYGGGGQYFAKPRNQGGYGGSSSSSSYGSGR
P09651_78	GFVTYATVEEVDAAMNARPHKVDGRVVEPKRAVSREDSQRP
P09651_8	XXXXXXXXXXXXXMSKSESPKEPEQLRKLFIGGLSFETTDE
P09661_172	LKERQEAEKMFKGKRGAQLAKDIARRSKTFNPGAGLPTDKK
P09661_221	VEAIKNAIANASTLAEVERLKGLLQSGQIPGRERRSGPTDD
P09874_192	FRPEYSASQLKGFSLLATEDKEALKKQLPGVKSEGKRKGDE
P09874_203	GFSLLATEDKEALKKQLPGVKSEGKRKGDEVDGVDEVAKKK
P09874_249	DKDSKLEKALKAQNDLIWNIKDELKKVCSTNDLKELLIFNK
P09874_467	KEANIRVVSEDFLQDVSASTKSLQELFLAHILSPWGAEVKA
P09874_486	TKSLQELFLAHILSPWGAEVKAEPVEVVAPRGKSGAALSKK
P09874_512	VVAPRGKSGAALSKKSKGQVKEEGINKSEKRMKLTLKGGAA
P09874_528	KGQVKEEGINKSEKRMKLTLKGGAAVDPDSGLEHSAHVLEK
P09874_748	QILDLSNRFYTLIPHDFGMKKPPLLNNADSVQAKVEMLDNL
P0C1Z6_216	PRDGRRAGNALTPELAPVQIKVEEDFGFEADEALDSSWVSR
P0C671_302	VRKKSQEKKTSLKRTSKTNPKKHGSEEAKRGAADVSSPEAW
P0CJ78_1040	SSCGEGFANTYGLKKHRLAHKAENLGGPGAGAGTLAGKDAX
P0CJ78_802	GGGASSGPERFSCATCGQSFKHFLGLVTHKYVHLVRRTLGC
P0DP91_255	AWEELIRTGQMTPFGTQIPQKQEKKPRKIMLNEASGFEKYL
P10071_438	TSESAVSSTGDPMHNKRSKIKPDEDLPSPGARGQQEQPEGT
P10071_462	DLPSPGARGQQEQPEGTTLVKEEGDKDESKQEPEVIYETNC
P10071_779	TALALQARRNPAGTKWMEHVKLERLKQVNGMFPRLNPILPP
P10073_443	LIRHLRIHSGEKPYQCKVCPKAFAQSSSLIEHQRIHTGEKP
P10074_143	AAGGQSGLGPPASQNVNSHVKEPAGLEEEEVSRTLGLVPRD
P10074_263	GDYMSEPEAVLTRRKSNVIRKPCAAEPALSAGSLAAEPAEN
P10242_480	LESSPRTPTPFKHALAAQEIKYGPLKMLPQTPSHLVEDLQD
P10243_199	HWNSTMRRKVEQEGYLQDGIKSERSSSKLQHKPCAAMDHMQ
P10243_592	PLKIVSQPLAFLEEDIREVLKEETGTDLFLKEEDEPAYKSC
P10243_602	FLEEDIREVLKEETGTDLFLKEEDEPAYKSCKQENTASGKK
P10244_104	GPWTKEEDQKVIELVKKYGTKQWTLIAKHLKGRLGKQCRER
P10244_194	NHWNSTIKRKVDTGGFLSESKDCKPPVYLLLELEDKDGLQS
P10244_197	NSTIKRKVDTGGFLSESKDCKPPVYLLLELEDKDGLQSAQP
P10244_275	EPIGTDLDAVRTPEPLEEFPKREDQEGSPPETSLPYKWVVE
P10244_411	PISPSTEVGGSGIGTPPSVLKRQRKRRVALSPVTENSTSLS
P10244_447	STSLSFLDSCNSLTPKSTPVKTLPFSPSQFLNFWNKQDTLE
P10244_482	KQDTLELESPSLTSTPVCSQKVVVTTPLHRDKTPLHQKHAA
P10244_499	CSQKVVVTTPLHRDKTPLHQKHAAFVTPDQKYSMDNTPHTP
P10244_509	LHRDKTPLHQKHAAFVTPDQKYSMDNTPHTPTPFKNALEKY
P10244_523	FVTPDQKYSMDNTPHTPTPFKNALEKYGPLKPLPQTPHLEE
P10244_533	DNTPHTPTPFKNALEKYGPLKPLPQTPHLEEDLKEVLRSEA
P10244_546	LEKYGPLKPLPQTPHLEEDLKEVLRSEAGIELIIEDDIRPE
P10244_584	RPEKQKRKPGLRRSPIKKVRKSLALDIVDEDVKLMMSTLPK
P10244_596	RSPIKKVRKSLALDIVDEDVKLMMSTLPKSLSLPTTAPSNS
P10244_625	SLSLPTTAPSNSSSLTLSGIKEDNSLLNQGFLQAKPEKAAV
P10244_639	LTLSGIKEDNSLLNQGFLQAKPEKAAVAQKPRSHFTTPAPM
P10244_648	NSLLNQGFLQAKPEKAAVAQKPRSHFTTPAPMSSAWKTVAC
P10809_551	DAAGVASLLTTAEVVVTEIPKEEKDPGMGAMGGMGGGMGGG
P11021_352	MDLFRSTMKPVQKVLEDSDLKKSDIDEIVLVGGSTRIPKIQ
P11142_512	DKSTGKENKITITNDKGRLSKEDIERMVQEAEKYKAEDEKQ
P11387_101	HKDRDKEKRKEEKVRASGDAKIKKEKENGFSSPPQIKDEPE
P11387_103	DRDKEKRKEEKVRASGDAKIKKEKENGFSSPPQIKDEPEDD
P11387_117	SGDAKIKKEKENGFSSPPQIKDEPEDDGYFVPPKEDIKPLK
P11387_134	PQIKDEPEDDGYFVPPKEDIKPLKRPRDEDDADYKPKKIKT
P11387_148	PPKEDIKPLKRPRDEDDADYKPKKIKTEDTKKEKKRKLEEE
P11387_153	IKPLKRPRDEDDADYKPKKIKTEDTKKEKKRKLEEEEDGKL
P11387_158	RPRDEDDADYKPKKIKTEDTKKEKKRKLEEEEDGKLKKPKN
P11387_164	DADYKPKKIKTEDTKKEKKRKLEEEEDGKLKKPKNKDKDKK
P11387_172	IKTEDTKKEKKRKLEEEEDGKLKKPKNKDKDKKVPEPDNKK
P11387_204	KVPEPDNKKKKPKKEEEQKWKWWEEERYPEGIKWKFLEHKG
P11387_336	RKQMSKEEKLKIKEENEKLLKEYGFCIMDNHKERIANFKIE
P11387_549	FLGKDSIRYYNKVPVEKRVFKNLQLFMENKQPEDDLFDRLN
P11387_642	ANRAVAILCNHQRAPPKTFEKSMMNLQTKIDAKKEQLADAR
P11387_700	TKKVVESKKKAVQRLEEQLMKLEVQATDREENKQIALGTSK
P11387_712	QRLEEQLMKLEVQATDREENKQIALGTSKLNYLDPRITVAW
P11388_1075	ILEKIDGKIIIENKPKKELIKVLIQRGYDSDPVKAWKEAQQ
P11388_1114	QQKVPDEEENEESDNEKETEKSDSVTDSGPTFNYLLDMPLW
P11388_1196	EELEAVEAKEKQDEQVGLPGKGGKAKGKKTQMAEVLPSPRG
P11388_1204	KEKQDEQVGLPGKGGKAKGKKTQMAEVLPSPRGQRVIPRIT
P11388_1228	AEVLPSPRGQRVIPRITIEMKAEAEKKNKKKIKNENTEGSP
P11388_1240	IPRITIEMKAEAEKKNKKKIKNENTEGSPQEDGVELEGLKQ
P11388_1259	IKNENTEGSPQEDGVELEGLKQRLEKKQKREPGTKTKKQTT
P11388_1276	EGLKQRLEKKQKREPGTKTKKQTTLAFKPIKKGKKRNPWSD
P11388_1283	EKKQKREPGTKTKKQTTLAFKPIKKGKKRNPWSDSESDRSS
P11388_1286	QKREPGTKTKKQTTLAFKPIKKGKKRNPWSDSESDRSSDES
P11388_1363	TDDEDFVPSDASPPKTKTSPKLSNKELKPQKSVVSDLEADD
P11388_1367	DFVPSDASPPKTKTSPKLSNKELKPQKSVVSDLEADDVKGS
P11388_1373	ASPPKTKTSPKLSNKELKPQKSVVSDLEADDVKGSVPLSSS
P11388_1385	SNKELKPQKSVVSDLEADDVKGSVPLSSSPPATHFPDETEI
P11388_1422	ETEITNPVPKKNVTVKKTAAKSQSSTSTTGAKKRAAPKGTK
P11388_1442	KSQSSTSTTGAKKRAAPKGTKRDPALNSGVSQKPDPAKTKN
P11388_1454	KRAAPKGTKRDPALNSGVSQKPDPAKTKNRRKRKPSTSDDS
P11388_1459	KGTKRDPALNSGVSQKPDPAKTKNRRKRKPSTSDDSDSNFE
P11388_1484	RKRKPSTSDDSDSNFEKIVSKAVTSKKSKGESDDFHMDFDS
P11388_1492	DDSDSNFEKIVSKAVTSKKSKGESDDFHMDFDSAVAPRAKS
P11388_156	YVPALIFGQLLTSSNYDDDEKKVTGGRNGYGAKLCNIFSTK
P11388_157	VPALIFGQLLTSSNYDDDEKKVTGGRNGYGAKLCNIFSTKF
P11388_17	XXXXMEVSPLQPVNENMQVNKIKKNEDAKKRLSVERIYQKK
P11388_261	RRAYDIAGSTKDVKVFLNGNKLPVKGFRSYVDMYLKDKLDE
P11388_352	QIVTKLVDVVKKKNKGGVAVKAHQVKNHMWIFVNALIENPT
P11388_386	ALIENPTFDSQTKENMTLQPKSFGSTCQLSEKFIKAAIGCG
P11388_397	TKENMTLQPKSFGSTCQLSEKFIKAAIGCGIVESILNWVKF
P11388_416	EKFIKAAIGCGIVESILNWVKFKAQVQLNKKCSAVKHNRIK
P11388_418	FIKAAIGCGIVESILNWVKFKAQVQLNKKCSAVKHNRIKGI
P11388_425	CGIVESILNWVKFKAQVQLNKKCSAVKHNRIKGIPKLDDAN
P11388_440	QVQLNKKCSAVKHNRIKGIPKLDDANDAGGRNSTECTLILT
P11388_466	DAGGRNSTECTLILTEGDSAKTLAVSGLGVVGRDKYGVFPL
P11388_480	TEGDSAKTLAVSGLGVVGRDKYGVFPLRGKILNVREASHKQ
P11388_529	NIIKIVGLQYKKNYEDEDSLKTLRYGKIMIMTDQDQDGSHI
P11388_584	LLRHRFLEEFITPIVKVSKNKQEMAFYSLPEFEEWKSSTPN
P11388_599	KVSKNKQEMAFYSLPEFEEWKSSTPNHKKWKVKYYKGLGTS
P11388_614	EFEEWKSSTPNHKKWKVKYYKGLGTSTSKEAKEYFADMKRH
P11388_622	TPNHKKWKVKYYKGLGTSTSKEAKEYFADMKRHRIQFKYSG
P11388_625	HKKWKVKYYKGLGTSTSKEAKEYFADMKRHRIQFKYSGPED
P11388_632	YYKGLGTSTSKEAKEYFADMKRHRIQFKYSGPEDDAAISLA
P11388_639	STSKEAKEYFADMKRHRIQFKYSGPEDDAAISLAFSKKQID
P11388_655	RIQFKYSGPEDDAAISLAFSKKQIDDRKEWLTNFMEDRRQR
P11388_662	GPEDDAAISLAFSKKQIDDRKEWLTNFMEDRRQRKLLGLPE
P11388_676	KQIDDRKEWLTNFMEDRRQRKLLGLPEDYLYGQTTTYLTYN
P11474_189	PLPFPGPFPAGPLAVAGGPRKTAAPVNALVSHLLVVEPEKL
P11474_403	LTLPLLRQTAGKVLAHFYGVKLEGKVPMHKLFLEMLEAMMD
P12004_164	FARICRDLSHIGDAVVISCAKDGVKFSASGELGNGNIKLSQ
P12004_254	PLVVEYKIADMGHLKYYLAPKIEDEEGSXXXXXXXXXXXXX
P12268_195	LEEIMTKREDLVVAPAGITLKEANEILQRSKKGKLPIVNED
P12268_208	APAGITLKEANEILQRSKKGKLPIVNEDDELVAIIARTDLK
P12268_438	DAMDKHLSSQNRYFSEADKIKVAQGVSGAVQDKGSIHKFVP
P12757_489	SRELCSRLDASISNNSTSKRKSESATCNLVRDINKVGIGLV
P12757_50	KKMITDIHANGKTINKVPTVKKEHLDDYGEAPVETDGEHVK
P12757_527	GLVAAASSPLLVKDVICEDDKGKIMEEVMRTYLKQQEKLNL
P12757_70	KKEHLDDYGEAPVETDGEHVKRTCTSVPETLHLNPSLKHTL
P12956_287	IVISVGIYNLVQKALKPPPIKLYRETNEPVKTKTRTFNTST
P12956_317	KTKTRTFNTSTGGLLLPSDTKRSQIYGSRQIILEKEETEEL
P12956_556	PEGKVTKRKHDNEGSGSKRPKVEYSEEELKTHISKGTLGKF
P13010_195	SGDRGDGPFRLGGHGPSFPLKGITEQQKEGLEIVKMVMISL
P13010_532	IWNMLNPPAEVTTKSQIPLSKIKTLFPLIEAKKKDQVTAQE
P13010_534	NMLNPPAEVTTKSQIPLSKIKTLFPLIEAKKKDQVTAQEIF
P13010_566	DQVTAQEIFQDNHEDGPTAKKLKTEQGGAHFSVSSLAEGSV
P13010_568	VTAQEIFQDNHEDGPTAKKLKTEQGGAHFSVSSLAEGSVTS
P13010_669	FSEEQRFNNFLKALQEKVEIKQLNHFWEIVVQDGITLITKE
P13010_688	IKQLNHFWEIVVQDGITLITKEEASGSSVTAEEAKKFLAPK
P13056_250	TRSTGLLDSGMFMNIHPSGVKTESAVLMTSDKAESCQGDLS
P13056_588	LFFKGLIGNIRIDSVIPHILKMEPADYNSQIIGHSIXXXXX
P13631_172	EVGMSKEAVRNDRNKKKKEVKEEGSPDSYELSPQLEELITK
P13631_401	MKITDLRGISTKGAERAITLKMEIPGPMPPLIREMLENPEM
P13682_117	LAKSEILETHGTMNFLGAETKNLQLLVPKTEICEEAEKPLI
P13682_125	THGTMNFLGAETKNLQLLVPKTEICEEAEKPLIISERIQKA
P13682_144	PKTEICEEAEKPLIISERIQKADPQGPELGEACEKGNMLKR
P13682_158	ISERIQKADPQGPELGEACEKGNMLKRQRIKREKKDFRQVI
P13682_189	REKKDFRQVIVNDCHLPESFKEEENQKCKKSGGKYSLNSGA
P13682_20	XMTAELREAMALAPWGPVKVKKEEEEEENFPGQASSQQVHS
P13682_21	MTAELREAMALAPWGPVKVKKEEEEEENFPGQASSQQVHSE
P13682_214	QKCKKSGGKYSLNSGAVKNPKTQLGQKPFTCSVCGKGFSQS
P13682_276	GKAFIQSANLVVHQRIHTGQKPYVCSKCGKAFTQSSNLTVH
P13682_99	TQEAPAASTLGSYSLPGTLAKSEILETHGTMNFLGAETKNL
P13995_50	LAAVRNEAVVISGRKLAQQIKQEVRQEVEEWVASGNKRPHL
P14316_137	RPSKKGKKPKTEKEDKVKHIKQEPVESSLGLSNGVSDLSPE
P14316_260	PSDEESAEGRPHWRKRNIEGKQYLSNMGTRGSYLLPGMASF
P14618_115	TESFASDPILYRPVAVALDTKGPEIRTGLIKGSGTAEVELK
P14618_266	RKASDVHEVRKVLGEKGKNIKIISKIENHEGVRRFDEILEA
P14618_270	DVHEVRKVLGEKGKNIKIISKIENHEGVRRFDEILEASDGI
P14866_136	ADLVEALQEFGPISYVVVMPKKRQALVEFEDVLGACNAVNY
P14866_302	TWDYTNPNLSGQGDPGSNPNKRQRQPPLLGDHPAEYGGPHG
P14866_568	EWESKSDALETLGFLNHYQMKNPNGPYPYTLKLCFSTAQHA
P14866_59	GGGGGGGRYYGGGSEGGRAPKRLKTDNAGDQHGGGGGGGGG
P14866_62	GGGGRYYGGGSEGGRAPKRLKTDNAGDQHGGGGGGGGGAGA
P15408_104	PLPGLASVPGHMALPRPGVIKTIGTTVGRRRRDEQLSPEEE
P15408_222	PAPGLQPMRSGGGSVGAVVVKQEPLEEDSPSSSSAGLDKAQ
P15408_240	VVKQEPLEEDSPSSSSAGLDKAQRSVIKPISIAGGFYGEEP
P15408_35	GSSGSPAHAESYSSGGGGQQKFRVDMPGSGSAFIPTINAIT
P15559_250	DLNFQAGFLMKKEVQDEEKNKKFGLSVGHHLGKSIPTDNQI
P15559_251	LNFQAGFLMKKEVQDEEKNKKFGLSVGHHLGKSIPTDNQIK
P15622_125	DHTTACTQQDSLSCPWECETKGESQNTDLSPKPLISEQTVI
P15622_136	LSCPWECETKGESQNTDLSPKPLISEQTVILGKTPLGRIDQ
P15622_148	SQNTDLSPKPLISEQTVILGKTPLGRIDQENNETKQSFCLS
P15622_162	QTVILGKTPLGRIDQENNETKQSFCLSPNSVDHREVQVLSQ
P15622_225	GKCFGRSSHLLQHQRIHTGEKPYVCSVCGKAFSQSSVLSKH
P15622_421	GKTFSHRSTLMNHERIHTEEKPYACYECGKAFVQHSHLIQH
P15880_275	LWKETVFTKSPYQEFTDHLVKTHTRVSVQRTQAPAVATTXX
P15923_498	PPDSYSGLGRAGATAAASEIKREEKEDEENTSAADHSEEEK
P15923_625	QVRERNLNPKAACLKRREEEKVSGVVGDPQMVLSAPHPGLS
P17020_253	GEASFMCDDCGKTFSQNSVLKNRHRSHMSEKAYQCSECGKA
P17027_157	EQPSGCTGLGKSISFDTKLVKHEIINSEERPFKCEELVEPF
P17028_147	LEDLESELDDPGQPVSLRRRKREVLVEDMVSQEEAQGLPSS
P17028_177	SQEEAQGLPSSELDAVENQLKWASWELHSLRHCDDDGRTEN
P17028_22	SAQSVEEDSILIIPTPDEEEKILRVKLEEDPDGEEGSSIPW
P17028_236	PGTLNMGVPQIFKYGETCFPKGRFERKRNPSRKKQHICDEC
P17028_27	EEDSILIIPTPDEEEKILRVKLEEDPDGEEGSSIPWNHLPD
P17028_277	GKHFSQGSALILHQRIHSGEKPYGCVECGKAFSRSSILVQH
P17028_286	LILHQRIHSGEKPYGCVECGKAFSRSSILVQHQRVHTGEKP
P17028_361	GKSYSQSSNLFRHQRRHNAEKLLNVVKVXXXXXXXXXXXXX
P17028_367	SSNLFRHQRRHNAEKLLNVVKVXXXXXXXXXXXXXXXXXXX
P17029_181	DPVQESSSFDLHHEATQSHFKHSSRKPRLLQSRALPAAHIP
P17029_228	SPRDQAMASALFTADSQAMVKIEDMAVSLILEEWGCQNLAR
P17029_27	REATGLSPQAAQEKDGIVIVKVEEEDEEDHMWGQDSTLQDT
P17029_280	YGSAFPQGGENRNENEESTSKAETSEDSASRGETTGRSQKE
P17029_299	SKAETSEDSASRGETTGRSQKEFGEKRDQEGKTGERQQKNP
P17029_304	SEDSASRGETTGRSQKEFGEKRDQEGKTGERQQKNPEEKTR
P17029_339	PEEKTRKEKRDSGPAIGKDKKTITGERGPREKGKGLGRSFS
P17029_375	GRSFSLSSNFTTPEEVPTGTKSHRCDECGKCFTRSSSLIRH
P17029_412	LIRHKIIHTGEKPYECSECGKAFSLNSNLVLHQRIHTGEKP
P17029_440	LVLHQRIHTGEKPHECNECGKAFSHSSNLILHQRIHSGEKP
P17029_478	EKPYECNECGKAFSQSSDLTKHQRIHTGEKPYECSECGKAF
P17029_560	ARERASEYSPASLDAFGAFLKSCVXXXXXXXXXXXXXXXXX
P17035_428	EKPYKCKVCDKAFAYNSYLAKHSIIHTGEKPYKCNECGKVF
P17035_89	FHTGTLQRQASHHIGDFCFQKIEKDIHGFQFQWKEDETNDH
P17036_125	DTRSHGVLLGRFQKDISQGLKFKEAYEREVSLKRPLGNSPG
P17036_151	EREVSLKRPLGNSPGERLNRKMPDFGQVTVEEKLTPRGERS
P17036_163	SPGERLNRKMPDFGQVTVEEKLTPRGERSEKYNDFGNSFTV
P17036_173	PDFGQVTVEEKLTPRGERSEKYNDFGNSFTVNSNLISHQRL
P17036_422	GKAFRYSSALVRHQRIHTGEKPLNGIGMSKSSLRVTTELNI
P17036_431	LVRHQRIHTGEKPLNGIGMSKSSLRVTTELNIRESTXXXXX
P17096_15	XXXXXXMSESSSKSSQPLASKQEKDGTEKRGRGRPRKQPPV
P17097_101	KTDSTIRTENEQACEDMDILKSESYGTVVRISPQDFPQNPG
P17097_279	FRLCSQLNQHQRIHTGEKPFKCTECGKAFRLSSKLIQHQRI
P17097_292	HTGEKPFKCTECGKAFRLSSKLIQHQRIHTGEKPYRCEECG
P17097_393	QSSTLAQHQRMHTGEKAQILKASDSPSLVAHQRIHAVEKPF
P17097_81	EEPWVLDLQGAEGTEAPRTSKTDSTIRTENEQACEDMDILK
P17098_174	NNLKQLEFGLKEAPVQDQGYKTLRLRENCVLSSSPNPFPEI
P17098_249	GENSDCHRDSSQAIPITELTKSQVQDKPYKCTDCGKSFNHN
P17098_441	GEKPFECRQRLIFEQTPALTKHEWTEALGCDPPLSQDERTH
P17098_545	AGGAKAGQPESRALALFDIQKIMQEKNPVHVIGVEEPSVGA
P17275_141	AGGAGGGVTEEQEGFADGFVKALDDLHKMNHVTPPNVSLGA
P17275_240	PPFAGGHPAQLGLGRGASTFKEEPQTVPEARSRDATPPVSP
P17275_33	DSYTATGYGRAPGGLSLHDYKLLKPSLAVNLADPYRSLKAP
P17275_343	QLKQKVMTHVSNGCQLLLGVKGHAFXXXXXXXXXXXXXXXX
P17275_36	TATGYGRAPGGLSLHDYKLLKPSLAVNLADPYRSLKAPGAR
P17275_4	XXXXXXXXXXXXXXXXXMCTKMEQPFYHDDSYTATGYGRAP
P17275_81	EGGGGGSYFSGQGSDTGASLKLASSELERLIVPNSNGVITT
P17482_117	TWLEPAPRGEAAPGQGQAAVKAEPLLGAPGELLKQGTPEYS
P17676_133	QHHDFLSDLFSDDYGGKNCKKPAEYGYVSLGRLGAAKGALH
P17676_174	PGCFAPLHPPPPPPPPPAELKAEPGFEPADCKRKEEAGAPG
P17676_185	PPPPPPAELKAEPGFEPADCKRKEEAGAPGGGAGMAAGFPY
P17676_187	PPPPAELKAEPGFEPADCKRKEEAGAPGGGAGMAAGFPYAL
P17676_260	DAKAPPTACYAGAAPAPSQVKSKAKKTVDKHSDEYKIRRER
P17676_262	KAPPTACYAGAAPAPSQVKSKAKKTVDKHSDEYKIRRERNN
P17676_332	RLQKKVEQLSRELSTLRNLFKQLPEPLLASSGHCXXXXXXX
P17844_32	RDRGFGAPRFGGSRAGPLSGKKFGNPGEKLVKKKWNLDELP
P17844_340	CHDVEKDEKLIRLMEEIMSEKENKTIVFVETKRRCDELTRK
P17844_343	VEKDEKLIRLMEEIMSEKENKTIVFVETKRRCDELTRKMRR
P17844_388	AMGIHGDKSQQERDWVLNEFKHGKAPILIATDVASRGLDVE
P17844_391	IHGDKSQQERDWVLNEFKHGKAPILIATDVASRGLDVEDVK
P17844_411	KAPILIATDVASRGLDVEDVKFVINYDYPNSSEDYIHRIGR
P17844_437	DYPNSSEDYIHRIGRTARSTKTGTAYTFFTPNNIKQVSDLI
P17844_45	RAGPLSGKKFGNPGEKLVKKKWNLDELPKFEKNFYQEHPDL
P17844_451	RTARSTKTGTAYTFFTPNNIKQVSDLISVLREANQAINPKL
P17844_470	IKQVSDLISVLREANQAINPKLLQLVEDRGSGRSRGRGGMK
P17844_523	GGFNTFRDRENYDRGYSSLLKRDFGAKTQNGVYSAANYTNG
P17844_53	KFGNPGEKLVKKKWNLDELPKFEKNFYQEHPDLARRTAQEV
P18146_305	SLTPLSTIKAFATQSGSQDLKALNTSYQSQLIKPSRMRKYP
P18583_2055	RKRSRSSERGRSPKRLTDLDKAQLLEIAKANAAAMCAKAGV
P18583_2092	KAGVPLPPNLKPAPPPTIEEKVAKKSGGATIEELTEKCKQI
P18583_2149	SDEEEEEPPFYHHPFKLSEPKPIFFNLNIAAAKPTPPKSQV
P18583_64	NQAGDAAASARSLPNEEIVQKIEEVLSGVLDTELRYKPDLK
P18615_78	TATATEQAKQLVKSGAISAIKAETKNSGFKRSRTLEGKLKD
P18615_82	TEQAKQLVKSGAISAIKAETKNSGFKRSRTLEGKLKDPEKG
P18846_208	TSLPQTVVMTSPVTLTSQTTKTDDPQLKREIRLMKNREAAR
P18846_215	VMTSPVTLTSQTTKTDDPQLKREIRLMKNREAARECRRKKK
P18847_175	VRAQNGRTPEDERNLFIQQIKEGTLQSXXXXXXXXXXXXXX
P18847_78	MSSALESVTVSDRPLGVSITKAEVAPEEDERKKRRRERNKI
P18848_259	RGSPNRSLPSPGVLCGSARPKPYDPPGEKMVAAKVKGEKLD
P18848_267	PSPGVLCGSARPKPYDPPGEKMVAAKVKGEKLDKKLKKMEQ
P18848_272	LCGSARPKPYDPPGEKMVAAKVKGEKLDKKLKKMEQNKTAA
P18848_53	LLDDYLEVAKHFKPHGFSSDKAKAGSSEWLAVDGLVSPSNN
P18850_87	MPWESDIWDINNQICTVKDIKAEPQPLSPASSSYSVSSPRS
P18887_176	DEAEAPSQKVTVTKLGQFRVKEEDESANSLRPGALFFSRIN
P19338_297	PGKRKKEMAKQKAAPEAKKQKVEGTEPTTAFNLFVGNLNFN
P19338_324	TTAFNLFVGNLNFNKSAPELKTGISDVFAKNDLAVVDVRIG
P19338_370	GYVDFESAEDLEKALELTGLKVFGNEIKLEKPKGKDSKKER
P19338_377	AEDLEKALELTGLKVFGNEIKLEKPKGKDSKKERDARTLLA
P19338_513	LSYSATEETLQEVFEKATFIKVPQNQNGKSKGYAFIEFASF
P19338_577	LQGPRGSPNARSQPSKTLFVKGLSEDTTEETLKESFDGSVR
P19338_589	QPSKTLFVKGLSEDTTEETLKESFDGSVRARIVTDRETGSS
P19338_624	RETGSSKGFGFVDFNSEEDAKAAKEAMEDGEIDGNKVTLDW
P19388_81	LVAHNDDPTDQMFVFFPEEPKVGIKTIKVYCQRMQEENITR
P19532_339	SNSCPAELPNIKREISETEAKALLKERQKKDNHNLIERRRR
P19544_444	KFARSDELVRHHNMHQRNMTKLQLALXXXXXXXXXXXXXXX
P19793_4	XXXXXXXXXXXXXXXXXMDTKHFLPLDFSTQVNSSLTSPTG
P19838_325	VHRQFAIVFKTPKYKDINITKPASVFVQLRRKSDLETSEPK
P20042_102	KKKTKKIFDIDEAEEGVKDLKIESDVQEPTEPEDDLDIMLG
P20273_288	SSSNPEYTTVSWLKDGTSLKKQNTFTLNLREVTKDQSGKYC
P20700_102	YETELADARRALDDTARERAKLQIELGKCKAEHDQLLLNYA
P20700_123	LQIELGKCKAEHDQLLLNYAKKESDLNGAQIKLREYEAALN
P20700_145	ESDLNGAQIKLREYEAALNSKDAALATALGDKKSLEGDLED
P20700_157	EYEAALNSKDAALATALGDKKSLEGDLEDLKDQIAQLEASL
P20700_181	GDLEDLKDQIAQLEASLAAAKKQLADETLLKVDLENRCQSL
P20700_241	RKHETRLVEVDSGRQIEYEYKLAQALHEMREQHDAQVRLYK
P20700_261	KLAQALHEMREQHDAQVRLYKEELEQTYHAKLENARLSSEM
P20700_271	EQHDAQVRLYKEELEQTYHAKLENARLSSEMNTSTVNSARE
P20700_312	ELMESRMRIESLSSQLSNLQKESRACLERIQELEDLLAKEK
P20700_330	LQKESRACLERIQELEDLLAKEKDNSRRMLTDKEREMAEIR
P20700_532	DLIWKNQNSWGTGEDVKVILKNSQGEEVAQRSTVFKTTIPE
P20700_547	VKVILKNSQGEEVAQRSTVFKTTIPEEEEEEEEAAGVVVEE
P20810_32	SQQMEGPHLPNKKKHKKQAVKTEPEKKSQSTKLSVVHEKKS
P21127_641	MWSVGCIFGELLTQKPLFPGKSEIDQINKVFKDLGTPSEKI
P21266_54	EKRYTCGEAPDYDRSQWLDVKFKLDLDFPNLPYLLDGKNKI
P21266_73	VKFKLDLDFPNLPYLLDGKNKITQSNAILRYIARKHNMCGE
P21291_91	YGYGQGAGTLSTDKGESLGIKHEEAPGHRPTTNPNASKFAQ
P21333_299	LNPKKARAYGPGIEPTGNMVKKRAEFTVETRSAGQGEVLVY
P21675_549	SKKESSLKKSRILLGKTGVIKEEPQQNMSQPEVKDPWNLSN
P21675_562	LGKTGVIKEEPQQNMSQPEVKDPWNLSNDEYYYPKQQGLRG
P22087_102	SGKNVMVEPHRHEGVFICRGKEDALVTKNLVPGESVYGEKR
P22087_109	EPHRHEGVFICRGKEDALVTKNLVPGESVYGEKRVSISEGD
P22087_131	LVPGESVYGEKRVSISEGDDKIEYRAWNPFRSKLAAAILGG
P22087_143	VSISEGDDKIEYRAWNPFRSKLAAAILGGVDQIHIKPGAKV
P22087_158	NPFRSKLAAAILGGVDQIHIKPGAKVLYLGAASGTTVSHVS
P22087_84	FHSGGNRGRGRGGKRGNQSGKNVMVEPHRHEGVFICRGKED
P22415_306	KNKNLLLRAQLRHHGLEVVIKNDSNXXXXXXXXXXXXXXXX
P22626_104	HSIDGRVVEPKRAVAREESGKPGAHVTVKKLFVGGIKEDTE
P22626_112	EPKRAVAREESGKPGAHVTVKKLFVGGIKEDTEEHHLRDYF
P22626_120	EESGKPGAHVTVKKLFVGGIKEDTEEHHLRDYFEEYGKIDT
P22626_137	GGIKEDTEEHHLRDYFEEYGKIDTIEIITDRQSGKKRGFGF
P22626_152	FEEYGKIDTIEIITDRQSGKKRGFGFVTFDDHDPVDKIVLQ
P22626_168	QSGKKRGFGFVTFDDHDPVDKIVLQKYHTINGHNAEVRKAL
P22626_173	RGFGFVTFDDHDPVDKIVLQKYHTINGHNAEVRKALSRQEM
P22626_186	VDKIVLQKYHTINGHNAEVRKALSRQEMQEVQSSRSGRGGN
P22626_22	EKTLETVPLERKKREKEQFRKLFIGGLSFETTEESLRNYYE
P23025_145	TCDNCRDADDKHKLITKTEAKQEYLLKDCDLEKREPPLKFI
P23025_63	LAARPYSATAAAATGGMANVKAAPKIIDTGGGFILEEEEEE
P23025_86	PKIIDTGGGFILEEEEEEEQKIGKVVHQPGPVMEFDYVICE
P23246_271	YHQQHHQGPPPGGPGGRSEEKISDSEGFKANLSLLRRPGEK
P23246_279	PPPGGPGGRSEEKISDSEGFKANLSLLRRPGEKTYTQRCRL
P23246_338	AKYGEPGEVFINKGKGFGFIKLESRALAEIAKAELDDTPMR
P23396_214	PTGKIGPKKPLPDHVSIVEPKDEILPTTPISEQKGGKPEPP
P23396_230	IVEPKDEILPTTPISEQKGGKPEPPAMPQPVPTAXXXXXXX
P23497_241	TTSDKDDSLGSQQTNEQCAQKAEPTESCEQIAVQVNNGDAG
P23497_300	HNHGIQINSCSVRLVDIKKEKPFSNSKVECQAQARTHHNQA
P23497_306	INSCSVRLVDIKKEKPFSNSKVECQAQARTHHNQASDIIVI
P23497_366	SAPRSEPVINNDNPLESNDEKEGQEATCSRPQIVPEPMDFR
P23497_387	EGQEATCSRPQIVPEPMDFRKLSTFRESFKKRVIGQDHDFS
P23497_594	GRKANTRPLKRRRKRGPRIPKDENINFKQSELPVTCGEVKG
P23528_132	KSKMIYASSKDAIKKKLTGIKHELQANCYEEVKDRCTLAEK
P23588_343	RDDRGPPQRPKLNLKPRSTPKEDDSSASTSQSTRAASIFGG
P23769_389	VCNACGLYYKLHNVNRPLTMKKEGIQTRNRKMSNKSKKSKK
P24278_142	TVQSSNLYGIQISTTQKTVVKQGLEVKEAPSSNSGNRAAVQ
P24278_148	LYGIQISTTQKTVVKQGLEVKEAPSSNSGNRAAVQGDHPQL
P24278_198	DGTADQQRACPATQALEEHQKPPVSIKQERCDPESVISQSH
P24278_204	QRACPATQALEEHQKPPVSIKQERCDPESVISQSHPSPSSE
P24278_303	HPLNENSEALECRRLSSFIVKENEQQPDHTNRGTTEPLQIS
P24278_330	DHTNRGTTEPLQISQVSLISKDTEPVELNCNFSFSRKRKMS
P24278_405	GNALAQRFQPYCDSWSDVSLKSSRLSQEHLDLPCALESELT
P24534_147	ESKKAKKPALVAKSSILLDVKPWDDETDMAKLEECVRSIQA
P25490_182	GGSSSSGGGRVKKGGGKKSGKKSYLSGGAGAAGGGGADPGN
P25490_183	GSSSSGGGRVKKGGGKKSGKKSYLSGGAGAAGGGGADPGNK
P25490_208	GGAGAAGGGGADPGNKKWEQKQVQIKTLEGEFSVTMWSSDE
P25490_230	VQIKTLEGEFSVTMWSSDEKKDIDHETVVEEQIIGENSPPD
P25490_286	PGIDLSDPKQLAEFARMKPRKIKEDDAPRTIACPHKGCTKM
P25490_288	IDLSDPKQLAEFARMKPRKIKEDDAPRTIACPHKGCTKMFR
P25490_409	GCNKKFAQSTNLKSHILTHAKAKNNQXXXXXXXXXXXXXXX
P25490_411	NKKFAQSTNLKSHILTHAKAKNNQXXXXXXXXXXXXXXXXX
P26358_1609	GLEIKLCMLAKARESASAKIKEEEAAKDXXXXXXXXXXXXX
P26358_259	EKEEKRLRSQTKEPTPKQKLKEEPDREARAGVQADEDEDGD
P26368_15	XXXXXXMSDFDEFERQLNENKQERDKENRHRKRSHSRSRSR
P26368_70	DQRSASRDRRRRSKPLTRGAKEEHGGLIRSPRHEKKKKVRK
P26373_123	RNKSTESLQANVQRLKEYRSKLILFPRKPSAPKKGDSSAEE
P26373_145	ILFPRKPSAPKKGDSSAEELKLATQLTGPVMPVRNVYKKEK
P26373_174	VMPVRNVYKKEKARVITEEEKNFKAFASLRMARANARLFGI
P26373_177	VRNVYKKEKARVITEEEKNFKAFASLRMARANARLFGIRAK
P26599_218	DVLHQIFSKFGTVLKIITFTKNNQFQALLQYADPVSAQHAK
P26599_65	KKFKGDSRSAGVPSRVIHIRKLPIDVTEGEVISLGLPFGKV
P26641_285	ECEQALAAEPKAKDPFAHLPKSTFVLDEFKRKYSNEDTLSV
P27348_49	VTEQGAELSNEERNLLSVAYKNVVGGRRSAWRVISSIEQKT
P27540_58	QRAIKRRPGLDFDDDGEGNSKFLRCDDDQMSNDKERFARSD
P27635_175	AKFKFPGRQKIHISKKWGFTKFNADEFEDMVAEKRLIPDGC
P27816_838	STGPSSRSPSTLLPKKPTAIKTEGKPAEVKKMTAKSVPADL
P28290_360	DQKSQKIMKKKESSSMLATVKEEVSGSSAAVTENADSDRIS
P28290_808	MEHDGQSLVKSTIFISPSSVKKEEAPQSEAPRVEECHHGRT
P28324_167	YSSFTLNSLNSSNVKLFKLIKTENPAEKLAEKKSPQEPTPS
P28340_574	KVVSQLLRQAMHEGLLMPVVKSEGGEDYTGATVIEPLKGYY
P28370_662	LDSIVIQQGRLIDQQSNKLAKEEMLQMIRHGATHVFASKES
P28370_728	QKMGESSLRNFRMDIEQSLYKFEGEDYREKQKLGMVEWIEP
P28370_750	EGEDYREKQKLGMVEWIEPPKRERKANYAVDAYFREALRVS
P28698_723	HRREKPFACQDCGRRFHQSTKLIQHQRVHSAEXXXXXXXXX
P29374_481	EIELKSPRGRRRIARDVNSIKKEIEEEKTEDKLKDNDTENK
P29374_513	LKDNDTENKDVDDDYETAEKKENELLLGRKNTPKQKEKKIK
P29374_718	SDSETEDALEKNLINEELSLKDELEKNENLNDDKLDEENPK
P29374_738	KDELEKNENLNDDKLDEENPKISAHILKENDRTQMQPLETL
P29374_759	ISAHILKENDRTQMQPLETLKLEVGENEQIVQIFGNKMEKT
P29375_1007	FLPNVLSLKEALQKAREWTAKVEAIQSGSNYAYLEQLESLS
P29375_191	LFQSGVSLMGVQMPNLDLKEKVEPEVLSTDTQTSPEPGTRM
P29401_352	SDRIIALDGDTKNSTFSEIFKKEHPDRFIECYIAEQNMVSI
P29590_160	CFECEQLLCAKCFEAHQWFLKHEARPLAELRNQSVREFLDG
P29590_380	RQEEPQSLQAAVRTDGFDEFKVRLQDLSSCITQGKDAAVSK
P29590_394	DGFDEFKVRLQDLSSCITQGKDAAVSKKASPEAASTPRDPI
P29590_401	VRLQDLSSCITQGKDAAVSKKASPEAASTPRDPIDVDLPEE
P29590_460	MAVVQSVPGAHPVPVYAFSIKGPSYGEDVSNTTTAQKRKCS
P29590_476	AFSIKGPSYGEDVSNTTTAQKRKCSQTQCPRKVIKMESEEG
P29590_478	SIKGPSYGEDVSNTTTAQKRKCSQTQCPRKVIKMESEEGKE
P29590_487	DVSNTTTAQKRKCSQTQCPRKVIKMESEEGKEARLARSSPE
P29590_490	NTTTAQKRKCSQTQCPRKVIKMESEEGKEARLARSSPEQPR
P29590_497	RKCSQTQCPRKVIKMESEEGKEARLARSSPEQPRPSTSKAV
P29590_65	APASEEEFQFLRCQQCQAEAKCPKLLPCLHTLCSGCLEASG
P30050_40	GEVGATSALAPKIGPLGLSPKKVGDDIAKATGDWKGLRITV
P30085_73	IEKYIKEGKIVPVEITISLLKREMDQTMAANAQKNKFLIDG
P30414_1057	QESKEKKVSENNETIKDNILKTEKSSEEDLSGKHDTVTVSS
P30414_1163	EETSPLGNARLDTPDINIVLKQDMATEHPQAEVVKQESSMS
P30414_1177	DINIVLKQDMATEHPQAEVVKQESSMSESKVLGEVGKQDSS
P30414_1216	SSSASLASAGESTGKKEVAEKSQINLIDKKWKPLQGVGNLA
P30414_1225	GESTGKKEVAEKSQINLIDKKWKPLQGVGNLAAPNAATSSA
P30414_1258	PNAATSSAVEVKVLTTVPEMKPQGLRIEIKSKNKVRPGSLF
P30414_323	VVTAEPEPKIPDVAPIVSDQKPSVSKSGRKIKGRGTIRYHT
P30414_578	GHRKRASKSPRKTASQLSENKPVKTEPLRATMAQNENVVVQ
P30414_581	KRASKSPRKTASQLSENKPVKTEPLRATMAQNENVVVQPVV
P30414_639	WKPGQKPWKPSYERIQEMKAKTTHLLPIQSTYSLANIKETG
P30414_656	MKAKTTHLLPIQSTYSLANIKETGSSSSYHKREKNSESDQS
P30414_666	IQSTYSLANIKETGSSSSYHKREKNSESDQSTYSKYSDRSS
P31153_228	QHDEEVCLDEMRDALKEKVIKAVVPAKYLDEDTIYHLQPSG
P31153_234	CLDEMRDALKEKVIKAVVPAKYLDEDTIYHLQPSGRFVIGG
P31942_6	XXXXXXXXXXXXXXXMDWVMKHNGPNDASDGTVRLRGLPFG
P31942_67	TLTMDYQGRSTGEAFVQFASKEIAENALGKHKERIGHRYIE
P31943_35	VRGLPWSCSADEVQRFFSDCKIQNGAQGIRFIYTREGRPSG
P31943_87	VKLALKKDRETMGHRYVEVFKSNNVEMDWVLKHTGPNSPDT
P31943_98	MGHRYVEVFKSNNVEMDWVLKHTGPNSPDTANDGFVRLRGL
P31948_123	ANNPQLKEGLQNMEARLAERKFMNPFNMPNLYQKLESDPRT
P31948_210	MDEEEEIATPPPPPPPKKETKPEPMEEDLPENKKQALKEKE
P32242_344	AAAASSAWKLNFNSPDCLDYKDQASWRFQVLXXXXXXXXXX
P33176_213	AVTNMNEHSSRSHSIFLINVKQENTQTEQKLSGKLYLVDLA
P33991_439	IHYRKTDAKRLHGLDEEAEQKLFSEKRVELLKELSRKPDIY
P33991_798	TGIVDISILTTGMSATSRKRKEELAEALKKLILSKGKTPAL
P33993_15	XXXXXXMALKDYALEKEKVKKFLQEFYQDDELGKKQFKYGN
P33993_28	LEKEKVKKFLQEFYQDDELGKKQFKYGNQLVRLAHREQVAL
P35221_57	TTLVNTNSKGPSNKKRGRSKKAHVLAASVEQATENFLEKGD
P35221_797	LAYLQRIALYCHQLNICSKVKAEVQNLGGELVVSGVDSAMS
P35227_51	IVECLHSFCKTCIVRYLETNKYCPMCDVQVHKTRPLLSIRS
P35227_88	SIRSDKTLQDIVYKLVPGLFKDEMKRRRDFYAAYPLTEVPN
P35251_50	DEETLKAKKGIKEIKVNSSRKEDDFKQKQPSKKKRIIYDSD
P35637_334	NKKTGQPMINLYTDRETGKLKGEATVSFDDPPSAKAAIDWF
P35658_1538	LEEQQSAQLPQAPPQTSDSVKKEPVLAQPAVSNSGTAASST
P36508_24	LGLHTVTLSDGTTAYVQQAVKGEKLLEGQVIQLEDGTTAYI
P36578_239	KAFRNIPGITLLNVSKLNILKLAPGGHVGRFCIWTESAFRK
P36578_327	KKIHRRVLKKNPLKNLRIMLKLNPYAKTMRRNTILRQARNH
P37275_186	FSQLLTCPYCDRGYKRFTSLKEHIKYRHEKNEDNFSCSLCS
P37275_195	CDRGYKRFTSLKEHIKYRHEKNEDNFSCSLCSYTFAYRTQL
P37275_307	ISSKKCISLIPVNGRPRTGLKTSQCSSPSLSASPGSPTRPQ
P37275_331	CSSPSLSASPGSPTRPQIRQKIENKPLQEQLSVNQIKTEPV
P37275_335	SLSASPGSPTRPQIRQKIENKPLQEQLSVNQIKTEPVDYEF
P37275_347	QIRQKIENKPLQEQLSVNQIKTEPVDYEFKPIVVASGINCS
P37275_439	AVDGNVIRQVLENNQANLASKEQETINASPIQQGGHSVISA
P37275_493	IIINYSLEQPSQLQVVPQNLKKENPVATNSCKSEKLPEDLT
P37275_504	QLQVVPQNLKKENPVATNSCKSEKLPEDLTVKSEKDKSFEG
P37275_515	ENPVATNSCKSEKLPEDLTVKSEKDKSFEGGVNDSTCLLCD
P37275_548	DSTCLLCDDCPGDINALPELKHYDLKQPTQPPPLPAAEAEK
P37275_553	LCDDCPGDINALPELKHYDLKQPTQPPPLPAAEAEKPESSV
P37275_774	SVYQNSVYSVQEEPLNLSCAKKEPQKDSCVTDSEPVVNVIP
P37802_171	FPKKSKENPRNFSDNQLQEGKNVIGLQMGTNRGASQAGMTG
P38159_22	VEADRPGKLFIGGLNTETNEKALEAVFGKYGRIVEVLLMKD
P38159_80	ADAKDAARDMNGKSLDGKAIKVEQATKPSFESGRRGPPPPP
P38159_86	ARDMNGKSLDGKAIKVEQATKPSFESGRRGPPPPPRSRGPP
P38398_1079	NEIGSSDENIQAELGRNRGPKLNAMLRLGVLQPEVYKQSLP
P38398_109	IICAFQLDTGLEYANSYNFAKKENNSPEHLKDEVSIIQSMG
P38398_301	SSLQHENSSLLLTKDRMNVEKAEFCNKSKQPGLARSQHNRW
P38398_339	NRWAGSKETCNDRRTPSTEKKVDLNADPLCERKEWNKQKLP
P38398_443	SGSSEKIDLLASDPHEALICKSERVHSKSVESNIEDKIFGK
P38398_459	ALICKSERVHSKSVESNIEDKIFGKTYRKKASLPNLSHVTE
P38398_519	TNKLKRKRRPTSGLHPEDFIKKADLAVQKTPEMINQGTNQT
P38398_583	QNEKNPNPIESLEKESAFKTKAEPISSSISNMELELNIHNS
P38398_654	PNCTELQIDSCSSSEEIKKKKYNQMPVRHSRNLQLMEGKEP
P38398_734	NTSELKEFVNPSLPREEKEEKLETVKVSNNAEDPKDLMLSG
P38398_739	KEFVNPSLPREEKEEKLETVKVSNNAEDPKDLMLSGERVLQ
P38398_918	KVTFECEQKEENQGKNESNIKPVQTVNITAGFPVVGQKDKP
P38398_987	TPNKHGLLQNPYRIPPLFPIKSFVKTKCKKNLLEENFEEHS
P38432_127	RKAKKRAFQLEEGEETEPDCKYSKKHWKSRENNNNNEKVLD
P38432_151	KHWKSRENNNNNEKVLDLEPKAVTDQTVSKKNKRKNKATCG
P38432_160	NNNEKVLDLEPKAVTDQTVSKKNKRKNKATCGTVGDDNEEA
P38432_204	SPKKKEKCEYKKKAKNPKSPKVQAVKDWANQRCSSPKGSAR
P38432_209	EKCEYKKKAKNPKSPKVQAVKDWANQRCSSPKGSARNSLVK
P38432_274	DESISDGPSKVTLEARNSSEKLPTELSKEEPSTKNTTADKL
P38432_281	PSKVTLEARNSSEKLPTELSKEEPSTKNTTADKLAIKLGFS
P38432_293	EKLPTELSKEEPSTKNTTADKLAIKLGFSLTPSKGKTSGTT
P38432_297	TELSKEEPSTKNTTADKLAIKLGFSLTPSKGKTSGTTSSSS
P38432_444	SCVVNRSTDNQRQQQLNDVVKNSSTIIQNPVETPKKDYSLL
P38432_496	KIAFKLLELTSSYSPDVSDYKEGRILSHNPETQQVDIEILS
P39023_224	QVPVNQVFGQDEMIDVIGVTKGKGYKGVTSRWHTKKLPRKT
P39023_226	PVNQVFGQDEMIDVIGVTKGKGYKGVTSRWHTKKLPRKTHR
P39023_286	VARAGQKGYHHRTEINKKIYKIGQGYLIKDGKLIKNNASTD
P39023_366	TLRKSLLVQTKRRALEKIDLKFIDTTSKFGHGRFQTMEEKK
P39023_386	KFIDTTSKFGHGRFQTMEEKKAFMGPLKKDRIAKEEGAXXX
P39023_39	RKRSSRHRGKVKSFPKDDPSKPVHLTAFLGYKAGMTHIVRE
P39023_393	KFGHGRFQTMEEKKAFMGPLKKDRIAKEEGAXXXXXXXXXX
P39023_399	FQTMEEKKAFMGPLKKDRIAKEEGAXXXXXXXXXXXXXXXX
P39880_1284	QQKPYPSPKTIEDLATQLNLKTSTVINWFHNYRSRIRRELF
P39880_785	KKPSAAPEAGASALPNPPALKKEAQDAPGLDPQGAADCAQG
P39880_811	APGLDPQGAADCAQGVLRQVKNEVGRSGAWKDHWWSAVQPE
P39880_842	DHWWSAVQPERRNAASSEEAKAEETGGGKEKGSGGSGGGSQ
P40227_251	LTCNVSLEYEKTEVNSGFFYKSAEEREKLVKAERKFIEDRV
P41161_350	DPRLYFDDTCVVPERLEGKVKQEPTMYREGPPYQRRGSLQL
P41162_381	SSEESAPVTTPTMASIPPRIKVEPASEKDPESLRQSAREKE
P41162_388	VTTPTMASIPPRIKVEPASEKDPESLRQSAREKEEHTQEEG
P41208_22	ASNFKKANMASSSQRKRMSPKPELTEEQKQEIREAFDLFDA
P41212_11	XXXXXXXXXXMSETPAQCSIKQERISYTPPESPVPSYASST
P41212_288	LMPSPIMHPLILNPRHSVDFKQSRLSEDGLHREGKPINLSH
P41212_302	RHSVDFKQSRLSEDGLHREGKPINLSHREDLAYMNHIMVSV
P41212_403	HKNRTNMTYEKMSRALRHYYKLNIIRKEPGQRLLFRFMKTP
P41212_421	YYKLNIIRKEPGQRLLFRFMKTPDEIMSGRTDRLEHLESQE
P41229_1127	DAGSDSTKRSRWMEKELGLYKSDTELLGLSAQDLRDPGSVI
P41229_205	EKDKEYKPHSIPLRQSVQPSKFNSYGRRAKRLQPDPEPTEE
P41229_229	YGRRAKRLQPDPEPTEEDIEKNPELKKLQIYGAGPKMMGLG
P41229_244	EEDIEKNPELKKLQIYGAGPKMMGLGLMAKDKTLRKKDKEG
P41229_274	DKTLRKKDKEGPECPPTVVVKEELGGDVKVESTSPKTFLES
P41229_295	EELGGDVKVESTSPKTFLESKEELSHSPEPCTKMTMRLRRN
P41970_165	SFTINSLQNPPDAFKAIKTEKLEEPPEDSPPVEEVRTVIRF
P41970_92	IKKVIGQKFVYKFVSFPEILKMDPHAVEISRESLLLQDSDC
P42167_401	RMEESFSSKYVPKYVPLADVKSEKTKKGRSIPVWIKILLFV
P42224_703	RPKEAPEPMELDGPKGTGYIKTELISVSEVHPSRLQTTDNL
P42285_24	AFGDELFSVFEGDSTTAAGTKKDKEKDKGKWKGPPGSADKA
P42285_358	FREDNFNTAMQVLRDAGDLAKGDQKGRKGGTKGPSNVFKIV
P42285_684	NEGDDFGWGVVVNFSKKSNVKPNSGELDPLYVVEVLLRCSK
P42285_723	SKESLKNSATEAAKPAKPDEKGEMQVVPVLVHLLSAISSVR
P42568_339	TCSADKKQIKDKSHVKMGKVKIESETSEKKKSTLPPFDDIV
P42696_242	AEGTLSKKLAAIKRKIHPDQKNINAYVVFKEESAATQALKR
P42766_25	KARDLRGKKKEELLKQLDDLKVELSQLRVAKVTGGAASKLS
P43243_132	LASFGLSARDLDELSRYPEDKITPENLPQILLQLKRRRTEE
P43243_146	SRYPEDKITPENLPQILLQLKRRRTEEGPTLSYGRDGRSAT
P43243_245	RDGERCRDDSFFGETSHNYHKFDSEYERMGRGPGPLQERSL
P43243_269	EYERMGRGPGPLQERSLFEKKRGAPPSSNIEDFHGLLPKGY
P43243_3	XXXXXXXXXXXXXXXXXXMSKSFQQSSLSRDSQGHGRDLSA
P43243_478	PALVFGKPVRVHLSQKYKRIKKPEGKPDQKFDQKQELGRVI
P43243_487	RVHLSQKYKRIKKPEGKPDQKFDQKQELGRVIHLSNLPHSG
P43243_491	SQKYKRIKKPEGKPDQKFDQKQELGRVIHLSNLPHSGYSDS
P43243_515	GRVIHLSNLPHSGYSDSAVLKLAEPYGKIKNYILMRMKSQA
P43243_522	NLPHSGYSDSAVLKLAEPYGKIKNYILMRMKSQAFIEMETR
P43243_554	QAFIEMETREDAMAMVDHCLKKALWFQGRCVKVDLSEKYKK
P43243_555	AFIEMETREDAMAMVDHCLKKALWFQGRCVKVDLSEKYKKL
P43243_617	YSPDGKESPSDKKSKTDGSQKTESSTEGKEQEEKSGEDGEK
P43243_630	SKTDGSQKTESSTEGKEQEEKSGEDGEKDTKDDQTEQEPNM
P43243_719	AVKKDGSASAAAKKKLKKVDKIEELDQENEAALENGIKNEE
P43243_736	KVDKIEELDQENEAALENGIKNEENTEPGAESSENADDPNK
P43243_770	NADDPNKDTSENADGQSDENKDDYTIPDEYRIGPYQPNVPV
P43243_836	AKNTHCSSLPHYQKLKKFLNKLAEERRQKKETXXXXXXXXX
P43246_430	GINQLPNVIQALEKHEGKHQKLLLAVFVTPLTDLRSDFSKF
P43268_139	HHGEQCLYSSAYDPPRQIAIKSPAPGALGQSPLQPFPRAEQ
P43268_322	PLRPFPDDVCVVPEKFEGDIKQEGVGAFREGPPYQRRGALQ
P43268_6	XXXXXXXXXXXXXXXMERRMKAGYLDQQVPYTFSSKSPGNG
P43487_190	GSGKNDHAEKVAEKLEALSVKEETKEDAEEKQXXXXXXXXX
P45973_102	REKSESNKRKSNFSNSADDIKSKKKREQSNDIARGFERGLE
P45973_106	ESNKRKSNFSNSADDIKSKKKREQSNDIARGFERGLEPEKI
P45973_154	GDLMFLMKWKDTDEADLVLAKEANVKCPQIVIAFYEERLTW
P45973_184	VIAFYEERLTWHAYPEDAENKEKETAKSXXXXXXXXXXXXX
P45973_32	SSSEDEEEYVVEKVLDRRVVKGQVEYLLKWKGFSEEHNTWE
P45973_91	KKMKEGENNKPREKSESNKRKSNFSNSADDIKSKKKREQSN
P46060_15	XXXXXXMASEDIAKLAETLAKTQVAGGQLSFKGKSLKLNTA
P46060_279	TLKTLRQVEVINFGDCLVRSKGAVAIADAIRGGLPKLKELN
P46060_452	ADVSTFLAFPSPEKLLRLGPKSSVLIAQQTDTSDPEKVVSA
P46060_524	SSSFNSNTFLTRLLVHMGLLKSEDKVKAIANLYGPLMALNH
P46060_586	PNSALESCSFARHSLLQTLYKVXXXXXXXXXXXXXXXXXXX
P46060_8	XXXXXXXXXXXXXMASEDIAKLAETLAKTQVAGGQLSFKGK
P46087_272	DFGAQREEGRSRSEYLNRLKKDLAIYYSYGDFLLGKLMDLF
P46087_615	QTGNSETATPTNVDLPQVIPKSENSSQPAKKAKGAAKTKQQ
P46087_71	AAKRRLGSVEAPKTNKSPEAKPLPGKLPKGISAGAVQTAGK
P46100_10	XXXXXXXXXXXMTAEPMSESKLNTLVQKLHDFLAHSSEESE
P46100_1004	QSKKGTEEKKKPSDFKKKVIKMEQQYESSSDGTEKLPEREE
P46100_138	MQSLPKGTVIVQPEPVLNEDKDDFKGPEFRSRSKMKTENLK
P46100_142	PKGTVIVQPEPVLNEDKDDFKGPEFRSRSKMKTENLKKRGE
P46100_1488	DDSKSPGKGRKKIRKILKDDKLRTETQNALKEEEERRKRIA
P46100_1982	SRGGGEGNVDETGNNPSVSLKLEESKATSSSNPSSPAPDWY
P46100_1987	EGNVDETGNNPSVSLKLEESKATSSSNPSSPAPDWYKDFVT
P46100_299	ACNSVFENLEQLLQQNKKKIKVDSEKSNKVYEHTSRFSPKK
P46100_438	RAMDAVNKEKNTKEHKVIDAKFETKARKGEKPCALEKKDIS
P46100_623	ADCQEVPQDKDGYKSCGLNPKLEKCGLGQENSDNEHLVENE
P46777_220	MGQNVADYMRYLMEEDEDAYKKQFSQYIKNSVTPDMMEEMY
P46779_58	FRYNGLIHRKTVGVEPAADGKGVVVVIKRRSGQRKPATSYV
P46779_65	HRKTVGVEPAADGKGVVVVIKRRSGQRKPATSYVRTTINKN
P46781_139	LAKSIHHARVLIRQRHIRVRKQVVNIPSFIVRLDSQKHIDF
P46781_93	EGNALLRRLVRIGVLDEGKMKLDYILGLKIEDFLERRLQTQ
P46782_47	DVQINDISLQDYIAVKEKYAKYLPHSAGRYAAKRFRKAQCP
P47712_541	LDAAVADPDEFERIYEPLDVKSKKIHVVDSGLTFNLPYPLI
P47712_606	PFKELLLAEKWAKMNKLPFPKIDPYVFDREGLKECYVFKPK
P48552_1105	QDKDIWREASSAESVSQVTAKEELLPTAETKASFFNLRSPY
P48552_111	EDWNAAKRKRLSDSIMNLNVKKEALLAGMVDSVPKGKQDST
P48552_1115	SAESVSQVTAKEELLPTAETKASFFNLRSPYNSHMGNNASR
P48552_1154	SRPHSANGEVYGLLGSVLTIKKESEXXXXXXXXXXXXXXXX
P48552_170	SQQIRQSLKEQGYALSHDSLKVEKDLRCYGVASSHLKTLLK
P48552_195	LRCYGVASSHLKTLLKKSKVKDQKPDTNLPDVTKNLIRDRF
P48552_198	YGVASSHLKTLLKKSKVKDQKPDTNLPDVTKNLIRDRFAES
P48552_372	IIPSSPKNAGYKNSLERNNIKQAANNSLLLHLLKSQTIPKP
P48552_508	KNSKLNSHQKVTLLQLLLGHKNEENVEKNTSPQGVHNDVSK
P48552_756	ESTQEHSERALSEQILMVKIKSEPCDDLQIPNTNVHLSHDA
P48552_802	LGMAPAVQRSAPALPVSEDFKSEPVSPQDFSFSKNGLLSRL
P48552_850	YLADDSDRSHRNNEMALLESKNLCMVPKKRKLYTEPLENPF
P48552_901	ANNHSAPEVLYGSLLNQEELKFSRNDLEFKYPAGHGSASES
P48552_931	YPAGHGSASESEHRSWARESKSFNVLKQLLLSENCVRDLSP
P48556_297	KAYEKILFTEATRILFFNTPKKMTDYAKKRGWVLGPNNYYS
P48643_20	XMASMGTLAFDEYGRPFLIIKDQDRKSRLMGLEALKSHIMA
P48643_210	VNAVLTVADMERRDVDFELIKVEGKVGGRLEDTKLIKGVIV
P48643_214	LTVADMERRDVDFELIKVEGKVGGRLEDTKLIKGVIVDKDF
P48643_265	DAKIAILTCPFEPPKPKTKHKLDVTSVEDYKALQKYEKEKF
P48643_275	FEPPKPKTKHKLDVTSVEDYKALQKYEKEKFEEMIQQIKET
P48643_279	KPKTKHKLDVTSVEDYKALQKYEKEKFEEMIQQIKETGANL
P48643_392	LVIEQCKNSRAVTIFIRGGNKMIIEEAKRSLHDALCVIRNL
P48681_811	LDQEIARPLENENQEFLKSLKEESVEAVKSLETEILESLKS
P49116_192	CRLKKCLEMGMKMESVQSERKPFDVQREKPSNCAASTEKIY
P49207_108	RDRIKRAFLIEEQKIVVKVLKAQAQSQKAKXXXXXXXXXXX
P49327_2449	AAEQYTPKAKYHGNVMLLRAKTGGAYGEDLGADYNLSQVCD
P49368_15	XXXXXXMMGHRPVLVLSQNTKRESGRKVQSGNINAAKTIAD
P49368_248	RMRRYIKNPRIVLLDSSLEYKKGESQTDIEITREEDFTRIL
P49368_249	MRRYIKNPRIVLLDSSLEYKKGESQTDIEITREEDFTRILQ
P49368_381	TFITDCKDPKACTILLRGASKEILSEVERNLQDAMQVCRNV
P49715_161	GRLEPLYERVGAPALRPLVIKQEPREEDEAKQLALAGLFPY
P49736_178	TEDGEEDEEMIESIENLEDLKGHSVREWVSMAGPRLEIHHR
P49750_1053	DKGLVNRGRGQAISRGPGLVKQEDFRDKMMGRREDSREKMN
P49750_1652	KPPPVQQTVDYGHGRDISTNKVEQIPYGERITLRPDPLPER
P49750_1710	RDREPYFDRQSNVIADHRDFKRDRETHRDRDRDRGVIDYDR
P49750_891	SNQQKNFKMQSAAFSIAADVKDVKAAQSNENLSDSQQEPPK
P49750_983	GGMEGGTAVATSSLTADNDFKPVGIGLPHSENNQDKGLPRP
P49756_261	KEDIFRRFPVAPLIPYPLITKEDINAIEMEEDKRDLISREI
P49756_273	LIPYPLITKEDINAIEMEEDKRDLISREISKFRDTHKKLEE
P49756_430	EREREREREREREREREKDKKRDREEDEEDAYERRKLERKL
P49756_578	PDAELQRMEQEAERRRQPQIKQEPESEEEEEEKQEKEEKRE
P49756_671	ENSPDQQQPEEHRPKIGLSLKLGASNSPGQPNSVKRKKLPV
P49756_688	LSLKLGASNSPGQPNSVKRKKLPVDSVFNKFEDEDSDDVPR
P49756_697	SPGQPNSVKRKKLPVDSVFNKFEDEDSDDVPRKRKLVPLDY
P49756_722	DSDDVPRKRKLVPLDYGEDDKNATKGTVNTEEKRKHIKSLI
P49790_353	SSPLNSPLDRSGIDITDFQAKREKVDSQYPPVQRLMTPKPV
P49848_196	GPLKGKGQGATTADGKGKEKKAPPLLEGAPLRLKPRSIHEL
P49910_162	EHGQEIFQKKVSPPGPALNVKLQPVETKAHFDSSEPQLLWD
P49910_195	SEPQLLWDCDNESENSRSMPKLEIFEKIESQRIISGRISGY
P49910_23	TEPKKAAAQNSPEDEGLLIVKIEEEEFIHGQDTCLQRSELL
P49959_255	DDFIDLVIWGHEHECKIAPTKNEQQLFYISQPGSSVVTSLS
P49959_416	IHFFRHREQKEKTGEEINFGKLITKPSEGTTLRVEDLVKQY
P49959_625	SRNSKTAVSASRNMSIIDAFKSTRQQPSRNVTTKNYSEVIE
P50548_465	DEDEEDGEVFKTPRAPPAPPKPEPGEAPGASQCMPLKLRFK
P50548_481	PAPPKPEPGEAPGASQCMPLKLRFKRRWSEDCRLEGGGGPA
P50548_512	CRLEGGGGPAGGFEDEGEDKKVRGEGPGEAGGPLTPRRVSS
P50549_317	GPRQFYDDTCVVPEKFDGDIKQEPGMYREGPTYQRRGSLQL
P50914_124	MTDFDRFKVMKAKKMRNRIIKNEVKKLQKAALLKASPKKAP
P50990_224	VCKILGSGISSSSVLHGMVFKKETEGDVTSVKDAKIAVYSC
P50990_254	VKDAKIAVYSCPFDGMITETKGTVLIKTAEELMNFSKGEEN
P50990_260	AVYSCPFDGMITETKGTVLIKTAEELMNFSKGEENLMDAQV
P50990_534	AAVTVLRVDQIIMAKPAGGPKPPSGKKDWDDDQNDXXXXXX
P50990_539	LRVDQIIMAKPAGGPKPPSGKKDWDDDQNDXXXXXXXXXXX
P51114_56	WQPERQVPFNEVRLPPPPDIKKEISEGDEVEVYSRANDQEP
P51508_266	CERNQCGKVLSLKHSLSQNVKFPIGEKANTCTEFGKIFTQR
P51523_112	QDNQDKLKIIKRGHECDAFGKNFNLNMNFVPLRKSNSEGDL
P51523_125	HECDAFGKNFNLNMNFVPLRKSNSEGDLDGLILKHHLDLLI
P51523_191	EDTDTWLKYYDCDKYKESYKKSQIIIYHRNRLGEKLYECSE
P51523_457	GKAFSQKSHLISHQMTHTGEKPFICSKCGKAFSRKSQLVRH
P51532_1365	SWIIKDDAEVERLTCEEEEEKMFGRGSRHRKEVDYSDSLTE
P51610_2024	SKDSSGTKPANKRPMSSPEMKSAPKKSKADGQXXXXXXXXX
P51610_282	TIGNKMYVFGGWVPLVMDDVKVATHEKEWKCTNTLACLNLD
P51814_120	ENYSHLLSVGYQIPKSEAAFKLEQGEGPWMLEGEAPHQSCS
P51814_647	GKAFIQKSTLSVHQRIHTGEKPYVCPECGKAFIQKSHFIAH
P51858_80	PKDLFPYEESKEKFGKPNKRKGFSEGLWEIENNPTVKASGY
P51991_118	HKVDGRVVEPKRAVSREDSVKPGAHLTVKKIFVGGIKEDTE
P51991_134	EDSVKPGAHLTVKKIFVGGIKEDTEEYNLRDYFEKYGKIET
P51991_151	GGIKEDTEEYNLRDYFEKYGKIETIEVMEDRQSGKKRGFAF
P51991_182	QSGKKRGFAFVTFDDHDTVDKIVVQKYHTINGHNCEVKKAL
P51991_36	RRRRRRGEEGHDPKEPEQLRKLFIGGLSFETTDDSLREHFE
P51991_4	XXXXXXXXXXXXXXXXXMEVKPPPGRPQPDSGRRRRRRGEE
P52272_127	AEGKSRGCAVVEFKMEESMKKAAEVLNKHSLSGRPLKVKED
P52272_134	CAVVEFKMEESMKKAAEVLNKHSLSGRPLKVKEDPDGEHAR
P52272_143	ESMKKAAEVLNKHSLSGRPLKVKEDPDGEHARRAMQKVMAT
P52272_145	MKKAAEVLNKHSLSGRPLKVKEDPDGEHARRAMQKVMATTG
P52272_17	XXXXMAAGVEAAAEVAATEIKMEEESGAPGVPSGNGAPGPK
P52272_221	RLGSTVFVANLDYKVGWKKLKEVFSMAGVVVRADILEDKDG
P52272_277	AVQAISMFNGQLLFDRPMHVKMDERALPKGDFFPPERPQQL
P52272_285	NGQLLFDRPMHVKMDERALPKGDFFPPERPQQLPHGLGGIG
P52272_345	GMGNIGPAGMGMEGIGFGINKMGGMEGPFGGGMENMGRFGS
P52272_37	KMEEESGAPGVPSGNGAPGPKGEGERPAQNEKRKEKNIKRG
P52272_381	GRFGSGMNMGRINEILSNALKRGEIIAKQGGGGGGGSVPGI
P52272_388	NMGRINEILSNALKRGEIIAKQGGGGGGGSVPGIERMGPGI
P52272_651	GGSFAGSFGGAGGHAPGVARKACQIFVRNLPFDFTWKMLKD
P52272_667	GVARKACQIFVRNLPFDFTWKMLKDKFNECGHVLYADIKME
P52272_685	TWKMLKDKFNECGHVLYADIKMENGKSKGCGVVKFESPEVA
P52272_69	RKEKNIKRGGNRFEPYANPTKRYRAFITNIPFDVKWQSLKD
P52272_692	KFNECGHVLYADIKMENGKSKGCGVVKFESPEVAERACRMM
P52272_698	HVLYADIKMENGKSKGCGVVKFESPEVAERACRMMNGMKLS
P52272_716	VVKFESPEVAERACRMMNGMKLSGREIDVRIDRNAXXXXXX
P52272_83	PYANPTKRYRAFITNIPFDVKWQSLKDLVKEKVGEVTYVEL
P52272_88	TKRYRAFITNIPFDVKWQSLKDLVKEKVGEVTYVELLMDAE
P52565_138	VNREIVSGMKYIQHTYRKGVKIDKTDYMVGSYGPRAEEYEF
P52565_141	EIVSGMKYIQHTYRKGVKIDKTDYMVGSYGPRAEEYEFLTP
P52597_167	PEGKITGEAFVQFASQELAEKALGKHKERIGHRYIEVFKSS
P52597_185	AEKALGKHKERIGHRYIEVFKSSQEEVRSYSDPPLKFMSVQ
P52597_200	YIEVFKSSQEEVRSYSDPPLKFMSVQRPGPYDRPGTARRYI
P52597_224	VQRPGPYDRPGTARRYIGIVKQAGLERMRPGAYSTGYGGYE
P52597_87	VKMALKKDRESMGHRYIEVFKSHRTEMDWVLKHSGPNSADS
P52732_477	KTQELETTQKHLQETKLQLVKEEYITSALESTEEKLHDAAS
P52736_310	RTHSGEKPYMCSECGRGFSQKSNLIIHQRTHSGEKPYVCRE
P52736_338	RTHSGEKPYVCRECGKGFSQKSAVVRHQRTHLEEKTIVCSD
P52736_506	RTHSGEKPMVCGECGRGFSQKSNLVAHQRTHSGERPYVCRE
P52736_576	GLGFGNKSALITHKRAHSEEKPCVCRECGQGFLQKSHLTLH
P52736_604	GQGFLQKSHLTLHQMTHTGEKPYVCKTCGRGFSLKSHLSRH
P52736_618	MTHTGEKPYVCKTCGRGFSLKSHLSRHRKTTSVHHRLPVQP
P52739_289	SFKLFYHFKEHMKSHSTESFKCEICNKRYLRESAWKQHLNC
P52739_295	HFKEHMKSHSTESFKCEICNKRYLRESAWKQHLNCYHLEEG
P52741_135	IVKNCTVSKEPHPSEKPFTCKEEQKNFQATLGGCQQKAIHS
P52741_139	CTVSKEPHPSEKPFTCKEEQKNFQATLGGCQQKAIHSKRKT
P52741_20	XMTLVTAGGAWTGPGCWHEVKDEESSSEQSISIAVSHVNTS
P52746_1193	CGDCGFTCKQSRCMQQHRRLKHEGVKPHQCPFCDFSTTRRY
P52746_1242	HTGIGRIPCSSCPQTFGTNSKLRLHRLRVHDKTPTHFCPLC
P52746_1591	GKAFKTRFLLRTHLRKHSEAKPYVCNVCHRAFRWAAGLRHH
P52746_594	HCALCDYRTFSNTTLLFHKRKAHGYVPGDQAWQLRYASQEP
P52747_213	IDGSESVAGTGMIGENEQEKKMQIVLQGHATRVTAKSQQSG
P52747_406	PYVCTVPGCDKRFTEYSSLYKHHVVHTHSKPYNCNHCGKTY
P52948_563	ALTTPTHYKLTPRPATRVRPKALQTTGTAKSHLFDGLDDDE
P52948_603	EPSLANGAFMPKKSIKKLVLKNLNNSNLFSPVNRDSENLAS
P52948_665	HQQDGDEDSLVSHFYTNPIAKPIPQTPESAGNKHSNSNSVD
P53350_338	CLTIPPRFSIAPSSLDPSNRKPLTVLNKGLENPLPERPREK
P53567_3	XXXXXXXXXXXXXXXXXXMSKISQQNSTPGVNGISVIHTQA
P53999_68	ALSSSKQSSSSRDDNMFQIGKMRYVSVRDFKGKVLIDIREY
P54132_105	RVKDFFKNAPAGQETQRGGSKSLLPDFLQTPKEVVCTTQNT
P54132_1125	PSGRFTMNMLVDIFLGSKSAKIQSGIFGKGSAYSRHNAERL
P54132_116	GQETQRGGSKSLLPDFLQTPKEVVCTTQNTPTVKKSRDTAL
P54132_1199	TVLNGNLKVDFMETENSSSVKKQKALVAKVSQREEMVKKCL
P54132_1207	VDFMETENSSSVKKQKALVAKVSQREEMVKKCLGELTEVCK
P54132_129	PDFLQTPKEVVCTTQNTPTVKKSRDTALKKLEFSSSPDSLS
P54132_1329	RSAAEELDEEIPVSSHYFASKTRNERKRKKMPASQRSKRRK
P54132_1372	SSGSKAKGGSATCRKISSKTKSSSIIGSSSASHTSQATSGA
P54132_1395	SIIGSSSASHTSQATSGANSKLGIMAPPKPINRPFLKPSYA
P54132_195	SHFVRVSTAQKSKKGKRNFFKAQLYTTNTVKTDLPPPSSES
P54132_205	KSKKGKRNFFKAQLYTTNTVKTDLPPPSSESEQIDLTEEQK
P54132_24	VPQNNLQEQLERHSARTLNNKLSLSKPKFSGFTFKKKTSSD
P54132_31	EQLERHSARTLNNKLSLSKPKFSGFTFKKKTSSDNNVSVTN
P54132_331	ASSSSSKCLSTLKDLDTSDRKEDVLSTSKDLLSKPEKMSMQ
P54132_344	DLDTSDRKEDVLSTSKDLLSKPEKMSMQELNPETSTDCDAR
P54132_347	TSDRKEDVLSTSKDLLSKPEKMSMQELNPETSTDCDARQIS
P54132_38	ARTLNNKLSLSKPKFSGFTFKKKTSSDNNVSVTNVSVAKTP
P54132_451	RPDSLDGPMEGDSCPTGNSMKELNFSHLPSNSVSPGDCLLT
P54132_476	SHLPSNSVSPGDCLLTTTLGKTGFSATRKNLFERPLFNTHL
P54132_484	SPGDCLLTTTLGKTGFSATRKNLFERPLFNTHLQKSFVSSN
P54132_498	GFSATRKNLFERPLFNTHLQKSFVSSNWAETPRLGKKNESS
P54132_513	NTHLQKSFVSSNWAETPRLGKKNESSYFPGNVLTSTAVKDQ
P54132_514	THLQKSFVSSNWAETPRLGKKNESSYFPGNVLTSTAVKDQN
P54132_531	LGKKNESSYFPGNVLTSTAVKDQNKHTASINDLERETQPSY
P54132_535	NESSYFPGNVLTSTAVKDQNKHTASINDLERETQPSYDIDN
P54132_56	TFKKKTSSDNNVSVTNVSVAKTPVLRNKDVNVTEDFSFSEP
P54132_588	EDIMHNLAASKSSTAAYQPIKEGRPIKSVSERLSSAKTDCL
P54132_594	LAASKSSTAAYQPIKEGRPIKSVSERLSSAKTDCLPVSSTA
P54132_604	YQPIKEGRPIKSVSERLSSAKTDCLPVSSTAQNINFSESIQ
P54132_63	SDNNVSVTNVSVAKTPVLRNKDVNVTEDFSFSEPLPNTTNQ
P54132_87	VTEDFSFSEPLPNTTNQQRVKDFFKNAPAGQETQRGGSKSL
P54132_91	FSFSEPLPNTTNQQRVKDFFKNAPAGQETQRGGSKSLLPDF
P54259_1183	AHHPLHSVPLPAQEDYYSHLKKESDKPLXXXXXXXXXXXXX
P54274_213	AEEVFERIFGDPNSHMPFKSKLLMIISQKDTFHSFFQHFSY
P54274_325	TESSEGTVSLLRSHKNLFLSKLQHGTQQQDLNKKERRVGTP
P54274_366	QSTKKKKESRRATESRIPVSKSQPVTPEKHRARKRQAWLWE
P55010_413	EEEDEDENIEVVYSKAASVPKVETVKSDNKDDDIDIDAIXX
P55010_418	DENIEVVYSKAASVPKVETVKSDNKDDDIDIDAIXXXXXXX
P55036_122	GKNHKMRIIAFVGSPVEDNEKDLVKLAKRLKKEKVNVDIIN
P55055_409	GRVEALQQPYVEALLSYTRIKRPQDQLRFPRMLMKLVSLRT
P55055_447	LRTLSSVHSEQVFALRLQDKKLPPLLSEIWDVHEXXXXXXX
P55072_18	XXXMASGADSKGDDLSTAILKQKNRPNRLIVDEAINEDNSV
P55072_8	XXXXXXXXXXXXXMASGADSKGDDLSTAILKQKNRPNRLIV
P55081_249	AKRMAEERRKYTLKIVEEETKKELEENKRSLAALDALNTDD
P55081_357	FLQKYYHRGAFFMDEDEEVYKRDFSAPTLEDHFNKTILPKV
P55081_371	EDEEVYKRDFSAPTLEDHFNKTILPKVMQVKNFGRSGRTKY
P55081_381	SAPTLEDHFNKTILPKVMQVKNFGRSGRTKYTHLVDQDTTS
P55081_415	VDQDTTSFDSAWGQESAQNTKFFKQKAAGVRDVFERPSAKK
P55081_418	DTTSFDSAWGQESAQNTKFFKQKAAGVRDVFERPSAKKRKT
P55081_67	YAPMESSDEEDEEFQFIKKAKEQEAEPEEQEEDSSSDPRLR
P55197_280	TVTTEKTYTSTSNNSISGSLKRLEDTTARFTNANFQEVSAH
P55265_384	QIKRNTNSVPETAPAAIPETKRNAEFLTCNIPTSNASNNMV
P55265_408	EFLTCNIPTSNASNNMVTTEKVENGQEPVIKLENRQEARPE
P55265_418	NASNNMVTTEKVENGQEPVIKLENRQEARPEPARLKPPVHY
P55265_580	DAAMKAMTILLEEAKAKDSGKSEESSHYSTEKESEKTAESQ
P55265_875	LTNSFQPSLLGRKILAAIIMKKDSEDMGVVVSLGTGNRCVK
P55854_11	XXXXXXXXXXMSEEKPKEGVKTENDHINLKVAGQDGSVVQF
P55854_5	XXXXXXXXXXXXXXXXMSEEKPKEGVKTENDHINLKVAGQD
P55854_7	XXXXXXXXXXXXXXMSEEKPKEGVKTENDHINLKVAGQDGS
P57071_883	YRKDVMLDHQRRHLEGVRRVKREDLEAGGENLVRYKKEPSG
P59923_317	QAAQPKGNPVAAPTGDDLQSKTNKFILNQEPLEEAETLAVS
P59923_374	SFQQKSRQKDQCENPIQVRVKKEETNFSHRTGKDSEVSGSN
P59923_375	FQQKSRQKDQCENPIQVRVKKEETNFSHRTGKDSEVSGSNS
P59923_399	NFSHRTGKDSEVSGSNSLDLKHVTYLRVSGRKESLKHGCGK
P59923_567	EKAFRRLSAYRLHRETHAKKKFLELNQYRAALTYSSGFDHH
P59923_654	FRWRSNFTRHMRLHEEEKFYKQDECREGFRQSPDCSQPQGA
P59923_736	KDFAYRSAFIVHKKKHAMKRKPEGGPSFSQDTVFQVPQSSH
P59923_758	EGGPSFSQDTVFQVPQSSHSKEEPYKCSQCGKAFRNHSFLL
P59923_938	HTRAAQAERSPPARSSSQDTKLRLQKLKPSEEMPLEDCKEA
P59923_956	DTKLRLQKLKPSEEMPLEDCKEACSQSSRLTGLQDISIGKK
P59923_975	CKEACSQSSRLTGLQDISIGKKCHKCSICGKTFNKSSQLIS
P60842_146	YMGASCHACIGGTNVRAEVQKLQMEAPHIIVGTPGRVFDML
P60842_225	SNTQVVLLSATMPSDVLEVTKKFMRDPIRILVKKEELTLEG
P60842_238	SDVLEVTKKFMRDPIRILVKKEELTLEGIRQFYINVEREEW
P60842_309	TEKMHARDFTVSAMHGDMDQKERDVIMREFRSGSSRVLITT
P60842_369	LPTNRENYIHRIGRGGRFGRKGVAINMVTEEDKRTLRDIET
P60842_381	GRGGRFGRKGVAINMVTEEDKRTLRDIETFYNTSIEEMPLN
P60903_37	HKFAGDKGYLTKEDLRVLMEKEFPGFLENQKDPLAVDKIMK
P61247_249	MELHGEGSSSGKATGDETGAKVERADGYEPPVQESVXXXXX
P61247_34	KKGAKKKVVDPFSKKDWYDVKAPAMFNIRNIGKTLVTRTQG
P61254_136	KKILERKAKSRQVGKEKGKYKEETIEKMQEXXXXXXXXXXX
P61313_83	RIRVRRGGRKRPVPKGATYGKPVHHGVNQLKFARSLQSVAE
P61956_11	XXXXXXXXXXMADEKPKEGVKTENNDHINLKVAGQDGSVVQ
P61956_21	MADEKPKEGVKTENNDHINLKVAGQDGSVVQFKIKRHTPLS
P61956_5	XXXXXXXXXXXXXXXXMADEKPKEGVKTENNDHINLKVAGQ
P61956_7	XXXXXXXXXXXXXXMADEKPKEGVKTENNDHINLKVAGQDG
P61964_27	KPETEAARAQPTPSSSATQSKPTPVKPNYALKFTLAGHTKA
P61964_46	SKPTPVKPNYALKFTLAGHTKAVSSVKFSPNGEWLASSSAD
P61964_7	XXXXXXXXXXXXXXMATEEKKPETEAARAQPTPSSSATQSK
P61978_163	FDCELRLLIHQSLAGGIIGVKGAKIKELRENTQTTIKLFQE
P61978_219	PDRVVECIKIILDLISESPIKGRAQPYDPNFYDETYDYGGF
P61978_34	ETNGEFGKRPAEDMEEEQAFKRSRNTDEMVELRILLQSKNA
P61978_405	GPIITTQVTIPKDLAGSIIGKGGQRIKQIRHESGASIKIDE
P61978_422	IIGKGGQRIKQIRHESGASIKIDEPLEGSEDRIITITGTQD
P61978_52	AFKRSRNTDEMVELRILLQSKNAGAVIGKGGKNIKALRTDY
P61978_60	DEMVELRILLQSKNAGAVIGKGGKNIKALRTDYNASVSVPD
P62081_70	EIEVGGGRKAIIIFVPVPQLKSFQKIQVRLVRELEKKFSGK
P62081_74	GGGRKAIIIFVPVPQLKSFQKIQVRLVRELEKKFSGKHVVF
P62241_170	DERKKNAKISSLLEEQFQQGKLLACIASRPGQCGRADGYVL
P62241_193	ACIASRPGQCGRADGYVLEGKELEFYLRKIKARKGKXXXXX
P62258_50	VAGMDVELTVEERNLLSVAYKNVIGARRASWRIISSIEQKE
P62263_106	KELGITALHIKLRATGGNRTKTPGPGAQSALRALARSGMKI
P62263_61	FVHVTDLSGKETICRVTGGMKVKADRDESSPYAAMLAAQDV
P62263_63	HVTDLSGKETICRVTGGMKVKADRDESSPYAAMLAAQDVAQ
P62266_37	RRDQKWHDKQYKKAHLGTALKANPFGGASHAKGIVLEKVGV
P62269_106	RQKDVKDGKYSQVLANGLDNKLREDLERLKKIRAHRGLRHF
P62269_91	MQNPRQYKIPDWFLNRQKDVKDGKYSQVLANGLDNKLREDL
P62269_94	PRQYKIPDWFLNRQKDVKDGKYSQVLANGLDNKLREDLERL
P62277_43	PTWLKLTSDDVKEQIYKLAKKGLTPSQIGVILRDSHGVAQV
P62314_86	RYFILPDSLPLDTLLVDVEPKVKSKKREAVAGRGRGRGRGR
P62316_6	XXXXXXXXXXXXXXXMSLLNKPKSEMTPEELQKREEEEFNT
P62316_8	XXXXXXXXXXXXXMSLLNKPKSEMTPEELQKREEEEFNTGP
P62328_12	XXXXXXXXXMSDKPDMAEIEKFDKSKLKKTETQEKNPLPSK
P62424_11	XXXXXXXXXXMPKGKKAKGKKVAPAPAVVKKQEAKKVVNPL
P62424_125	ETKQEKKQRLLARAEKKAAGKGDVPTKRPPVLRAGVNTVTT
P62424_20	XMPKGKKAKGKKVAPAPAVVKKQEAKKVVNPLFEKRPKNFG
P62424_21	MPKGKKAKGKKVAPAPAVVKKQEAKKVVNPLFEKRPKNFGI
P62424_245	NYNDRYDEIRRHWGGNVLGPKSVARIAKLEKAKAKELATKL
P62424_48	VNPLFEKRPKNFGIGQDIQPKRDLTRFVKWPRYIRLQRQRA
P62424_97	PPAINQFTQALDRQTATQLLKLAHKYRPETKQEKKQRLLAR
P62495_404	KFGATLEIVTDKSQEGSQFVKGFGGIGGILRYRVDFQGMEY
P62495_87	NRLSVLGAITSVQQRLKLYNKVPPNGLVVYCGTIVTEEGKE
P62701_230	VKDANGNSFATRLSNIFVIGKGNKPWISLPRGKGIRLTIAE
P62750_14	XXXXXXXMAPKAKKEAPAPPKAEAKAKALKAKKAVLKGVHS
P62753_14	XXXXXXXMKLNISFPATGCQKLIEVDDERKLRTFYEKRMAT
P62805_13	XXXXXXXXMSGRGKGGKGLGKGGAKRHRKVLRDNIQGITKP
P62805_21	MSGRGKGGKGLGKGGAKRHRKVLRDNIQGITKPAIRRLARR
P62805_32	GKGGAKRHRKVLRDNIQGITKPAIRRLARRGGVKRISGLIY
P62805_60	RRGGVKRISGLIYEETRGVLKVFLENVIRDAVTYTEHAKRK
P62805_80	KVFLENVIRDAVTYTEHAKRKTVTAMDVVYALKRQGRTLYG
P62805_92	TYTEHAKRKTVTAMDVVYALKRQGRTLYGFGGXXXXXXXXX
P62826_152	KAKSIVFHRKKNLQYYDISAKSNYNFEKPFLWLARKLIGDP
P62826_71	VFHTNRGPIKFNVWDTAGQEKFGGLRDGYYIQAQCAIIMFD
P62841_108	EMVGSMVGVYNGKTFNQVEIKPEMIGHYLGEFSITYKPVKH
P62847_37	LLQRKQMVIDVLHPGKATVPKTEIREKLAKMYKTTPDVIFV
P62888_26	KTKKSLESINSRLQLVMKSGKYVLGYKQTLKMIRQGKAKLV
P62906_118	KLVKKLAKKYDAFLASESLIKQIPRILGPGLNKAGKFPSLL
P62906_161	NENMVAKVDEVKSTIKFQMKKVLCLAVAVGHVKMTDDELVY
P62910_9	XXXXXXXXXXXXMAALRPLVKPKIVKKRTKKFIRHQSDRYV
P62913_154	LGRPGFSIADKKRRTGCIGAKHRISKEEAMRWFQQKYDGII
P62913_38	RKLCLNICVGESGDRLTRAAKVLEQLTGQTPVFSKARYTVR
P62913_52	RLTRAAKVLEQLTGQTPVFSKARYTVRSFGIRRNEKIAVHC
P62917_149	ASGNYATVISHNPETKKTRVKLPSGSKKVISSANRAVVGVV
P62917_234	GNHQHIGKPSTIRRDAPAGRKVGLIAARRTGRLRGTKTVQE
P62917_250	PAGRKVGLIAARRTGRLRGTKTVQEKENXXXXXXXXXXXXX
P62917_42	HRKGAARLRAVDFAERHGYIKGIVKDIIHDPGRGAPLAKVV
P62937_28	FDIAVDGEPLGRVSFELFADKVPKTAENFRALSTGEKGFGY
P62937_82	CQGGDFTRHNGTGGKSIYGEKFEDENFILKHTGPGILSMAN
P62995_197	ERANGMELDGRRIRVDFSITKRPHTPTPGIYMGRPTYGSSR
P63165_16	XXXXXMSDQEAKPSTEDLGDKKEGEYIKLKVIGQDSSEIHF
P63165_17	XXXXMSDQEAKPSTEDLGDKKEGEYIKLKVIGQDSSEIHFK
P63165_23	DQEAKPSTEDLGDKKEGEYIKLKVIGQDSSEIHFKVKMTTH
P63165_37	KEGEYIKLKVIGQDSSEIHFKVKMTTHLKKLKESYCQRQGV
P63165_39	GEYIKLKVIGQDSSEIHFKVKMTTHLKKLKESYCQRQGVPM
P63165_45	KVIGQDSSEIHFKVKMTTHLKKLKESYCQRQGVPMNSLRFL
P63165_46	VIGQDSSEIHFKVKMTTHLKKLKESYCQRQGVPMNSLRFLF
P63165_7	XXXXXXXXXXXXXXMSDQEAKPSTEDLGDKKEGEYIKLKVI
P63167_43	ECATQALEKYNIEKDIAAHIKKEFDKKYNPTWHCIVGRNFG
P63173_4	XXXXXXXXXXXXXXXXXMPRKIEEIKDFLLTARRKDAKSVK
P63173_9	XXXXXXXXXXXXMPRKIEEIKDFLLTARRKDAKSVKIKKNK
P63220_41	NRIIGAKDHASIQMNVAEVDKVTGRFNGQFKTYAICGAIRR
P63279_101	LFHPNVYPSGTVCLSILEEDKDWRPAITIKQILLGIQELLN
P63279_18	XXXMSGIALSRLAQERKAWRKDHPFGFVAVPTKNPDGTMNL
P63279_48	PTKNPDGTMNLMNWECAIPGKKGTPWEGGLFKLRMLFKDDY
P63279_49	TKNPDGTMNLMNWECAIPGKKGTPWEGGLFKLRMLFKDDYP
P67809_26	ETQQPPAAPPAAPALSAADTKPGTTGSGAGSGGPGGLTSAA
P67870_212	IHPMAYQLQLQAASNFKSPVKTIRXXXXXXXXXXXXXXXXX
P78332_1019	YLERREREGKFKGRGNDRREKLQSFDSPERKRIKYSRETDS
P78332_1042	SFDSPERKRIKYSRETDSDRKLVDKEDIDTSSKGGCVQQAT
P78332_1046	PERKRIKYSRETDSDRKLVDKEDIDTSSKGGCVQQATGWRK
P78332_1066	KEDIDTSSKGGCVQQATGWRKGTGLGYGHPGLASSEEAEGR
P78332_331	NRREESTHDHTIERPAFGIQKGEFEHSETREGETQGVAFEH
P78332_36	GSQEERFAPGWNRDYPPPPLKSHAQERHSGNFPGRDSLPFD
P78332_386	DQDKSQLSGREEQSSDAGLFKEEGGLDFLGRQDTDYRSMEY
P78332_453	ARDAQRDLQDQDYRTGPSEEKPSRLIRLSGVPEDATKEEIL
P78332_469	PSEEKPSRLIRLSGVPEDATKEEILNAFRTPDGMPVKNLQL
P78332_569	IGGHRSSCSFCKNPREVTEAKQELITYPQPQKTSIPAPLEK
P78332_871	DGKEKKDRGVTRFQENASEGKAPAEDVFKKPLPPTVKKEES
P78332_879	GVTRFQENASEGKAPAEDVFKKPLPPTVKKEESPPPPKVVN
P78332_887	ASEGKAPAEDVFKKPLPPTVKKEESPPPPKVVNPLIGLLGE
P78332_935	EEEEEEEQTPPPQPRTAQPQKREEQTKKENEEDKLTDWNKL
P78332_948	PRTAQPQKREEQTKKENEEDKLTDWNKLACLLCRRQFPNKE
P78332_991	IKHQQLSDLHKQNLEIHRKIKQSEQELAYLERREREGKFKG
P78344_575	YLNSGNANEAVNGVREMRAPKHFLPEMLSKVIILSLDRSDE
P78347_130	ETLRKTVEDYFCFCYGKALGKSTVVPVPYEKMLRDQSAVVV
P78347_140	FCFCYGKALGKSTVVPVPYEKMLRDQSAVVVQGLPEGVAFK
P78347_185	YDLATLKWILENKAGISFIIKRPFLEPKKHVGGRVMVTDAD
P78347_219	VMVTDADRSILSPGGSCGPIKVKTEPTEDSGISLEMAAVTV
P78347_221	VTDADRSILSPGGSCGPIKVKTEPTEDSGISLEMAAVTVKE
P78347_326	DPEVEVTIEDDDYSPPSKRPKANELPQPPVPEPANAGKRKV
P78347_343	KRPKANELPQPPVPEPANAGKRKVREFNFEKWNARITDLRK
P78347_35	ESSESRMVVTFLMSALESMCKELAKSKAEVACIAVYETDVF
P78347_353	PPVPEPANAGKRKVREFNFEKWNARITDLRKQVEELFERKY
P78347_380	DLRKQVEELFERKYAQAIKAKGPVTIPYPLFQSHVEDLYVE
P78347_435	GIPRLERILLAKERIRFVIKKHELLNSTREDLQLDKPASGV
P78347_450	RFVIKKHELLNSTREDLQLDKPASGVKEEWYARITKLRKMV
P78347_456	HELLNSTREDLQLDKPASGVKEEWYARITKLRKMVDQLFCK
P78347_488	KMVDQLFCKKFAEALGSTEAKAVPYQKFEAHPNDLYVEGLP
P78347_494	FCKKFAEALGSTEAKAVPYQKFEAHPNDLYVEGLPENIPFR
P78347_526	GLPENIPFRSPSWYGIPRLEKIIQVGNRIKFVIKRPELLTH
P78347_561	PELLTHSTTEVTQPRTNTPVKEDWNVRITKLRKQVEEIFNL
P78347_660	KFVVKKPELVISYLPPGMASKINTKALQSPKRPRSPGSNSK
P78347_664	KKPELVISYLPPGMASKINTKALQSPKRPRSPGSNSKVPEI
P78347_670	ISYLPPGMASKINTKALQSPKRPRSPGSNSKVPEIEVTVEG
P78347_680	KINTKALQSPKRPRSPGSNSKVPEIEVTVEGPNNNNPQTSA
P78347_715	NPQTSAVRTPTQTNGSNVPFKPRGREFSFEAWNAKITDLKQ
P78347_816	RNKAKIKFIIKKPEMFETAIKESTSSKSPPRKINSSPNVNT
P78347_827	KPEMFETAIKESTSSKSPPRKINSSPNVNTTASGVEDLNII
P78347_86	VNTRKDFQKDFVKYCVEEEEKAAEMHKMKSTTQANRMSVDA
P78347_861	VEDLNIIQVTIPDDDNERLSKVEKARQLREQVNDLFSRKFG
P78347_864	LNIIQVTIPDDDNERLSKVEKARQLREQVNDLFSRKFGEAI
P78347_879	LSKVEKARQLREQVNDLFSRKFGEAIGMGFPVKVPYRKITI
P78347_891	QVNDLFSRKFGEAIGMGFPVKVPYRKITINPGCVVVDGMPP
P78347_92	FQKDFVKYCVEEEEKAAEMHKMKSTTQANRMSVDAVEIETL
P78347_94	KDFVKYCVEEEEKAAEMHKMKSTTQANRMSVDAVEIETLRK
P78347_991	SQLEVPATEEIKETDGSSQIKQEPDPTWXXXXXXXXXXXXX
P78364_763	IQEGAEPFPVGCSQLLKESEKPLQTGLPTGLTENQSGGPLG
P78371_248	QPKRIENAKILIANTGMDTDKIKIFGSRVRVDSTAKVAEIE
P80723_163	KEEGEPKKTEAPAAPAAQETKSDGAPASDSKPGSSEAAPSS
P80723_25	LSKKKKGYNVNDEKAKEKDKKAEGAATEEEGTPKESEPQAA
P80723_84	GKAEEKEGEKDAAAAKEEAPKAEPEKTEGAAEAKAEPPKAP
P80723_97	AAKEEAPKAEPEKTEGAAEAKAEPPKAPEQEQAAPGPAAGG
P82970_101	KNGEAKITEAPASEKEIVEVKEENIEDATEKGGEKKEAVAA
P82970_124	NIEDATEKGGEKKEAVAAEVKNEEEDQKEDEEDQNEEKGEA
P82970_67	TKSDMMEENIDTSAQAVAETKQEAVVEEDYNENAKNGEAKI
P83369_120	PDAPAPDPERIQRLRRLMVAKEEGDGAAGAGRRGPGRSRKA
P83731_147	MAAAKAPTKAAPKQKIVKPVKVSAPRVGGKRXXXXXXXXXX
P83731_2	XXXXXXXXXXXXXXXXXXXMKVELCSFSGYKIYPGHGRRYA
P83731_27	SFSGYKIYPGHGRRYARTDGKVFQFLNAKCESAFLSKRNPR
P83731_35	PGHGRRYARTDGKVFQFLNAKCESAFLSKRNPRQINWTVLY
P83916_150	GELMFLMKWKNSDEADLVPAKEANVKCPQVVISFYEERLTW
P83916_33	VLEEEEEEYVVEKVLDRRVVKGKVEYLLKWKGFSDEDNTWE
P83916_9	XXXXXXXXXXXXMGKKQNKKKVEEVLEEEEEEYVVEKVLDR
P83916_99	KSEGGKRKADSDSEDKGEESKPKKKKEESEKPRGFARGLEP
P84090_12	XXXXXXXXXMSHTILLVQPTKRPEGRTYADYESVNECMEGV
Q00613_126	RGQEQLLENIKRKVTSVSTLKSEDIKIRQDSVTKLLTDVQL
Q00613_131	LLENIKRKVTSVSTLKSEDIKIRQDSVTKLLTDVQLMKGKQ
Q00613_208	KLIQFLISLVQSNRILGVKRKIPLMLNDSGSAHSMPKYSRQ
Q00613_224	GVKRKIPLMLNDSGSAHSMPKYSRQFSLEHVHGSGPYSAPS
Q00613_298	ASPGGSIDERPLSSSPLVRVKEEPPSPPQSPRVEEASPGRP
Q00613_91	RQLNMYGFRKVVHIEQGGLVKPERDDTEFQHPCFLRGQEQL
Q00839_265	GVKRPREDHGRGYFEYIEENKYSRAKSPQPPVEEEDEHFDD
Q00839_495	FIQNVPLEDRVRGPKGPEEKKDCEVVMMIGLPGAGKTTWVT
Q00839_516	DCEVVMMIGLPGAGKTTWVTKHAAENPGKYNILGTNTIMDK
Q00839_524	GLPGAGKTTWVTKHAAENPGKYNILGTNTIMDKMMVAGFKK
Q00839_536	KHAAENPGKYNILGTNTIMDKMMVAGFKKQMADTGKLNTLL
Q00839_565	QMADTGKLNTLLQRAPQCLGKFIEIAARKKRNFILDQTNVS
Q00839_574	TLLQRAPQCLGKFIEIAARKKRNFILDQTNVSAAAQRRKMC
Q00839_609	QRRKMCLFAGFQRKAVVVCPKDEDYKQRTQKKAEVEGKDLP
Q00839_626	VCPKDEDYKQRTQKKAEVEGKDLPEHAVLKMKGNFTLPEVA
Q00839_635	QRTQKKAEVEGKDLPEHAVLKMKGNFTLPEVAECFDEITYV
Q00839_664	EVAECFDEITYVELQKEEAQKLLEQYKEESKKALPPEKKQN
Q00839_670	DEITYVELQKEEAQKLLEQYKEESKKALPPEKKQNTGSKKS
Q00839_814	GYKNQSQGYNQWQQGQFWGQKPWSQHYHQGYYXXXXXXXXX
Q01167_161	CTFRFPSTNIKITFTALSSEKREKQEASESPVKAVQPHISP
Q01167_164	RFPSTNIKITFTALSSEKREKQEASESPVKAVQPHISPLTI
Q01167_527	VLAPPKAEAQENGDHREVKVKVEPIPAIGHATLGTASRIIQ
Q01167_633	SLPTKRHNGDQPEQPELKRIKTEDGEGIVIALSVDTPPAAV
Q01664_147	RRRAEDKDEGIGSPDIWEDEKAEDLRREMIELRQQLDKERS
Q01664_187	SVRMMLEEQVRSLEAHMYPEKLKVIAQQVQLQQQQEQVRLL
Q01664_189	RMMLEEQVRSLEAHMYPEKLKVIAQQVQLQQQQEQVRLLHQ
Q01664_285	SRQNLDTIVQAIQHIEGTQEKQELEEEQRRAVIVKPVRSCP
Q01780_19	XXMAPPSTREPRVLSATSATKSDGEMVLPGFPDADSFVKFA
Q01780_583	RQQINEMHLLIQQAREMPLLKSEVAAGVKKSGPLPSAERLE
Q01780_710	NPFRMFLPSLGHRAPVSQAAKFDPSTKIYEISNRWKLAQVQ
Q01780_826	KDPEPPEKEFTPYDYSQSDFKAFAGNSKSKVSSQFDPNKQT
Q01780_833	KEFTPYDYSQSDFKAFAGNSKSKVSSQFDPNKQTPSGKKCI
Q01780_859	QFDPNKQTPSGKKCIAAKKIKQSVGNKSMSFPTGKSDRGFR
Q01780_873	IAAKKIKQSVGNKSMSFPTGKSDRGFRYNWPQRXXXXXXXX
Q01826_51	ARLEQNGSPLGRGRLGSTGAKMQGVPLKHSGHLMKTNLRKG
Q01831_161	EPVLGDVRESTAFSRSLLPVKPVEIEIETPEQAKTRERSEK
Q01831_41	SKAKSKARREEEEEDAFEDEKPPKKSLLSKVSQGKRKRGCS
Q01831_81	SHPGGSADGPAKKKVAKVTVKSENLKVIKDEALSDGDDLRD
Q01831_89	GPAKKKVAKVTVKSENLKVIKDEALSDGDDLRDFPSDLKKA
Q02040_118	GKTIKLSGFSDILKVRAAEFKIDFPTRHDWDSFFRDAKDMN
Q02241_571	ISGQKLEIERLEKKNKTLEYKIEILEKTTTIYEEDKRNLQQ
Q02241_586	KTLEYKIEILEKTTTIYEEDKRNLQQELETQNQKLQRQFSD
Q02241_624	FSDKRRLEARLQGMVTETTMKWEKECERRVAAKQLEMQNKL
Q02241_647	KECERRVAAKQLEMQNKLWVKDEKLKQLKAIVTEPKTEKPE
Q02241_662	NKLWVKDEKLKQLKAIVTEPKTEKPERPSRERDREKVTQRS
Q02241_665	WVKDEKLKQLKAIVTEPKTEKPERPSRERDREKVTQRSVSP
Q02241_741	SVASCISEWEQKIPTYNTPLKVTSIARRRQQEPGQSKTCIV
Q02241_823	PPIRLRHRRSRSAGDRWVDHKPASNMQTETVMQPHVPHAIT
Q02241_854	MQPHVPHAITVSVANEKALAKCEKYMLTHQELASDGEIETK
Q02241_874	KCEKYMLTHQELASDGEIETKLIKGDIYKTRGGGQSVQFTD
Q02241_877	KYMLTHQELASDGEIETKLIKGDIYKTRGGGQSVQFTDIET
Q02241_899	DIYKTRGGGQSVQFTDIETLKQESPNGSRKRRSSTVAPAQP
Q02241_956	AVEMRAGSQLGPGYQHHAQPKRKKPXXXXXXXXXXXXXXXX
Q02386_117	LPHEELFCSQIWQQITRELIKYQDSVVNIQRTGCQLEKRDD
Q02386_249	FSQRSHLPHHQRVPTGENPYKYEECGRNVGKSSHCQAPLIV
Q02447_551	SAGIQLHPGENADSPADIRIKEEEPDPEEWQLSGDSTLNTN
Q02447_593	LTHLRVQVVDEEGDQQHQEGKRLRRVACTCPNCKEGGGRGT
Q02543_11	XXXXXXXXXXMKASGTLREYKVVGRCLPTPKCHTPPLYRMR
Q02543_128	QCYRDMGARHRARAHSIQIMKVEEIAASKCRRPAVKQFHDS
Q02543_170	IKFPLPHRVLRRQHKPRFTTKRPNTFFXXXXXXXXXXXXXX
Q02878_5	XXXXXXXXXXXXXXXXMAGEKVEKPDTKEKKPEAKKVDAGG
Q02880_1092	QARFILEKIQGKITIENRSKKDLIQMLVQRGYESDPVKAWK
Q02880_1214	EELDKVESQEREDVLAGMSGKAIKGKVGKPKVKKLQLEETM
Q02880_1217	DKVESQEREDVLAGMSGKAIKGKVGKPKVKKLQLEETMPSP
Q02880_1226	DVLAGMSGKAIKGKVGKPKVKKLQLEETMPSPYGRRIIPEI
Q02880_1227	VLAGMSGKAIKGKVGKPKVKKLQLEETMPSPYGRRIIPEIT
Q02880_1250	LEETMPSPYGRRIIPEITAMKADASKKLLKKKKGDLDTAAV
Q02880_1262	IIPEITAMKADASKKLLKKKKGDLDTAAVKVEFDEEFSGAP
Q02880_1271	ADASKKLLKKKKGDLDTAAVKVEFDEEFSGAPVEGAGEEAL
Q02880_1323	PKREKKEPGTRVRKTPTSSGKPSAKKVKKRNPWSDDESKSE
Q02880_1327	KKEPGTRVRKTPTSSGKPSAKKVKKRNPWSDDESKSESDLE
Q02880_1398	EDDDADDDDDDNNDLEELKVKASPITNDGEDEFVPSDGLDK
Q02880_1440	EYTFSPGKSKATPEKSLHDKKSQDFGNLFSFPSYSQKSEDD
Q02880_1456	LHDKKSQDFGNLFSFPSYSQKSEDDSAKFDSNEEDSASVFS
Q02880_1490	DSASVFSPSFGLKQTDKVPSKTVAAKKGKPSSDTVPKPKRA
Q02880_177	YVPALIFGQLLTSSNYDDDEKKVTGGRNGYGAKLCNIFSTK
Q02880_178	VPALIFGQLLTSSNYDDDEKKVTGGRNGYGAKLCNIFSTKF
Q02880_228	KHSFKQTWMNNMMKTSEAKIKHFDGEDYTCITFQPDLSKFK
Q02880_299	NGKKLPVNGFRSYVDLYVKDKLDETGVALKVIHELANERWD
Q02880_33	VGGGNGALTWVTLFDQNNAAKKEESETANKNDSSKKLSVER
Q02880_34	GGGNGALTWVTLFDQNNAAKKEESETANKNDSSKKLSVERV
Q02880_367	VDYVVDQVVGKLIEVVKKKNKAGVSVKPFQVKNHIWVFINC
Q02880_373	QVVGKLIEVVKKKNKAGVSVKPFQVKNHIWVFINCLIENPT
Q02880_437	EKFFKAASNCGIVESILNWVKFKAQTQLNKKCSSVKYSKIK
Q02880_439	FFKAASNCGIVESILNWVKFKAQTQLNKKCSSVKYSKIKGI
Q02880_446	CGIVESILNWVKFKAQTQLNKKCSSVKYSKIKGIPKLDDAN
Q02880_600	HNWPSLLKHGFLEEFITPIVKASKNKQELSFYSIPEFDEWK
Q02880_605	LLKHGFLEEFITPIVKASKNKQELSFYSIPEFDEWKKHIEN
Q02880_635	EFDEWKKHIENQKAWKIKYYKGLGTSTAKEAKEYFADMERH
Q02880_643	IENQKAWKIKYYKGLGTSTAKEAKEYFADMERHRILFRYAG
Q02880_646	QKAWKIKYYKGLGTSTAKEAKEYFADMERHRILFRYAGPED
Q02880_676	RILFRYAGPEDDAAITLAFSKKKIDDRKEWLTNFMEDRRQR
Q02880_712	DRRQRRLHGLPEQFLYGTATKHLTYNDFINKELILFSNSDN
Q02930_50	EDHLMIHRHKHEMTLKFPSIKTDNMLSDQTPTPTRFLKNCE
Q03111_240	REQAKSSKDTSRKLGEGRLPKEEKAPPPKAAFKEPKMALKE
Q03111_262	EKAPPPKAAFKEPKMALKETKLESTSPKGGPPPPPPPPPRA
Q03111_342	SSFSDKKPAKDKSSTRGEKVKAESEPREAKKALEVEESNSE
Q03112_1018	GTATSSPHSELESTGAILDDKEDAYFTEIRNFIGNSNHGSQ
Q03112_1053	SNHGSQSPRNVEERMNGSHFKDEKALVTSQNSDLLDDEEVE
Q03112_1056	GSQSPRNVEERMNGSHFKDEKALVTSQNSDLLDDEEVEDEV
Q03112_1120	LHEGNPEDDYEETSALEMSCKTSPVRYKEEEYKSGLSALDH
Q03112_1127	DDYEETSALEMSCKTSPVRYKEEEYKSGLSALDHIRHFTDS
Q03112_1132	TSALEMSCKTSPVRYKEEEYKSGLSALDHIRHFTDSLKMRK
Q03112_1149	EEYKSGLSALDHIRHFTDSLKMRKMEDNQYSEAELSSFSTS
Q03112_1152	KSGLSALDHIRHFTDSLKMRKMEDNQYSEAELSSFSTSHVP
Q03112_1176	NQYSEAELSSFSTSHVPEELKQPLHRKSKSQAYAMMLSLSD
Q03112_1184	SSFSTSHVPEELKQPLHRKSKSQAYAMMLSLSDKESLHSTS
Q03112_190	QIFYRVVADIAPGEELLLFMKSEDYPHETMAPDIHEERQYR
Q03112_249	KFPCSTPHSAFSMVEEDFQQKLESENDLQEIHTIQECKECD
Q03112_292	FPDLQSLEKHMLSHTEEREYKCDQCPKAFNWKSNLIRHQMS
Q03112_367	AHACPECGKTFATSSGLKQHKHIHSSVKPFICEVCHKSYTQ
Q03112_374	GKTFATSSGLKQHKHIHSSVKPFICEVCHKSYTQFSNLCRH
Q03112_430	CGQMFSTTSSLNKHRRFCEGKNHFAAGGFFGQGISLPGTPA
Q03112_523	PPLIPASSPVKGLSSTEQTNKSQSPLMTHPQILPATQDILK
Q03112_543	KSQSPLMTHPQILPATQDILKALSKHPSVGDNKPVELQPER
Q03112_547	PLMTHPQILPATQDILKALSKHPSVGDNKPVELQPERSSEE
Q03112_555	LPATQDILKALSKHPSVGDNKPVELQPERSSEERPFEKISD
Q03112_622	ESDIESDKEKFKENGKMFKDKVSPLQNLASINNKKEYSNHS
Q03112_635	NGKMFKDKVSPLQNLASINNKKEYSNHSIFSPSLEEQTAVS
Q03112_663	IFSPSLEEQTAVSGAVNDSIKAIASIAEKYFGSTGLVGLQD
Q03112_685	IASIAEKYFGSTGLVGLQDKKVGALPYPSMFPLPFFPAFSQ
Q03112_721	PAFSQSMYPFPDRDLRSLPLKMEPQSPGEVKKLQKGSSESP
Q03112_731	PDRDLRSLPLKMEPQSPGEVKKLQKGSSESPFDLTTKRKDE
Q03112_732	DRDLRSLPLKMEPQSPGEVKKLQKGSSESPFDLTTKRKDEK
Q03112_735	LRSLPLKMEPQSPGEVKKLQKGSSESPFDLTTKRKDEKPLT
Q03112_749	EVKKLQKGSSESPFDLTTKRKDEKPLTPVPSKPPVTPATSQ
Q03112_752	KLQKGSSESPFDLTTKRKDEKPLTPVPSKPPVTPATSQDQP
Q03112_760	SPFDLTTKRKDEKPLTPVPSKPPVTPATSQDQPLDLSMGSR
Q03112_787	TSQDQPLDLSMGSRSRASGTKLTEPRKNHVFGGKKGSNVES
Q03112_800	RSRASGTKLTEPRKNHVFGGKKGSNVESRPASDGSLQHARP
Q03112_801	SRASGTKLTEPRKNHVFGGKKGSNVESRPASDGSLQHARPT
Q03112_835	LQHARPTPFFMDPIYRVEKRKLTDPLEALKEKYLRPSPGFL
Q03112_844	FMDPIYRVEKRKLTDPLEALKEKYLRPSPGFLFHPQMSAIE
Q03112_846	DPIYRVEKRKLTDPLEALKEKYLRPSPGFLFHPQMSAIENM
Q03112_877	HPQMSAIENMAEKLESFSALKPEASELLQSVPSMFNFRAPP
Q03112_99	EFELRESNMPGAGLGIWTKRKIEVGEKFGPYVGEQRSNLKD
Q03188_119	FVVEPSEATNRSVQAHEVHQKILATDVSSKNTPDSKKISSR
Q03188_134	HEVHQKILATDVSSKNTPDSKKISSRNINDHHSEADEEFYL
Q03188_180	SVLLDAKTSVSQNVIPSSAQKRETYTFENSVNMLPSSTEVS
Q03188_212	MLPSSTEVSVKTKKRLNFDDKVMLKKIEIDNKVSDEEDKTS
Q03188_217	TEVSVKTKKRLNFDDKVMLKKIEIDNKVSDEEDKTSEGQER
Q03188_238	IEIDNKVSDEEDKTSEGQERKPSGSSQNRIRDSEYEIQRQA
Q03188_260	SGSSQNRIRDSEYEIQRQAKKSFSTLFLETVKRKSESSPIV
Q03188_271	EYEIQRQAKKSFSTLFLETVKRKSESSPIVRHAATAPPHSC
Q03188_273	EIQRQAKKSFSTLFLETVKRKSESSPIVRHAATAPPHSCPP
Q03188_297	SPIVRHAATAPPHSCPPDDTKLIEDEFIIDESDQSFASRSW
Q03188_440	KQRRKFMAKPAEEQLDVGQSKDENIHTSHITQDEFQRNSDR
Q03188_45	DINTEQGQNVLEILQDCFEEKSLANDFSTNSTKSVPNSTRK
Q03188_534	TSTVTKSRRISRRPSDWWVVKSEESPVYSNSSVRNELPMHH
Q03188_677	QTSGYTCNIPTESNLDSGEHKTSVLEESGPSRLNNNYLMSG
Q03188_727	HGSSDDSKQSKVIPKNRIHHKLVLPSNTPNVRRTKRTRLKP
Q03188_807	IGKVNKKSNKKRICLDNDERKTNLMVNLGIPLGDPLQPTRV
Q03252_195	SDVAELRAQLAKAEDGHAVAKKQLEKETLMRVDLENRCQSL
Q03252_255	RRHERRLVEVDSSRQQEYDFKMAQALEELRSQHDEQVRLYK
Q03252_489	SASGSVSIEEIDLEGKFVQLKNNSDKDQSLGNWRIKRQVLE
Q03252_77	LAHYIDRVRALELENDRLLLKISEKEEVTTREVSGIKALYE
Q03252_81	IDRVRALELENDRLLLKISEKEEVTTREVSGIKALYESELA
Q03468_255	AWEELIRTGQMTPFGTQIPQKQEKKPRKIMLNEASGFEKYL
Q03933_135	KPEENKIRQEDLTKIISSAQKVQIKQETIESRLSELKSENE
Q03933_139	NKIRQEDLTKIISSAQKVQIKQETIESRLSELKSENESLWK
Q03933_151	SSAQKVQIKQETIESRLSELKSENESLWKEVSELRAKHAQQ
Q03933_2	XXXXXXXXXXXXXXXXXXXMKQSSNVPAFLSKLWTLVEETH
Q03933_210	QLVSLKRKRPLLLNTNGAQKKNLFQHIVKEPTDNHHHKVPH
Q03933_218	RPLLLNTNGAQKKNLFQHIVKEPTDNHHHKVPHSRTEGLKP
Q03933_237	VKEPTDNHHHKVPHSRTEGLKPRERISDDIIIYDVTDDNAD
Q03933_82	VRQLNMYGFRKVVHIDSGIVKQERDGPVEFQHPYFKQGQDD
Q04695_15	XXXXXXMTTSIRQFTSSSSIKGSSGLGGGSSRTSCRLSGGL
Q04695_278	DQYEKMAEKNRKDAEDWFFSKTEELNREVATNSELVQSGKS
Q04695_399	QEIATYRRLLEGEDAHLTQYKKEPVTTRQVRTIVEEVQDGK
Q04695_400	EIATYRRLLEGEDAHLTQYKKEPVTTRQVRTIVEEVQDGKV
Q04695_419	KKEPVTTRQVRTIVEEVQDGKVISSREQVHQTTRXXXXXXX
Q05519_197	LNSQSLAADQLLKLMSTVDPKLNHVAAGLVSPSLKSDTSSK
Q05519_211	MSTVDPKLNHVAAGLVSPSLKSDTSSKEIEEAMKRVREAQS
Q05682_459	EKGTKVQAKREKLQEDKPTFKKEEIKDEKIKKDKEPKEEVK
Q05682_645	DGLSDDKKPFKCFTPKGSSLKIEERAEFLNKSVQKSSGVKS
Q06265_297	KEGGKFGFAESIANQRITAFKMEKAPIDTSDVEEKAEEIIA
Q06265_419	MIILEPDKNPKKIRTQTTSAKQEKAPSKKPVKRRKKKRAAN
Q06730_180	NYLGKKSDEFNACGKLLLNIKHDETHTQEKNEVLKNRNTLS
Q06730_237	NFEYSICQETLLEKAVFNTQKRENAEENNCDYNEFGRTLCD
Q06730_312	PHGVSMKHYDCGESGNNFRRKLCLSHLQKGDKGEKHFECNE
Q06730_456	GLKPYECYECGKSFRVTSHLKVHQRTHTGEKPFECLECGKS
Q06730_676	RTHTQEKPYKCNECGKSFCVKSGLIFHERKHTGEKPYECNE
Q06730_732	RAHTGEKSCQCNECGKIFYRKSELAQHQRSHTGEKPYECNT
Q06830_120	MNIPLVSDPKRTIAQDYGVLKADEGISFRGLFIIDDKGILR
Q06830_7	XXXXXXXXXXXXXXMSSGNAKIGHPAPNFKATAVMPDGQFK
Q07020_119	KVCALRVTSRARSRILRAGGKILTFDQLALDSPKGCGTVLL
Q07020_164	KGREVYRHFGKAPGTPHSHTKPYVRSKGRKFERARGRRASR
Q07666_102	APTPLLPPSATASVKMEPENKYLPELMAEKDSLDPSFTHAM
Q07666_139	THAMQLLTAEIEKIQKGDSKKDDEENYLDLFSHKNMKLKER
Q07666_175	KLKERVLIPVKQYPKFNFVGKILGPQGNTIKRLQEETGAKI
Q07666_432	GQDDWNGTRPSLKAPPARPVKGAYREHPYGRYXXXXXXXXX
Q07666_96	ATVGGPAPTPLLPPSATASVKMEPENKYLPELMAEKDSLDP
Q07955_30	PAGNNDCRIYVGNLPPDIRTKDIEDVFYKYGAIRDIDLKNR
Q07955_38	IYVGNLPPDIRTKDIEDVFYKYGAIRDIDLKNRRGGPPFAF
Q08050_163	PKPAARDVNLPRPPGALCEQKRETCADGEAAGCTINNSLSN
Q08050_201	LSNIQWLRKMSSDGLGSRSIKQEMEEKENCHLEQRQVKVEE
Q08050_325	VSFWTIHPSANRYLTLDQVFKPLDPGSPQLPEHLESQQKRP
Q08050_356	EHLESQQKRPNPELRRNMTIKTELPLGARRKMKPLLPRVSS
Q08050_422	AASLMSSELARHSKRVRIAPKVLLAEEGIAPLSSAGPGKEE
Q08050_440	APKVLLAEEGIAPLSSAGPGKEEKLLFGEGFSPLLPVQTIK
Q08211_697	GSHRYQILPLHSQIPREEQRKVFDPVPVGVTKVILSTNIAE
Q08945_296	LFSKDEDISLTLNMNEEEVEKRFEGRLTKNMSGSLYEMVSR
Q08945_364	SYKASSGLLYPLERGFIYVHKPPVHIRFDEISFVNFARGTT
Q08945_90	HVYKYDGFRESEFEKLSDFFKTHYRLELMEKDLCVKGWNWG
Q08AF3_59	QNEIILRAVCALLNSGGGIIKAEIENKGYNYERHGVGLDVP
Q08J23_46	GGKRGEAGWEGGYPEIVKENKLFEHYYQELKIVPEGEWGQF
Q08J23_464	GKSAETRESTQLSPADLTEGKPTDPSKLESPSFTGTGDTEI
Q08J23_470	RESTQLSPADLTEGKPTDPSKLESPSFTGTGDTEIAHATED
Q08J23_511	LENNGSKKDGVCGPPPSKKMKLFGFKEDPFVFIPEDDPLFP
Q08J23_516	SKKDGVCGPPPSKKMKLFGFKEDPFVFIPEDDPLFPPIEKF
Q08J23_586	ELRNVLLNNSEKMKVINTGIKVWCRNNSGEEFDCAFRLAQE
Q08J23_640	ITVSMEDVKILLTQENPFFRKLSSETYSQAKDLAKGSIVLK
Q08J23_654	ENPFFRKLSSETYSQAKDLAKGSIVLKYEPDSANPDALQCP
Q08J23_660	KLSSETYSQAKDLAKGSIVLKYEPDSANPDALQCPIVLCGW
Q09028_160	IATKTPSSDVLVFDYTKHPSKPDPSGECNPDLRLRGHQKEG
Q09028_4	XXXXXXXXXXXXXXXXXMADKEAAFDDAVEERVINEEYKIW
Q09161_684	EKLARQHKRRSDDDDRSSDRKDGVLEEQIERLQEKVESAQS
Q0JRZ9_297	SAVEGIKPRKRKTFALPGIIKKEKDAESVECPDADSLNIPD
Q12772_464	FSPYSIDSEPGSPLLDDAKVKDEPDSPPVALGMVDRSRILL
Q12788_407	KGWLFASCAKDQSVRIWRMNKAGQVMCVAQGSGHTHSVGTV
Q12789_1142	SFYGHLKRNWIWTSYIINQAKKENTAAENGLTVRLQTFLSK
Q12789_529	QPHHSTPTKGGWKVVNLHPLKKQPPSFPGAAEERACQSLAS
Q12789_770	DSQLSASSRSESGRMKKSDNKMGITPLRNYHPIVVPGLGRS
Q12789_833	GHPASNTVEKPSFISERRTIKQESGRAGVRPSSSGSAWEAC
Q12824_106	TSVTLLKASEVEEILDGNDEKYKAVSISTEPPTYLREQKAK
Q12824_108	VTLLKASEVEEILDGNDEKYKAVSISTEPPTYLREQKAKRN
Q12824_124	DEKYKAVSISTEPPTYLREQKAKRNSQWVPTLPNSSHHLDA
Q12824_161	HLDAVPCSTTINRNRMGRDKKRTFPLCFDDHDPAVIHENAS
Q12888_1365	EPADFALPSSRGGPGKLSPRKGVSQTGTPVCEEDGDAGLGI
Q12888_1434	TAVPGPLGIEDISPNLSPDDKSFSRVVPRVPDSTRRTDVGA
Q12888_1563	EVTALSEDEYFSAGVVKGHRKESGELYYSIEKEGQRKWYKR
Q12888_217	SVTTNSGYTRLSDVDANTAIKHEEQSNEDIPIAEQSSKDIP
Q12888_868	QELQQPQTQEKTSNSLTEDSKMANAKQLSSDAEAQKLGKPS
Q12888_930	KEGDIIPPLTGATPPLIGHLKLEPKRHSTPIGISNYPESTI
Q12888_984	HDPILGSGKGDSGAAPDVDDKLCLRMKLVSPETEASEESLQ
Q12905_186	ISSSDATVKILITTVPPNLRKLDPELHLDIKVLQSALAAIR
Q12905_364	STWDGVIVTPSEKAYEKPPEKKEGEEEEENTEEPPQGEEEE
Q12906_396	EDGEEKSPSKKKKKIQKKEEKAEPPQAMNALMRLNQLKPGL
Q12906_489	TGAEGRDSSKGEDSAEETEAKPAVVAPAPVVEAVSTPSAAF
Q13029_1147	QETFNKNFVCNVCESPFLSIKDLTKHLSIHAEEWPFKCEFC
Q13029_1151	NKNFVCNVCESPFLSIKDLTKHLSIHAEEWPFKCEFCVQLF
Q13029_1257	PSKAHVEHMQSLPEDPLETSKEEEELNDSSEELYTTIKIMA
Q13029_1281	ELNDSSEELYTTIKIMASGIKTKDPDVRLGLNQHYPSFKPP
Q13029_347	SEETLEDCSEVTPAMQIPRTKEEANGDVFETFMFPCQHCER
Q13029_651	STNSEAKKRRTASPPALPKIKAETDSDPMVPSCSLSLPLSI
Q13029_690	SISTTEAVSFHKEKSVYLSSKLKQLLQTQDKLTPAGISATE
Q13029_692	STTEAVSFHKEKSVYLSSKLKQLLQTQDKLTPAGISATEIA
Q13029_774	GKPSDGKAAWTDAGLTSKKSKLESHSDSPAWSLSGRDERET
Q13029_866	SVLDLSVHKKHCSDSEGKEFKESHSVQPTCSAVKKRKPTTC
Q13029_879	DSEGKEFKESHSVQPTCSAVKKRKPTTCMLQKVLLNEYNGI
Q13111_182	KAIQNDKLAFPGETLSDIPCKTEEEGVGCGGAGRRGDSQEC
Q13123_151	PTAEADKSAAEKRRQLIQESKFLGGDMEHTHLVKGLDFALL
Q13123_310	RQGTRNKKLKKKDKGKLEEKKPPEADMNIFEDIGDYVPSTT
Q13123_331	PPEADMNIFEDIGDYVPSTTKTPRDKERERYRERERDRERD
Q13123_386	RERERDREREEEKKRHSYFEKPKVDDEPMDVDKGPGSTKEL
Q13123_388	RERDREREEEKKRHSYFEKPKVDDEPMDVDKGPGSTKELIK
Q13123_404	FEKPKVDDEPMDVDKGPGSTKELIKSINEKFAGSAGWEGTE
Q13123_408	KVDDEPMDVDKGPGSTKELIKSINEKFAGSAGWEGTESLKK
Q13123_496	GPLGRWDFDTQEEYSEYMNNKEALPKAAFQYGIKMSEGRKT
Q13123_501	WDFDTQEEYSEYMNNKEALPKAAFQYGIKMSEGRKTRRFKE
Q13123_509	YSEYMNNKEALPKAAFQYGIKMSEGRKTRRFKETNDKAELD
Q13123_541	ETNDKAELDRQWKKISAIIEKRKKMEADGVEVKRPKYXXXX
Q13123_543	NDKAELDRQWKKISAIIEKRKKMEADGVEVKRPKYXXXXXX
Q13123_544	DKAELDRQWKKISAIIEKRKKMEADGVEVKRPKYXXXXXXX
Q13123_553	KKISAIIEKRKKMEADGVEVKRPKYXXXXXXXXXXXXXXXX
Q13129_1423	SAARFSCNQPQCPAVFYTFNKLKHHLMEQHNIEGEIHSDYE
Q13129_1599	AYLEQQMENLVVCVKYGTKIKEEPPSEADPCIKKEENRSCE
Q13129_1611	CVKYGTKIKEEPPSEADPCIKKEENRSCESERTEHSHSPGD
Q13129_1696	HSSKTTSLEQCNIVQPPPPCKIENSIPNPNGTESGTYFTSF
Q13129_1762	PTHVPKENFRKHSQPRSFDLKTYKPMGFESSFLKFIQESEE
Q13129_622	MEHVKMPPSRRDRSKKKLLLKGSQKGICPKSPSAIPEQNHS
Q13129_839	QNHLSMHNVENSNGDIKKSVKLEESATGEKQDCINQPHLLN
Q13148_102	KRKMDETDASSAVKVKRAVQKTSDLIVLGLPWKTTEQDLKE
Q13148_181	VMSQRHMIDGRWCDCKLPNSKQSQDEPLRSRKVFVGRCTED
Q13148_263	LCGEDLIIKGISVHISNAEPKHNSNRQLERSGRFGGNPGGF
Q13148_79	GILHAPDAGWGNLVYVVNYPKDNKRKMDETDASSAVKVKRA
Q13148_84	PDAGWGNLVYVVNYPKDNKRKMDETDASSAVKVKRAVQKTS
Q13148_95	VNYPKDNKRKMDETDASSAVKVKRAVQKTSDLIVLGLPWKT
Q13151_106	EDSARPGAHAKVKKLFVGGLKGDVAEGDLIEHFSQFGTVEK
Q13151_154	QSGKKRGFGFVYFQNHDAADKAAVVKFHPIQGHRVEVKKAV
Q13151_159	RGFGFVYFQNHDAADKAAVVKFHPIQGHRVEVKKAVPKEDI
Q13151_172	ADKAAVVKFHPIQGHRVEVKKAVPKEDIYSGGGGGGSRSSR
Q13151_176	AVVKFHPIQGHRVEVKKAVPKEDIYSGGGGGGSRSSRGGRG
Q13151_80	EADAAMAASPHAVDGNTVELKRAVSREDSARPGAHAKVKKL
Q13151_96	TVELKRAVSREDSARPGAHAKVKKLFVGGLKGDVAEGDLIE
Q13151_98	ELKRAVSREDSARPGAHAKVKKLFVGGLKGDVAEGDLIEHF
Q13151_99	LKRAVSREDSARPGAHAKVKKLFVGGLKGDVAEGDLIEHFS
Q13185_10	XXXXXXXXXXXMASNKTTLQKMGKKQNGKSKKVEEAEPEEF
Q13185_103	GKEKDGTKRKSLSDSESDDSKSKKKRDAADKPRGFARGLDP
Q13185_154	GELMFLMKWKDSDEADLVLAKEANMKCPQIVIAFYEERLTW
Q13185_21	MASNKTTLQKMGKKQNGKSKKVEEAEPEEFVVEKVLDRRVV
Q13185_5	XXXXXXXXXXXXXXXXMASNKTTLQKMGKKQNGKSKKVEEA
Q13206_649	EEEDADFLKVKRHNVFGLDLKDEKTLQKKEPSKSSIKKKMT
Q13242_36	IYVGNLPTDVREKDLEDLFYKYGRIREIELKNRHGLVPFAF
Q13247_182	ALDKLDGTEINGRNIRLIEDKPRTSHRRSYSGSRSRSRSRR
Q13263_127	GAAGDGTVVDCPVCKQQCFSKDIVENYFMRDSGSKAATDAQ
Q13263_199	EAHQRVKYTKDHTVRSTGPAKSRDGERTVYCNVHKHEPLVL
Q13263_254	LNAHKDHQYQFLEDAVRNQRKLLASLVKRLGDKHATLQKST
Q13263_261	QYQFLEDAVRNQRKLLASLVKRLGDKHATLQKSTKEVRSSI
Q13263_272	QRKLLASLVKRLGDKHATLQKSTKEVRSSIRQVSDVQKRVQ
Q13263_304	VSDVQKRVQVDVKMAILQIMKELNKRGRVLVNDAQKVTEGQ
Q13263_31	AAASAASGSPGPGEGSAGGEKRSTAPSAAASASASAAASSP
Q13263_319	ILQIMKELNKRGRVLVNDAQKVTEGQQERLERQHWTMTKIQ
Q13263_366	LRFASWALESDNNTALLLSKKLIYFQLHRALKMIVDPVEPH
Q13263_377	NNTALLLSKKLIYFQLHRALKMIVDPVEPHGEMKFQWDLNA
Q13263_407	GEMKFQWDLNAWTKSAEAFGKIVAERPGTNSTGPAPMAPPR
Q13263_434	GTNSTGPAPMAPPRAPGPLSKQGSGSSQPMEVQEGYGFGSG
Q13263_469	YGFGSGDDPYSSAEPHVSGVKRSRSGEGEVSGLMRKVPRVS
Q13263_507	RVSLERLDLDLTADSQPPVFKVFPGSTTEDYNLIVIERGAA
Q13263_554	PGTAPAGTPGAPPLAGMAIVKEEETEAAIGAPPTATEGPET
Q13263_575	EEETEAAIGAPPTATEGPETKPVLMALAEGPGAEGPRLASP
Q13263_750	SLDQPGGTLDLTLIRARLQEKLSPPYSSPQEFAQDVGRMFK
Q13263_770	KLSPPYSSPQEFAQDVGRMFKQFNKLTEDKADVQSIIGLQR
Q13263_774	PYSSPQEFAQDVGRMFKQFNKLTEDKADVQSIIGLQRFFET
Q13263_779	QEFAQDVGRMFKQFNKLTEDKADVQSIIGLQRFFETRMNEA
Q13263_804	SIIGLQRFFETRMNEAFGDTKFSAVLVEPPPMSLPGAGLSS
Q13283_376	LKDFFQSYGNVVELRINSGGKLPNFGFVVFDDSEPVQKVLS
Q13310_361	SSPEEATKAVTEMNGRIVGSKPLYVALAQRKEERKAHLTNQ
Q13310_375	GRIVGSKPLYVALAQRKEERKAHLTNQYMQRVAGMRALPAN
Q13330_549	AVRKPLEAVLRYLETHPRPPKPDPVKSVSSVLSSLTPAKVA
Q13352_22	PVKRSLKLDGLLEENSFDPSKITRKKSVITYSPTTGTCQMS
Q13352_8	XXXXXXXXXXXXXMPVKRSLKLDGLLEENSFDPSKITRKKS
Q13356_216	YLKNTNAETRETLQELYKEFKGDEILAATMKAPEKKKVDKL
Q13427_392	MRVSSGERWIKGDKSELNEIKENQRSPVRVKERKITDHRNV
Q13427_693	SSNNSREKKADRDQSPFSKIKQSSQDNELKSSMLKNKEDEK
Q13428_1224	SGYMTPGLTPANSQASKATPKLDSSPSVSSTLAAKDDPDGK
Q13428_1238	ASKATPKLDSSPSVSSTLAAKDDPDGKQEAKPQQAAGMLSP
Q13428_1248	SPSVSSTLAAKDDPDGKQEAKPQQAAGMLSPKTGGKEAASG
Q13428_126	ASTNSSVLGADLPSSMKEKAKAETEKAGKTGNSMPHPATGK
Q13428_1414	KASGDVKEKKGKGSLGSQGAKDEPEEELQKGMGTVEGGDQS
Q13428_507	EALAAMNAAQVKPLGKSPQVKPASTMGMGPLGKGAGPVPPG
Q13428_600	PTSSPAKGPPQKAGPVAVQVKAEKPMDNSESSEESSDSADS
Q13428_637	SADSEEAPAAMTAAQAKPALKIPQTKACPKKTNTTASAKVA
Q13428_725	KTGLAVTVGQAKSVGKGLQVKAASVPVKGSLGQGTAPVLPG
Q13428_732	VGQAKSVGKGLQVKAASVPVKGSLGQGTAPVLPGKTGPTVT
Q13428_755	LGQGTAPVLPGKTGPTVTQVKAEKQEDSESSEEESDSEEAA
Q13435_10	XXXXXXXXXXXMATEHPEPPKAELQLPPPPPPGHYGAWAAQ
Q13435_280	MDDPSVGPKIPQALEKILQLKESRQEEMNSQQEEEEMETDA
Q13435_400	EPNFIFFKRIFEAFKLTDDVKKEKEKEPEKLDKLENSAAPK
Q13435_412	AFKLTDDVKKEKEKEPEKLDKLENSAAPKKKGFEEEHKDSD
Q13435_492	PDVVEMHDVTAQDPKLLVHLKATRNSVPVPRHWCFKRKYLQ
Q13435_543	ELPDFIKRTGIQEMREALQEKEEQKTMKSKMREKVRPKMGK
Q13435_770	GFSSVPAGMETPELIELRKKKIEEAMDGSETPQLFTVLPEK
Q13435_790	KIEEAMDGSETPQLFTVLPEKRTATVGGAMMGSTHIYDMST
Q13435_843	GVEVALAPEELELDPMAMTQKYEEHVREQQAQVEKEDFSDM
Q13435_857	PMAMTQKYEEHVREQQAQVEKEDFSDMVAEHAAKQKQKKRK
Q13442_52	QKAREEEEQKEGGDGAAGDPKKEKKSLDSDESEDEEDDYQQ
Q13485_113	VIYARLWRWPDLHKNELKHVKYCQYAFDLKCDSVCVNPYHY
Q13492_238	LLEKYFDMKKNQCKEGLDIYKKFLTRMTRISEFLKVAEQVG
Q13501_435	RLLQTKNYDIGAALDTIQYSKHPPPLXXXXXXXXXXXXXXX
Q13506_126	WLGISCSSYERSSNAREPHLKIPKCAATTCVQSLGQGKSDV
Q13506_129	ISCSSYERSSNAREPHLKIPKCAATTCVQSLGQGKSDVVGS
Q13506_143	PHLKIPKCAATTCVQSLGQGKSDVVGSLALQSVGESRLWQG
Q13506_212	DAAAALSVAECVERMAPTLPKSDLNEVKELLKTNKKLAKMI
Q13506_333	TYRTTKSKCGERDELSPKRIKVEDGFPDFQDSVQTLFQQAR
Q13506_355	EDGFPDFQDSVQTLFQQARAKSEELAALSSQQPEKVMAKQM
Q13506_369	FQQARAKSEELAALSSQQPEKVMAKQMEFLCNQAGYERLQH
Q13506_373	RAKSEELAALSSQQPEKVMAKQMEFLCNQAGYERLQHAERR
Q13506_454	RQPHHFVVDGELSRLYPSEAKSHSSESLGILKDYPHSAFTL
Q13506_465	LSRLYPSEAKSHSSESLGILKDYPHSAFTLEKKVIKTEPED
Q13506_477	SSESLGILKDYPHSAFTLEKKVIKTEPEDSRXXXXXXXXXX
Q13506_480	SLGILKDYPHSAFTLEKKVIKTEPEDSRXXXXXXXXXXXXX
Q13523_111	GMSPAKRTKLDDLALLEDLEKQRALIKAELDNELMEGKVQS
Q13523_117	RTKLDDLALLEDLEKQRALIKAELDNELMEGKVQSGMGLIL
Q13523_170	IHEKARNGNRSSTRSSSTKGKLELVDNKITTKKRSKSRSKE
Q13523_177	GNRSSTRSSSTKGKLELVDNKITTKKRSKSRSKERTRHRSD
Q13523_593	STRTRSPSPDDILERVAADVKEYERENVDTFEASVKAKHNL
Q13523_659	MFAAYFDSARLRAAGIGKDFKENPNLRDNWTDAEGYYRVNI
Q13523_99	KRKEIIDASDKEGMSPAKRTKLDDLALLEDLEKQRALIKAE
Q13569_103	KKSGKSAKSKEKQEKITDTFKVKRKVDRFNGVSEAELLTKT
Q13569_248	VFNGKCIYEIFSKEVFGVKVKNLEFGLQPHKIPDTETLCYV
Q13569_330	EVQYTFDLQLAQEDAKKMAVKEEKYDPGYEAAYGGAYGENP
Q13573_115	KIKYDAIARQGQSKDKVIYSKYTDLVPKEVMNADDPDLQRP
Q13573_122	ARQGQSKDKVIYSKYTDLVPKEVMNADDPDLQRPDEEAIKE
Q13573_141	PKEVMNADDPDLQRPDEEAIKEITEKTRVALEKSVSQKVAA
Q13573_158	EAIKEITEKTRVALEKSVSQKVAAAMPVRAADKLAPAQYIR
Q13573_170	ALEKSVSQKVAAAMPVRAADKLAPAQYIRYTPSQQGVAFNS
Q13573_193	PAQYIRYTPSQQGVAFNSGAKQRVIRMVEMQKDPMEPPRFK
Q13573_23	LTSFLPAPTQLSQDQLEAEEKARSQRSRQTSLVSSRREPPP
Q13573_240	RGPPSPPAPVMHSPSRKMTVKEQQEWKIPPCISNWKNAKGY
Q13573_258	TVKEQQEWKIPPCISNWKNAKGYTIPLDKRLAADGRGLQTV
Q13573_286	KRLAADGRGLQTVHINENFAKLAEALYIADRKAREAVEMRA
Q13573_339	KHEEKLREMAQKARERRAGIKTHVEKEDGEARERDEIRHDR
Q13573_344	LREMAQKARERRAGIKTHVEKEDGEARERDEIRHDRRKERQ
Q13573_416	VPNPRTSNEVQYDQRLFNQSKGMDSGFAGGEDEIYNVYDQA
Q13573_441	GFAGGEDEIYNVYDQAWRGGKDMAQSIYRPSKNLDKDMYGD
Q13573_452	VYDQAWRGGKDMAQSIYRPSKNLDKDMYGDDLEARIKTNRF
Q13573_509	EGPVQFEEDPFGLDKFLEEAKQHGGSKRPSDSSRPKEHEHE
Q13573_81	GGAFPEIHVAQYPLDMGRKKKMSNALAIQVDSEGKIKYDAI
Q13573_97	GRKKKMSNALAIQVDSEGKIKYDAIARQGQSKDKVIYSKYT
Q13595_198	ERANGMELDGRRIRVDYSITKRAHTPTPGIYMGRPTHSGGG
Q13601_24	PSLERPEKGAGKSEFRNQKPKPENQDESELLTVPDGWKEPA
Q13601_340	AFIPPKEKPIVKPKEASTETKIDVASIKEKVKKAKNKKLGA
Q13601_369	KVKKAKNKKLGALTAEEIALKMEADEKKKKKKKXXXXXXXX
Q13642_86	FRCAKCLHPLANETFVAKDNKILCNKCTTREDSPKCKGCFK
Q13761_192	VTVDGPREPRRHRQKLEDQTKPFPDRFGDLERLRMRVTPST
Q13765_142	VFGEAKIEDLSQQAQLAAAEKFKVQGEAVSNIQENTQTPTV
Q13769_153	LLYEVMHLQKEITKCLEFKSKHEEIDLVSLEEFYKEAPPDI
Q13838_36	DEVETAAGGDGAEAPAKKDVKGSYVSIHSSGFRDFLLKPEL
Q13887_110	CEMEKYLTPQLPPVPIIPEHKKYRRDSASVVDQFFTDTEGL
Q13887_31	RLGPVPQPPAPQDEPVFAQLKPVLGAANPARDAALFPGEEL
Q13887_52	PVLGAANPARDAALFPGEELKHAHHRPQAQPAPAQAPQPAQ
Q13887_94	PATGPRLPPEDLVQTRCEMEKYLTPQLPPVPIIPEHKKYRR
Q13901_119	EITDKKKAGKLDRGAASRFVKNALWEPKSKNASKVANKGKS
Q13901_126	AGKLDRGAASRFVKNALWEPKSKNASKVANKGKSKSXXXXX
Q13901_132	GAASRFVKNALWEPKSKNASKVANKGKSKSXXXXXXXXXXX
Q13950_238	KVTVDGPREPRRHRQKLDDSKPSLFSDRLSDLGRIPHPSMR
Q14004_519	NTETSASASQTNHVKDVKKIKIEHAPSPSSGGTLKNDKAKT
Q14004_547	SSGGTLKNDKAKTKPPLQVTKVENNLIVDKATKKAVIVGKE
Q14103_129	TKKDLKDYFSKFGEVVDCTLKLDPITGRSRGFGFVLFKESE
Q14103_197	TKEPVKKIFVGGLSPDTPEEKIREYFGGFGEVESIELPMDN
Q14103_72	ASGGTEGGSAESEGAKIDASKNEEDEGHSNSSPRHSEAATA
Q14149_191	EHSLFSTEQKLLAELDAIIGKKGTRIIIWNLRSYKNATEFD
Q14149_205	LDAIIGKKGTRIIIWNLRSYKNATEFDFEKDKYDIRIPEDL
Q14149_231	DFEKDKYDIRIPEDLDEITGKKGYKKQERMDQIAPESDYSL
Q14149_280	LKPRMQIILRGQKVKTQLVSKSLAYIERDVYRPKFLSKTVR
Q14149_293	VKTQLVSKSLAYIERDVYRPKFLSKTVRITFGFNCRNKDHY
Q14149_555	EPESNSLKRRLSTRSSILNAKNRRLSSQFENSVYKGDDDDE
Q14149_597	VIILEENSTPKPAVDHDIDMKSEQSHVEQGGVQVEFVGDSE
Q14149_650	SRCDQGNTAATQTEVPSLVVKKEETVEDEIDVRNDAVILPS
Q14149_651	RCDQGNTAATQTEVPSLVVKKEETVEDEIDVRNDAVILPSC
Q14149_740	FTDQIKVLQQRILEMNDKYVKKETCHQSTETDAVFLLESIN
Q14149_794	QQALEEIERLKKQCSALQHVKAECSQCSNNESKSEMDEMAV
Q14149_855	SEVELLEMEKSQIRSQCEELKTEVEQLKSTNQQTATDVSTS
Q14151_188	AQLRQLPAQPPEHAVDGEGFKNTLETSSLNFKVTPDIEESL
Q14151_199	EHAVDGEGFKNTLETSSLNFKVTPDIEESLLEPENEKILDI
Q14151_380	ACNEVPPAPKESSTSEGADQKMSSFKEEKDIKPIIKDEKGR
Q14151_385	PPAPKESSTSEGADQKMSSFKEEKDIKPIIKDEKGRVGSGS
Q14151_388	PKESSTSEGADQKMSSFKEEKDIKPIIKDEKGRVGSGSGRN
Q14151_391	SSTSEGADQKMSSFKEEKDIKPIIKDEKGRVGSGSGRNLWV
Q14151_395	EGADQKMSSFKEEKDIKPIIKDEKGRVGSGSGRNLWVSGLS
Q14151_517	ECEVKKEKLSSVDRHHSVEIKIEKTVIKKEEKIEKKEEKKP
Q14151_524	KLSSVDRHHSVEIKIEKTVIKKEEKIEKKEEKKPEDIKKEE
Q14151_525	LSSVDRHHSVEIKIEKTVIKKEEKIEKKEEKKPEDIKKEEK
Q14151_541	TVIKKEEKIEKKEEKKPEDIKKEEKDQDELKPGPTNRSRVT
Q14151_542	VIKKEEKIEKKEEKKPEDIKKEEKDQDELKPGPTNRSRVTK
Q14151_551	KKEEKKPEDIKKEEKDQDELKPGPTNRSRVTKSGSRGMERT
Q14151_578	SRVTKSGSRGMERTVVMDKSKGEPVISVKTTSRSKERSSKS
Q14151_586	RGMERTVVMDKSKGEPVISVKTTSRSKERSSKSQDRKSESK
Q14151_608	TSRSKERSSKSQDRKSESKEKRDILSFDKIKEQRERERQRQ
Q14151_616	SKSQDRKSESKEKRDILSFDKIKEQRERERQRQREREIRET
Q14151_65	RNLDTGGNKSVLMERLKKAVKEEGQDPDEIGIELEATSKKS
Q14151_94	IGIELEATSKKSAKRCVKGLKMEEEGTEDNGLEDDSRDGQE
Q14191_154	KKAGVGIEGDQWKLLRDFDIKLKNFVELTDVANKKLKCTET
Q14191_241	FIIYRNLEILDDTVQRFAINKEEEILLSDMNKQLTSISEEV
Q14191_252	DTVQRFAINKEEEILLSDMNKQLTSISEEVMDLAKHLPHAF
Q14192_167	QNFCVPCYEKQHAMQCVQCKKPITTGGVTYREQPWHKECFV
Q14192_220	FTARDDFAYCLNCFCDLYAKKCAGCTNPISGLGGTKYISFE
Q14192_78	DRHWHEACFHCSQCRNSLVDKPFAAKEDQLLCTDCYSNEYS
Q14202_1275	IRYYAPVRQRKGRDTGPGKRKREDEAPILEQRENRMNPLRC
Q14202_308	PRMSLRSSVSQRAGRSAVGTKMTCAHCRTPLQKGQTAYQRK
Q14202_320	AGRSAVGTKMTCAHCRTPLQKGQTAYQRKGLPQLFCSSSCL
Q14202_328	KMTCAHCRTPLQKGQTAYQRKGLPQLFCSSSCLTTFSKKPS
Q14202_778	PNLDTQSGPESLLNSQSPESKPQTPSQTKVENSNTVRTPEE
Q14202_786	PESLLNSQSPESKPQTPSQTKVENSNTVRTPEENGNLGKIP
Q14202_804	QTKVENSNTVRTPEENGNLGKIPVKTRSAPTAPTPPPPPPP
Q14202_847	PRKNKAAMCKPLMQNRGVSCKVEMKSKGSQTEEWKPQVIVL
Q14202_861	NRGVSCKVEMKSKGSQTEEWKPQVIVLPIPVPIFVPVPMHL
Q14202_920	MFLPTTLESTDKIVETIEELKVKIPSNPLEADILAMAEMIA
Q14207_1116	PNLDSPNVSSTLKPPSNNAIKREKEKPPLPKILSKSESAIS
Q14207_1149	SKSESAISRHTTIRETQSEKKVSPTEIVLESFHKATANKEN
Q14207_1280	ADSSDLPVPRTPGSGAGEKHKEEPIDIIKAPSSRRFSEDSS
Q14244_273	CSPIIMPYKAAHSRNSMDRPKLFVTPPEGSSRRRIIHGTAS
Q14244_295	FVTPPEGSSRRRIIHGTASYKKERERENVLFLTSGTRRAVS
Q14244_373	SVKAAPAQVRPPSPGNIRPVKREVKVEPEKKDPEKEPQKVA
Q14244_377	APAQVRPPSPGNIRPVKREVKVEPEKKDPEKEPQKVANEPS
Q14244_406	EKEPQKVANEPSLKGRAPLVKVEEATVEERTPAEPEVGPAA
Q14247_144	KFGVQMDRVDQSAVGFEYQGKTEKHASQKDYSSGFGGKYGV
Q14247_181	KYGVQADRVDKSAVGFDYQGKTEKHESQRDYSKGFGGKYGI
Q14247_295	VQSERQDSAAVGFDYKEKLAKHESQQDYSKGFGGKYGVQKD
Q14320_100	LVKEREKQLAKKEQSKELQMKLEKLREKERKKEAKRKISSL
Q14432_1120	ENQSLDQTPQSHSSEQIQAIKEEEEEKGKPRGEEIPTQKPD
Q14493_98	AVEEDEMRTRVNKEMARYKRKLLINDFGRERKSSSGSSDSK
Q14498_111	FRGRYRSPYSGPKFNSAIRGKIGLPHSIKLSRRRSRSKSPF
Q14498_119	YSGPKFNSAIRGKIGLPHSIKLSRRRSRSKSPFRKDKSPVR
Q14498_244	IVQASQAEKNRAAAMANNLQKGSAGPMRLYVGSLHFNITED
Q14527_112	PYDKNAIKVNNVNGNQVGHLKKELAGALAYIMDNKLAQIEG
Q14527_211	AGPSYSMPVHAAVQMTTEQLKTEFDKLFEDLKEDDKTHEME
Q14562_140	PVLCQPDNPSVRTMLDEDDVKVAVDVLKELEALMPSAAGQE
Q14562_399	PEVEDDSLERKRLTRISDPEKWEIKQMIAANVLSKEEFPDF
Q14586_135	KRWKREECEGHNGCYDEKTFKYDQFDESSVESLFHQQILSS
Q14586_66	VVSKPDLITFLEQRKEPWNVKSEETVAIQPDVFSHYNKDLL
Q14592_117	DGPSEMQEYFLRPGTDPQSEKLHGKMSLEHEGLATADGICS
Q14592_194	EEMFNENCFLVQHEQILPRVKPYDCPECGKAFGKSKHLLQH
Q14592_203	LVQHEQILPRVKPYDCPECGKAFGKSKHLLQHHIIHTGEKP
Q14592_207	EQILPRVKPYDCPECGKAFGKSKHLLQHHIIHTGEKPYKCL
Q14592_209	ILPRVKPYDCPECGKAFGKSKHLLQHHIIHTGEKPYKCLEC
Q14592_250	GKDFNRRSHLTRHQRTHNGDKPFVCSECGRTFNRGSHLTRH
Q14592_278	GRTFNRGSHLTRHQRVHSGEKPFVCNECGKAFTYRSNFVLH
Q14592_287	LTRHQRVHSGEKPFVCNECGKAFTYRSNFVLHNKSHNEKKP
Q14592_300	FVCNECGKAFTYRSNFVLHNKSHNEKKPFACSECGKGFYES
Q14592_305	CGKAFTYRSNFVLHNKSHNEKKPFACSECGKGFYESTALIQ
Q14592_306	GKAFTYRSNFVLHNKSHNEKKPFACSECGKGFYESTALIQH
Q14592_362	GKAFNCRSHLKQHERIHTGEKPFVCSQCGKAFTHYSTYVLH
Q14592_371	LKQHERIHTGEKPFVCSQCGKAFTHYSTYVLHERAHTGEKP
Q14592_446	GKAFTRMSGLTRHQWIHTGEKPYVCIQCGKAFCRTTNLIRH
Q14592_455	LTRHQWIHTGEKPYVCIQCGKAFCRTTNLIRHFSIHTGEKP
Q14676_1413	RGRKNRSSGKTPETLVPTAPKLEPSTSTDQPVTPEPTSQAT
Q14676_1740	CIKRQRAAGNPGSLAAPIDHKPCSAPLEPKSQASRNQRWGA
Q14676_1790	IPEPASPQLLETPIHASQIQKVEPAGRSRFTPELQPKASQS
Q14676_1840	SPPHQKQPQRGEVSQKTVIIKEEEEDTAEKPGKEEDVVTPK
Q14676_616	RKSQLPAEGDAGAEWAAAVLKQERAHEVGAQGGPPVAQVEQ
[truncated: 2,857 more rows]
