# Supplementary material for: An application of topological data analysis in predicting sumoylation sites
Source: PeerJ. 2023 Oct 12;11:e16204. doi: 10.7717/peerj.16204 (PMC10576966; doi:10.7717/peerj.16204)
Supplement: Supplemental Information 6 [file peerj-11-16204-s006.xlsx]

## Sheet: Sheet1
ue_pos	seq
B7ZR65_253	GPPTPPTTPKTDIQPGKPDLKREGRPLQENGRQPPHIDFRD
B7ZR65_365	QHSLSTLNSEQSQSQQRTHIKTEQLSPSHYSDQQQQHSPQQ
B7ZR65_61	SDTENTRPQENTFPKGDQELKKETEDEKFPVCIREAVSQVL
H2L0N8_239	ELALRIRQEEAKEQRRLMQMKVEHDALKADVAGLELRNQPP
H2L0N8_331	NFCRISQTSTKPVSPESNSVKEEPTIILKDNYFLPPKAPGR
O00180_274	LLGLIAMLVVLETFCELHELKKFRKMFYVKKDKDEDQVHII
O00232_92	KMCYEAKEWDLLNENIMLLSKRRSQLKQAVAKMVQQCCTYV
O00257_494	DLRCVKTRSEAGEPPSSLQVKPETPASAAVAVAAAAAPTTT
O00327_259	LCSGARRSFFCRMKCNRPSVKVEDKDFPSTCSKKKADRKSF
O00422_13	XXXXXXXXMAVESRVTQEEIKKEPEKPIDREKTCPLLLRVF
O00429_38	VGADIIQLPQIVVVGTQSSGKSSVLESLVGRDLLPRGTGIV
O00429_532	IEEQRRNRLARELPSAVSRDKSSKVPSALAPASQEPSPAAS
O00429_535	QRRNRLARELPSAVSRDKSSKVPSALAPASQEPSPAASAEA
O00429_558	SALAPASQEPSPAASAEADGKLIQDSRRETKNVASGGGGVG
O00429_568	SPAASAEADGKLIQDSRRETKNVASGGGGVGDGVQEPTTGN
O00429_594	GGGVGDGVQEPTTGNWRGMLKTSKAEELLAEEKSKPIPIMP
O00429_597	VGDGVQEPTTGNWRGMLKTSKAEELLAEEKSKPIPIMPASP
O00429_606	TGNWRGMLKTSKAEELLAEEKSKPIPIMPASPQKGHAVNLL
O00429_608	NWRGMLKTSKAEELLAEEKSKPIPIMPASPQKGHAVNLLDV
O00482_173	LEAVRADRMRGGRNKFGPMYKRDRALKQQKKALIRANGLKL
O00541_517	AALEEQRMEGKKPRVMAGTLKLEDKQRLAQEEESEAKRLAI
O13351_14	XXXXXXXMSESPSANISDADKSAITPTTGDTSQQDVKPSTE
O13351_30	SDADKSAITPTTGDTSQQDVKPSTEHINLKVVGQDNNEVFF
O14503_159	QEMFCSGFQTCAREVLQYLAKHENTRDLKSSQLVTHLHRVV
O14503_279	PCFKSDHGRRFTMGERIGAIKQESEEPPTKKNRMQLSDDEG
O15169_857	FEEVREDEAVLPVFEEKIIGKVEKVDXXXXXXXXXXXXXXX
O15169_860	VREDEAVLPVFEEKIIGKVEKVDXXXXXXXXXXXXXXXXXX
O15265_257	PMHPIQQSRVPHGRIMTPSVKVEKIHPKMDGTLLKSAVGPT
O15446_270	TKKRKKPKGKETFEPEDKTVKQEQINTEPLEDTVLSPTKKR
O15525_14	XXXXXXXMTTPNKGNKALKVKREPGENGTSLTDEELVTMSV
O35426-2_276	TKPLVLEIPSETESQTNVVVKIEEAPLSSSEEDHPEFIVSV
O35426-2_297	IEEAPLSSSEEDHPEFIVSVKKEPLEDDFIPELGISNLLSS
O35615_469	TRVPPQNGGSSESPAAPRTIKVEAAEEPEATRASGPGEPGP
O35615_507	PGPQAPSRTPSPHSPNPVRVKTELSSPTPGSSPGPGELTMA
O42934_198	VEMILDSRMKKDGSGFQYYLKWEGYDDPSDNTWNDEEDCAG
O43290_141	EETNKLRAKLGLKPLEVNAIKKEAGTKEEPVTADVINPMAL
O43290_94	ARSSTHGRERSQAEPSERRVKREKRDDGYEAAASSKTSSGD
O43795_287	EAESVLAVVAAVLKLGNIEFKPESRVNGLDESKIKDKNELK
O60016_109	QHQTSKSVPRSQRFSRELNVKKENKKVFSSQTTKRQSRKQS
O60016_160	ILDDSLHTNSKKLGKTRNEVKEESQKRELVSNSIKEATSPK
O60216_216	EQSTSNLNEKINHLEYEDQYKDDNFGEGNDGGILDDKLISN
O60216_317	VPNEEEAFALEPIDITVKETKAKRKRKLIVDSVKELDSKTI
O60216_319	NEEEAFALEPIDITVKETKAKRKRKLIVDSVKELDSKTIRA
O60216_321	EEAFALEPIDITVKETKAKRKRKLIVDSVKELDSKTIRAQL
O60216_323	AFALEPIDITVKETKAKRKRKLIVDSVKELDSKTIRAQLSD
O60216_330	DITVKETKAKRKRKLIVDSVKELDSKTIRAQLSDYSDIVTT
O60216_335	ETKAKRKRKLIVDSVKELDSKTIRAQLSDYSDIVTTLDLAP
O60216_358	RAQLSDYSDIVTTLDLAPPTKKLMMWKETGGVEKLFSLPAQ
O60216_359	AQLSDYSDIVTTLDLAPPTKKLMMWKETGGVEKLFSLPAQP
O60216_364	YSDIVTTLDLAPPTKKLMMWKETGGVEKLFSLPAQPLWNNR
O60216_371	LDLAPPTKKLMMWKETGGVEKLFSLPAQPLWNNRLLKLFTR
O60216_387	GGVEKLFSLPAQPLWNNRLLKLFTRCLTPLVPEDLRKRRKG
O60216_403	NRLLKLFTRCLTPLVPEDLRKRRKGGEADNLDEFLKEFENP
O60216_406	LKLFTRCLTPLVPEDLRKRRKGGEADNLDEFLKEFENPEVP
O60216_418	PEDLRKRRKGGEADNLDEFLKEFENPEVPREDQQQQHQQRD
O60315_391	NKLENGKPLSMSEQTGLLKIKTEPLDFNDYKVLMATHGFSG
O60315_866	HNSVSSSSENSDEPLNLTFIKKEFSNSNNLDNKSTNPVFSM
O60479_112	YRQYGAYREQPLPAQDPVSVKEEPEAEVRMVNGKPKKVRKP
O60566_250	LKSKGKKTARAPIIRVGGALKAPSQNRGLQNPFPQQMQNNS
O60885_1111	PKKQELRAASVVQPQPLVVVKEEKIHSPIIRSEPFSPSLRP
O60907_560	VHSYRGTGGIFEVCWNARGDKVGASASDGSVCVLDLRKXXX
O70126_207	EELSDALTYCHKKKVIHRDIKPENLLLGLQGELKIADFGWS
O70343_183	STQNHAANHTHRIRTNPAIVKTENSWSNKAKSICQQQKPQR
O74261_324	TLGDIAILSGGTVFTEELDIKPENATIEQLGSAGAVTITKE
O75030_289	GLPPPGLTISNSCPANLPNIKRELTACIFPTESEARALAKE
O75030_423	GLSLIPSTGLCSPDLVNRIIKQEPVLENCSQDLLQHHADLT
O75396_81	FHYIIEQGVCYLVLCEAAFPKKLAFAYLEDLHSEFDEQHGK
O75444_29	NSDLPTSPLAMEYVNDFDLMKFEVKKEPVETDRIISQCGRL
O75444_33	PTSPLAMEYVNDFDLMKFEVKKEPVETDRIISQCGRLIAGG
O75444_331	QQRHVLESEKNQLLQQVDHLKQEISRLVRERDAYKEKYEKL
O75475_250	QPKKDEEGQKEEDKPRKEPDKKEGKKEVESKRKNLAKTGVT
O75475_254	DEEGQKEEDKPRKEPDKKEGKKEVESKRKNLAKTGVTSTSD
O75475_364	RETSMDSRLQRIHAEIKNSLKIDNLDVNRCIEALDELASLQ
O75475_75	PKDIFPYSENKEKYGKPNKRKGFNEGLWEIDNNPKVKFSSQ
O75533_413	DERNRPLSDEELDAMFPEGYKVLPPPAGYVPIRTPARKLTA
O75626_816	DLPLMKLPPSNPLPLVPVKVKQETVEPMDPXXXXXXXXXXX
O75643_1071	SIEEPSAKINVLLQAFISQLKLEGFALMADMVYVTQSAGRL
O75643_1199	HLFPKLELSVHLQPITRSTLKVELTITPDFQWDEKVHGSSE
O75643_2091	AKSNSLISIKRLTLQQKAKVKLDFVAPATGAHNYTLYFMSD
O75643_944	YLYIRMLRSPTLYGISHDDLKGDPLLDQRRLDLVHTAALML
O75643_971	QRRLDLVHTAALMLDKNNLVKYDKKTGNFQVTELGRIASHY
O80982_167	SGMSCVEVGQYGFDGEVERLKRDHGVLVAEVVRLRQQQHSS
O80982_315	CLEAMNVMMRDGNLEAALDVKVEDLVGSPLDWDSQDLHDMV
O95365_61	EGREFPTHRSVLAACSQYFKKLFTSGAVVDQQNVYEIDFVS
O95600_67	TSPTLLDANPMENPALFNDIKIEPPEELLASDFSLPQVEPV
O95644_349	DGVPVKSRKTTLEQPPSVALKVEPVGEDLGSPPPPADFAPE
O95644_702	KRKRSQYQRFTYLPANVPIIKTEPTDDYEPAPTCGPVSQGL
O95644_914	LLPEVHEDGSPNLAPIPVTVKREPEELDQLYLDDVNEIIRN
O95785_1523	AGRAADGGERPLAASPPGTVKAEEHQRQNINKFERRQARPP
P00441_76	AGCTSAGPHFNPLSRKHGGPKDEERHVGDLGNVTADKDGVA
P00445_19	XXMVQAVAVLKGDAGVSGVVKFEQASESEPTTVSYEIAGNS
P01100_265	NDPEPKPSVEPVKSISSMELKTEPFDDFLFPASSRPSGSET
P02340_383	SSYLKTKKGQSTSRHKKTMVKKVGPDSDXXXXXXXXXXXXX
P02545_201	KQLQDEMLRRVDAENRLQTMKEELDFQKNIYSEELRETKRR
P02545_378	EYQELLDIKLALDMEIHAYRKLLEGEEERLRLSPSPTSQRS
P02545_420	GRASSHSSQTQGGGSVTKKRKLESTESRSSFSQHARTSGRV
P02545_486	NWQIKRQNGDDPLLTYRFPPKFTLKAGQVVTIWAAGAGATH
P03069_50	SASTSTAKPMVGQLIFDKFIKTEEDPIIKQDTPSNLDFDFA
P03069_58	PMVGQLIFDKFIKTEEDPIIKQDTPSNLDFDFALPQTATAP
P03372_266	YEVGMMKGGIRKDRRGGRMLKHKRQRDDGEGRGEVGSAGDM
P03372_268	VGMMKGGIRKDRRGGRMLKHKRQRDDGEGRGEVGSAGDMRA
P03871_305	RMANLKIRRTKFKSVLYHILKELIQSQGTVKVYRGSSFSHD
P04050_1487	DGGVTPYSNESGLVNADLDVKDELMFSPLVDSGSNDAMAGG
P04150_277	IKDNGDLVLSSPSNVTLPQVKTEKEDFIELCTPGVIKQEKL
P04150_293	LPQVKTEKEDFIELCTPGVIKQEKLGTVYCQASFPGANIIG
P04150_703	QELFDEIRMTYIKELGKAIVKREGNSSQNWQRFYQLTKLLD
P04456_61	ARAPKYASKAVPHYNRLDSYKVIEQPITSETAMKKVEDGNI
P04786_65	EPYDSDEAISKISKKKTKKIKTEPVQSSSLPSPPAKKSATS
P04786_91	SSSLPSPPAKKSATSKPKKIKKEDGDVKVKTTKKEEQENEK
P05067-4_587	ARPAADRGLTTRPGSGLTNIKTEEISEVKMDAEFRHDSGYE
P05067-4_595	LTTRPGSGLTNIKTEEISEVKMDAEFRHDSGYEVHHQKLVF
P05455_41	IEYYFGDFNLPRDKFLKEQIKLDEGWVPLEIMIKFNRLNRL
P05549_10	XXXXXXXXXXXMLWKLTDNIKYEDCEDRHDGTSNGTARLPQ
P05627_229	QPPHHLPQQIPVQHPRLQALKEEPQTVPEMPGETPPLSPID
P05627_257	EMPGETPPLSPIDMESQERIKAERKRMRNRIAASKCRKRKL
P05750_212	PAKSRTGPKALPDAVTIIEPKEEEPILAPSVKDYRPAEETE
P05783_207	KVIDDTNITRLQLETEIEALKEELLFMKKNHEEEVKGLQAQ
P05783_372	TRAEGQRQAQEYEALLNIKVKLEAEIATYRRLLEDGEDFNL
P05787_285	AQYEDIANRSRAEAESMYQIKYEELQSLAGKHGDDLRRTKT
P05787_364	LAIKDANAKLSELEAALQRAKQDMARQLREYQELMNVKLAL
P06400_720	LDQIMMCSMYGICKVKNIDLKFKIIVTAYKDLPHAVQETFK
P06401_388	EPKDDAYPLYSDFQPPALKIKEEEEGAEASARSPRSYLVAG
P06401_531	LYPALGLNGLPQLGYQAAVLKEGLPQVYPPYLNYLRPDSEA
P06730_162	FDDYSDDVCGAVVNVRAKGDKIAIWTTECENREAVTHIGRV
P06730_206	RLGLPPKIVIGYQSHADTATKSGSTTKNRFVVXXXXXXXXX
P06730_212	KIVIGYQSHADTATKSGSTTKNRFVVXXXXXXXXXXXXXXX
P06730_36	TTEEEKTESNQEVANPEHYIKHPLQNRWALWFFKNDKSKTW
P06730_49	ANPEHYIKHPLQNRWALWFFKNDKSKTWQANLRLISKFDTV
P06748_230	NGKDSKPSSTPRSKGQESFKKQEKTPKTPKGPSSVEDIKAK
P06748_263	SVEDIKAKMQASIEKGGSLPKVEAKFINYVKNCFRMTDQEA
P06778_126	IGYGTVENERRKPAAFERAKKSAVTDALKRSLRGFGNALGN
P06778_200	SESSRTNTLHENQEQQQYPNKRRQLTKVTNTNPDSTKNLVK
P06778_220	KRRQLTKVTNTNPDSTKNLVKIENTVSRGTPMMAAPAEANS
P06786_1220	EDYDPSKKNKKSTARKGKKIKLEDKNFERILLEQKLVTKSK
P06786_1246	FERILLEQKLVTKSKAPTKIKKEKTPSVSETKTEEEENAPS
P06786_1277	KTEEEENAPSSTSSSSIFDIKKEDKDEGELSKISNKFKKIS
P07910_176	SKRQRVSGNTSRRGKSGFNSKSGQRGSSKSGKLKGDDLQAI
P07910_223	IKQKVDSLLENLEKIEKEQSKQAVEMKNDKSEEEQSSSSVK
P07910_229	SLLENLEKIEKEQSKQAVEMKNDKSEEEQSSSSVKKDETNV
P07910_232	ENLEKIEKEQSKQAVEMKNDKSEEEQSSSSVKKDETNVKME
P07910_243	KQAVEMKNDKSEEEQSSSSVKKDETNVKMESEGGADDSAEE
P07910_250	NDKSEEEQSSSSVKKDETNVKMESEGGADDSAEEGDLLDDD
P07910_50	KSDVEAIFSKYGKIVGCSVHKGFAFVQYVNERNARAAVAGE
P07910_89	GEDGRMIAGQVLDINLAAEPKVNRGKAGVKRSAAEMYGSVT
P08047_16	XXXXXMSDQDHSMDEMTAVVKIEKGVGGNNGGNGNGGGAFS
P08069_1055	VNEAASMRERIEFLNEASVMKEFNCHHVVRLLGVVSQGQPT
P08069_1130	SKMIQMAGEIADGMAYLNANKFVHRDLAARNCMVAEDFTVK
P08069_1150	KFVHRDLAARNCMVAEDFTVKIGDFGMTRDIYETDYYRKGG
P08151_180	ARGGMIPHPQSRGPFPTCQLKSELDMLVGKCREEPLEGDMS
P08151_815	ALGGTYSQCPRLEHYGQVQVKPEQGCPVGSDSTGLAPCLNA
P08235_399	EVESAISNGVTGQLNIVQYIKPEPDGAFSSSCLGGNSKINS
P08235_428	SSCLGGNSKINSDSSFSVPIKQESTKHSCSGTSFKGNPTVN
P08235_494	GPPVPGFDGNCEGSGFPVGIKQEPDDGSYYPEASIPSSAIV
P08235_89	ELLPCLQQDNNRPGILTSDIKTELESKELSATVAESMGLYM
P08235_953	DLVSDLLEFCFYTFRESHALKVEFPAMLVEIISDQLPKVES
P08758_29	VTDFPGFDERADAETLRKAMKGLGTDEESILTLLTSRSNAQ
P09450_237	PPFAGGHPAQLGLSRGASAFKEEPQTVPEARSRDATPPVSP
P09450_301	KCRKRKLERIARLEDKVKTLKAENAGLSSAAGLLREQVAQL
P09874_203	GFSLLATEDKEALKKQLPGVKSEGKRKGDEVDGVDEVAKKK
P09874_486	TKSLQELFLAHILSPWGAEVKAEPVEVVAPRGKSGAALSKK
P10071_1422	LALQSGQLSDTSQTCRVNGIKMEMKGQPHPLCSNLQNYSGQ
P10071_462	DLPSPGARGQQEQPEGTTLVKEEGDKDESKQEPEVIYETNC
P10071_696	QQDLSNTTSKREECLQVKTVKAEKPMTSQPSPGGQSSCSSQ
P10071_779	TALALQARRNPAGTKWMEHVKLERLKQVNGMFPRLNPILPP
P10071_87	GLSKVSEEPSTSSDERASLIKKEIHGSLPHVAEPSVPYRGT
P10242_503	PLKMLPQTPSHLVEDLQDVIKQESDESGIVAEFQENGPPLL
P10242_527	DESGIVAEFQENGPPLLKKIKQEVESPTDKSGNFFCSHHWE
P10275_388	PLALAGPPPPPPPPHPHARIKLENPLDYGSAWAAAAAQCRY
P10275_521	DVWYPGGMVSRVPYPSPTCVKSEMGPWMDSYSGPYGDMRLE
P10276_166	QKCFEVGMSKESVRNDRNKKKKEVPKPECSESYTLTPEVGE
P10276_171	VGMSKESVRNDRNKKKKEVPKPECSESYTLTPEVGELIEKV
P10276_399	MKITDLRSISAKGAERVITLKMEIPGSMPPLIQEMLENSEG
P10636_657	SKCGSLGNIHHKPGGGQVEVKSEKLDFKDRVQSKIGSLDNI
P10914_275	GYLLNEPGVQPTSVYGDFSCKEEPEIDSPGGDIGLSLQRVF
P10914_299	EIDSPGGDIGLSLQRVFTDLKNMDATWLDSLLTPVRLPSIQ
P10989_284	PSALGLENAGIHEATYNSIMKCDVDIRKDLYGNVVMSGGTT
P10989_68	GQKDSYVGDEAQSKRGILTLKYPIEHGIVNNWDDMEKIWHH
P11387_103	DRDKEKRKEEKVRASGDAKIKKEKENGFSSPPQIKDEPEDD
P11387_117	SGDAKIKKEKENGFSSPPQIKDEPEDDGYFVPPKEDIKPLK
P11387_153	IKPLKRPRDEDDADYKPKKIKTEDTKKEKKRKLEEEEDGKL
P11387_328	YFKAQTEARKQMSKEEKLKIKEENEKLLKEYGFCIMDNHKE
P11387_436	WTENIQGSIKYIMLNPSSRIKGEKDWQKYETARRLKKCVDK
P11388_1228	AEVLPSPRGQRVIPRITIEMKAEAEKKNKKKIKNENTEGSP
P11388_1240	IPRITIEMKAEAEKKNKKKIKNENTEGSPQEDGVELEGLKQ
P11474_403	LTLPLLRQTAGKVLAHFYGVKLEGKVPMHKLFLEMLEAMMD
P11627_1147	IAFVSAIILLLLILLILCFIKRSKGGKYSVKDKEDTQVDSE
P11627_1172	GKYSVKDKEDTQVDSEARPMKDETFGEYRSLESDNEEKAFG
P11831_147	VSGAVSGAKPGKKTRGRVKIKMEFIDNKLRRYTTFSKRKTG
P11978_1128	ADAKIMPKDILQITKKPLMVKNVKPSSPPDVKSLVQLSTME
P12004_164	FARICRDLSHIGDAVVISCAKDGVKFSASGELGNGNIKLSQ
P12004_254	PLVVEYKIADMGHLKYYLAPKIEDEEGSXXXXXXXXXXXXX
P12757_383	NQSKTDAPSGMELQSWYPVIKQEGDHVSQTHSFLHPSYYLY
P12757_50	KKMITDIHANGKTINKVPTVKKEHLDDYGEAPVETDGEHVK
P12954_1081	KTKKIKPKTRNRKSKRGDKVKVEEVIDLKSEFEEDDSRNTT
P12954_1089	TRNRKSKRGDKVKVEEVIDLKSEFEEDDSRNTTAAELLHNP
P12954_1142	NAKFLADAAMKKTQKFSKKVKNEPASSQMDIFSQLSRAKKK
P12956_556	PEGKVTKRKHDNEGSGSKRPKVEYSEEELKTHISKGTLGKF
P13647_178	DPSIQRVRTEEREQIKTLNNKFASFIDKVRFLEQQNKVLDT
P13693_164	GMVALLDYREDGVTPYMIFFKDGLEMEKCXXXXXXXXXXXX
P14316_137	RPSKKGKKPKTEKEDKVKHIKQEPVESSLGLSNGVSDLSPE
P14316_166	GLSNGVSDLSPEYAVLTSTIKNEVDSTVNIIVVGQSHLDSN
P14316_293	LLPGMASFVTSNKPDLQVTIKEESNPVPYNSSWPPFQDLPL
P15330-2_382	HQDGRQTNMNCWNTQNIPPIKTEPRDTSPQPFGLSYRAPPE
P15387_474	FARSIEMMDIVVEKNGESIAKKDKVQDNHLSPNKWKWTKRA
P15408_222	PAPGLQPMRSGGGSVGAVVVKQEPLEEDSPSSSSAGLDKAQ
P15806_496	PPDSYSGLGRAGTTAGASEIKREEKEDEEIASVADAEEDKK
P15873_127	KKDRIAEYSLKLMDIDADFLKIEELQYDSTLSLPSSEFSKI
P15976_137	PPQAVEDLDGKGSTSFLETLKTERLSPDLLTLGPALPSSLP
P16220_271	GVVMASSPALPTQPAEEAARKREVRLMKNREAARECRRKKK
P16220_290	RKREVRLMKNREAARECRRKKKEYVKCLENRVAVLENQNKT
P16371-2_167	PFGALGATMGLPHGPQGLLNKPPEHHRPDIKPTGLEGPAAA
P16371-2_177	LPHGPQGLLNKPPEHHRPDIKPTGLEGPAAAEERLRNSVSP
P16371-2_272	GEHVSMEVRDRESLNGERLEKPSSSGIKQERPPSRSGSSSS
P16371-2_279	VRDRESLNGERLEKPSSSGIKQERPPSRSGSSSSRSTPSLK
P16649_270	DTGSATTATTTTATETEIKPKEEDATPASLHQDHYLVPYNQ
P17302_144	DMHLKQIEIKKFKYGIEEHGKVKMRGGLLRTYIISILFKSI
P17302_237	SLVSLALNIIELFYVFFKGVKDRVKGKSDPYHATSGALSPA
P17544_107	KKAAAGPLDMSLPSTPDIKIKEEEPVEVDSSPPDSPASSPC
P17655_390	TAGGCRNYPNTFWMNPQYLIKLEEEDEDEEDGESGCTFLVG
P17676_174	PGCFAPLHPPPPPPPPPAELKAEPGFEPADCKRKEEAGAPG
P17844_53	KFGNPGEKLVKKKWNLDELPKFEKNFYQEHPDLARRTAQEV
P18031_335	RILEPHNGKCREFFPNHQWVKEETQEDKDCPIKEEKGSPLN
P18031_347	FFPNHQWVKEETQEDKDCPIKEEKGSPLNAAPYGIESMSQD
P18412_54	SQSALDDMFPEAVVSTAACVKNEAEDNINLIDTHPQFELVN
P18846_215	VMTSPVTLTSQTTKTDDPQLKREIRLMKNREAARECRRKKK
P19419_230	AEEAGLPLQVILTPPEAPNLKSEELNVEPGLGRALPPEVKV
P19419_249	LKSEELNVEPGLGRALPPEVKVEGPKEELEVAGERGFVPET
P19419_254	LNVEPGLGRALPPEVKVEGPKEELEVAGERGFVPETTKAEP
P19544_177	TPSYGHTPSHHAAQFPNHSFKHEDPMGQQGSLGEQQYSVPP
P19793_108	STGSPQLSSPMNPVSSSEDIKPPLGLNGVLKVPAHPSGNMA
P20153_20	XMDNCDQDASFRLSHIKEEVKPDISQLNDSNNSSFSPKAES
P20193_839	PDANDENHCHCRVCDSRLPIKVFYLRQHDASRKHVENKERQ
P20263_118	VESNSEGTSSEPCADRPNAVKLEKVEPTPEESQDMKALQKE
P20941_33	FEGQATHTGPKGVINDWRKFKLESQDSDSIPPSKKEILRQM
P21333_299	LNPKKARAYGPGIEPTGNMVKKRAEFTVETRSAGQGEVLVY
P21538_807	KSINEISKELVDYFSSNISMKTENXXXXXXXXXXXXXXXXX
P22336_133	VNQTSTFLDNYFSEHPNETLKDEDITDSGNVANQTNASNAG
P22336_170	SNAGVPDMLHSNSNLNANERKFANENPNSQKTRPIFAIEQL
P22336_427	AYALKGWYDSKGRNANFITLKQEPGMGGQSAASLTKFIAQR
P22460_221	RFYQLGDEAMERFREDEGFIKEEEKPLPRNEFQRQVWLIFE
P22460_536	VSNFNYFYHRETDHEEPAVLKEEQGTQSQGPGLDRGVQRKV
P23204_358	FITREFLKNLRKPFCDIMEPKFDFAMKFNALELDDSDISLF
P23396_18	XXXMAVQISKKRKFVADGIFKAELNEFLTRELAEDGYSGVE
P23396_214	PTGKIGPKKPLPDHVSIVEPKDEILPTTPISEQKGGKPEPP
P23396_230	IVEPKDEILPTTPISEQKGGKPEPPAMPQPVPTAXXXXXXX
P23497_297	AELHNHGIQINSCSVRLVDIKKEKPFSNSKVECQAQARTHH
P23611_310	LCQGRVFCSGNAVVCKGRPNKLERDEVVQVFDTNQFIRELQ
P23759_85	HGIRPCVISRQLRVSHGCVSKILCRYQETGSIRPGAIGGSK
P23769_222	AARGEDKDGVKYQVSLTESMKMESGSPLRPGLATMGTQPAT
P23769_389	VCNACGLYYKLHNVNRPLTMKKEGIQTRNRKMSNKSKKSKK
P24385_33	IRRAYPDANLLNDRVLRAMLKAEETCAPSVSYFKCVQKEVL
P25490_288	IDLSDPKQLAEFARMKPRKIKEDDAPRTIACPHKGCTKMFR
P25963_21	MFQAAERPQEWAMEGPRDGLKKERLLDDRHDSGLDSMKDEE
P26447_22	ACPLEKALDVMVSTFHKYSGKEGDKFKLNKSELKELLTREL
P26447_96	CVFLSCIAMMCNEFFEGFPDKQPRKKXXXXXXXXXXXXXXX
P26754_199	GMMKQPLESASNNNGQSLFVKDDNDTSSGSSPLQRILEFCK
P26755_46	QIKSQPTESQLILQSPTISSKNGSEVEMITLNNIRVSMNKT
P27540_245	LSTSENALTGRILDLKTGTVKKEGQQSSMRMCMGSRRSFIC
P27577_15	XXXXXXMKAAVDLKPTLTIIKTEKVDLELFPSPDMECADVP
P27577_227	SVILQDPLQTDTLQTDYFAIKQEVLTPDNMCLGRASRGKLG
P27694_449	DLKSGGVGGSNTNWKTLYEVKSENLGQGDKPDYFSSVATVV
P27694_577	AFEEVFQNANFRSFIFRVRVKVETYNDESRIKATVMDVKPV
P27782_25	SGGGGGGDPELCATDEMIPFKDEGDPQKEKIFAEISHPEEE
P27782_267	GPPGPHTTGIPHPAIVTPQVKQEHPHTDSDLMHVKPQHEQR
P27815_358	LKKLMHSNSLNNSNIPRFGVKTDQEELLAQELENLNKWGLN
P27816_838	STGPSSRSPSTLLPKKPTAIKTEGKPAEVKKMTAKSVPADL
P27824_525	GKKQTSGMEYKKTDAPQPDVKEEEEEKEEEKDKGDEEEEGE
P28324_167	YSSFTLNSLNSSNVKLFKLIKTENPAEKLAEKKSPQEPTPS
P28360_133	RPLGHFSVGGLLKLPEDALVKAESPEKPERTPWMQSPRFSP
P28360_15	XXXXXXMAPAADMTSLPLGVKVEDSAFGKPAGGGAGQAPSA
P29373_102	CKSLVKWESENKMVCEQKLLKGEGPKTSWTRELTNDGELIL
P29374_418	EYCRSANIQFRTVHHHEPKVKEEKKDLEESMEEALKLDQEM
P29374_444	LEESMEEALKLDQEMPLTEVKSEPEENIDSNSESEREEIEL
P29590_160	CFECEQLLCAKCFEAHQWFLKHEARPLAELRNQSVREFLDG
P29590_490	NTTTAQKRKCSQTQCPRKVIKMESEEGKEARLARSSPEQPR
P29590_497	RKCSQTQCPRKVIKMESEEGKEARLARSSPEQPRPSTSKAV
P29590_65	APASEEEFQFLRCQQCQAEAKCPKLLPCLHTLCSGCLEASG
P31596_570	KVTLAANGKSADCSVEEEPWKREKXXXXXXXXXXXXXXXXX
P31749_276	EIVSALDYLHSEKNVVYRDLKLENLMLDKDGHIKITDFGLC
P32333_101	NESDLVGGTNEGSPLDNAQVKLEHEMKIKLEEATQNNQLNL
P32333_109	TNEGSPLDNAQVKLEHEMKIKLEEATQNNQLNLLQEDHHLS
P32457_287	LDLKFMQSVYEKCNLIPVIAKSDILTDEEILSFKKTIMNQL
P32457_30	IKQDPEQEERQHDQFNDVQIKQESQDHDGVDSQYTNGTQND
P32457_443	EFDPISKQQEEKTLHEAKLAKLEIEMKTVFQQKVSEKEKKL
P32457_465	EIEMKTVFQQKVSEKEKKLQKSETELFARHKEMKEKLTKQL
P32457_63	YTNGTQNDDSERFEAAESDVKVEPGLGMGITSSQSEKGQVL
P32458_412	LQREKELREIEARLEKEAKIKQEEXXXXXXXXXXXXXXXXX
P32468_358	HNPRYKEEENALKKYFTDQVKAEEQRFRQWEQNIVNERIRL
P32504_556	ERPSQLTFASSHNPDTHPTQKQESEGPLQMSQLDTTQLNEL
P32504_651	RIKKSKIDDADKFIRDNQPIKKEENIVNEDGPNTSRRTKRP
P32504_779	KVTRIIEQKLGSHTGKFSTLKRPQLYMTEEHNVGFDMEVPK
P32526_301	KKYELIMKDYRFMNSEFRELKVELIDKRWNILFINLNHELL
P32526_333	FINLNHELLYILDEIERLQSKLLTTKYTKDITIRLERQLER
P32526_381	TFNIIYRALEFSLLDAGVASKTNELAQRWLNIKPTADKILI
P32526_529	PLPYDETDETTLRVSRGENEKSPDSFITSRHENKVQITETP
P32797_909	AINATVNPLRLLAAQNGVTVKKEEDNDDDAGAVPTSXXXXX
P32944_594	HIVHLDLKPANVMITFEGNLKLGDFGMATHLPLEDKSFENE
P33244-2_418	DIKPTPISPGYQQAYPNMNIKQEIQIPQVSSLTQSPDSSPS
P34896_38	HDKMLAQPLKDSDVEVYNIIKKESNRQRVGLELIASENFAS
P35187_621	TERKLTGDNEHPPPSWSPKIKREKSSVSQKDEEDDFDDDFS
P35187_831	HCVSNWGHDFRPDYKELKFFKREYPDIPMIALTATASEQVR
P35226_88	NIRSDKTLQDIVYKLVPGLFKNEMKRRRDFYAAHPSADAAN
P35398_240	SFYLDIQPSPDQSGLDINGIKPEPICDYTPASGFFPYCSFT
P35520_211	TPTNARFDSPESHVGVAWRLKNEIPNSHILDQYRNASNPLA
P35712_404	KMPSTPQPPNTAGTVSPTGIKNEKRGTSPVTQVKDEAAAQP
P35712_417	TVSPTGIKNEKRGTSPVTQVKDEAAAQPLNLSSRPKTAEPV
P35869_510	MNECRNWQDNTAPMGNDTILKHEQIDQPQDVNSFAGGHPGL
P35869_63	LNTELDRLASLLPFPQDVINKLDKLSVLRLSVSYLRAKSFF
P36049_36	EIEKAEKLENDLKKKKSQELKKEEPTIVTASNLKKLEKKEK
P36049_61	TIVTASNLKKLEKKEKKADVKKEVAADTEEYQSQALSKKEK
P36508_411	SAAEESPPPKRPRIAYLSEVKEERDDIPAQVAMVTEEDGAP
P36956_123	APTPLKMYPSMPAFSPGPGIKEESVPLSILQTPTPQPLPGA
P36956_418	KDLVSACGSGGNTDVLMEGVKTEVEDTLTPPPSDAGSPFQS
P37231_107	DPVVADYKYDLKLQEYQSAIKVEPASPPYYSEKTQLYNKPH
P37231_63	FGISSVDLSVMEDHSHSFDIKPFTTVDFSSISTPHYEDIPF
P37840_102	VEGAGSIAAATGFVKKDQLGKNEEGAPQEGILEDMPVDPDN
P37840_96	AVAQKTVEGAGSIAAATGFVKKDQLGKNEEGAPQEGILEDM
P38398_109	IICAFQLDTGLEYANSYNFAKKENNSPEHLKDEVSIIQSMG
P38398_119	LEYANSYNFAKKENNSPEHLKDEVSIIQSMGYRNRAKRLLQ
P38438_277	EVYKAKLKQNTSEQFETVAVKIFPYEEYSSWKTEKDIFSDI
P38904_1154	PLNEAKPKIPIIFPLKRPQIKPEVSVINLVQNLVNTKIPEI
P38904_981	DPHSNSTIAGHTLKGVTTPIKIEDSDANVPPVSIAVSTIEP
P39748_168	MGIPYLDAPSEAEASCAALVKAGKVYAAATEDMDCLTFGSP
P40075_180	AVVNEKEVPAEPETQPPVQVKKEEVPPVVQKTVPHENEKQT
P40337_171	ITLPVYTLKERCLQVVRSLVKPENYRRLDIVRSLYEDLEDH
P40460_231	GGSNWHKFLGMLHWMVRTNIKLDMCLNKVDRSLINQNTQEI
P41161_263	YHRQMSEPIVPAAPPPPQGFKQEYHDPLYEHGVPGMPGPPA
P41161_293	HGVPGMPGPPAHGFQSPMGIKQEPRDYCVDSEVPNCQSSYM
P41161_350	DPRLYFDDTCVVPERLEGKVKQEPTMYREGPPYQRRGSLQL
P41161_89	FVPDFQSDNLVLHAPPPTKIKRELHSPSSELSSCSHEQALG
P41212_99	LRPIDSNTFEMNGKALLLLTKEDFRYRSPHSGDVLYELLQH
P41235_365	QSITWQMIEQIQFIKLFGMAKIDNLLQEMLLGGSPSDAPHA
P41970_162	LYSSFTINSLQNPPDAFKAIKTEKLEEPPEDSPPVEEVRTV
P42224_703	RPKEAPEPMELDGPKGTGYIKTELISVSEVHPSRLQTTDNL
P42229_696	DEVFSKYYTPVLAKAVDGYVKPQIKQVVPEFVNASADAGGS
P42229_700	SKYYTPVLAKAVDGYVKPQIKQVVPEFVNASADAGGSSATY
P42260_886	RMSLKCQRRLKHKPQAPVIVKTEEVINMHTFNDRRLPGKET
P42575_77	LEHLLEKDIITLEMRELIQAKVGSFSQNVELLNLLPKRGPQ
P43268_260	PAVDQGGVNGHRYPGAGVVIKQEQTDFAYDSDVTGCASMYL
P43268_96	QFVPDFHSENLAFHSPTTRIKKEPQSPRTDPALSCSRKPPL
P43351_411	YSADQRTTGNWESHRKSQDMKKRKYDPSXXXXXXXXXXXXX
P43351_414	DQRTTGNWESHRKSQDMKKRKYDPSXXXXXXXXXXXXXXXX
P43354_577	GKLPELRTLCTQGLQRIFYLKLEDLVPPPAIIDKLFLDTLP
P43354_91	YDVKPPCLYQMPLSGQQSSIKVEDIQMHNYQQHSHLPPQSE
P43694_365	GASSNSSNATTSSSEEMRPIKTEPGLSSHYGHSSSVSQTFS
P45973_104	KSESNKRKSNFSNSADDIKSKKKREQSNDIARGFERGLEPE
P45973_106	ESNKRKSNFSNSADDIKSKKKREQSNDIARGFERGLEPEKI
P45973_32	SSSEDEEEYVVEKVLDRRVVKGQVEYLLKWKGFSEEHNTWE
P45973_69	NTWEPEKNLDCPELISEFMKKYKKMKEGENNKPREKSESNK
P45973_71	WEPEKNLDCPELISEFMKKYKKMKEGENNKPREKSESNKRK
P45973_84	SEFMKKYKKMKEGENNKPREKSESNKRKSNFSNSADDIKSK
P46060_524	SSSFNSNTFLTRLLVHMGLLKSEDKVKAIANLYGPLMALNH
P46099_56	TQDLGPGPPNPTGPSLHVSLKSEDPSGEDDERDVTCAWDPD
P47743_882	AATMQSKLIQKGNDRPNGEVKSELCESLETNTSSTKTTYIS
P48432_247	MSYSQQGTPGMALGSMGSVVKSEASSSPPVVTSSSHSRAPC
P48437_232	KLPQQQQQSFQQLVSARKEQKREERRQLKQQLEDMQKQLRQ
P48437_326	QFIDRARALIREQEMAENKPKREGSNKERDHGPNSLQPEGK
P48437_353	ERDHGPNSLQPEGKHLAETLKQELNTAMSQVVDTVVKVFSA
P48437_556	HPCSPAHPPSTAEGLSLSLIKSECGDLQDMSDISPYSGSAM
P48552_1154	SRPHSANGEVYGLLGSVLTIKKESEXXXXXXXXXXXXXXXX
P48552_170	SQQIRQSLKEQGYALSHDSLKVEKDLRCYGVASSHLKTLLK
P48552_756	ESTQEHSERALSEQILMVKIKSEPCDDLQIPNTNVHLSHDA
P49138_339	QTPLHTSRVLKEDKERWEDVKEEMTSALATMRVDYEQIKIK
P49711_689	AIIQVEDQNTGAIENIIVEVKKEPDAEPAEGEEEEAQPAAT
P49711_74	VNSSVQMVMMEQLDPTLLQMKTEVMEGTVAPEAEAAVDDTQ
P49715_161	GRLEPLYERVGAPALRPLVIKQEPREEDEAKQLALAGLFPY
P49716_120	LLPGGPARPLGPGPAAPRLLKREPDWGDGDAPGSLLPAQVA
P49750_1053	DKGLVNRGRGQAISRGPGLVKQEDFRDKMMGRREDSREKMN
P49750_1596	EDSFYGLWDTNDEQGLNSEFKSETAAIPSAPVLPPPPVHSS
P49750_983	GGMEGGTAVATSSLTADNDFKPVGIGLPHSENNQDKGLPRP
P49756_578	PDAELQRMEQEAERRRQPQIKQEPESEEEEEEKQEKEEKRE
P49790_353	SSPLNSPLDRSGIDITDFQAKREKVDSQYPPVQRLMTPKPV
P49841_292	VLGTPTREQIREMNPNYTEFKFPQIKAHPWTKVFRPRTPPE
P50552_286	EMNAMLARRRKATQVGEKTPKDESANQEEPEARVPAQSESV
P50623_153	AWRSFSRNKAEYDKKVLLQAKQYSKXXXXXXXXXXXXXXXX
P50623_157	FSRNKAEYDKKVLLQAKQYSKXXXXXXXXXXXXXXXXXXXX
P51858_96	PNKRKGFSEGLWEIENNPTVKASGYQSSQKKSCVEEPEPEP
P52272_17	XXXXMAAGVEAAAEVAATEIKMEEESGAPGVPSGNGAPGPK
P52272_698	HVLYADIKMENGKSKGCGVVKFESPEVAERACRMMNGMKLS
P52565_138	VNREIVSGMKYIQHTYRKGVKIDKTDYMVGSYGPRAEEYEF
P52739-2_567	QADAAEAAREDHEDAEDLETKPTVDSEAEKAENEDRTALPV
P52926_66	KRPRGRPKGSKNKSPSKAAQKKAEATGEKRPRGRPRKWPQQ
P52952_52	ELSARLEATLAPSSCMLAAFKPEAYAGPEAAAPGLPELRAE
P53067_909	SELSFQSKQPNPEQLITSDIKQEVVNANKDDDNDDWEDVDD
P54132_317	DTDFVPPSPEEIISASSSSSKCLSTLKDLDTSDRKEDVLST
P54132_331	ASSSSSKCLSTLKDLDTSDRKEDVLSTSKDLLSKPEKMSMQ
P54132_344	DLDTSDRKEDVLSTSKDLLSKPEKMSMQELNPETSTDCDAR
P54132_347	TSDRKEDVLSTSKDLLSKPEKMSMQELNPETSTDCDARQIS
P54253_16	XXXXXMKSNQERSNECLPPKKREIPATSRSSEEKAPTLPSD
P54253_194	LEAYSTLLANMGSLSQTPGHKAEQQQQQQQQQQQQHQHQQQ
P54253_609	KVEDLKTEDFIQSAEISNDLKIDSSTVERIEDSHSPGVAVI
P54253_745	EQENGINQGSAQMLSENGELKFPEKMGLPAAPFLTKIEPSK
P54274_337	SHKNLFLSKLQHGTQQQDLNKKERRVGTPQSTKKKKESRRA
P54274_338	HKNLFLSKLQHGTQQQDLNKKERRVGTPQSTKKKKESRRAT
P54274_349	GTQQQDLNKKERRVGTPQSTKKKKESRRATESRIPVSKSQP
P54274_350	TQQQDLNKKERRVGTPQSTKKKKESRRATESRIPVSKSQPV
P54274_351	QQQDLNKKERRVGTPQSTKKKKESRRATESRIPVSKSQPVT
P54274_352	QQDLNKKERRVGTPQSTKKKKESRRATESRIPVSKSQPVTP
P55055_31	TPLPGNGPPQPGAPSSSPTVKEEGPEPWPGGPDPDVPGTDE
P55055_409	GRVEALQQPYVEALLSYTRIKRPQDQLRFPRMLMKLVSLRT
P55055_447	LRTLSSVHSEQVFALRLQDKKLPPLLSEIWDVHEXXXXXXX
P55265_418	NASNNMVTTEKVENGQEPVIKLENRQEARPEPARLKPPVHY
P55852_23	ANQEEDKKPGDGGAHINLKVKGQDGNEVFFRIKRSTQLKKL
P55852_42	VKGQDGNEVFFRIKRSTQLKKLMNAYCDRQSVDMNSIAFLF
P56524_559	PYLDRLPGQKEAHAQAGVQVKQEPIESDEEEAEPPREVEPG
P56539_38	HCKEIDLVNRDPKNINEDIVKVDFEDVIAEPVGTYSFDGVW
P56817_275	RREWYYEVIIVRVEINGQDLKMDCKEYNYDKSIVDSGTTNL
P57682_198	SSMQVPVIESYEKPISQKKIKIEPGIEPQRTDYYPEEMSPP
P58012_114	NKKGWQNSIRHNLSLNECFIKVPREGGGERKGNYWTLDPAC
P58012_150	LDPACEDMFEKGNYRRRRRMKRPFRPPPAHFQPGKGLFGAG
P58012_25	YPEPEDAAGALLAPETGRTVKEPEGPPPSPGKGGGGGGGTA
P60484_254	REDKFMYFEFPQPLPVCGDIKVEFFHKQNKMLKKDKMFHFW
P60484_266	PLPVCGDIKVEFFHKQNKMLKKDKMFHFWVNTFFIPGPEET
P60484_289	KMFHFWVNTFFIPGPEETSEKVENGSLCDQEIDSICSIERA
P60709_113	ELRVAPEEHPVLLTEAPLNPKANREKMTQIMFETFNTPAMY
P61086_14	XXXXXXXMANIAVQRIKREFKEVLKSEETSKNQIKVDLVDE
P61289_14	XXXXXXXMASLLKVDQEVKLKVDSFRERITSEAEDLVANFF
P62508_40	LLCRMSNKDRHIDSSCSSFIKTEPSSPASLTDSVNHHSPGG
P63000_183	RGLKTVFDEAIRAVLCPPPVKKRKRKCLLLXXXXXXXXXXX
P63000_184	GLKTVFDEAIRAVLCPPPVKKRKRKCLLLXXXXXXXXXXXX
P63000_186	KTVFDEAIRAVLCPPPVKKRKRKCLLLXXXXXXXXXXXXXX
P63000_188	VFDEAIRAVLCPPPVKKRKRKCLLLXXXXXXXXXXXXXXXX
P63015_91	IGGSKPRVATPEVVSKIAQYKRECPSIFAWEIRDRLLSEGV
P63165_25	EAKPSTEDLGDKKEGEYIKLKVIGQDSSEIHFKVKMTTHLK
P68431_24	TKQTARKSTGGKAPRKQLATKAARKSAPATGGVKKPHRYRP
P70434_406	LGFGQDLSAGRPKEKTLILVKLEPWVCKAYLEGVQREGVSS
P70671_152	LPHSQENLPKLFDGLILGPLKDEGSSDLAIVSDPSQQLPSP
P78347_221	VTDADRSILSPGGSCGPIKVKTEPTEDSGISLEMAAVTVKE
P78347_240	VKTEPTEDSGISLEMAAVTVKEESEDPDYYQYNIQAGPSET
P78347_456	HELLNSTREDLQLDKPASGVKEEWYARITKLRKMVDQLFCK
P78347_991	SQLEVPATEEIKETDGSSQIKQEPDPTWXXXXXXXXXXXXX
P82970_101	KNGEAKITEAPASEKEIVEVKEENIEDATEKGGEKKEAVAA
Q00288_309	NLSTHQTYPVVADPHSPFAIKQETPELSSSSSTPSSLSSSA
Q00613_298	ASPGGSIDERPLSSSPLVRVKEEPPSPPQSPRVEEASPGRP
Q00653_298	PTDVHKQYAIVFRTPPYHKMKIERPVTVFLQLKRKRGGDVS
Q00653_689	NTPLHLAAGLGYPTLTRLLLKAGADIHAENEEPLCPLPSPP
Q00653_863	GVRLLRGPETRDKLPSTAEVKEDSAYGSQSVEQEAEKLGPP
Q00653_90	SEKGRKTYPTVKICNYEGPAKIEVDLVTHSDPPRAHAHSLV
Q01543_67	KINPLPPQQEWINQPVRVNVKREYDHMNGSRESPVDCSVSK
Q01826_744	LLKDLEESVQDKNTNTLFSVKLEEELSVEGNTDINTDLKDX
Q02078_403	GGQLSQGSNLSINTNQNISIKSEPISPPRDRMTPSGFQQQQ
Q02080-2_319	LGEEGPPTRGASPPTPPVSIKSERLSPAPGGPGDFPKTFPY
Q02447_120	AQLGGAPNRWEVLSATPTTIKDEAGNLVQIPSAATSSGQYV
Q02447_551	SAGIQLHPGENADSPADIRIKEEEPDPEEWQLSGDSTLNTN
Q02591_183	HRTIFTDEQLEALENLFQETKYPDVGTREQLARKVHLREEK
Q02591_196	ENLFQETKYPDVGTREQLARKVHLREEKVEVWFKNRRAKWR
Q02591_203	KYPDVGTREQLARKVHLREEKVEVWFKNRRAKWRRQKRSSS
Q02591_209	TREQLARKVHLREEKVEVWFKNRRAKWRRQKRSSSEESENA
Q02591_214	ARKVHLREEKVEVWFKNRRAKWRRQKRSSSEESENAEKWNK
Q02591_238	QKRSSSEESENAEKWNKTSSKASPEKREEEGKSDLDSDSXX
Q02750_104	KVSHKPSGLVMARKLIHLEIKPAIRNQIIRELQVLHECNSP
Q03188_534	TSTVTKSRRISRRPSDWWVVKSEESPVYSNSSVRNELPMHH
Q03188_721	VDDEEVHGSSDDSKQSKVIPKNRIHHKLVLPSNTPNVRRTK
Q03188_746	HKLVLPSNTPNVRRTKRTRLKPLEYWRGERIDYQGRPSGGF
Q03330_25	HQIEEDHLDGATTDPEVKRVKLENNVEEIQPEQAETNKQEG
Q03933_139	NKIRQEDLTKIISSAQKVQIKQETIESRLSELKSENESLWK
Q03933_82	VRQLNMYGFRKVVHIDSGIVKQERDGPVEFQHPYFKQGQDD
Q04110_101	KPSESKKKENIVAYNDTPGIKTEHTAFQPLTPISKKRALKE
Q04322_498	IDSIMRILATLLSNSRDHLLKMGFDDMLELLKSGLLDAYIK
Q05024_201	TMFSMNKLLTKHLFNPDEIVKHEEEQKQTPEKEIKLENESL
Q05024_215	NPDEIVKHEEEQKQTPEKEIKLENESLPNLSGXXXXXXXXX
Q05193_376	LSGGARINRIFHERFPFELVKMEFDEKELRREISYAIKNIH
Q05397_152	GFLNQFTEDKPTLNFFYQQVKSDYMLEIADQVDQEIALKLG
Q05516_242	AGPEEPTLAGGGRHPGVAEVKTEMMQVDEVPSQDSPGAAES
Q05516_387	DFSTYGGLLPQGFIQRELFSKLGELAVGMKSESRTIGEQCS
Q05516_396	PQGFIQRELFSKLGELAVGMKSESRTIGEQCSVCGVELPDN
Q07657_426	HDSAENEQEMSPVRQLGREIKQENENLIRSIKTESSPKFLN
Q07657_437	PVRQLGREIKQENENLIRSIKTESSPKFLNSPDLPERTKLR
Q07666_102	APTPLLPPSATASVKMEPENKYLPELMAEKDSLDPSFTHAM
Q07666_96	ATVGGPAPTPLLPPSATASVKMEPENKYLPELMAEKDSLDP
Q07869_185	GMSHNAIRFGRMPRSEKAKLKAEILTCEHDIEDSETADLKS
Q07979_322	DSTTRGLIWLERIGYMDLYEKNEKKVKQEELLNTNEEGINR
Q07979_328	LIWLERIGYMDLYEKNEKKVKQEELLNTNEEGINRKQNDEN
Q08211_120	NAEGDLPTTMGGPLPPHLALKAENNSEVGASGYGVPGPTWD
Q08211_76	DAQSNAARDFVNYLVRINEIKSEEVPAFGVASPPPLTDTPD
Q09472_1020	SKVEDCKMESTETEERSTELKTEIKEEEDQPSTSATQSSPA
Q09472_1024	DCKMESTETEERSTELKTEIKEEEDQPSTSATQSSPAPGQS
Q0VGT2_630	SVEASSTSHTVEDCLHIKAIKTESSGLCQSSPGAQSSCSSE
Q0VGT2_716	STGGLQLRKHMSTVHRFEQLKREKLKSLKDSCSWAGPAPHT
Q12158_165	FLDDTTIPVGLMAQENSMERKVQGAAPWDTSLEVGRRFSPD
Q12158_290	LGESIMSEEPTDFGFDLDIEKEAPAGNIDTITDAMTESQPK
Q12158_460	VPIDAGLNEAPFPEENIIDAKTRNEQTTIQTEKVRPTPGEV
Q12216_438	KPIHNSSAVITDTVNQNHSVKNENQGTVKQEQDYDSRNAFD
Q12216_446	VITDTVNQNHSVKNENQGTVKQEQDYDSRNAFDTNLRNGSN
Q12223_207	YETKITNNYYVDGLYGSKKIKNEANTNYNLLSATNSKPTFI
Q12223_228	NEANTNYNLLSATNSKPTFIKLEDAKGTHIKXXXXXXXXXX
Q12692_126	IRATIASGGVLPHINKALLLKVEKKGSKKXXXXXXXXXXXX
Q12772_464	FSPYSIDSEPGSPLLDDAKVKDEPDSPPVALGMVDRSRILL
Q12948_227	EQADGNAPGPQPPPVRIQDIKTENGTCPSPPQPLSPAAALG
Q12948_256	PPQPLSPAAALGSGSAAAVPKIESPDSSSSSLSSGSSPPGS
Q13129_1599	AYLEQQMENLVVCVKYGTKIKEEPPSEADPCIKKEENRSCE
Q13129_839	QNHLSMHNVENSNGDIKKSVKLEESATGEKQDCINQPHLLN
Q13164_22	AEPLKEEDGEDGSAEPPGPVKAEPAHTAASVAAKNLALLKA
Q13263_554	PGTAPAGTPGAPPLAGMAIVKEEETEAAIGAPPTATEGPET
Q13263_575	EEETEAAIGAPPTATEGPETKPVLMALAEGPGAEGPRLASP
Q13263_676	LQDVPGEEWSCSLCHVLPDLKEEDGSLSLDGADSTGVVAKL
Q13263_750	SLDQPGGTLDLTLIRARLQEKLSPPYSSPQEFAQDVGRMFK
Q13263_779	QEFAQDVGRMFKQFNKLTEDKADVQSIIGLQRFFETRMNEA
Q13263_804	SIIGLQRFFETRMNEAFGDTKFSAVLVEPPPMSLPGAGLSS
Q13285_119	YKRDRALKQQKKAQIRANGFKLETGPPMGVPPPPPPAPDYV
Q13285_194	PGAHGPLAGYLYPAFPGRAIKSEYPEPYASPPQPGLPYGYP
Q13330_509	ILRPWHAARHPYLPINSAAIKAECTARLPEASQSPLVLKQA
Q13363_428	SHGLPPVAHPPHAPSPGQTVKPEADRDHASDQLXXXXXXXX
Q13422_241	ERCHNYLESMGLPGTLYPVIKEETNHSEMAEDLCKIGSERS
Q13422_58	STTSGGQQSSKSDRVVASNVKVETQSDEENGRACEMNGEEC
Q13426_210	KIRSLHNKLLNAAQEREKDIKQEGETAICSEMTADRDPVYD
Q13428_755	LGQGTAPVLPGKTGPTVTQVKAEKQEDSESSEEESDSEEAA
Q13485_113	VIYARLWRWPDLHKNELKHVKYCQYAFDLKCDSVCVNPYHY
Q13485_159	PGIDLSGLTLQSNAPSSMMVKDEYVHDFEGQPSLSTEGHSI
Q13506_480	SLGILKDYPHSAFTLEKKVIKTEPEDSRXXXXXXXXXXXXX
Q13547_444	EEEGEGGRKNSSNFKKAKRVKTEDEKEKDPEEKKEVTEEEK
Q13547_476	KKEVTEEEKTKEEKPEAKGVKEEVKLAXXXXXXXXXXXXXX
Q13569_330	EVQYTFDLQLAQEDAKKMAVKEEKYDPGYEAAYGGAYGENP
Q13887_162	DITHLRTGLYKSQRPCVTHIKTEPVAIFSHQSETTAPPPAP
Q13887_209	FTSIFSSHQTAAPEVNNIFIKQELPTPDLHLSVPTQQGHLY
Q14151_225	EESLLEPENEKILDILGETCKSEPVKEESSELEQPFAQDTS
Q14151_230	EPENEKILDILGETCKSEPVKEESSELEQPFAQDTSSVGPD
Q14151_293	ASESTAHAQSSKADSLLAVVKREPAEQPGDGERTDCEPVGL
Q14151_391	SSTSEGADQKMSSFKEEKDIKPIIKDEKGRVGSGSGRNLWV
Q14151_517	ECEVKKEKLSSVDRHHSVEIKIEKTVIKKEEKIEKKEEKKP
Q14151_524	KLSSVDRHHSVEIKIEKTVIKKEEKIEKKEEKKPEDIKKEE
Q14164_231	LYHAATGSLPFIPFGGPRRNKEIMYRITTEKPAGAIAGAQR
Q14191_496	LKSLENLNSGTVEPTHSKCLKMERNLGLPTKEEEEDDENEA
Q14526_333	SPGPEPPGRPDGPSLLYRWMKHEPGLGSYGDELGRERGSPS
Q14676_1840	SPPHQKQPQRGEVSQKTVIIKEEEEDTAEKPGKEEDVVTPK
Q14980_1766	PDGTSVPGEPASPISQRLPPKVESLESLYFTPIPARSQAPL
Q15022_72	YSASSSSSAAAAAGAAVLPVKKPKMEHVQADHELFLQAFEK
Q15022_75	SSSSSAAAAAGAAVLPVKKPKMEHVQADHELFLQAFEKPTQ
Q15054_258	FFGKAAMNKFKVNLDSEQAVKEEKIVEQPTVSVTEPKLATP
Q15054_444	VHRPPAMTVKKEPREERKGPKKGTAALGKANRQVSITGFFQ
Q15326_407	LKVTQEPRAKKGRRNQSVEPKKEEPEPETEAVSSSQEIPTM
Q15554_287	LESHLDDAEPYLLTMAKKALKSESAASSTGKEDKQPAPGPV
Q15596_239	EAHQKYETMQCFAVSQPKSIKEEGEDLQSCLICVARRVPMK
Q15596_731	TGKDLSQESSSTAPGSEVTIKQEPVSPKKKENALLRYLLDK
Q15596_788	RLDSKTDPASNTKLIAMKTEKEEMSFEPGDQPGSELDNLEE
Q15744_121	ALGPGIYSSPGSYDPRAVAVKEEPRGPEGSRAASRGSYNPL
Q15788_732	KDSASTSVSVTGQVQGNSSIKLELDASKKKESKDHQLLRYL
Q16204_266	RDISMEIDSPENMMRHIRFLKNEVERLKKQLRAAQLQHSEK
Q16204_424	GTSHGITRPSPRRSNSPDKFKRPTPPPSPNTQTPVQPPPPP
Q16204_74	FRLEELTNRLASLQQENKVLKIELETYKLKCKALQEENRDL
Q16514_19	XXMNQFGPSALINLSNFSSIKPEPASTPPQGSMANSTAVVK
Q16621_368	EEYALQQAADGTIFLVPRGTKMEATDXXXXXXXXXXXXXXX
Q16665_391	MTQLFTKVESEDTSSLFDKLKKEPDALTLLAPAAGDTIISL
Q16665_477	ETPKPLRSSADPALNQEVALKLEPNPESLELSFTMPQIQDQ
Q16666_561	PQMPPSTPSSSFLTTLKPRLKTEPEEVSIEDSAQSDLKEVM
Q16849_754	NIKKNRHPDFLPYDHARIKLKVESSPSRSDYINASPIIEHD
Q19691_231	FRETEFIAVTAYQNEKVTELKIENNPFAKGFRDAGAGKREK
Q19691_400	SECKVEATSEDSEEAEKPEVKKEQKSVTPPKKGGFDVLDLL
Q24151_187	PIHNVQNTGIASPALGMVTPKVELYEVQHQIMQSLNEFGNC
Q2QGD7_660	PTSSSTPRENASVPELLAPIKVEPDSPSRPGAVGQQEGSHG
Q2TB10_409	TNSKREKGPNNTANSSEIKVKVEPADSVESSPPSITHSPQN
Q38953_505	DMPEWKKDAFGKTPTFGQRSKLSIQEQRESLPIYKLKKELI
Q3U1U7_542	SLPVTIGTPCNPVLSLDVPIKMENESGSQDIVEASTTSCLW
Q3U1U7_583	LGTSDMARGHLVGFPARMHLKTEPDYRQQACTPHLGHGMLG
Q3U1U7_660	CSHSESQHPSLDQDCRAPIVKREPLDSPSWAAPGQVTVPRM
Q42547_423	AEKVPTPTNSYTGIRTKCVIKKENNFKQAGDRYRSWAPDRQ
Q49A26_269	TSIQAADSTAVNGSITPTDKKIGFLGLGLMGSGIVSNLLKM
Q4DIR8_23	ENHANDSNNNNGEAGEKPAVKSETPLVSIKVVNADGAEMFF
Q4LE39_429	PEKVVNKQCKECENVKEIKVKEENETEIKEIKMEEERNIIP
Q4LE39_440	CENVKEIKVKEENETEIKEIKMEEERNIIPREEKPIEDEIE
Q505F1_238	ARSAGLLDSGMFVNIHPSGIKTEPAMLMAPDKAESCQGDLS
Q55CL6_105	TTSGTFKEGDLLINKKGLLIKGESPKNSSVNDRNKNKSLHS
Q5SVZ6_25	LLGGECDKAVASQLGLLDEIKTEPDNAQEYCHRQQSRTQEN
Q5VZL5_250	ANKESIGSELGNSFASNIRIKEEPLDDEYDKAMAPQQGLLD
Q60591_897	RAAKNGPSDQKEALPTGVTVKQEQNLDQTYLDDVNEIIRKE
Q60793_275	SHPVVVAPYSGGPPRMCPKIKQEAVPSCTVSRSLEAHLSAG
Q60864_123	ANNLQLKEGLQNMEARLAERKFMNPFNLPNLYQKLENDPRT
Q60864_210	MDEEEEAATPPPPPPPKKEPKPEPMEEDLPENKKQALKEKE
Q60864_312	NREDYRQIAKAYARIGNSYFKEEKYKDAIHFYNKSLAEHRT
Q60864_395	DYPQAMKHYTEAIKRNPRDAKLYSNRAACYTKLLEFQLALK
Q60864_486	DGYQRCMMAQYNRHDSPEDVKRRAMADPEVQQIMSDPAMRL
Q60974_1117	ISLGLPRQQESTKAAPLTYIKQEEFSPRSQNSQPEGLLVRA
Q60974_1330	GTPRATAESFEDGLKYPKQIKRESPPIRAFEGAITKGKPYD
Q60974_152	TLPEGLRSSANAKKDPAFGVKHEAPSSPLSGQPCGDDQNAS
Q60974_260	YDENRKKAEEAHKIFEGLGPKVELPLYNQPSDTKVYHENIK
Q61183_444	PKESPDREEFRTMWVIGLVFKKTENSENLSVDLTYDIQSFT
Q61183_445	KESPDREEFRTMWVIGLVFKKTENSENLSVDLTYDIQSFTD
Q61183_506	MHVKRKQLHQLLPSHVLQKRKKHSTEGVKLTALNDSSLDLS
Q61183_507	HVKRKQLHQLLPSHVLQKRKKHSTEGVKLTALNDSSLDLSM
Q61183_730	TSSTDLSDIPALPANPIPVIKNSIKLRLNRXXXXXXXXXXX
Q61183_734	DLSDIPALPANPIPVIKNSIKLRLNRXXXXXXXXXXXXXXX
Q61624_115	DTHERLPQGLQYALNVPISVKQEITFTDVSEQLMRDKKQVR
Q61624_356	SDLKKDKNDYLPLYSSSTKVKDEYMVAEYAVEMPHSSVGGS
Q62915_679	LIPSPELQEWRVACIAMEKTKQEQQASCTWFGKKKKQYKDK
Q63120_949	IKNVNVLKEKEKEVEGQKLIKKEFVETGKVKFSIYLKYLQA
Q64127_724	PAGADSTHKVPVVMLEPIRIKQENSGPPENYDFPVVIVKQE
Q64127_742	RIKQENSGPPENYDFPVVIVKQESDEESRPQNTNYPRSILT
Q680Q4_100	GASDLASKGQVSSDTSNLKVKGEPEDPFQPEIKVRCVCGNS
Q680Q4_479	GELSQWHAPDGSLCPSAVDIKRKMEMLPVKQEGYSDGPAPL
Q680Q4_488	DGSLCPSAVDIKRKMEMLPVKQEGYSDGPAPLKLGIRKNRN
Q6DJT9_244	RKDHLTRHMKKSHNQELLKVKTEPVDFLDPFTCNVSVPIKD
Q6DJT9_263	VKTEPVDFLDPFTCNVSVPIKDELLPVMSLPSSELLSKPFT
Q6NZI2_161	NEAELLRRRNFKVMIYQDEVKLPAKLSISKSLKESEALPEK
Q75MX6_495	SMSEDCGPGTSGELGGLRPIKIEPEDLDIIQVTVPDPSPTS
Q7KPL1_112	FPHVIYARIWRWPDLHKNELKHVKYCAFAFDLKCDSVCVNP
Q7KPL1_159	VSPGIDLSGLSLQSGPSRLVKDEYSAGPLVGSMDIDGNDIG
Q7KPL1_222	EYVGDANPMSAMFPTGRTIPKIEPQDGVAGSRGSWMVPPPP
Q7LC44_110	SIKACLCRCQETIANLERWVKREMHVWREVFYRLERWADRL
Q7LC44_268	GPAKKWWEFKQGSVKNWVEFKKEFLQYSEGTLSREAIQREL
Q7T246_123	FSLDEWDYMKGNKDLYEEGIKEEPQQLHPLDCEYEDKRDIP
Q7T246_187	CAKENLTISPVEQPPPANGIKEERASCEEGNQSDCSINPLT
Q7T246_233	TDKPTPIMGYSLNNSSANYIKEEVVQCHEGNHSDMRIITAP
Q86B87_160	QQQIPAQRVQRQQPRASARYKIETVDDGLGDEKQSTTQIVI
Q86B87_423	AATSASATKIPPRKRGRPKTKVEDQTPKPKLLEKLQAATLN
Q86U86_1293	GLKRFSLSAKVVDDEIYYFRKPIVPQKEPSPLLEKKIQLLE
Q86YP4_30	SQKRALERDPTEDDVESKKIKMERGLLASDLNTDGDMRVTP
Q86YP4_487	QQEQEIEQRLLQQGTAPAQAKAEPTAAPHPVLKQVIKPRRK
Q8IX12_1012	SESLQEDMLGNRLLLPTPTVKQESKDVEENVGLIVYNGAMV
Q8IXT5_151	GFHTNGTGHGNLRPRKTRPLKAENPYLFLRGLPYLVNEDDV
Q8IYA6_198	NFLKETNKENLLDILTEPERKPDPKLYTRSKPKTDSYNQTK
Q8IZL8_826	ATPPPIAPTGPPTASPPVPAKEEPEELPAAPGPLPPPPPPP
Q8IZQ8_571	KQKRNNCSEKKPLPFLAASIKQEEAVSSCPFASQVPVKRQS
Q8K400_766	KMVANDLAKMSRKLSLPTDLKPDLDVKDNSFSRSRSSSVTS
Q8N2W9_128	YPVLYGKYLNGLGRLPAKTLKPEVRLVKLPFFNMLDELLKP
Q8N2W9_35	FRVSDLQMLLGFVGRSKSGLKHELVTRALQLVQFDCSPELF
Q8N3X1_348	PLLPEGIKEEEERWRRKVICKEEPVSEVKETSTTVEEATTI
Q8N4C6_1641	KEKEPGNSALEEREQEKFNLKEELERCKVQSSTLVSSLEAE
Q8N4C6_1680	AELSEVKIQTHIVQQENHLLKDELEKMKQLHRCPDLSDFQQ
Q8N680_505	LLGSGDSEVTEPDHPVLASIKKEQETVLLDXXXXXXXXXXX
Q8NAP3_43	LNEQRIRGILCDVTIIVEDTKFKAHSNVLAASSLYFKNIFW
Q8ND82_273	KYHMKHCCPDMITKFLGVIVKSERPCDEDKTDSETGKLIML
Q8ND82_75	KPAISNILNRGHSSSSSKGIKSEPHSPGIPEIFRTASQRCR
Q8NEB9_840	FSLMVDANIPDIALEPDKTVKKVQDKFRLDLSDEEAVHYMQ
Q8NHM5_890	RSWKNAEDRMALANKPLRRFKQEPEDELPEAPPKTRESDHS
Q8TAD8_30	RGSRRRHRDGDVVLPAGVVVKQERLSPEVAPPAHRRPDHSG
Q8TEQ6_754	LSQPKAKPKKKKKPTLRTPVKLESIDGNEEESMKENSGPVE
Q8W234_200	QQHGQVQQQQQKMLRNLGSVKLEPQQIQAMRNLAQVKMEPQ
Q8WXI9_33	LLKRSLDPADERDDVLAKRLKMEGHEAMERLKMLALLKRKD
Q91ZP3_599	KMPKKGGRWWFSWRGRNATIKEESKPEQCLTGKGHNTGEQP
Q91ZP3_629	TGKGHNTGEQPAQLGLATRIKHESSSSDEEHAAAKPSGSSH
Q92317_141	EELFRQSRSRLHHNSVSDPVKSEDSSXXXXXXXXXXXXXXX
Q92585_217	HLNGGSNPSESFPLSLNKELKQEPVEDLPCMITGTVGSISQ
Q92585_299	KDPESSGSATQTPLAQDINIKTEFSPAAFEQEQLGSPQVRA
Q92766_615	QLEQDSIIEALLPLSMEAKIKQEITEGELKAFMTAPGGKKT
Q92793_1033	SKGEPRSEMMEEDLQGASQVKEETDIAEQKSEPMEVDEKKP
Q92793_1056	TDIAEQKSEPMEVDEKKPEVKVEVKEEEESSSNGTASQSTS
Q92793_998	VASAETNSQQPGPDVPVLEMKTETQAEDTEPDPGESKGEPR
Q92797_361	SSKDTRKRPRDDSDSTLKKMKLEPNLGEDDEDKDLEPGPSG
Q92797_483	GPGVEQTKQCKEEPKEEKVVKTESVLIKRRLSAQGQAISVV
Q92844_282	EAVCQEKFNMEFRDNPGNFVKTEETLFEIQGIDPIASAIQN
Q92985_444	GSPRYTIYLGFGQDLSAGRPKEKSLVLVKLEPWLCRVHLEG
Q92985_446	PRYTIYLGFGQDLSAGRPKEKSLVLVKLEPWLCRVHLEGTQ
Q92993_430	GLLSYRSYWSQTILEILMGLKSESGERPQITINEISEITSI
Q92993_451	SESGERPQITINEISEITSIKKEDVISTLQYLNLINYYKGQ
Q940Y3_447	NNESAPVKRVPGPYVASSNIKSEARGSGDLNNGVHKIVRTP
Q94KE2_402	RKKPRHVKYEDDNSSRVTTIKSEAEAPSKSQVPFSNQLKSS
Q969V6_499	MVTSPLTQLTLQASPLQILVKEEGPRAGSCCLSPGGRAELE
Q969V6_576	EQEKRAQQPAPAPAPLGTPVKQENSFSSCQLSQQPLGPAHP
Q969V6_624	PATNHIDPCAVAPGPPSVVVKQEALQPEPEPVPAPQLLLGP
Q96B97_598	LGTAGHRANSPSLFGTEGKPKMEPAASSQAAVEELRTQVRE
Q96EB6_734	GAGFGTDGDDQEAINEAISVKQEVTDMNYPSNKSXXXXXXX
Q96FA3_202	GLTTNGVLVMHPRNGFTEDSKPGIWREISVCGNVFSLRETR
Q96FA3_266	LCGATLLWRTAEGLSHTPTVKHLEALRQEINAARPQCPVGF
Q96FA3_295	INAARPQCPVGFNTLAFPSMKRKDVVDEKQPWVYLNCGHVH
Q96FA3_297	AARPQCPVGFNTLAFPSMKRKDVVDEKQPWVYLNCGHVHGY
Q96FA3_303	PVGFNTLAFPSMKRKDVVDEKQPWVYLNCGHVHGYHNWGNK
Q96FV9_595	EVFANKLGEQWKILAPYLEMKDSEIRQIECDSEDMKMRAKQ
Q96QD9_140	MNRPPLSDKNIEQYFPVLKRKANLLRQNEGQRKPVAVLKRP
Q96RT1_506	PYPDELKNMVKTVQTIVHRLKDEETNEDSGRDLKPHEDQQD
Q96T23_254	ETKKEEETPKQEEQKESEKMKSEEQPMDLENRSTANVLEET
Q96T23_277	EQPMDLENRSTANVLEETTVKKEKEDEKELVKLPVIVKLEK
Q96T23_278	QPMDLENRSTANVLEETTVKKEKEDEKELVKLPVIVKLEKP
Q96T23_294	TTVKKEKEDEKELVKLPVIVKLEKPLPENEEKKIIKEESDS
Q96T23_309	LPVIVKLEKPLPENEEKKIIKEESDSFKENVKPIKVEVKEC
Q96T23_419	VKGPLCKSVTPTKEFLKDEIKQEEETCKRISTITALGHEGK
Q96T23_456	HEGKQLVNGEVSDERVAPNFKTEPIETKFYETKEESYSPSK
Q99497_130	TALLAHEIGFGSKVTTHPLAKDKMMNGGHYTYSENRVEKDG
Q99607_657	LLTRSPTPAPFSPFNPTSLIKMEPHDIXXXXXXXXXXXXXX
Q99683_1083	DKIVRNLMESLAQGAEEPKLKWEHITTLIASLREFVRSTDR
Q99683_1114	LREFVRSTDRKIIATTLSKLKLELDFDSHGISQVQVVLFGF
Q99683_535	VETILIYKHFVKLTTEQPVAKQELVDFWMDFLVEATKTDVT
Q99814_394	FDSSGKGAVSEKSNFLFTKLKEEPEELAQLAPTPGDAIISL
Q99856_398	SSLGLAASTNGSSITPAPKIKKEEDSAIPITVPGRLPVSLA
Q99958_214	APATPHLADAPKEAEKKVVIKSEAASPALPVITKVETLSPE
Q99958_227	AEKKVVIKSEAASPALPVITKVETLSPESALQGSPRSAAST
Q99PV8_679	PAPLPSPGLGGPALHAAKRIKVEKDLELPPAALIPSENVYS
Q99PV8_877	STLEKHMKKWHGEHLLTNDVKIEQAERSXXXXXXXXXXXXX
Q9BUJ2_117	GHYAMDNITRQNQFYDTQVIKQENESGYERRPLEMEQQQAY
Q9BYV9_202	RDQMLPEPISFEAAAIPVAEKEEALLPEPDVPTDTKESSEK
Q9BYV9_276	TFREDNSSNSLKPGLARGQIKSEPPSEENEEESITLCLSGD
Q9BYV9_421	EVSNFTMGSPLRGPGLEALCKQEGELDRRSVIFSSSACDQV
Q9BYV9_580	EHQEPGLMGDGMYNQVRPQIKCEQSYGTNSSDESGSFSEAD
Q9CAE3_287	RDKCPLYRVDGKPVDPDVDIKVEVAFNQLLDKASKLRQLMG
Q9CAE3_693	KSPAILRVTLSEPRKRNEDPKADQHSNKILFQQLQSHFNQQ
Q9CAE3_770	VKLVGRKGLGVGADSVIASIKAERTGRKLPSSSTSGTKSGX
Q9FNB4_320	PATTSEARAGNVCSVNLRTVKSEIIEESVRQATESTQVSPI
Q9H063_35	QLTVETGDAHIIGRIESYSCKMAGDDKHMFKQFCQEGQPHV
Q9H2G2_487	LKSEEEKDQEKQQMFENKLIKSEEIKDTILQTVDLVSQETG
Q9H2X6_1191	TYISASPASTVYTGYPLSPAKVNQYPYIXXXXXXXXXXXXX
Q9H2X6_32	VQVFSPHTLQSSAFCSVKKLKIEPSSNWDMTGYGSHSKVYS
Q9H307_304	RPRRQSMKEKEHQVVRNEEQKAEQEEGKVAQREEELEETGN
Q9H3D4_588	QGLTTIYQIEHYSMDDLASLKIPEQFRHAIWKGILDHRQLH
Q9H3D4_676	DEWNDFNFDMDARRNKQQRIKEEGEXXXXXXXXXXXXXXXX
Q9HAZ2_752	NFPHSLYPFTDRALAHNLLVKAEPKSPRDALKVGGPSAECP
Q9JIX5_609	LDIKITDDEEEEEVDVTGPIKPEPILPEPVPEPDGETLPSM
Q9JLQ4_237	QAGDYQSNFQLIAPSTSFQIKVDPMPPFQLGAAPENGLDGG
Q9JLQ4_424	QEHKYNPVPTSYAPFVGMPVKADGKAFCNVGFFEEFPLQEP
Q9LSE2_393	PTSSSFHPLTPTPQTLSCRVKEELCPSSLPSPKGQQARVEV
Q9M0K4_258	MMINNSNWTLNDIVFGSKCKKQEHHIYREASDCNSSAEFFS
Q9M7Q7_14	XXXXXXXMLELRLVQGSLLKKVLESIKDLVNDANFDCSSTG
Q9M7Q7_20	XMLELRLVQGSLLKKVLESIKDLVNDANFDCSSTGFSLQAM
Q9M7Q7_217	IEMKEPVSLSFALRYMNSFTKATPLSDTVTISLSSELPVVV
Q9M7Q7_240	PLSDTVTISLSSELPVVVEYKVAEMGYIRYYLAPKIEEEED
Q9N658_509	RKHTGYKPFGCHLCDQSFQRKVDLRRHRESRHEEAPPVEDL
Q9N6D8_26	PMSWHKESTDSEDDSTEVDIKEDIPKTVEVSGSELTTEPMA
Q9N6D8_302	SVPEAAEEDEPSKVRRCIAIKTEDTESNDSRDCDDSAAEWN
Q9NP62_156	FWRHDGRFIFFQSKGEHDHPKPETKLEAEARRAMKKVNTAP
Q9NS56_560	GKDEQINKGHCDSSTRIKSKKEEKRSTSLSSPRNLNSSVRG
Q9NSC2_1086	NLGPNQNSAVIPANSLSSLIKTEVNGFVHVSPQDSKDTPTS
Q9NUW8_111	SSDDELQPEMPQKQAEKVVIKKEKDISAPNDGTAQRTENHG
Q9NUW8_139	PNDGTAQRTENHGAPACHRLKEEEDEYETSGEGQDIWDMLD
Q9NYF8_831	VFAGTNTGPNNSNTTFQKRPKEEEWDPEYTPKSKKYFLHDD
Q9NZN4_315	NDLVKRARLVRVHAYIISYLKKEMPSVFGKENKKKQLILKL
Q9P1Z2_29	APSRGGVNFLNVARTYIPNTKVECHYTLPPGTMPSASDWIG
Q9QXZ7_178	ATRAMGHHFMASLITAETCAKLEPEDAEENIDVTSNDPEFP
Q9QXZ7_315	FRALAVDPTEFACLKALVLFKPETRGLKDPEHVEALQDQSQ
Q9QXZ7_322	PTEFACLKALVLFKPETRGLKDPEHVEALQDQSQVMLSQHS
Q9QYE3_634	SGGLSKKLLLGSPSSLSPFSKRIKLEKEFDLPPAAMPNTEN
Q9SBG3_283	SFSEFDHSYQQAGVSPDHETKPDITGCCSNQSQWSLFEKWL
Q9SJN0_391	RSRARKQAYTVELEAELNQLKEENAQLKHALAELERKRKQQ
Q9U1H5_438	GGGGGGQVSCQSHSPSDSSIKSEPVSPSPSAIALNNNNNIN
Q9UBD0_215	PYFQRDSPHLLVRMKRRVGVKSAPRHQEEDKPEAAGSCLAP
Q9UBG0_1142	LPPAPGTELSYLNGTFRLLQKPLRWHDALLLCESRNASLAY
Q9UBT2_190	FPGCTIRNTPSEPIHCIVWAKYLFNQLFGEEDADQEVSPDR
Q9UBT2_236	AWEPTEAEARARASNEDGDIKRISTKEWAKSTGYDPVKLFT
Q9UBT2_257	RISTKEWAKSTGYDPVKLFTKLFKDDIRYLLTMDKLWRKRK
Q9UBT2_271	PVKLFTKLFKDDIRYLLTMDKLWRKRKPPVPLDWAEVQSQG
Q9UBT2_275	FTKLFKDDIRYLLTMDKLWRKRKPPVPLDWAEVQSQGEETN
Q9UBT2_540	DDFLQDYTLLINILHSEDLGKDVEFEVVGDAPEKVGPKQAE
Q9UBW7_963	SDALDTELLTMTDMMSEDEGKTETTNINSVIIETDIIGSDL
Q9UER7_630	STSFNGGVSPHNWGDSGPPCKKSRKEKKQTGSGPLGNSYVE
Q9UER7_631	TSFNGGVSPHNWGDSGPPCKKSRKEKKQTGSGPLGNSYVER
Q9UGC6_121	FLRTEYSEENLLFWLACEDLKKEQNKKVIEEKARMIYEDYI
Q9UHF7_1192	RPGPTANGASKEKTKAPPNVKNEGPLNVVKTEKVDRSTQDE
Q9UHF7_1201	SKEKTKAPPNVKNEGPLNVVKTEKVDRSTQDELSTKCVHCG
Q9UHP3_99	RYISVGSQADTNVIDLTGDDKDDLQRAIALSLAESNRAFRE
Q9UIS9_499	ALLQEAQCSGLSWVVALPQVKQEKADTQDEWTPGTAVLTSP
Q9UIS9_538	SPVLVPGCPSKAVDPGLPSVKQEPPDPEEDKEENKDDSASK
Q9UJX5_772	WELDESSDEEEEASNKPVKIKEEVLSESEAENQQAGAAALA
Q9UJX5_798	ESEAENQQAGAAALAPEIVIKVEKLDPELDSXXXXXXXXXX
Q9UKF6_462	HIEVHNPRNTEAVTLNFRGEKLAKVMGFLADKKPEQGQRVS
Q9UKF6_465	VHNPRNTEAVTLNFRGEKLAKVMGFLADKKPEQGQRVSGIL
Q9UKF6_545	LLCYQLQKLTGDVEELEIQEKPALKVFKNITVIQEPGMVVL
Q9UKL0_297	VDQNKESKKEVPPTETVPQVKKEKHSTQAKNRAKRKPPKGM
Q9UKL3_1813	TYIDLTTESPSSCEVKKDELKSEPGSNCDNSELPGTLHNSH
Q9UKV3_532	YSAQKDLEPESDRSAQPLPLKIEELALAKGITEECLKQPSL
Q9ULU4_645	MDKEPSAVKKKPKPTNPVEIKEELKSTSPASEKADPGAVKD
Q9UPN6_18	XXXMEAVKTFNSELYSLNDYKPPISKAKMTQITKAAIKAIK
Q9UPW6_233	NVSATKCQEFGRWYKKYKKIKVERVERENLSDYCVLGQRPM
Q9UPW6_350	QHPQAINQQFLNHPPIPRAVKPEPTNSSVEVSPDIYQQVRD
Q9UQ80_298	FTLRAFEDEKKARMGVVECAKHELLQPFNVLYEKEGEFVAQ
Q9UQ80_93	GIAFPTSISVNNCVCHFSPLKSDQDYILKEGDLVKIDLGVH
Q9VEZ5_186	ALRKALHFLHSQCGICHRDLKPDNIVIQRGVDGKKIYKLTD
Q9Y230_456	ESRSTQYMKEYQDAFLFNELKGETMDTSXXXXXXXXXXXXX
Q9Y265_225	RCDTYATEFDLEAEEYVPLPKGDVHKKKEIIQDVTLHDLDV
Q9Y2K1_328	ESEIASEEKSRAAERKRIIIKMEPEDIPTDELKDFNIIKVT
Q9Y2W7_26	EVTKASDGSLLGDLGHTPLSKKEGIKWQRPRLSRQALMRCC
Q9Y2W7_90	STVRHQPEGLDQLQAQTKFTKKELQSLYRGFKNECPTGLVD
Q9Y2X3_467	QVDKEDEITEKKAKKAKIKVKVEEEEEEKVAEEEETSVKKK
Q9Y2X3_497	AEEEETSVKKKKKRGKKKHIKEEPLSEEEPCTSTAIASPEK
Q9Y458_63	EEEERRSSAAGKSEPLEKQPKTEPSTSASSGCGSDSGYGNS
Q9Y4E5_706	YEEHHSIDYVFVSEKTETSIKTEDDFPVIETSNQLTCGCRE
Q9Y4K3_124	KCPVDNEILLENQLFPDNFAKREILSLMVKCPNEGCLHKME
Q9Y4K3_142	FAKREILSLMVKCPNEGCLHKMELRHLEDHQAHCEFALMDC
Q9Y4K3_453	TILDQSEAPVRQNHEEIMDAKPELLAFQRPTIPRNPKGFGY
Q9Y5Q3_297	VEQLKQEVSRLARERDAYKVKCEKLANSGFREAGSTSDSPS
Q9Y6K9_277	GMQLEDLKQQLQQAEEALVAKQEVIDKLKEEAEQHKIVMET
Q9Y6K9_309	EQHKIVMETVPVLKAQADIYKADFQAERQAREKLAEKKELL
Q9Y6Q9_1194	LQQRLQGQQFLNQSRQALELKMENPTAGGAAVMRPMMQPQV
Q9Y6Q9_786	MSQCTSSTIPSSSQEKDPKIKTETSEEGSGDLDNLDAILGD
Q9Z104_125	GAEWSKLQPAEKQRYLDEAEKEKQQYLKELWAYQQSEAYKV
Q9Z104_156	AYQQSEAYKVCTEKIQENKIKKEDSSSGLMNTLLNGHKGVD
Q9Z104_157	YQQSEAYKVCTEKIQENKIKKEDSSSGLMNTLLNGHKGVDC
Q9Z104_31	ATAPAGGKTPGQHGAFVVAVKQERSEGSRAGEKGPQEEEPV
Q9ZQ70_508	QHNTSTVNFNHQQPVARLRLKEEQITXXXXXXXXXXXXXXX
