# Supplementary material for: An application of topological data analysis in predicting sumoylation sites
Source: PeerJ. 2023 Oct 12;11:e16204. doi: 10.7717/peerj.16204 (PMC10576966; doi:10.7717/peerj.16204)
Supplement: Supplemental Information 9 [file peerj-11-16204-s009.xlsx]

## Sheet: neg_seqs_deredundant
ue_pos	seq
A0AUZ9_100	VFLMRSNSTLNKHNENYKQKKLGEPSCNKLKNILYNGSNIQ
A0AUZ9_198	ALLDKVTDAEIKKGLLHCTQKKIVPGHSNVPVSSSAAEKEE
A0AUZ9_255	LSQARRTQKHLQMLLAKHVVKHYGQQMKLSMKHQLPKMKTF
A0AUZ9_359	LDSDATDSSSDDDLDEYTLRKNVAVNCSTEWKWLVDRARVG
A0AUZ9_395	RARVGSRWTWLQAQISDLECKIQQLTDIHRQIRASKGIVVL
A0AUZ9_422	IHRQIRASKGIVVLEECQLPKDILKKQMQFADQAASLNILG
A0AUZ9_426	IRASKGIVVLEECQLPKDILKKQMQFADQAASLNILGNPQV
A0AUZ9_427	RASKGIVVLEECQLPKDILKKQMQFADQAASLNILGNPQVP
A0AUZ9_475	PEQDFEMSPSSPTLLLRNIEKQSAQLTEIINSLIAPLNLSP
A0AUZ9_508	IAPLNLSPTSSPLSSKSCSHKCLANGIYRSASENLDELSSS
A0AUZ9_536	RSASENLDELSSSSSWLLNQKHSKKKRKDRTRLKSSSLTFM
A0AUZ9_539	SENLDELSSSSSWLLNQKHSKKKRKDRTRLKSSSLTFMSTS
A0AUZ9_549	SSWLLNQKHSKKKRKDRTRLKSSSLTFMSTSARTRPLQSFH
A0AUZ9_570	SSSLTFMSTSARTRPLQSFHKRKLYRLSPTFYWTPQTLPSK
A0AUZ9_572	SLTFMSTSARTRPLQSFHKRKLYRLSPTFYWTPQTLPSKET
A0AUZ9_653	HSVLSLPSDVPLHFHFETLLKKTEIKGNLAENKFVDEYIIS
A0AUZ9_654	SVLSLPSDVPLHFHFETLLKKTEIKGNLAENKFVDEYIISP
A0AUZ9_658	LPSDVPLHFHFETLLKKTEIKGNLAENKFVDEYIISPSPVH
A0AUZ9_665	HFHFETLLKKTEIKGNLAENKFVDEYIISPSPVHSTLNQWR
A0AUZ9_710	PICKPQIRSESSAQLLQGRKKRHLSETALGERTKLEESDFQ
A0AUZ9_793	DNIVIPMSLVAPAKLEKLQYKEILTPSWRMVVLQPLDEYNL
A0AUZ9_848	LRHKKYEEREQARWSLWEQSKWHRRNSRAYSKNVEGQDLLL
A0AUZ9_859	ARWSLWEQSKWHRRNSRAYSKNVEGQDLLLKEYPNNFSSSQ
A0AUZ9_911	SENQDLCAYGLPSLNQSQETKSLWWERRAFPLKGEDMAALL
A0AUZ9_937	RRAFPLKGEDMAALLCQDEKKDQVERSSTAFHGEIFGTSVP
A0AUZ9_964	STAFHGEIFGTSVPENGHHPKKQSDGMEEYKTFGLGLTNVK
A2AJT9_123	RGDSNRRAQYMPKYSEGIPYKEHERNSYPQKVQGGHSPDDH
A2AJT9_150	YPQKVQGGHSPDDHRVRGSGKGGKPPQRSIADSFRFEGKWH
A2AJT9_203	KYSQSTRRGSEDFETRSSFQKRYPEDRDFRKYGHTSKRPKD
A2AJT9_219	SSFQKRYPEDRDFRKYGHTSKRPKDVERYESREPARNPKWK
A2AJT9_222	QKRYPEDRDFRKYGHTSKRPKDVERYESREPARNPKWKPEH
A2AJT9_284	AEREHPETSSATKVSYDYRHKRPKLLDGDQDFSDGRTQKYC
A2AJT9_315	FSDGRTQKYCKEEDRKYSFQKGPLNRELDCFNTGRGRETQD
A2AJT9_370	IACTYSNKNDVDLRSSNDKWKEKIKKEGDCRKESNSSSNQL
A2AJT9_372	CTYSNKNDVDLRSSNDKWKEKIKKEGDCRKESNSSSNQLDK
A2AJT9_374	YSNKNDVDLRSSNDKWKEKIKKEGDCRKESNSSSNQLDKSQ
A2AJT9_375	SNKNDVDLRSSNDKWKEKIKKEGDCRKESNSSSNQLDKSQK
A2AJT9_381	DLRSSNDKWKEKIKKEGDCRKESNSSSNQLDKSQKLPDVKP
A2AJT9_409	QLDKSQKLPDVKPSPINLRKKSLTVKVDVKKTVDTFRVASS
A2AJT9_41	RNAEHYKQRHSHGHYGCEYRKDPKRPVAWRMDSEKHGQSKP
A2AJT9_419	VKPSPINLRKKSLTVKVDVKKTVDTFRVASSYSTERQMSHD
A2AJT9_534	LNSDPEIHRRIDMSLAELQSKQAVIYESEQTLIKIIDPNDL
A2AJT9_563	QTLIKIIDPNDLRHDIERRRKERLQNEDEHIFHIASAAERD
A2AJT9_617	TDGFQKPTHFIKSNFRKCIEKPYMNYTTQRKDIITHKPFEV
A2AJT9_669	FKSNFRGGRCQPNYKSGLVQKSLYIQAKYQRLRFTGPRGFI
A2AJT9_676	GRCQPNYKSGLVQKSLYIQAKYQRLRFTGPRGFITHKFRER
A2AJT9_701	RFTGPRGFITHKFRERLMRKKKEYTDVATGIXXXXXXXXXX
A2AJT9_702	FTGPRGFITHKFRERLMRKKKEYTDVATGIXXXXXXXXXXX
A6NFI3_118	LGTQERLSRGGDAKSPVLQEKGLQASRAPATPRDEDLEEEE
A6NFI3_314	PEGWGPDPGGLGVLADGSEAKPFLPGREPGANLLSPWAFPA
A6NFI3_352	FPAAVAPPAGRPETTCDVCGKVFPHRSRLAKHQRYHAAVKP
A6NFI3_569	AEAAAEEREEAAVAAPTPSGKVDPAPERRFLELGNGLGEGE
A6NFI3_605	LGEGEGPSSHPLGFHFPVHPKSWLHPDSFPILGLPDFRERL
A6NFI3_698	EPAPAALAEEESPWICSDCGKTFGRRAALAKHQRYHAGERP
A6NFI3_87	AQVEAVAEVEVEADVEEEDVKEVLAEEECPALGTQERLSRG
A6NHJ4_149	TQIKKLTGSTDRYDRRHPGNKPIKDQLGLSFHSHLPELHIF
A6NHJ4_72	MMLENYRNLHSVDISSKCMMKKFSSTAQGNTEVDTGTLERH
A6NHJ4_73	MLENYRNLHSVDISSKCMMKKFSSTAQGNTEVDTGTLERHE
A6NHR9_1005	CSSSGTSILTGSAIQVQNIKKDQTLKARIEIPSCKDVAPVE
A6NHR9_1019	QVQNIKKDQTLKARIEIPSCKDVAPVEKTIKLLPSSHVARL
A6NHR9_1053	SSHVARLQIFSVEGQKAIQIKHQDEVNWIAGDIMHNLIFQM
A6NHR9_1090	IFQMYDEGEREINITSALAEKIKVNWTPEINKEHLLQGLLP
A6NHR9_1092	QMYDEGEREINITSALAEKIKVNWTPEINKEHLLQGLLPDV
A6NHR9_112	KDGVTLYLLQSVNQLLLTATKERIDFLPHYDTLVKSGMYEY
A6NHR9_1149	QDDHVSLESAFTVRPLPDEPKHLKCEMKGGKTVQMGQELQG
A6NHR9_1159	FTVRPLPDEPKHLKCEMKGGKTVQMGQELQGEVVIIITDQY
A6NHR9_1207	SPSSLSSLSIAGVGLDSSNLKTTFQENTQSISVRGIKFIPG
A6NHR9_1232	ENTQSISVRGIKFIPGPPGNKDLCFTWREFSDFIRVQLISG
A6NHR9_1256	FTWREFSDFIRVQLISGPPAKLLLIDWPELKESIPVINGRD
A6NHR9_126	LLLTATKERIDFLPHYDTLVKSGMYEYYASEGQNPLPFALA
A6NHR9_1299	NPIIVQLCDQWDNPAPVQHVKISLTKASNLKLMPSNQQHKT
A6NHR9_1304	QLCDQWDNPAPVQHVKISLTKASNLKLMPSNQQHKTDEKGR
A6NHR9_1309	WDNPAPVQHVKISLTKASNLKLMPSNQQHKTDEKGRANLGV
A6NHR9_1318	VKISLTKASNLKLMPSNQQHKTDEKGRANLGVFSVFAPRGE
A6NHR9_1322	LTKASNLKLMPSNQQHKTDEKGRANLGVFSVFAPRGEHTLQ
A6NHR9_1344	RANLGVFSVFAPRGEHTLQVKAIYNKSIIEGPIIKLMILPD
A6NHR9_1358	EHTLQVKAIYNKSIIEGPIIKLMILPDPEKPVRLNVKYDKD
A6NHR9_1377	IKLMILPDPEKPVRLNVKYDKDASFLAGGLFTDFMISVISE
A6NHR9_1403	AGGLFTDFMISVISEDDSIIKNINPARISMKMWKLSTSGNR
A6NHR9_1413	SVISEDDSIIKNINPARISMKMWKLSTSGNRPPANAETFSC
A6NHR9_1441	GNRPPANAETFSCNKIKDNDKEDGCFYFRDKVIPNKVGTYC
A6NHR9_1451	FSCNKIKDNDKEDGCFYFRDKVIPNKVGTYCIQFGFMMDKT
A6NHR9_1456	IKDNDKEDGCFYFRDKVIPNKVGTYCIQFGFMMDKTNILNS
A6NHR9_1470	DKVIPNKVGTYCIQFGFMMDKTNILNSEQVIVEVLPNQPVK
A6NHR9_1490	KTNILNSEQVIVEVLPNQPVKLVPKIKPPTPAVSNVRSVAS
A6NHR9_1542	TDDYDNHTGIDLVGTIIATIKGSNEEDTDTPLFIGKVRTLE
A6NHR9_1557	IIATIKGSNEEDTDTPLFIGKVRTLEFPFVNGSAEIMSLVL
A6NHR9_1618	PLLSRTLEPYILPFMFYNDVKKQQQMAALTKEKDQLSQSIV
A6NHR9_1619	LLSRTLEPYILPFMFYNDVKKQQQMAALTKEKDQLSQSIVM
A6NHR9_1630	PFMFYNDVKKQQQMAALTKEKDQLSQSIVMYKSLFEASQQL
A6NHR9_1655	QSIVMYKSLFEASQQLLNEMKCQVEEARLKEAQLRNELKIH
A6NHR9_1673	EMKCQVEEARLKEAQLRNELKIHNIDIPTTQQVPHIEALLK
A6NHR9_168	LIDNSLSATSRNIGVRRIQIKLLFDETQGKPAVAVIDNGRG
A6NHR9_1693	KIHNIDIPTTQQVPHIEALLKRKLSEQEELKKKPRRSCTLP
A6NHR9_1695	HNIDIPTTQQVPHIEALLKRKLSEQEELKKKPRRSCTLPNY
A6NHR9_1704	QVPHIEALLKRKLSEQEELKKKPRRSCTLPNYTKGSGDVLG
A6NHR9_1781	RRIYDETQGRQQVLPLDSIYKKTLPDWKRSLPHFRNGKLYF
A6NHR9_1782	RIYDETQGRQQVLPLDSIYKKTLPDWKRSLPHFRNGKLYFK
A6NHR9_1798	SIYKKTLPDWKRSLPHFRNGKLYFKPIGDPVFARDLLTFPD
A6NHR9_1848	GMLLGDTIILDNLDAANHYRKEVVKITHCPTLLTRDGDRIR
A6NHR9_1872	KITHCPTLLTRDGDRIRSNGKFGGLQNKAPPMDKLRGMVFG
A6NHR9_1879	LLTRDGDRIRSNGKFGGLQNKAPPMDKLRGMVFGAPVPKQC
A6NHR9_1885	DRIRSNGKFGGLQNKAPPMDKLRGMVFGAPVPKQCLILGEQ
A6NHR9_1942	VNKDLNSQLEYLRTPDMRKKKQELDEHEKNLKLIEEKLGMT
A6NHR9_1950	LEYLRTPDMRKKKQELDEHEKNLKLIEEKLGMTPIRKCNDS
A6NHR9_1953	LRTPDMRKKKQELDEHEKNLKLIEEKLGMTPIRKCNDSLRH
A6NHR9_1987	CNDSLRHSPKVETTDCPVPPKRMRREATRQNRIITKTDVXX
A6NHR9_204	DNGRGMTSKQLNNWAVYRLSKFTRQGDFESDHSGYVRPVPV
A6NHR9_275	KPADSQDVHELVLSKEDFEKKEKNKEAIYSGYIRNRKPSDS
A6NHR9_277	ADSQDVHELVLSKEDFEKKEKNKEAIYSGYIRNRKPSDSVH
A6NHR9_336	KDSFTAVVITGVQPEHIQYLKNYFHLWTRQLAHIYHYYIHG
A6NHR9_36	TEEDGGGVGHRTVYLFDRREKESELGDRPLQVGERSDYAGF
A6NHR9_366	LAHIYHYYIHGPKGNEIRTSKEVEPFNNIDIEISMFEKGKV
A6NHR9_385	SKEVEPFNNIDIEISMFEKGKVPKIVNLREIQDDMQTLYVN
A6NHR9_468	KLKDEDDEDDCFILEKAARGKRPIFECFWNGRLIPYTSVED
A6NHR9_496	WNGRLIPYTSVEDFDWCTPPKKRGLAPIECYNRISGALFTN
A6NHR9_518	RGLAPIECYNRISGALFTNDKFQVSTNKLTFMDLELKLKDK
A6NHR9_564	RILNGQEQRMKIDREFALWLKDCHEKYDKQIKFTLFKGVIT
A6NHR9_569	QEQRMKIDREFALWLKDCHEKYDKQIKFTLFKGVITRPDLP
A6NHR9_591	DKQIKFTLFKGVITRPDLPSKKQGPWATYAAIEWDGKIYKA
A6NHR9_616	WATYAAIEWDGKIYKAGQLVKTIKTLPLFYGSIVRFFLYGD
A6NHR9_619	YAAIEWDGKIYKAGQLVKTIKTLPLFYGSIVRFFLYGDHDG
A6NHR9_668	VQIAMEPQALYDEVRTVPIAKLDRTVAEKAVKKYVEDEMAR
A6NHR9_679	DEVRTVPIAKLDRTVAEKAVKKYVEDEMARLPDRLSVTWPE
A6NHR9_680	EVRTVPIAKLDRTVAEKAVKKYVEDEMARLPDRLSVTWPEG
A6NHR9_725	PNEVRPAGTPIGALRIEILNKKGEAMQKLPGTSHGGSKKLL
A6NHR9_726	NEVRPAGTPIGALRIEILNKKGEAMQKLPGTSHGGSKKLLV
A6NHR9_742	ILNKKGEAMQKLPGTSHGGSKKLLVELKVILHSSSGNKEII
A6NHR9_743	LNKKGEAMQKLPGTSHGGSKKLLVELKVILHSSSGNKEIIS
A6NHR9_759	GGSKKLLVELKVILHSSSGNKEIISHISQHGGKWPYWFKKM
A6NHR9_777	GNKEIISHISQHGGKWPYWFKKMENIQKLGNYTLKLQVVLN
A6NHR9_778	NKEIISHISQHGGKWPYWFKKMENIQKLGNYTLKLQVVLNE
A6NHR9_80	VCQTLGISPEEKFVITTTSRKEITCDNFDETVKDGVTLYLL
A6NHR9_825	AGRPLPSKAIKFSVKEGKPEKFSFGLLDLPFRVGVPFNIPL
A6NHR9_891	SLHYEEITKGPNCVIRGVTAKGPVNSCQGKNYNLKVTLPGL
A6NHR9_900	GPNCVIRGVTAKGPVNSCQGKNYNLKVTLPGLKEDSQILKI
A6NHR9_933	EDSQILKIRLLPGHPRRLKVKPDSEILVIENGTAFPFQVEV
A7XYQ1_156	IKPPAEDDVSNVQIMCAWCQKVGIKRYSLSMGSEVKSFCSE
A7XYQ1_160	AEDDVSNVQIMCAWCQKVGIKRYSLSMGSEVKSFCSEKCFA
A7XYQ1_171	CAWCQKVGIKRYSLSMGSEVKSFCSEKCFAACRRAYFKRNK
A7XYQ1_188	SEVKSFCSEKCFAACRRAYFKRNKARDEDGHAENFPQQHYA
A7XYQ1_191	KSFCSEKCFAACRRAYFKRNKARDEDGHAENFPQQHYAKET
A7XYQ1_217	GHAENFPQQHYAKETPRLAFKNNCELLVCDWCKHIRHTKEY
A7XYQ1_235	AFKNNCELLVCDWCKHIRHTKEYLDFGDGERRLQFCSAKCL
A7XYQ1_253	HTKEYLDFGDGERRLQFCSAKCLNQYKMDIFYKETQANLPA
A7XYQ1_259	DFGDGERRLQFCSAKCLNQYKMDIFYKETQANLPAGLCSTL
A7XYQ1_265	RRLQFCSAKCLNQYKMDIFYKETQANLPAGLCSTLHPPMEN
A7XYQ1_286	ETQANLPAGLCSTLHPPMENKAEGTGVQLLTPDSWNIPLTD
A7XYQ1_310	TGVQLLTPDSWNIPLTDARRKAPSPVATAGQSQGPGPSAST
A7XYQ1_54	FAENTMNELLGWYGYDKVELKDGEDIEFRSYPTDGESRQHI
A7XYQ1_550	IVPLPVPIPIPIPIPHVSDSKPPNGFSSNGENFIPNAPGDS
A7XYQ1_736	AAAACNVIVNGTRGAAAEGAKSAEPPPEQPPPPPPPAPPKK
A7XYQ1_755	AKSAEPPPEQPPPPPPPAPPKKLLSPEEPAVSELESVKENN
A7XYQ1_78	DIEFRSYPTDGESRQHISVLKENSLPKPKLPEDSVISPYNI
A7XYQ1_788	LESVKENNCASNCHLDGEAAKKLMGEEALAGGDKSDPNLNN
A7XYQ1_789	ESVKENNCASNCHLDGEAAKKLMGEEALAGGDKSDPNLNNP
A7XYQ1_837	ALRMLPKTGCVIQPVPKPAEKAAMAPCIISSPMLSAGPEDL
A7XYQ1_86	TDGESRQHISVLKENSLPKPKLPEDSVISPYNISTGYSGLA
A7XYQ1_862	PCIISSPMLSAGPEDLEPPLKRRCLRIRNQNKXXXXXXXXX
A8MV65_124	EHFSRALGQAITLHPESAISKSKMGLTPLWRDSSALSSQRN
A8MV65_281	PLLMPSVHAARIPAPQCDITKTEPTTVTSATSAWAGAFHGT
A8MV65_319	HGTVDIVPSVGFDTGLQHQDKSKESPWYXXXXXXXXXXXXX
A8MV65_321	TVDIVPSVGFDTGLQHQDKSKESPWYXXXXXXXXXXXXXXX
A8MV65_43	MAATTCPTAYYQPAPQPGQQKKLAVFSKMQDSLEVTLPSKQ
A8MV65_44	AATTCPTAYYQPAPQPGQQKKLAVFSKMQDSLEVTLPSKQE
A8MW92_1007	PLARLPQLKRHIKQLLIDMGKVQQIATLCSVXXXXXXXXXX
A8MW92_112	EVLARWTDCRYYPAKIEAINKEGTFTVQFYDGVIRCLKRMH
A8MW92_129	AINKEGTFTVQFYDGVIRCLKRMHIKAMPEDAKGQVKSQHP
A8MW92_134	GTFTVQFYDGVIRCLKRMHIKAMPEDAKGQVKSQHPLSWCC
A8MW92_141	YDGVIRCLKRMHIKAMPEDAKGQVKSQHPLSWCCPIDPAGS
A8MW92_145	IRCLKRMHIKAMPEDAKGQVKSQHPLSWCCPIDPAGSCNQS
A8MW92_176	IDPAGSCNQSMGSEDWIALVKAAAAAAAKNKTGSKPRTSAN
A8MW92_184	QSMGSEDWIALVKAAAAAAAKNKTGSKPRTSANSNKDKDKD
A8MW92_186	MGSEDWIALVKAAAAAAAKNKTGSKPRTSANSNKDKDKDER
A8MW92_190	DWIALVKAAAAAAAKNKTGSKPRTSANSNKDKDKDERKWFK
A8MW92_201	AAAKNKTGSKPRTSANSNKDKDKDERKWFKVPSKKEETSTC
A8MW92_203	AKNKTGSKPRTSANSNKDKDKDERKWFKVPSKKEETSTCIA
A8MW92_214	SANSNKDKDKDERKWFKVPSKKEETSTCIATPDVEKKEDLP
A8MW92_229	FKVPSKKEETSTCIATPDVEKKEDLPTSSETFGLHVENVPK
A8MW92_230	KVPSKKEETSTCIATPDVEKKEDLPTSSETFGLHVENVPKM
A8MW92_249	KKEDLPTSSETFGLHVENVPKMVFPQPESTLSNKRKNNQGN
A8MW92_262	LHVENVPKMVFPQPESTLSNKRKNNQGNSFQAKRARLNKIT
A8MW92_27	NRPGITFEIGARLEALDYLQKWYPSRIEKIDYEEGKMLVHF
A8MW92_274	QPESTLSNKRKNNQGNSFQAKRARLNKITGLLASKAVGVDG
A8MW92_288	GNSFQAKRARLNKITGLLASKAVGVDGAEKKEDYNETAPML
A8MW92_320	DYNETAPMLEQAISPKPQSQKKNEADISSSANTQKPALLSS
A8MW92_334	PKPQSQKKNEADISSSANTQKPALLSSTLSSGKARSKKCKH
A8MW92_346	ISSSANTQKPALLSSTLSSGKARSKKCKHESGDSSGCIKPP
A8MW92_35	IGARLEALDYLQKWYPSRIEKIDYEEGKMLVHFERWSHRYD
A8MW92_350	ANTQKPALLSSTLSSGKARSKKCKHESGDSSGCIKPPKSPL
A8MW92_351	NTQKPALLSSTLSSGKARSKKCKHESGDSSGCIKPPKSPLS
A8MW92_353	QKPALLSSTLSSGKARSKKCKHESGDSSGCIKPPKSPLSPE
A8MW92_364	SGKARSKKCKHESGDSSGCIKPPKSPLSPELIQVEDLTLVS
A8MW92_367	ARSKKCKHESGDSSGCIKPPKSPLSPELIQVEDLTLVSQLS
A8MW92_393	ELIQVEDLTLVSQLSSSVINKTSPPQPVNPPRPFKHSERRR
A8MW92_430	ERRRRSQRLATLPMPDDSVEKVSSPSPATDGKVFSISSQNQ
A8MW92_502	EVTAPVASDSSYRNECPRAEKEDTQMLPNPSSKAIADGRGA
A8MW92_534	KAIADGRGAPAAAGISKTEKKVKLEDKSSTAFGKRKEKDKE
A8MW92_536	IADGRGAPAAAGISKTEKKVKLEDKSSTAFGKRKEKDKERR
A8MW92_547	GISKTEKKVKLEDKSSTAFGKRKEKDKERREKRDKDHYRPK
A8MW92_549	SKTEKKVKLEDKSSTAFGKRKEKDKERREKRDKDHYRPKQK
A8MW92_551	TEKKVKLEDKSSTAFGKRKEKDKERREKRDKDHYRPKQKKK
A8MW92_553	KKVKLEDKSSTAFGKRKEKDKERREKRDKDHYRPKQKKKKK
A8MW92_561	SSTAFGKRKEKDKERREKRDKDHYRPKQKKKKKKKKKSKQH
A8MW92_567	KRKEKDKERREKRDKDHYRPKQKKKKKKKKKSKQHDYSDYE
A8MW92_570	EKDKERREKRDKDHYRPKQKKKKKKKKKSKQHDYSDYEDSS
A8MW92_571	KDKERREKRDKDHYRPKQKKKKKKKKKSKQHDYSDYEDSSL
A8MW92_572	DKERREKRDKDHYRPKQKKKKKKKKKSKQHDYSDYEDSSLE
A8MW92_573	KERREKRDKDHYRPKQKKKKKKKKKSKQHDYSDYEDSSLEF
A8MW92_574	ERREKRDKDHYRPKQKKKKKKKKKSKQHDYSDYEDSSLEFL
A8MW92_575	RREKRDKDHYRPKQKKKKKKKKKSKQHDYSDYEDSSLEFLE
A8MW92_737	IPEQYICYICRDPPGQRWSAKYRYDKEWLNNGRMCGLSFFK
A8MW92_766	NNGRMCGLSFFKENYSHLNAKKIVSTHHLLADVYGVTEVLH
A8MW92_767	NGRMCGLSFFKENYSHLNAKKIVSTHHLLADVYGVTEVLHG
A8MW92_791	THHLLADVYGVTEVLHGLQLKIGILKNKHHPDLHLWACSGK
A8MW92_798	VYGVTEVLHGLQLKIGILKNKHHPDLHLWACSGKRKDQDQI
A8MW92_824	HLWACSGKRKDQDQIIAGVEKKIAQDTVNREEKKYVQNHKE
A8MW92_836	DQIIAGVEKKIAQDTVNREEKKYVQNHKEPPRLPLKMEGTY
A8MW92_837	QIIAGVEKKIAQDTVNREEKKYVQNHKEPPRLPLKMEGTYI
A8MW92_843	EKKIAQDTVNREEKKYVQNHKEPPRLPLKMEGTYITSEHSY
A8MW92_874	GTYITSEHSYQKPQSFGQDCKSLADPGSSDDDDVSSLEEEQ
A8MW92_88	LERPALRKEGLKDEEDFFDFKAGEEVLARWTDCRYYPAKIE
A8MW92_901	SSDDDDVSSLEEEQEFHMRSKNSLQYSAKEHGMPEKNPAEG
A8MW92_909	SLEEEQEFHMRSKNSLQYSAKEHGMPEKNPAEGNTVFVYND
A8MW92_916	FHMRSKNSLQYSAKEHGMPEKNPAEGNTVFVYNDKKGTEDP
A8MW92_930	EHGMPEKNPAEGNTVFVYNDKKGTEDPGDSHLQWQLNLLTH
A8MW92_967	LLTHIENVQNEVTSRMDLIEKEVDVLESWLDFTGELEPPDP
A8MW92_999	TGELEPPDPLARLPQLKRHIKQLLIDMGKVQQIATLCSVXX
A9YTQ3_17	XXXXMPRTMIPPGECTYAGRKRRRPLQKQRPAVGAEKSNPS
A9YTQ3_24	TMIPPGECTYAGRKRRRPLQKQRPAVGAEKSNPSKRHRDRL
A9YTQ3_257	SGFLTMQFQGKLKFLFGQKKKAPSGAMLPPRLSLFCIAAPV
A9YTQ3_322	ATADAKVKATTSLCESELHGKPNYSAGRSSRESGVLVLREQ
A9YTQ3_33	YAGRKRRRPLQKQRPAVGAEKSNPSKRHRDRLNAELDHLAS
A9YTQ3_38	RRRPLQKQRPAVGAEKSNPSKRHRDRLNAELDHLASLLPFP
A9YTQ3_410	GVTGRRETPGPTKPLPWTAGKHSEDGARPRLQPSKNDPPSL
B7Z6K7_118	GPILGDILHVADHQGTHHKQKLHRCEAWGNKLYDSGNFHQH
B7Z6K7_221	TECVSPIQCGGAHYSCGESMKHFSTKHILSQHQRLLTREEC
B7Z6K7_276	SLSNHQRVHTEKKHECGECGKSFSKYVSFSNHQRVHTEKKH
B7Z6K7_294	CGKSFSKYVSFSNHQRVHTEKKHECGECGKSFSKYVSFSNH
B7Z6K7_68	LALISSLGCWCGVEDEAAPSKQSIYIQRETQVRTPMAGVSP
B7Z6K7_853	CGKLFNKKSHLLVHQSSHWRKAIXXXXXXXXXXXXXXXXXX
C9JLR9_137	FNPARHGMVCMVCGSSLATLKLSTIKRHIRQKHPYSLHWSP
C9JLR9_142	HGMVCMVCGSSLATLKLSTIKRHIRQKHPYSLHWSPREKEV
C9JLR9_148	VCGSSLATLKLSTIKRHIRQKHPYSLHWSPREKEVISNSWD
C9JLR9_160	TIKRHIRQKHPYSLHWSPREKEVISNSWDAHLGLGACGEAE
C9JLR9_210	EEEEEEEEEEEGAGVPACPPKGPGKAPAGGGCRRQRRGGPV
C9JLR9_214	EEEEEEEGAGVPACPPKGPGKAPAGGGCRRQRRGGPVAPRA
C9JLR9_353	LSELTQSPPGDDLAPQDLTGKSRDSASAAGAPSSQDLSPPD
C9JLR9_483	PGSTRLGGPVQALIAREWSEKAAHLLALGPPRPESPQGPIP
C9JLR9_79	SWGSAPLPSSRARGPASSGRKYSDHCEARASRPGKSRIPGR
E9PAV3_1006	PTPPAATPPSPKGGPATPSPKGAPTPPAVTPPSPKGSPAAT
E9PAV3_1020	PATPSPKGAPTPPAVTPPSPKGSPAATPFPKGASTPPAATP
E9PAV3_128	GPPISPAALALASPMIAPTLKGTPSSSAPLALVALAPHSVQ
E9PAV3_1414	AIPSPKGDPTSPAVIPLSPKKAPATPVTREGAATPSKGDLT
E9PAV3_1482	KGDPTLPAVTPPSPKEPPAPKQVATSSSPKKAPATPAPMGA
E9PAV3_1491	TPPSPKEPPAPKQVATSSSPKKAPATPAPMGAPTLPAVIPS
E9PAV3_1492	PPSPKEPPAPKQVATSSSPKKAPATPAPMGAPTLPAVIPSS
E9PAV3_1597	KEASSPPAVTPSTYKGAPSPKELLIPPAVTSPSPKEAPTPP
E9PAV3_1660	PPVTPSSLKDSPTSPASVTCKMGATVPQASKGLPAKKGPTA
E9PAV3_1670	SPTSPASVTCKMGATVPQASKGLPAKKGPTALKEVLVAPAP
E9PAV3_1675	ASVTCKMGATVPQASKGLPAKKGPTALKEVLVAPAPESTPI
E9PAV3_1676	SVTCKMGATVPQASKGLPAKKGPTALKEVLVAPAPESTPII
E9PAV3_1682	GATVPQASKGLPAKKGPTALKEVLVAPAPESTPIITAPTRK
E9PAV3_1707	APAPESTPIITAPTRKGPQTKKSSATSPPICPDPSAKNGSK
E9PAV3_1708	PAPESTPIITAPTRKGPQTKKSSATSPPICPDPSAKNGSKG
E9PAV3_1727	KKSSATSPPICPDPSAKNGSKGPLSTVAPAPLLPVQKDSSK
E9PAV3_1743	KNGSKGPLSTVAPAPLLPVQKDSSKTAKGKDASHSPKGPLA
E9PAV3_1752	TVAPAPLLPVQKDSSKTAKGKDASHSPKGPLAPPESKASTP
E9PAV3_1759	LPVQKDSSKTAKGKDASHSPKGPLAPPESKASTPLTAAAFE
E9PAV3_1768	TAKGKDASHSPKGPLAPPESKASTPLTAAAFEKVLPKPESA
E9PAV3_1780	GPLAPPESKASTPLTAAAFEKVLPKPESASVSAAPSPPVSL
E9PAV3_1784	PPESKASTPLTAAAFEKVLPKPESASVSAAPSPPVSLPLAP
E9PAV3_1830	LPPKQQFLPSSPGLVLESPSKPLAPADEDELLPLIPPEPIS
E9PAV3_1878	VLVNMPTPKSAGIPVPTPSAKQPVTKNNKGSGTESDSDESV
E9PAV3_1886	KSAGIPVPTPSAKQPVTKNNKGSGTESDSDESVPELEEQDS
E9PAV3_190	GSVITLSAPIAPSEPKTNLNKVPSEVVPNPKGTPSPPCIVS
E9PAV3_1929	ATTQQAQLAAAAEIDEEPVSKAKQSRSEKKARKAMSKLGLR
E9PAV3_1931	TQQAQLAAAAEIDEEPVSKAKQSRSEKKARKAMSKLGLRQV
E9PAV3_1937	AAAAEIDEEPVSKAKQSRSEKKARKAMSKLGLRQVTGVTRV
E9PAV3_1938	AAAEIDEEPVSKAKQSRSEKKARKAMSKLGLRQVTGVTRVT
E9PAV3_1941	EIDEEPVSKAKQSRSEKKARKAMSKLGLRQVTGVTRVTIRK
E9PAV3_1976	RVTIRKSKNILFVITKPDVYKSPASDTYIVFGEAKIEDLSQ
E9PAV3_200	APSEPKTNLNKVPSEVVPNPKGTPSPPCIVSTVPYHCVTPM
E9PAV3_2042	TPTVQEESEEEEVDETGVEVKDIELVMSQANVSRAKAVRAL
E9PAV3_2057	TGVEVKDIELVMSQANVSRAKAVRALKNNSNDIVNAIMELT
E9PAV3_247	VASLPQTTPTTTLAIASPQVKDTTISSVLISPQNPGSLSLK
E9PAV3_337	FGSVQLLGQTGPSALSDPTVKTISVDHSSTGASYPSQRSVI
E9PAV3_383	RNEVVPATVAAFPVVAPSVDKGPSTISSITCSPSGSLNVAT
E9PAV3_416	SGSLNVATSFSLSPTTSLILKSSPNATYHYPLVAQMPVSSV
E9PAV3_491	PISNIEPTSPAALVMAPVAPKEPSTQVATTLRIPVSPPLPD
E9PAV3_516	QVATTLRIPVSPPLPDPEDLKNLPSSVLVKFPTQKDLQTVP
E9PAV3_525	VSPPLPDPEDLKNLPSSVLVKFPTQKDLQTVPASLEGAPFS
E9PAV3_554	TVPASLEGAPFSPAQAGLTTKKDPTVLPLVQAAPKNSPSFQ
E9PAV3_555	VPASLEGAPFSPAQAGLTTKKDPTVLPLVQAAPKNSPSFQS
E9PAV3_568	QAGLTTKKDPTVLPLVQAAPKNSPSFQSTSSSPEIPLSPEA
E9PAV3_593	FQSTSSSPEIPLSPEATLAKKSLGEPLPIGKPASSMTSPLG
E9PAV3_603	PLSPEATLAKKSLGEPLPIGKPASSMTSPLGVNSSASVIKT
E9PAV3_686	TSTYTTTASPFLEGTVSLAPKNHPVKEGTLTTLPLVPTASE
E9PAV3_691	TTASPFLEGTVSLAPKNHPVKEGTLTTLPLVPTASENCPVA
E9PAV3_749	EIPKSVPSPSLPPAGTPPGTKKVDGISHTSALAPVASSPKE
E9PAV3_750	IPKSVPSPSLPPAGTPPGTKKVDGISHTSALAPVASSPKEC
E9PAV3_806	TLTYLADSPSPLGVSVSPQTKRPPTKKGSAGPDTPIGNLSS
E9PAV3_811	ADSPSPLGVSVSPQTKRPPTKKGSAGPDTPIGNLSSPVSPV
O00148_130	NGQVTVLVMCHTRELAFQISKEYERFSKYMPSVKVSVFFGG
O00148_143	ELAFQISKEYERFSKYMPSVKVSVFFGGLSIKKDEEVLKKN
O00148_199	VRNRSFSLKNVKHFVLDECDKMLEQLDMRRDVQEIFRLTPH
O00148_221	LEQLDMRRDVQEIFRLTPHEKQCMMFSATLSKDIRPVCRKF
O00148_232	EIFRLTPHEKQCMMFSATLSKDIRPVCRKFMQDPMEVFVDD
O00193_164	KEESAEELQAAEHPDEVEDPKNKKDAKSNYKMMFVKSSGSX
O00193_170	ELQAAEHPDEVEDPKNKKDAKSNYKMMFVKSSGSXXXXXXX
O00193_179	EVEDPKNKKDAKSNYKMMFVKSSGSXXXXXXXXXXXXXXXX
O00193_38	PDDDLGSSNWEAADLGNEERKQKFLRLMGAGKKEHTGRLVI
O00231_118	DMEAATGQEVELCLECIEWAKSEKRTFLRQALEARLVSLYF
O00231_121	AATGQEVELCLECIEWAKSEKRTFLRQALEARLVSLYFDTK
O00231_141	KRTFLRQALEARLVSLYFDTKRYQEALHLGSQLLRELKKMD
O00231_185	LLVEVQLLESKTYHALSNLPKARAALTSARTTANAIYCPPK
O00231_223	PPKLQATLDMQSGIIHAAEEKDWKTAYSYFYEAFEGYDSID
O00231_246	KTAYSYFYEAFEGYDSIDSPKAITSLKYMLLCKIMLNTPED
O00231_288	QALVSGKLALRYAGRQTEALKCVAQASKNRSLADFEKALTD
O00231_295	LALRYAGRQTEALKCVAQASKNRSLADFEKALTDYRAELRD
O00231_304	TEALKCVAQASKNRSLADFEKALTDYRAELRDDPIISTHLA
O00231_325	ALTDYRAELRDDPIISTHLAKLYDNLLEQNLIRVIEPFSRV
O00231_355	LIRVIEPFSRVQIEHISSLIKLSKADVERKLSQMILDKKFH
O00231_358	VIEPFSRVQIEHISSLIKLSKADVERKLSQMILDKKFHGIL
O00231_372	SLIKLSKADVERKLSQMILDKKFHGILDQGEGVLIIFDEPP
O00231_409	DEPPVDKTYEAALETIQNMSKVVDSLYNKAKKLTXXXXXXX
O00231_46	ILHSIVKRDIQENDEEAVQVKEQSILELGSLLAKTGQAAEL
O00231_71	LELGSLLAKTGQAAELGGLLKYVRPFLNSISKAKAARLVRS
O00232_121	VAKMVQQCCTYVEEITDLPIKLRLIDTLRMVTEGKIYVEIE
O00232_160	IERARLTKTLATIKEQNGDVKEAASILQELQVETYGSMEKK
O00232_197	MEKKERVEFILEQMRLCLAVKDYIRTQIISKKINTKFFQEE
O00232_223	QIISKKINTKFFQEENTEKLKLKYYNLMIQLDQHEGSYLSI
O00232_225	ISKKINTKFFQEENTEKLKLKYYNLMIQLDQHEGSYLSICK
O00232_245	KYYNLMIQLDQHEGSYLSICKHYRAIYDTPCIQAESEKWQQ
O00232_294	VILAPFDNEQSDLVHRISGDKKLEEIPKYKDLLKLFTTMEL
O00232_295	ILAPFDNEQSDLVHRISGDKKLEEIPKYKDLLKLFTTMELM
O00232_301	NEQSDLVHRISGDKKLEEIPKYKDLLKLFTTMELMRWSTLV
O00232_303	QSDLVHRISGDKKLEEIPKYKDLLKLFTTMELMRWSTLVED
O00232_352	SLESPATDVFGSTEEGEKRWKDLKNRVVEHNIRIMAKYYTR
O00232_355	SPATDVFGSTEEGEKRWKDLKNRVVEHNIRIMAKYYTRITM
O00232_368	EKRWKDLKNRVVEHNIRIMAKYYTRITMKRMAQLLDLSVDE
O00232_376	NRVVEHNIRIMAKYYTRITMKRMAQLLDLSVDESEAFLSNL
O00232_400	QLLDLSVDESEAFLSNLVVNKTIFAKVDRLAGIINFQRPKD
O00232_405	SVDESEAFLSNLVVNKTIFAKVDRLAGIINFQRPKDPNNLL
O00232_419	NKTIFAKVDRLAGIINFQRPKDPNNLLNDWSQKLNSLMSLV
O00232_72	KQTRTASDMVSTSRILVAVVKMCYEAKEWDLLNENIMLLSK
O00232_98	KEWDLLNENIMLLSKRRSQLKQAVAKMVQQCCTYVEEITDL
O00257_126	KLDLGAQGKGQGHQYELNSKKHHQYQPHSKERAGKPPPPGK
O00257_19	XXMELPAVGEHVFAVESIEKKRIRKGRVEYLVKWRGWSPKY
O00257_256	APKEAVTGNGIGGKMKIVKNKNKNGRIVIVMSKYMENGMQA
O00257_258	KEAVTGNGIGGKMKIVKNKNKNGRIVIVMSKYMENGMQAVK
O00257_31	FAVESIEKKRIRKGRVEYLVKWRGWSPKYNTWEPEENILDP
O00257_517	TPASAAVAVAAAAAPTTTAEKPPAEAQDEPAESLSEFKPFF
O00257_534	TAEKPPAEAQDEPAESLSEFKPFFGNIIITDVTANCLTVTF
O00257_555	PFFGNIIITDVTANCLTVTFKEYVTVXXXXXXXXXXXXXXX
O00257_75	IAFQNRERQEQLMGYRKRGPKPKPLVVQVPTFARRSNVLTG
O00267_1040	EKVVSISSEHLEPITPTKNNKVKVILGEDREATGVLLSIDG
O00267_1042	VVSISSEHLEPITPTKNNKVKVILGEDREATGVLLSIDGED
O00267_1083	GIVRMDLDEQLKILNLRFLGKLLEAXXXXXXXXXXXXXXXX
O00267_144	RLQNLWRDQREEELGEYYMKKYAKSSVGETVYGGSDELSDD
O00267_185	ITQQQLLPGVKDPNLWTVKCKIGEERATAISLMRKFIAYQF
O00267_222	AYQFTDTPLQIKSVVAPEHVKGYIYVEAYKQTHVKQAIEGV
O00267_236	VAPEHVKGYIYVEAYKQTHVKQAIEGVGNLRLGYWNQQMVP
O00267_258	AIEGVGNLRLGYWNQQMVPIKEMTDVLKVVKEVANLKPKSW
O00267_282	DVLKVVKEVANLKPKSWVRLKRGIYKDDIAQVDYVEPSQNT
O00267_287	VKEVANLKPKSWVRLKRGIYKDDIAQVDYVEPSQNTISLKM
O00267_317	EPSQNTISLKMIPRIDYDRIKARMSLKDWFAKRKKFKRPPQ
O00267_323	ISLKMIPRIDYDRIKARMSLKDWFAKRKKFKRPPQRLFDAE
O00267_330	RIDYDRIKARMSLKDWFAKRKKFKRPPQRLFDAEKIRSLGG
O00267_331	IDYDRIKARMSLKDWFAKRKKFKRPPQRLFDAEKIRSLGGD
O00267_333	YDRIKARMSLKDWFAKRKKFKRPPQRLFDAEKIRSLGGDVA
O00267_374	SDGDFLIFEGNRYSRKGFLFKSFAMSAVITEGVKPTLSELE
O00267_38	SSDGEEAEVDEERRSAAGSEKEEEPEDEEEEEEEEEYDEEE
O00267_387	SRKGFLFKSFAMSAVITEGVKPTLSELEKFEDQPEGIDLEV
O00267_439	NFQPGDNVEVCEGELINLQGKILSVDGNKITIMPKHEDLKD
O00267_458	GKILSVDGNKITIMPKHEDLKDMLEFPAQELRKYFKMGDHV
O00267_473	KHEDLKDMLEFPAQELRKYFKMGDHVKVIAGRFEGDTGLIV
O00267_512	IVRVEENFVILFSDLTMHELKVLPRDLQLCSETASGVDVGG
O00267_579	QVLNMYGKVVTVRHQAVTRKKDNRFAVALDSEQNNIHVKDI
O00267_597	RKKDNRFAVALDSEQNNIHVKDIVKVIDGPHSGREGEIRHL
O00267_601	NRFAVALDSEQNNIHVKDIVKVIDGPHSGREGEIRHLFRSF
O00267_627	HSGREGEIRHLFRSFAFLHCKKLVENGGMFVCKTRHLVLAG
O00267_650	VENGGMFVCKTRHLVLAGGSKPRDVTNFTVGGFAPMSPRIS
O00267_718	RGRRDNELIGQTVRISQGPYKGYIGVVKDATESTARVELHS
O00267_725	LIGQTVRISQGPYKGYIGVVKDATESTARVELHSTCQTISV
O00287_139	GGEGSSGGARRRGSGGGSMSKTCTYEGCSETTSQVAKQRKP
O00287_155	GSMSKTCTYEGCSETTSQVAKQRKPWMCKKHRNKMYKDKYK
O00287_158	SKTCTYEGCSETTSQVAKQRKPWMCKKHRNKMYKDKYKKKK
O00287_163	YEGCSETTSQVAKQRKPWMCKKHRNKMYKDKYKKKKSDQAL
O00287_164	EGCSETTSQVAKQRKPWMCKKHRNKMYKDKYKKKKSDQALN
O00287_168	ETTSQVAKQRKPWMCKKHRNKMYKDKYKKKKSDQALNCGGT
O00287_173	VAKQRKPWMCKKHRNKMYKDKYKKKKSDQALNCGGTASTGS
O00287_175	KQRKPWMCKKHRNKMYKDKYKKKKSDQALNCGGTASTGSAG
O00287_176	QRKPWMCKKHRNKMYKDKYKKKKSDQALNCGGTASTGSAGN
O00287_177	RKPWMCKKHRNKMYKDKYKKKKSDQALNCGGTASTGSAGNV
O00287_178	KPWMCKKHRNKMYKDKYKKKKSDQALNCGGTASTGSAGNVK
O00287_250	VLNQKRLSLLRSPEVVQFLQKQQQLLNQQVLEQRQQQFPGT
O00287_69	MQPCAGQDEAAAPGGSVGAGKPVRYLCEGAGDGEEEAGEDE
O00311_121	IAAELQCLTVAGGQDNVMGVKYCFRKNDHVVIAMPYLEHES
O00311_126	QCLTVAGGQDNVMGVKYCFRKNDHVVIAMPYLEHESFLDIL
O00311_190	QFGIVHRDVKPSNFLYNRRLKKYALVDFGLAQGTHDTKIEL
O00311_324	AVKLMKQSKTVDVLSRKLATKKKAISTKVMNSAVMRKTASS
O00311_387	RQQVAPRAGTPGFRAPEVLTKCPNQTTAIDMWSAGVIFLSL
O00311_460	AKTFGKSILCSKEVPAQDLRKLCERLRGMDSSTPKLTSDIQ
O00311_515	HKASCLVQTPPGQYSGNSFKKGDSNSCEHCFDEYNTNLEGW
O00311_548	YNTNLEGWNEVPDEAYDLLDKLLDLNPASRITAEEALLHPF
O00311_63	DIEKLYEAVPQLSNVFKIEDKIGEGTFSSVYLATAQLQVGP
O00422_24	ESRVTQEEIKKEPEKPIDREKTCPLLLRVFTTNNGRHHRMD
O00422_67	SRGNVPSSELQIYTWMDATLKELTSLVKEVYPEARKKGTHF
O00422_83	DATLKELTSLVKEVYPEARKKGTHFNFAIVFTDVKRPGYRV
O00422_97	YPEARKKGTHFNFAIVFTDVKRPGYRVKEIGSTMSGRKGTD
O00425_150	DQARQALDKLNGFQLENFTLKVAYIPDEMAAQQNPLQQPRG
O00425_213	PCDLPLRLLVPTQFVGAIIGKEGATIRNITKQTQSKIDVHR
O00425_223	PTQFVGAIIGKEGATIRNITKQTQSKIDVHRKENAGAAEKS
O00425_23	KLYIGNLSENAAPSDLESIFKDAKIPVSGPFLVKTGYAFVD
O00425_242	TKQTQSKIDVHRKENAGAAEKSITILSTPEGTSAACKSILE
O00425_280	ILEIMHKEAQDIKFTEEIPLKILAHNNFVGRLIGKEGRNLK
O00425_301	ILAHNNFVGRLIGKEGRNLKKIEQDTDTKITISPLQELTLY
O00425_346	TITVKGNVETCAKAEEEIMKKIRESYENDIASMNLQAHLIP
O00425_36	SDLESIFKDAKIPVSGPFLVKTGYAFVDCPDESWALKAIEA
O00425_429	HLFIPALSVGAIIGKQGQHIKQLSRFAGASIKIAPAEAPDA
O00425_465	EAPDAKVRMVIITGPPEAQFKAQGRIYGKIKEENFVSPKEE
O00425_473	MVIITGPPEAQFKAQGRIYGKIKEENFVSPKEEVKLEAHIR
O00425_552	NDQVVVKITGHFYACQVAQRKIQEILTQVKQHQQQKALQSG
O00425_561	GHFYACQVAQRKIQEILTQVKQHQQQKALQSGPPQSRRKXX
O00425_567	QVAQRKIQEILTQVKQHQQQKALQSGPPQSRRKXXXXXXXX
O00425_60	AFVDCPDESWALKAIEALSGKIELHGKPIEVEHSVPKRQRI
O00425_66	DESWALKAIEALSGKIELHGKPIEVEHSVPKRQRIRKLQIR
O00541_180	LCRRLTVEFMHYIIAARALRKVFLSIKGIYYQAEVLGQPIV
O00541_186	VEFMHYIIAARALRKVFLSIKGIYYQAEVLGQPIVWITPYA
O00541_22	GGLEKKKYERGSATNYITRNKARKKLQLSLADFRRLCILKG
O00541_322	TDGEMSAQEEDRRKELEAQEKHKKLFEGLKFFLNREVPREA
O00541_325	EMSAQEEDRRKELEAQEKHKKLFEGLKFFLNREVPREALAF
O00541_439	LPPHLSPFVTEKEGDYVPPEKLKLLALQRGEDPGNLNESEE
O00541_507	GSEKEEEARLAALEEQRMEGKKPRVMAGTLKLEDKQRLAQE
O00541_53	DFRRLCILKGIYPHEPKHKKKVNKGSTAARTFYLIKDIRFL
O00541_533	AGTLKLEDKQRLAQEEESEAKRLAIMMMKKREKYLYQKIMF
O00541_541	KQRLAQEEESEAKRLAIMMMKKREKYLYQKIMFGKRRKIRE
O00541_542	QRLAQEEESEAKRLAIMMMKKREKYLYQKIMFGKRRKIREA
O00541_550	SEAKRLAIMMMKKREKYLYQKIMFGKRRKIREANKLAEKRK
O00541_555	LAIMMMKKREKYLYQKIMFGKRRKIREANKLAEKRKAHDEA
O00541_56	RLCILKGIYPHEPKHKKKVNKGSTAARTFYLIKDIRFLLHE
O00541_570	KIMFGKRRKIREANKLAEKRKAHDEAVRSEKKAKKARPEXX
O00541_580	REANKLAEKRKAHDEAVRSEKKAKKARPEXXXXXXXXXXXX
O00541_581	EANKLAEKRKAHDEAVRSEKKAKKARPEXXXXXXXXXXXXX
O00541_583	NKLAEKRKAHDEAVRSEKKAKKARPEXXXXXXXXXXXXXXX
O00541_68	PKHKKKVNKGSTAARTFYLIKDIRFLLHEPIVNKFREYKVF
O00541_81	ARTFYLIKDIRFLLHEPIVNKFREYKVFVRKLRKAYGKSEW
O00541_86	LIKDIRFLLHEPIVNKFREYKVFVRKLRKAYGKSEWNTVER
O00541_94	LHEPIVNKFREYKVFVRKLRKAYGKSEWNTVERLKDNKPNY
O00566_162	GNDDPEMGERAENSSKSDLRKSPVFSDEDSDLDFDISKLEQ
O00566_189	EDSDLDFDISKLEQQSKVQNKGQGKPREKSIVDDKFFKLSE
O00566_197	ISKLEQQSKVQNKGQGKPREKSIVDDKFFKLSEMEAYLENI
O00566_206	VQNKGQGKPREKSIVDDKFFKLSEMEAYLENIEKEEERKDD
O00566_259	DIDSDEDEGGLFGSKKLKSGKSSRNLKYKDFFDPVESDEDI
O00566_267	GGLFGSKKLKSGKSSRNLKYKDFFDPVESDEDITNVHDDEL
O00566_291	DPVESDEDITNVHDDELDSNKEDDEIAEEEAEELSISETDE
O00566_322	EELSISETDEDDDLQENEDNKQHKESLKRVTFALPDDAETE
O00566_325	SISETDEDDDLQENEDNKQHKESLKRVTFALPDDAETEDTG
O00566_329	TDEDDDLQENEDNKQHKESLKRVTFALPDDAETEDTGVLNV
O00566_351	VTFALPDDAETEDTGVLNVKKNSDEVKSSFEKRQEKMNEKI
O00566_357	DDAETEDTGVLNVKKNSDEVKSSFEKRQEKMNEKIASLEKE
O00566_366	VLNVKKNSDEVKSSFEKRQEKMNEKIASLEKELLEKKPWQL
O00566_376	VKSSFEKRQEKMNEKIASLEKELLEKKPWQLQGEVTAQKRP
O00566_444	QLEDIIKQRIRDQAWDDVVRKEKPKEDAYEYKKRLTLDHEK
O00566_448	IIKQRIRDQAWDDVVRKEKPKEDAYEYKKRLTLDHEKSKLS
O00566_456	QAWDDVVRKEKPKEDAYEYKKRLTLDHEKSKLSLAEIYEQE
O00566_498	IKLNQQKTAEEENPEHVEIQKMMDSLFLKLDALSNFHFIPK
O00566_557	EVAPVSVSDAALLAPEEIKEKNKAGDIKTAAEKTATDKKRE
O00566_559	APVSVSDAALLAPEEIKEKNKAGDIKTAAEKTATDKKRERR
O00566_575	KEKNKAGDIKTAAEKTATDKKRERRKKKYQKRMKIKEKEKR
O00566_580	AGDIKTAAEKTATDKKRERRKKKYQKRMKIKEKEKRRKLLE
O00566_581	GDIKTAAEKTATDKKRERRKKKYQKRMKIKEKEKRRKLLEK
O00566_582	DIKTAAEKTATDKKRERRKKKYQKRMKIKEKEKRRKLLEKS
O00566_585	TAAEKTATDKKRERRKKKYQKRMKIKEKEKRRKLLEKSSVD
O00566_588	EKTATDKKRERRKKKYQKRMKIKEKEKRRKLLEKSSVDQAG
O00566_590	TATDKKRERRKKKYQKRMKIKEKEKRRKLLEKSSVDQAGKY
O00566_592	TDKKRERRKKKYQKRMKIKEKEKRRKLLEKSSVDQAGKYSK
O00566_597	ERRKKKYQKRMKIKEKEKRRKLLEKSSVDQAGKYSKTVASE
O00566_601	KKYQKRMKIKEKEKRRKLLEKSSVDQAGKYSKTVASEKLKQ
O00566_612	KEKRRKLLEKSSVDQAGKYSKTVASEKLKQLTKTGKASFIK
O00566_624	VDQAGKYSKTVASEKLKQLTKTGKASFIKDEGKDKALKSSQ
O00566_638	KLKQLTKTGKASFIKDEGKDKALKSSQAFFSKLQDQVKMQI
O00566_65	VLYDFNKILENGRIHGSPLQKLVIENFDDEQIWQQLELQNE
O00566_663	SQAFFSKLQDQVKMQINDAKKTEKKKKKRQDISVHKLKLXX
O00566_666	FFSKLQDQVKMQINDAKKTEKKKKKRQDISVHKLKLXXXXX
O00566_667	FSKLQDQVKMQINDAKKTEKKKKKRQDISVHKLKLXXXXXX
O00566_670	LQDQVKMQINDAKKTEKKKKKRQDISVHKLKLXXXXXXXXX
O00567_156	LTDLSACKAQLGLGHSYSRAKVKFNVNRVDNMIIQSISLLD
O00567_288	SSRVVSLSEYRQSLHTYLRSKMSQVAPSLSALIGEAVGARL
O00567_320	IGEAVGARLIAHAGSLTNLAKYPASTVQILGAEKALFRALK
O00567_41	EVEEISLLQPQVEESVLNLGKFHSIVRLVAFCPFASSQVAL
O00567_444	AMVQAEEAAAEITRKLEKQEKKRLKKEKKRLAALALASSEN
O00567_445	MVQAEEAAAEITRKLEKQEKKRLKKEKKRLAALALASSENS
O00567_448	AEEAAAEITRKLEKQEKKRLKKEKKRLAALALASSENSSST
O00567_449	EEAAAEITRKLEKQEKKRLKKEKKRLAALALASSENSSSTP
O00567_451	AAAEITRKLEKQEKKRLKKEKKRLAALALASSENSSSTPEE
O00567_481	SSENSSSTPEECEEMSEKPKKKKKQKPQEVPQENGMEDPSI
O00567_483	ENSSSTPEECEEMSEKPKKKKKQKPQEVPQENGMEDPSISF
O00567_484	NSSSTPEECEEMSEKPKKKKKQKPQEVPQENGMEDPSISFS
O00567_507	PQEVPQENGMEDPSISFSKPKKKKSFSKEELMSSDLEETAG
O00567_509	EVPQENGMEDPSISFSKPKKKKSFSKEELMSSDLEETAGST
O00567_533	SKEELMSSDLEETAGSTSIPKRKKSTPKEETVNDPEEAGHR
O00567_535	EELMSSDLEETAGSTSIPKRKKSTPKEETVNDPEEAGHRSG
O00567_536	ELMSSDLEETAGSTSIPKRKKSTPKEETVNDPEEAGHRSGS
O00567_558	TPKEETVNDPEEAGHRSGSKKKRKFSKEEPVSSGPEEAVGK
O00567_561	EETVNDPEEAGHRSGSKKKRKFSKEEPVSSGPEEAVGKSSS
O00567_578	KKRKFSKEEPVSSGPEEAVGKSSSKKKKKFHKASQEDXXXX
O00567_585	EEPVSSGPEEAVGKSSSKKKKKFHKASQEDXXXXXXXXXXX
O00567_88	SEGVVHEDLRLLLETHLPSKKKKVLLGVGDPKIGAAIQEEL
O00567_89	EGVVHEDLRLLLETHLPSKKKKVLLGVGDPKIGAAIQEELG
O00567_99	LLETHLPSKKKKVLLGVGDPKIGAAIQEELGYNCQTGGVIA
O00571_130	RGDRSGFGKFERGGNSRWCDKSDEDDWSKPLPPSERLEQEL
O00571_208	GEIIMGNIELTRYTRPTPVQKHAIPIIKEKRDLMACAQTGS
O00571_230	AIPIIKEKRDLMACAQTGSGKTAAFLLPILSQIYSDGPGEA
O00571_255	LLPILSQIYSDGPGEALRAMKENGRYGRRKQYPISLVLAPT
O00571_264	SDGPGEALRAMKENGRYGRRKQYPISLVLAPTRELAVQIYE
O00571_335	RGCHLLVATPGRLVDMMERGKIGLDFCKYLVLDEADRMLDM
O00571_342	ATPGRLVDMMERGKIGLDFCKYLVLDEADRMLDMGFEPQIR
O00571_35	QFAGLDLNSSDNQSGGSTASKGRYIPPHLRNREATKGFYDK
O00571_373	LDMGFEPQIRRIVEQDTMPPKGVRHTMMFSATFPKEIQMLA
O00571_387	QDTMPPKGVRHTMMFSATFPKEIQMLARDFLDEYIFLAVGR
O00571_418	DEYIFLAVGRVGSTSENITQKVVWVEESDKRSFLLDLLNAT
O00571_427	RVGSTSENITQKVVWVEESDKRSFLLDLLNATGKDSLTLVF
O00571_440	VWVEESDKRSFLLDLLNATGKDSLTLVFVETKKGADSLEDF
O00571_452	LDLLNATGKDSLTLVFVETKKGADSLEDFLYHEGYACTSIH
O00571_50	GSTASKGRYIPPHLRNREATKGFYDKDSSGWSSSKDKDAYS
O00571_55	KGRYIPPHLRNREATKGFYDKDSSGWSSSKDKDAYSSFGSR
O00571_554	RVGNLGLATSFFNERNINITKDLLDLLVEAKQEVPSWLENM
O00571_581	VEAKQEVPSWLENMAYEHHYKGSSRGRSKSSRFSGGFGARD
O00571_589	SWLENMAYEHHYKGSSRGRSKSSRFSGGFGARDYRQSSGAS
O00571_64	RNREATKGFYDKDSSGWSSSKDKDAYSSFGSRSDSRGKSSF
O00571_66	REATKGFYDKDSSGWSSSKDKDAYSSFGSRSDSRGKSSFFS
O14503_102	HLKLTTLGHLEKAVVLELTLKHVKALTNLIDQQQQKIIALQ
O14503_190	QLVTHLHRVVSELLQGGTSRKPSDPAPKVMDFKEKPSSPAK
O14503_251	SGEQSGSDTDTDSGYGGESEKGDLRSEQPCFKSDHGRRFTM
O14503_289	FTMGERIGAIKQESEEPPTKKNRMQLSDDEGHFTSSDLISS
O14503_341	FCLPFYLIPPSATAYLPMLEKCWYPTSVPVLYPGLNASAAA
O14503_370	VLYPGLNASAAALSSFMNPDKISAPLLMPQRLPSPLPAHPS
O14503_411	VDSSVLLQALKPIPPLNLETKDXXXXXXXXXXXXXXXXXXX
O14503_62	GIKRSEDSKETYKLPHRLIEKKRRDRINECIAQLKDLLPEH
O14503_93	AQLKDLLPEHLKLTTLGHLEKAVVLELTLKHVKALTNLIDQ
O14628_122	SAGITGVNHRAQPGLNVSVDKFTALCSPGVLQTVKWFLEFR
O14628_136	LNVSVDKFTALCSPGVLQTVKWFLEFRCIFSLAMSSHFTQD
O14628_19	XXMTLLTFRDVAIEFSLEEWKCLDLAQQNLYRDVMLENYRN
O14628_199	GLDNLYLRKDWESLDECKLQKDYNGLNQCSSTTHSKIFQYN
O14628_214	ECKLQKDYNGLNQCSSTTHSKIFQYNKYVKIFDNFSNLHRR
O14628_220	DYNGLNQCSSTTHSKIFQYNKYVKIFDNFSNLHRRNISNTG
O14628_352	FGKVFNQCSHLTEHEHGTEEKPCKYEECSSVFISCSSLSNQ
O14628_355	VFNQCSHLTEHEHGTEEKPCKYEECSSVFISCSSLSNQQMI
O14628_389	LSNQQMILAGEKLSKCETWYKGFNHSPNPSKHQRNEIGGKP
O14628_49	YRDVMLENYRNLFSVGLTVCKPGLITCLEQRKEPWNVKRQE
O14639_101	FVAHPQDPHHPSEKPVIHCHKCGEPCKGEVLRVQTKHFHIK
O14639_116	VIHCHKCGEPCKGEVLRVQTKHFHIKCFTCKVCGCDLAQGG
O14639_140	IKCFTCKVCGCDLAQGGFFIKNGEYLCTLDYQRMYGTRCHG
O14639_18	XXXMPAFLGLKCLGKLCSSEKSKVTSSERTSARGSNRKRLI
O14639_20	XMPAFLGLKCLGKLCSSEKSKVTSSERTSARGSNRKRLIVE
O14639_234	SSSPKETTFSSNCAGCGRDIKNGQALLALDKQWHLGCFKCK
O14639_244	SNCAGCGRDIKNGQALLALDKQWHLGCFKCKSCGKVLTGEY
O14639_258	ALLALDKQWHLGCFKCKSCGKVLTGEYISKDGAPYCEKDYQ
O14639_267	HLGCFKCKSCGKVLTGEYISKDGAPYCEKDYQGLFGVKCEA
O14639_275	SCGKVLTGEYISKDGAPYCEKDYQGLFGVKCEACHQFITGK
O14639_284	YISKDGAPYCEKDYQGLFGVKCEACHQFITGKVLEAGDKHY
O14639_337	MFTEGEEMYLQGSTVWHPDCKQSTKTEEKLRPTRTSSESIY
O14639_341	GEEMYLQGSTVWHPDCKQSTKTEEKLRPTRTSSESIYSRPG
O14639_345	YLQGSTVWHPDCKQSTKTEEKLRPTRTSSESIYSRPGSSIP
O14639_375	SIYSRPGSSIPGSPGHTIYAKVDNEILDYKDLAAIPKVKAI
O14639_384	IPGSPGHTIYAKVDNEILDYKDLAAIPKVKAIYDIERPDLI
O14639_393	YAKVDNEILDYKDLAAIPKVKAIYDIERPDLITYEPFYTSG
O14639_417	DIERPDLITYEPFYTSGYDDKQERQSLGESPRTLSPTPSAE
O14639_510	SPLPYRPDSRPLTPTYAQAPKHFHVPDQGINIYRKPPIYKQ
O14639_529	PKHFHVPDQGINIYRKPPIYKQHAALAAQSKSSEDIIKFSK
O14639_546	PIYKQHAALAAQSKSSEDIIKFSKFPAAQAPDPSETPKIET
O14639_549	KQHAALAAQSKSSEDIIKFSKFPAAQAPDPSETPKIETDHW
O14639_609	REEDDEELLRRRQLQEEQLMKLNSGLGQLILKEEMEKESRE
O14639_625	EQLMKLNSGLGQLILKEEMEKESRERSSLLASRYDSPINSA
O14639_714	GHMPAMRMDRGVSMPNMLEPKIFPYEMLMVTNRGRNKILRE
O14639_730	MLEPKIFPYEMLMVTNRGRNKILREVDRTRLERHLAPEVFR
O14776_1011	IKFSSSDRKKQREFEEYIRDKYITAKADFRTLLKETKFITY
O14776_1024	FEEYIRDKYITAKADFRTLLKETKFITYRSKKLIQESDQHL
O14776_1027	YIRDKYITAKADFRTLLKETKFITYRSKKLIQESDQHLKDV
O14776_1034	TAKADFRTLLKETKFITYRSKKLIQESDQHLKDVEKILQND
O14776_1035	AKADFRTLLKETKFITYRSKKLIQESDQHLKDVEKILQNDK
O14776_1049	ITYRSKKLIQESDQHLKDVEKILQNDKRYLVLDCVPEERRK
O14776_1055	KLIQESDQHLKDVEKILQNDKRYLVLDCVPEERRKLIVAYV
O14776_1069	KILQNDKRYLVLDCVPEERRKLIVAYVDDLDRRGPPPPPTA
O14776_141	PVTAPGTPALPPTEEIWVENKTPDGKVYYYNARTRESAWTK
O14776_146	GTPALPPTEEIWVENKTPDGKVYYYNARTRESAWTKPDGVK
O14776_161	KTPDGKVYYYNARTRESAWTKPDGVKVIQQSELTPMLAAQA
O14776_392	GMPIPLPGVAMMQIVSCPYVKTVATTKTGVLPGMAPPIVPM
O14776_466	YYYNNRTLESTWEKPQELKEKEKLEEKIKEPIKEPSEEPLP
O14776_468	YNNRTLESTWEKPQELKEKEKLEEKIKEPIKEPSEEPLPME
O14776_472	TLESTWEKPQELKEKEKLEEKIKEPIKEPSEEPLPMETEEE
O14776_478	EKPQELKEKEKLEEKIKEPIKEPSEEPLPMETEEEDPKEEP
O14776_495	EPIKEPSEEPLPMETEEEDPKEEPIKEIKEEPKEEEMTEEE
O14776_579	PDDLIGRADVDKIIQEPPHKKGMEELKKLRHPTPTMLSIQK
O14776_585	RADVDKIIQEPPHKKGMEELKKLRHPTPTMLSIQKWQFSMS
O14776_599	KGMEELKKLRHPTPTMLSIQKWQFSMSAIKEEQELMEEINE
O14776_624	MSAIKEEQELMEEINEDEPVKAKKRKRDDNKDIDSEKEAAM
O14776_626	AIKEEQELMEEINEDEPVKAKKRKRDDNKDIDSEKEAAMEA
O14776_634	MEEINEDEPVKAKKRKRDDNKDIDSEKEAAMEAEIKAARER
O14776_667	EIKAARERAIVPLEARMKQFKDMLLERGVSAFSTWEKELHK
O14776_683	MKQFKDMLLERGVSAFSTWEKELHKIVFDPRYLLLNPKERK
O14776_700	TWEKELHKIVFDPRYLLLNPKERKQVFDQYVKTRAEEERRE
O14776_703	KELHKIVFDPRYLLLNPKERKQVFDQYVKTRAEEERREKKN
O14776_721	ERKQVFDQYVKTRAEEERREKKNKIMQAKEDFKKMMEEAKF
O14776_722	RKQVFDQYVKTRAEEERREKKNKIMQAKEDFKKMMEEAKFN
O14776_733	RAEEERREKKNKIMQAKEDFKKMMEEAKFNPRATFSEFAAK
O14776_734	AEEERREKKNKIMQAKEDFKKMMEEAKFNPRATFSEFAAKH
O14776_740	EKKNKIMQAKEDFKKMMEEAKFNPRATFSEFAAKHAKDSRF
O14776_756	MEEAKFNPRATFSEFAAKHAKDSRFKAIEKMKDREALFNEF
O14776_767	FSEFAAKHAKDSRFKAIEKMKDREALFNEFVAAARKKEKED
O14776_782	AIEKMKDREALFNEFVAAARKKEKEDSKTRGEKIKSDFFEL
O14776_785	KMKDREALFNEFVAAARKKEKEDSKTRGEKIKSDFFELLSN
O14776_789	REALFNEFVAAARKKEKEDSKTRGEKIKSDFFELLSNHHLD
O14776_818	DFFELLSNHHLDSQSRWSKVKDKVESDPRYKAVDSSSMRED
O14776_820	FELLSNHHLDSQSRWSKVKDKVESDPRYKAVDSSSMREDLF
O14776_846	RYKAVDSSSMREDLFKQYIEKIAKNLDSEKEKELERQARIE
O14776_849	AVDSSSMREDLFKQYIEKIAKNLDSEKEKELERQARIEASL
O14776_855	MREDLFKQYIEKIAKNLDSEKEKELERQARIEASLRERERE
O14776_857	EDLFKQYIEKIAKNLDSEKEKELERQARIEASLREREREVQ
O14776_885	IEASLREREREVQKARSEQTKEIDREREQHKREEAIQNFKA
O14776_895	EVQKARSEQTKEIDREREQHKREEAIQNFKALLSDMVRSSD
O14776_904	TKEIDREREQHKREEAIQNFKALLSDMVRSSDVSWSDTRRT
O14776_927	LSDMVRSSDVSWSDTRRTLRKDHRWESGSLLEREEKEKLFN
O14776_942	RRTLRKDHRWESGSLLEREEKEKLFNEHIEALTKKKREHFR
O14776_944	TLRKDHRWESGSLLEREEKEKLFNEHIEALTKKKREHFRQL
O14776_956	LLEREEKEKLFNEHIEALTKKKREHFRQLLDETSAITLTST
O14776_957	LEREEKEKLFNEHIEALTKKKREHFRQLLDETSAITLTSTW
O14776_985	LDETSAITLTSTWKEVKKIIKEDPRCIKFSSSDRKKQREFE
O14776_992	TLTSTWKEVKKIIKEDPRCIKFSSSDRKKQREFEEYIRDKY
O14924_1011	LCERHGINGAAADLFLVGGDKPLVLHQDSSILESRDLRLEK
O14924_1031	KPLVLHQDSSILESRDLRLEKRTLFRLDLVPINRSVGLKAK
O14924_1051	KRTLFRLDLVPINRSVGLKAKPTKPVTEVLRPVVARYGLDL
O14924_1082	PVVARYGLDLSGLLVRLSGEKEPLDLGAPISSLDGQRVVLE
O14924_1104	PLDLGAPISSLDGQRVVLEEKDPSRGKASADKQKGVPVKQN
O14924_1110	PISSLDGQRVVLEEKDPSRGKASADKQKGVPVKQNTAVNSS
O14924_1117	QRVVLEEKDPSRGKASADKQKGVPVKQNTAVNSSSRNHSAT
O14924_1122	EEKDPSRGKASADKQKGVPVKQNTAVNSSSRNHSATGEERT
O14924_1145	TAVNSSSRNHSATGEERTLGKSNSIKIKGENGKNARDPRLS
O14924_1150	SSRNHSATGEERTLGKSNSIKIKGENGKNARDPRLSKREES
O14924_117	EGVGRFESCSSDEEGGLYEGKGWLKPKLDSKALGINRAERV
O14924_1173	GENGKNARDPRLSKREESIAKIGKKKYQKINLDEAEEFFEL
O14924_1178	NARDPRLSKREESIAKIGKKKYQKINLDEAEEFFELISKAQ
O14924_1181	DPRLSKREESIAKIGKKKYQKINLDEAEEFFELISKAQSNR
O14924_1196	KKKYQKINLDEAEEFFELISKAQSNRADDQRGLLRKEDLVL
O14924_121	RFESCSSDEEGGLYEGKGWLKPKLDSKALGINRAERVVEEM
O14924_123	ESCSSDEEGGLYEGKGWLKPKLDSKALGINRAERVVEEMQS
O14924_1239	FLRLPPGSTELTLPTPAAVAKGFSKRSATGNGRESASQPGE
O14924_127	SDEEGGLYEGKGWLKPKLDSKALGINRAERVVEEMQSGGIF
O14924_1436	SGGPPTSDLPGLGPVPGEPAKPKTSAHHATFVXXXXXXXXX
O14924_1438	GPPTSDLPGLGPVPGEPAKPKTSAHHATFVXXXXXXXXXXX
O14924_201	VGHESINNPNPNMLSKEEISKVIHDDSVFSIGLESHDDFAL
O14924_275	IRGCMRRLRAEQKIHSLVTMKIMHDCVQLSTDKAGVVAEYP
O14924_287	KIHSLVTMKIMHDCVQLSTDKAGVVAEYPAEKLAFSAVCPD
O14924_298	HDCVQLSTDKAGVVAEYPAEKLAFSAVCPDDRRFFGLVTMQ
O14924_350	EGALRTSCHVFMVDPDLFNHKIHQGIARRFGFECTADPDTN
O14924_434	QNNSTSSNSDSGIGNFHQEEKSNRVLVVDLGGSSSRHGPGG
O14924_500	PEGSPPFEAAHQTDRFWDLNKHLGPASPVEVPPASLRSSVP
O14924_578	TDSTDGWSSINCGTLPPPMSKIPADRYRVEGSFAQPPLNAP
O14924_605	RVEGSFAQPPLNAPKREWSRKAFGMQSIFGPHRNVRKTKED
O14924_623	SRKAFGMQSIFGPHRNVRKTKEDKKGSKFGRGTGLTQPSQR
O14924_681	SLDDLESATVSDGELTGADLKDCVSNNSLSSNASLPSVQSC
O14924_73	ADFVGLRAGDQILAVNEINVKKASHEDVVKLIGKCSGVLHM
O14924_74	DFVGLRAGDQILAVNEINVKKASHEDVVKLIGKCSGVLHMV
O14924_760	ENILFWQACEYFNHVPAHDKKELSYRAREIFSKFLCSKATT
O14924_772	NHVPAHDKKELSYRAREIFSKFLCSKATTPVNIDSQAQLAD
O14924_777	HDKKELSYRAREIFSKFLCSKATTPVNIDSQAQLADDVLRA
O14924_804	IDSQAQLADDVLRAPHPDMFKEQQLQIFNLMKFDSYTRFLK
O14924_815	LRAPHPDMFKEQQLQIFNLMKFDSYTRFLKSPLYQECILAE
O14924_82	DQILAVNEINVKKASHEDVVKLIGKCSGVLHMVIAEGVGRF
O14924_824	KEQQLQIFNLMKFDSYTRFLKSPLYQECILAEVEGRALPDS
O14924_854	AEVEGRALPDSQQVPSSPASKHSLGSDHSSVSTPKKLSGKS
O14924_86	AVNEINVKKASHEDVVKLIGKCSGVLHMVIAEGVGRFESCS
O14924_868	PSSPASKHSLGSDHSSVSTPKKLSGKSKSGRSLNEELGDED
O14924_875	HSLGSDHSSVSTPKKLSGKSKSGRSLNEELGDEDSEKKRKG
O14924_911	KKRKGAFFSWSRTRSTGRSQKKREHGDHADDALHANGGLCR
O14924_912	KRKGAFFSWSRTRSTGRSQKKREHGDHADDALHANGGLCRR
O14924_957	SVSSAGSLDLSEACRTLAPEKDKATKHCCIHLPDGTSCVVA
O14924_962	GSLDLSEACRTLAPEKDKATKHCCIHLPDGTSCVVAVKAGF
O14924_979	KATKHCCIHLPDGTSCVVAVKAGFSIKDILSGLCERHGING
O14924_985	CIHLPDGTSCVVAVKAGFSIKDILSGLCERHGINGAAADLF
O14965_141	EESKKRQWALEDFEIGRPLGKGKFGNVYLAREKQSKFILAL
O14965_143	SKKRQWALEDFEIGRPLGKGKFGNVYLAREKQSKFILALKV
O14965_156	GRPLGKGKFGNVYLAREKQSKFILALKVLFKAQLEKAGVEH
O14965_162	GKFGNVYLAREKQSKFILALKVLFKAQLEKAGVEHQLRREV
O14965_166	NVYLAREKQSKFILALKVLFKAQLEKAGVEHQLRREVEIQS
O14965_309	LCGTLDYLPPEMIEGRMHDEKVDLWSLGVLCYEFLVGKPPF
O14965_365	EFTFPDFVTEGARDLISRLLKHNPSQRPMLREVLEHPWITA
O14965_401	PWITANSSKPSNCQNKESASKQSXXXXXXXXXXXXXXXXXX
O14965_97	KQLQATSVPHPVSRPLNNTQKSKQPLPSAPENNPEEELASK
O14978_208	ERALSAPWLSLFPPEGNMEDKEMTGPQLPESLEDVAMYISQ
O14978_375	QALAGASSGRELGRPKELQPKKLHLCPLCGKNFSNNSNLIR
O14979_137	SVTMEDMNEYSNIEEFAEGSKINASKNQQDDGKMFIGGLSW
O14979_142	DMNEYSNIEEFAEGSKINASKNQQDDGKMFIGGLSWDTSKK
O14979_149	IEEFAEGSKINASKNQQDDGKMFIGGLSWDTSKKDLTEYLS
O14979_162	KNQQDDGKMFIGGLSWDTSKKDLTEYLSRFGEVVDCTIKTD
O14979_212	GFVLFKDAASVDKVLELKEHKLDGKLIDPKRAKALKGKEPP
O14979_216	FKDAASVDKVLELKEHKLDGKLIDPKRAKALKGKEPPKKVF
O14979_224	KVLELKEHKLDGKLIDPKRAKALKGKEPPKKVFVGGLSPDT
O14979_227	ELKEHKLDGKLIDPKRAKALKGKEPPKKVFVGGLSPDTSEE
O14979_233	LDGKLIDPKRAKALKGKEPPKKVFVGGLSPDTSEEQIKEYF
O14979_234	DGKLIDPKRAKALKGKEPPKKVFVGGLSPDTSEEQIKEYFG
O14979_269	IKEYFGAFGEIENIELPMDTKTNERRGFCFITYTDEEPVKK
O14979_302	TDEEPVKKLLESRYHQIGSGKCEIKVAQPKEVYRQQQQQQK
O14979_306	PVKKLLESRYHQIGSGKCEIKVAQPKEVYRQQQQQQKGGRG
O14979_311	LESRYHQIGSGKCEIKVAQPKEVYRQQQQQQKGGRGAAAGG
O14979_322	KCEIKVAQPKEVYRQQQQQQKGGRGAAAGGRGGTRGRGRGQ
O14979_405	GNYGYGQGYADYSGQQSTYGKASRGGGNHQNNYQPYXXXXX
O14979_91	GGAAIKGGRRRRPDLFRRHFKSSSIQRSAAAAAATRTARQH
O15014_1010	YHTHLLSTNTAYRQQYEEQQKRQSLEQQQRGVDKKAEMGLK
O15014_1030	KRQSLEQQQRGVDKKAEMGLKEREAALKEEWKQKPSIPPTL
O15014_1041	VDKKAEMGLKEREAALKEEWKQKPSIPPTLTKAPSLTDLVK
O15014_1043	KKAEMGLKEREAALKEEWKQKPSIPPTLTKAPSLTDLVKSG
O15014_1066	IPPTLTKAPSLTDLVKSGPGKAKEPGADPAKSVIIPKLDDS
O15014_1166	PAKYSDIKSEDERWKEERDRKLKEERSRSKDSVPKEDGKES
O15014_1168	KYSDIKSEDERWKEERDRKLKEERSRSKDSVPKEDGKESTS
O15014_119	TSKPTPGTSLFTPSEGAASKKEVQGRSGDGANAGGLVAAIA
O15014_1192	SRSKDSVPKEDGKESTSSDCKLPTSEESRLGSKEPRPSVHV
O15014_1204	KESTSSDCKLPTSEESRLGSKEPRPSVHVPVSSPLTQHQSY
O15014_1281	PSSYSFSPYGSKVSGGEDADKARASPSVTCKSSSESKALDI
O15014_1310	CKSSSESKALDILQQHASHYKSKSPTISDKTSQERDRGGCG
O15014_1319	LDILQQHASHYKSKSPTISDKTSQERDRGGCGVVGGGGSCS
O15014_141	VQGRSGDGANAGGLVAAIAPKGSEKAAKASRSVAGSKKEKE
O15014_145	SGDGANAGGLVAAIAPKGSEKAAKASRSVAGSKKEKENSSS
O15014_148	GANAGGLVAAIAPKGSEKAAKASRSVAGSKKEKENSSSKSK
O15014_157	AIAPKGSEKAAKASRSVAGSKKEKENSSSKSKKERSEGVGT
O15014_158	IAPKGSEKAAKASRSVAGSKKEKENSSSKSKKERSEGVGTC
O15014_160	PKGSEKAAKASRSVAGSKKEKENSSSKSKKERSEGVGTCSE
O15014_169	ASRSVAGSKKEKENSSSKSKKERSEGVGTCSEKDPGVLQPV
O15014_181	ENSSSKSKKERSEGVGTCSEKDPGVLQPVPLGGRGGQYDGS
O15014_243	LNPLGTKPEPEEGENECRLLKKVKSEKMESPVSTPAVLPIH
O15014_244	NPLGTKPEPEEGENECRLLKKVKSEKMESPVSTPAVLPIHL
O15014_246	LGTKPEPEEGENECRLLKKVKSEKMESPVSTPAVLPIHLLV
O15014_336	GIVWQETEDGMLVVNVTWRNKTYVGTLLDCTRHDWAPPRFC
O15014_373	PRFCDSPTSDLEMRNGRGRGKRMRPNSNTPVNETATASDSK
O15014_408	TASDSKGTSNSSKTRAGANSKGRRGSQNSSEHRPPASSTSE
O15014_439	HRPPASSTSEDVKASPSSANKRKNKPLSDMELNSSSEDSKG
O15014_443	ASSTSEDVKASPSSANKRKNKPLSDMELNSSSEDSKGSKRV
O15014_458	NKRKNKPLSDMELNSSSEDSKGSKRVRTNSMGSATGPLPGT
O15014_461	KNKPLSDMELNSSSEDSKGSKRVRTNSMGSATGPLPGTKVE
O15014_48	DIGVGNLIIDLDADLEKDQQKLEMSGSKEVGIPAPNAVATL
O15014_504	VLDRNCPSPVLIDCPHPNCNKKYKHINGLKYHQAHAHTDDD
O15014_526	YKHINGLKYHQAHAHTDDDSKPEADGDSEYGEEPILHADLG
O15014_55	IIDLDADLEKDQQKLEMSGSKEVGIPAPNAVATLPDNIKFV
O15014_556	GEEPILHADLGSCNGASVSQKGSLSPARSATPKVRLVEPHS
O15014_582	ARSATPKVRLVEPHSPSPSSKFSTKGLCKKKLSGEGDTDLG
O15014_586	TPKVRLVEPHSPSPSSKFSTKGLCKKKLSGEGDTDLGALSN
O15014_592	VEPHSPSPSSKFSTKGLCKKKLSGEGDTDLGALSNDGSDDG
O15014_630	DDGPSVMDETSNDAFDSLERKCMEKEKCKKPSSLKPEKIPS
O15014_634	SVMDETSNDAFDSLERKCMEKEKCKKPSSLKPEKIPSKSLK
O15014_639	TSNDAFDSLERKCMEKEKCKKPSSLKPEKIPSKSLKSARPI
O15014_644	FDSLERKCMEKEKCKKPSSLKPEKIPSKSLKSARPIAPAIP
O15014_651	CMEKEKCKKPSSLKPEKIPSKSLKSARPIAPAIPPQQIYTF
O15014_654	KEKCKKPSSLKPEKIPSKSLKSARPIAPAIPPQQIYTFQTA
O15014_73	GSKEVGIPAPNAVATLPDNIKFVTPVPGPQGKEGKSKSKRS
O15014_732	GEPFTVNPALTPAKDKKKKDKKKKESSKELESPLTPGKVCR
O15014_733	EPFTVNPALTPAKDKKKKDKKKKESSKELESPLTPGKVCRA
O15014_734	PFTVNPALTPAKDKKKKDKKKKESSKELESPLTPGKVCRAE
O15014_735	FTVNPALTPAKDKKKKDKKKKESSKELESPLTPGKVCRAEE
O15014_749	KKDKKKKESSKELESPLTPGKVCRAEEGKSPFRESSGDGMK
O15014_757	SSKELESPLTPGKVCRAEEGKSPFRESSGDGMKMEGLLNGS
O15014_794	LNGSSDPHQSRLASIKAEADKIYSFTDNAPSPSIGGSSRLE
O15014_839	TQPLTPLHVVTQNGAEASSVKTNSPAYSDISDAGEDGEGKV
O15014_84	AVATLPDNIKFVTPVPGPQGKEGKSKSKRSKSGKDTSKPTP
O15014_858	VKTNSPAYSDISDAGEDGEGKVDSVKSKDAEQLVKEGAKKT
O15014_863	PAYSDISDAGEDGEGKVDSVKSKDAEQLVKEGAKKTLFPPQ
O15014_87	TLPDNIKFVTPVPGPQGKEGKSKSKRSKSGKDTSKPTPGTS
O15014_872	GEDGEGKVDSVKSKDAEQLVKEGAKKTLFPPQPQSKDSPYY
O15014_876	EGKVDSVKSKDAEQLVKEGAKKTLFPPQPQSKDSPYYQGFE
O15014_877	GKVDSVKSKDAEQLVKEGAKKTLFPPQPQSKDSPYYQGFES
O15014_89	PDNIKFVTPVPGPQGKEGKSKSKRSKSGKDTSKPTPGTSLF
O15014_91	NIKFVTPVPGPQGKEGKSKSKRSKSGKDTSKPTPGTSLFTP
O15014_925	QSSPGALNPSSQAGVESQALKTKRDEEPESIEGKVKNDICE
O15014_938	GVESQALKTKRDEEPESIEGKVKNDICEEKKPELSSSSQQP
O15014_94	FVTPVPGPQGKEGKSKSKRSKSGKDTSKPTPGTSLFTPSEG
O15014_947	KRDEEPESIEGKVKNDICEEKKPELSSSSQQPSVIQQRPNM
O15015_1023	VVDSVLEDIVNSVSGEGGDAKSQEGAGTPLGDSLCIQGGES
O15015_1059	QGGESLLEAQPRPFRCNQCGKTYRHGGSLVNHRKIHQTGDF
O15015_1072	FRCNQCGKTYRHGGSLVNHRKIHQTGDFLCPVCSRCYPNLA
O15015_1105	SRCYPNLAAYRNHLRNHPRCKGSEPQVGPIPEAAGSSELQV
O15015_111	KSHMRTHAPEGRRRHRPPRPKEATPHLQGETVSTDSWGQRL
O15015_1237	SLINHRQSHQTGHFGCQACSKGFSNLMSLKNHRRIHADPRR
O15015_1246	QTGHFGCQACSKGFSNLMSLKNHRRIHADPRRFRCSECGKA
O15015_1291	KQLASHQRVHMERRGGGGTRKATREDRPFRCGQCGRTYRHA
O15015_1553	CSQCGKTYCQSGSLLNHNTNKTDRHYCLLCSKEFLNPVATK
O15015_1573	KTDRHYCLLCSKEFLNPVATKSHSHNHIDAQTFACPDCGKA
O15015_1625	QAHARGHSQVPAQMEEARDPKAGTGEDQVVLPGQGKAQEAP
O15015_1640	EARDPKAGTGEDQVVLPGQGKAQEAPSETPRGPGESVERAR
O15015_1673	GESVERARGGQAVTSMAAEDKERPFRCTQCGRSYRHAGSLL
O15015_328	ELLEHQQSHEGERQEPRWEEKGMPTTNGHTDESSQDQLPSA
O15015_602	LLFEDAESLERHGLTHGAGEKENSRTETTMSPPRAFACRDC
O15015_676	MAAMKNHLRRHSRRRSRRHRKRAGGASGGREAKLLAAESWT
O15015_738	GAEGNLESDGDCLQAESEGDKCGLERDETHFQGDKESGGTG
O15015_988	DDLGSLERHHQSQSSGTTADKAPSPLGVAGDAMEMVVDSVL
O15042_1005	SPSGSRTPKRSRRSRSRSPKKSGKKSRSQSRSPHRSHKKSK
O15042_1009	SRTPKRSRRSRSRSPKKSGKKSRSQSRSPHRSHKKSKKNKH
O15042_1022	SPKKSGKKSRSQSRSPHRSHKKSKKNKHXXXXXXXXXXXXX
O15042_1023	PKKSGKKSRSQSRSPHRSHKKSKKNKHXXXXXXXXXXXXXX
O15042_1025	KSGKKSRSQSRSPHRSHKKSKKNKHXXXXXXXXXXXXXXXX
O15042_105	SIGKMSTAKRTLSKKEQEELKKKEDEKAAAEIYEEFLAAFE
O15042_106	IGKMSTAKRTLSKKEQEELKKKEDEKAAAEIYEEFLAAFEG
O15042_111	TAKRTLSKKEQEELKKKEDEKAAAEIYEEFLAAFEGSDGNK
O15042_131	KAAAEIYEEFLAAFEGSDGNKVKTFVRGGVVNAAKEEHETD
O15042_133	AAEIYEEFLAAFEGSDGNKVKTFVRGGVVNAAKEEHETDEK
O15042_153	KTFVRGGVVNAAKEEHETDEKRGKIYKPSSRFADQKNPPNQ
O15042_159	GVVNAAKEEHETDEKRGKIYKPSSRFADQKNPPNQSSNERP
O15042_189	NPPNQSSNERPPSLLVIETKKPPLKKGEKEKKKSNLELFKE
O15042_197	ERPPSLLVIETKKPPLKKGEKEKKKSNLELFKEELKQIQEE
O15042_200	PSLLVIETKKPPLKKGEKEKKKSNLELFKEELKQIQEERDE
O15042_201	SLLVIETKKPPLKKGEKEKKKSNLELFKEELKQIQEERDER
O15042_223	NLELFKEELKQIQEERDERHKTKGRLSRFEPPQSDSDGQRR
O15042_304	QMNEEMLCQEFGRFGPLASVKIMWPRTDEERARERNCGFVA
O15042_341	GFVAFMNRRDAERALKNLNGKMIMSFEMKLGWGKAVPIPPH
O15042_354	ALKNLNGKMIMSFEMKLGWGKAVPIPPHPIYIPPSMMEHTL
O15042_403	FNAQPRERLKNPNAPMLPPPKNKEDFEKTLSQAIVKVVIPT
O15042_418	MLPPPKNKEDFEKTLSQAIVKVVIPTERNLLALIHRMIEFV
O15042_476	NPMFRFLFENQTPAHVYYRWKLYSILQGDSPTKWRTEDFRM
O15042_488	PAHVYYRWKLYSILQGDSPTKWRTEDFRMFKNGSFWRPPPL
O15042_52	DASGPSDSDMPSRTRPKSPRKHNYRNESARESLCDSPHQNL
O15042_530	PYLHGMSEEQETEAFVEEPSKKGALKEEQRDKLEEILRGLT
O15042_535	MSEEQETEAFVEEPSKKGALKEEQRDKLEEILRGLTPRKND
O15042_553	ALKEEQRDKLEEILRGLTPRKNDIGDAMVFCLNNAEAAEEI
O15042_590	AEEIVDCITESLSILKTPLPKKIARLYLVSDVLYNSSAKVA
O15042_591	EEIVDCITESLSILKTPLPKKIARLYLVSDVLYNSSAKVAN
O15042_608	LPKKIARLYLVSDVLYNSSAKVANASYYRKFFETKLCQIFS
O15042_647	FSDLNATYRTIQGHLQSENFKQRVMTCFRAWEDWAIYPEPF
O15042_810	EEENQNQEEESEDEEDTQSSKSEEHHLYSNPIKEEMTESKF
O15042_82	ESLCDSPHQNLSRPLLENKLKAFSIGKMSTAKRTLSKKEQE
O15042_843	EEMTESKFSKYSEMSEEKRAKLREIELKVMKFQDELESGKR
O15042_850	FSKYSEMSEEKRAKLREIELKVMKFQDELESGKRPKKPGQS
O15042_853	YSEMSEEKRAKLREIELKVMKFQDELESGKRPKKPGQSFQE
O15042_887	PGQSFQEQVEHYRDKLLQREKEKELERERERDKKDKEKLES
O15042_899	RDKLLQREKEKELERERERDKKDKEKLESRSKDKKEKDECT
O15042_904	QREKEKELERERERDKKDKEKLESRSKDKKEKDECTPTRKE
O15042_912	ERERERDKKDKEKLESRSKDKKEKDECTPTRKERKRRHSTS
O15042_915	RERDKKDKEKLESRSKDKKEKDECTPTRKERKRRHSTSPSP
O15042_923	EKLESRSKDKKEKDECTPTRKERKRRHSTSPSPSRSSSGRR
O15042_93	SRPLLENKLKAFSIGKMSTAKRTLSKKEQEELKKKEDEKAA
O15042_945	RKRRHSTSPSPSRSSSGRRVKSPSPKSERSERSERSHKESS
O15042_950	STSPSPSRSSSGRRVKSPSPKSERSERSERSHKESSRSRSS
O15042_98	ENKLKAFSIGKMSTAKRTLSKKEQEELKKKEDEKAAAEIYE
O15042_980	SHKESSRSRSSHKDSPRDVSKKAKRSPSGSRTPKRSRRSRS
O15042_981	HKESSRSRSSHKDSPRDVSKKAKRSPSGSRTPKRSRRSRSR
O15054_1004	RRHRRACKDSVGRRPREGRAKAKAKVPKEKSRRVLGNLDLQ
O15054_1011	KDSVGRRPREGRAKAKAKVPKEKSRRVLGNLDLQSEEIQGR
O15054_1013	SVGRRPREGRAKAKAKVPKEKSRRVLGNLDLQSEEIQGREK
O15054_1072	PPSAPAPSAQPTPPSASVPGKKAREEAPGPPGVSRADMLKL
O15054_1101	PPGVSRADMLKLRSLSEGPPKELKIRLIKVESGDKETFIAS
O15054_1150	MADLTISHCAADVVRASRNAKVKGKFRESYLSPAQSVKPKI
O15054_1167	RNAKVKGKFRESYLSPAQSVKPKINTEEKLPREKLNPPTPS
O15054_1175	FRESYLSPAQSVKPKINTEEKLPREKLNPPTPSIYLESKRD
O15054_1193	EEKLPREKLNPPTPSIYLESKRDAFSPVLLQFCTDPRNPIT
O15054_1232	ITVIRGLAGSLRLNLGLFSTKTLVEASGEHTVEVRTQVQQP
O15054_1279	LTGTRQIWPCESSRSHTTIAKYAQYQASSFQESLQEEKESE
O15054_1296	TIAKYAQYQASSFQESLQEEKESEDEESEEPDSTTGTPPSS
O15054_1321	EESEEPDSTTGTPPSSAPDPKNHHIIKFGTNIDLSDAKRWK
O15054_1327	DSTTGTPPSSAPDPKNHHIIKFGTNIDLSDAKRWKPQLQEL
O15054_1341	KNHHIIKFGTNIDLSDAKRWKPQLQELLKLPAFMRVTSTGN
O15054_1381	NMLSHVGHTILGMNTVQLYMKVPGSRTPGHQENNNFCSVNI
O15054_1506	GPLTAYQYQLALERYEWNEVKNVKSIVPMIHVSWNVARTVK
O15054_1509	TAYQYQLALERYEWNEVKNVKSIVPMIHVSWNVARTVKISD
O15054_1534	MIHVSWNVARTVKISDPDLFKMIKFCLLQSMKHCQVQRESL
O15054_1559	CLLQSMKHCQVQRESLVRAGKKIAYQGRVKDEPAYYCNECD
O15054_168	GRLQQAQLWNFHTGSCQHRAKVLPPLEQVWNLLHLEHKRNY
O15054_185	HRAKVLPPLEQVWNLLHLEHKRNYGAKRGGPPVKRAAEPPV
O15054_191	PPLEQVWNLLHLEHKRNYGAKRGGPPVKRAAEPPVVQPVPP
O15054_198	NLLHLEHKRNYGAKRGGPPVKRAAEPPVVQPVPPAALSGPS
O15054_636	QNTSGSFRRPESPRPRVSFPKTPEVGPGPPPGPLSKAPQPV
O15054_700	DQFEEPAEFKILPDGLANIMKMLDESIRKEEEQQQHEAGVA
O15054_708	FKILPDGLANIMKMLDESIRKEEEQQQHEAGVAPQPPLKEP
O15054_726	IRKEEEQQQHEAGVAPQPPLKEPFASLQSPFPTDTAPTTTA
O15054_783	ATQEEEKKPPPALPPPPPLAKFPPPSQPQPPPPPPPSPASL
O15054_815	PPPPSPASLLKSLASVLEGQKYCYRGTGAAVSTRPGPLPTT
O15054_89	GHPSKPYYAPGAPTPRPLHGKLESLHGCVQALLREPAQPGL
O15060_248	PLLGTVSTGIQTSTSSCQPYKVQSNGDFSKNSFLTPDNAVD
O15060_284	DNAVDITTGTNSCLSNSEHSKDPGFGQMDELQLEDLGDDDL
O15060_349	ELAFGENDNRENKAMPCQVCKKVLEPNIQLIRQHARDHVDL
O15060_45	LSETMCDVTIVVGSRSFPAHKAVLACAAGYFQNLFLNTGLD
O15060_458	GKLGLFSGAASPELKCAACGKVLAKDFHVVRGHILDHLNLK
O15060_462	LFSGAASPELKCAACGKVLAKDFHVVRGHILDHLNLKGQAC
O15060_478	KVLAKDFHVVRGHILDHLNLKGQACSVCDQRHLNLCSLMWH
O15060_525	ISVFSCSVCANSFVDWHLLEKHMAVHQSLEDALFHCRLCSQ
O15060_548	AVHQSLEDALFHCRLCSQSFKSEAAYRYHVSQHKCNSGLDA
O15060_604	LPAEEFLGEELALQGQPGNSKYSCKVCGKRFAHTSEFNYHR
O15060_653	YQCKVCHKFFRGRSTIKCHLKTHSGALMYRCTVCGHYSSTL
O15060_678	ALMYRCTVCGHYSSTLNLMSKHVGVHKGSLPPDFTIEQTFM
O15060_684	TVCGHYSSTLNLMSKHVGVHKGSLPPDFTIEQTFMYIIHSK
O15060_704	KGSLPPDFTIEQTFMYIIHSKEADKNPDSXXXXXXXXXXXX
O15060_708	PPDFTIEQTFMYIIHSKEADKNPDSXXXXXXXXXXXXXXXX
O15060_82	TGLDAARTYVVDFITPANFEKVLSFVYTSELFTDLINVGVI
O15062_113	ESNVMDVLLAASHLHLNSVVKACKHYLTTRTLPMSPPSERV
O15062_116	VMDVLLAASHLHLNSVVKACKHYLTTRTLPMSPPSERVQEQ
O15062_192	SSSMRSNLDQRTPFPMRRLHKRKQSAEERARQRLRPSIDES
O15062_194	SMRSNLDQRTPFPMRRLHKRKQSAEERARQRLRPSIDESAI
O15062_596	PSQPGPPQLTRASADVLSKCKKALSEHNVLVVEGARKYACK
O15145_165	CEKVFDPQNDKPSKWWTCFVKRQFMNKSLSGPGQXXXXXXX
O15145_50	GPAPRETKDTDIVDEAIYYFKANVFFKNYEIKNEADRTLIY
O15145_56	TKDTDIVDEAIYYFKANVFFKNYEIKNEADRTLIYITLYIS
O15145_61	IVDEAIYYFKANVFFKNYEIKNEADRTLIYITLYISECLKK
O15145_80	IKNEADRTLIYITLYISECLKKLQKCNSKSQGEKEMYTLGI
O15145_81	KNEADRTLIYITLYISECLKKLQKCNSKSQGEKEMYTLGIT
O15145_93	LYISECLKKLQKCNSKSQGEKEMYTLGITNFPIPGEPGFPL
O15164_1002	PDSEVANAGIKLENYFEELLKNLYPEKRFPKPEFRNESEDN
O15164_1008	NAGIKLENYFEELLKNLYPEKRFPKPEFRNESEDNKFSDDS
O15164_1038	ESEDNKFSDDSDDDFVQPRKKRLKSIEERQLLKXXXXXXXX
O15164_198	ECVEWLCKTCIRAHQRVKFTKDHTVRQKEEVSPEAVGVTSQ
O15164_280	EEAFQNQKVIIDTLITKLMEKTKYIKFTGNQIQNRIIEVNQ
O15164_282	AFQNQKVIIDTLITKLMEKTKYIKFTGNQIQNRIIEVNQNQ
O15164_310	QIQNRIIEVNQNQKQVEQDIKVAIFTLMVEINKKGKALLHQ
O15164_354	LAKDHRMKLMQQQQEVAGLSKQLEHVMHFSKWAVSSGSSTA
O15164_364	QQQQEVAGLSKQLEHVMHFSKWAVSSGSSTALLYSKRLITY
O15164_379	VMHFSKWAVSSGSSTALLYSKRLITYRLRHLLRARCDASPV
O15164_567	PRQAIKPNPLQMAFLAQQAIKQWQISSGQGTPSTTNSTSST
O15164_843	DPNEDWCAVCQNGGELLCCEKCPKVFHLSCHVPTLTNFPSG
O15164_905	PSHNSEKKKTEGLVKLTPIDKRKCERLLLFLYCHEMSLAFQ
O15164_950	LTVPDYYKIIKNPMDLSTIKKRLQEDYSMYSKPEDFVADFR
O15212_122	EQQRETLAQLQQEFQRAQAAKAGAPGKAXXXXXXXXXXXXX
O15212_21	MAELIQKKLQGEVEKYQQLQKDLSKSMSGRQKLEAQLTENN
O15212_58	TENNIVKEELALLDGSNVVFKLLGPVLVKQELGEARATVGK
O15212_78	KLLGPVLVKQELGEARATVGKRLDYITAEIKRYESQLRDLE
O15226_176	PSPSQTFPESVVAEKQYFIEKLTATIWKNLSNPEMTSGSDK
O15226_233	NPEYIYAPLKEIPPADIPKNKKLLTDGYACEVRCQNIYLTT
O15226_272	TTGYAGSKNGSRDRATELAVKLLQKRIEVRVVRRKFKHTFG
O15226_276	AGSKNGSRDRATELAVKLLQKRIEVRVVRRKFKHTFGEDLV
O15226_286	ATELAVKLLQKRIEVRVVRRKFKHTFGEDLVVCQIGMSSYE
O15226_312	GEDLVVCQIGMSSYEFPPALKPPEDLVVLGKDASGQPIFNA
O15226_322	MSSYEFPPALKPPEDLVVLGKDASGQPIFNASAKHWTNFVI
O15226_395	TWRCRVFLQDHCLAEGYGTKKTSKHAAADEALKILQKTQPT
O15226_479	AQFNRMTVEYVYERMTGLRWKCKVILESEVIAEAVGVKKTV
O15265_103	PLPSPEVMLGQSWNLWVEASKLPGKDGTELDESFKEFGKNR
O15265_107	PEVMLGQSWNLWVEASKLPGKDGTELDESFKEFGKNREVMG
O15265_121	ASKLPGKDGTELDESFKEFGKNREVMGLCREDMPIFGFCPA
O15265_158	FCPAHDDFYLVVCNDCNQVVKPQAFQSHYERRHSSSSKPPL
O15265_220	ASGSNRSSSGGVLSASSSSSKLLKSPKEKLQLRGNTRPMHP
O15265_223	SNRSSSGGVLSASSSSSKLLKSPKEKLQLRGNTRPMHPIQQ
O15265_226	SSSGGVLSASSSSSKLLKSPKEKLQLRGNTRPMHPIQQSRV
O15265_260	PIQQSRVPHGRIMTPSVKVEKIHPKMDGTLLKSAVGPTCPA
O15265_264	SRVPHGRIMTPSVKVEKIHPKMDGTLLKSAVGPTCPATVSS
O15265_271	IMTPSVKVEKIHPKMDGTLLKSAVGPTCPATVSSLVKPGLN
O15265_297	TCPATVSSLVKPGLNCPSIPKPTLPSPGQILNGKGLPAPPT
O15265_310	LNCPSIPKPTLPSPGQILNGKGLPAPPTLEKKPEDNSNNRK
O15265_320	LPSPGQILNGKGLPAPPTLEKKPEDNSNNRKFLNKRLSERE
O15265_330	KGLPAPPTLEKKPEDNSNNRKFLNKRLSEREFDPDIHCGVI
O15265_355	RLSEREFDPDIHCGVIDLDTKKPCTRSLTCKTHSLTQRRAV
O15265_390	TQRRAVQGRRKRFDVLLAEHKNKTREKELIRHPDSQQPPQP
O15265_438	PPRTSQEPHQNPHGVIPSESKPFVASKPKPHTPSLPRPPGC
O15265_500	PLPATEPASRLSSEEGEGDDKEESVEKLDCHYSGHHPQPAS
O15265_553	YYVFDSRWNRLRCALNLMVEKHLNAQLWKKIPPVPSTTSPI
O15265_561	NRLRCALNLMVEKHLNAQLWKKIPPVPSTTSPISTRIPHRT
O15265_670	SSSPSTPSGLSSVPSSPMSRKPQKLKSSKSLRPKESSGNST
O15265_683	PSSPMSRKPQKLKSSKSLRPKESSGNSTNCQNASSSTSGGS
O15265_706	SGNSTNCQNASSSTSGGSGKKRKNSSPLLVHSSSSSSSSSS
O15265_838	SHGSFSHSHTPLDKLIGKKRKCSPSSSSINNSSSKPTKVAK
O15265_852	LIGKKRKCSPSSSSINNSSSKPTKVAKVPAVNNVHMKHTGT
O15265_855	KKRKCSPSSSSINNSSSKPTKVAKVPAVNNVHMKHTGTIPG
O15265_858	KCSPSSSSINNSSSKPTKVAKVPAVNNVHMKHTGTIPGAQG
O15265_889	HTGTIPGAQGLMNSSLLHQPKARPXXXXXXXXXXXXXXXXX
O15350_149	VTFQQSSTAKSATWTYSPLLKKLYCQIAKTCPIQIKVSTPP
O15350_150	TFQQSSTAKSATWTYSPLLKKLYCQIAKTCPIQIKVSTPPP
O15350_182	QIKVSTPPPPGTAIRAMPVYKKAEHVTDVVKRCPNHELGRD
O15350_183	IKVSTPPPPGTAIRAMPVYKKAEHVTDVVKRCPNHELGRDF
O15350_321	DRKADEDHYREQQALNESSAKNGAASKRAFKQSPPAVPALG
O15350_346	SKRAFKQSPPAVPALGAGVKKRRHGDEDTYYLQVRGRENFE
O15350_370	GDEDTYYLQVRGRENFEILMKLKESLELMELVPQPLVDSYR
O15350_372	EDTYYLQVRGRENFEILMKLKESLELMELVPQPLVDSYRQQ
O15350_532	QGLQSIYHLQNLTIEDLGALKIPEQYRMTIWRGLQDLKQGH
O15350_549	GALKIPEQYRMTIWRGLQDLKQGHDYSTAQQLLRSSNAATI
O15350_620	GGPGGGPDEWADFGFDLPDCKARKQPIKEEFTEAEIHXXXX
O15350_623	GGGPDEWADFGFDLPDCKARKQPIKEEFTEAEIHXXXXXXX
O15372_165	EESVVLIYDPIKTAQGSLSLKAYRLTPKLMEVCKEKDFSPE
O15372_172	YDPIKTAQGSLSLKAYRLTPKLMEVCKEKDFSPEALKKANI
O15372_180	GSLSLKAYRLTPKLMEVCKEKDFSPEALKKANITFEYMFEE
O15372_188	RLTPKLMEVCKEKDFSPEALKKANITFEYMFEEVPIVIKNS
O15372_189	LTPKLMEVCKEKDFSPEALKKANITFEYMFEEVPIVIKNSH
O15372_206	ALKKANITFEYMFEEVPIVIKNSHLINVLMWELEKKSAVAD
O15372_220	EVPIVIKNSHLINVLMWELEKKSAVADKHELLSLASSNHLG
O15372_221	VPIVIKNSHLINVLMWELEKKSAVADKHELLSLASSNHLGK
O15372_241	KSAVADKHELLSLASSNHLGKNLQLLMDRVDEMSQDIVKYN
O15372_259	LGKNLQLLMDRVDEMSQDIVKYNTYMRNTSKQQQQKHQYQQ
O15372_26	EGTGSTATSSSSTAGAAGKGKGKGGSGDSAVKQVQIDGLVV
O15372_274	SQDIVKYNTYMRNTSKQQQQKHQYQQRRQQENMQRQSRGEP
O15372_28	TGSTATSSSSTAGAAGKGKGKGGSGDSAVKQVQIDGLVVLK
O15372_340	AGQINTYCQNIKEFTAQNLGKLFMAQALQEYNNXXXXXXXX
O15372_48	KGGSGDSAVKQVQIDGLVVLKIIKHYQEEGQGTEVVQGVLL
O15381_177	TGSIPLKTPAKDSEGGWFIDKTPSVKKDSFFLDLSCEKSNP
O15381_198	TPSVKKDSFFLDLSCEKSNPKKPITEIQDSKDSSLLESDMK
O15381_220	PITEIQDSKDSSLLESDMKRKGKLKNKGSKRKKEDLQEVDG
O15381_224	IQDSKDSSLLESDMKRKGKLKNKGSKRKKEDLQEVDGEIEA
O15381_226	DSKDSSLLESDMKRKGKLKNKGSKRKKEDLQEVDGEIEAVL
O15381_229	DSSLLESDMKRKGKLKNKGSKRKKEDLQEVDGEIEAVLQKK
O15381_231	SLLESDMKRKGKLKNKGSKRKKEDLQEVDGEIEAVLQKKAK
O15381_249	KRKKEDLQEVDGEIEAVLQKKAKARGLEFQISNVKFEDVGG
O15381_275	LEFQISNVKFEDVGGNDMTLKEVCKMLIHMRHPEVYHHLGV
O15381_279	ISNVKFEDVGGNDMTLKEVCKMLIHMRHPEVYHHLGVVPPR
O15381_328	GCGKTLLAHAIAGELDLPILKVAAPEIVSGVSGESEQKLRE
O15381_372	QAVSNAPCIIFIDEIDAITPKREVASKDMERRIVAQLLTCM
O15381_450	ICLGIPDEASRERILQTLCRKLRLPQAFDFCHLAHLTPGFV
O15381_492	ADLMALCREAAMCAVNRVLMKLQEQQKKNPEMEDLPSKGVQ
O15381_498	CREAAMCAVNRVLMKLQEQQKKNPEMEDLPSKGVQEERLGT
O15381_568	GLCIELNDFIVALSSVQPSAKREGFVTVPNVTWADIGALED
O15381_608	DIREELTMAILAPVRNPDQFKALGLVTPAGVLLAGPPGCGK
O15381_647	GKTLLAKAVANESGLNFISVKGPELLNMYVGESERAVRQVF
O15381_742	AATNRPDIIDPAILRPGRLDKTLFVGLPPPADRLAILKTIT
O15381_759	RLDKTLFVGLPPPADRLAILKTITKNGTKPPLDADVNLEAI
O15381_763	TLFVGLPPPADRLAILKTITKNGTKPPLDADVNLEAIAGDL
O15381_767	GLPPPADRLAILKTITKNGTKPPLDADVNLEAIAGDLRCDC
O15381_813	LSALVREASICALRQEMARQKSGNEKGELKVSHKHFEEAFK
O15381_826	RQEMARQKSGNEKGELKVSHKHFEEAFKKVRSSISKKDQIM
O15381_834	SGNEKGELKVSHKHFEEAFKKVRSSISKKDQIMYERLQESL
O15446_175	NPPVTGPRSALAPNLLTSGKKKKEMQVTEAPVTQEAVNGHG
O15446_176	PPVTGPRSALAPNLLTSGKKKKEMQVTEAPVTQEAVNGHGA
O15446_213	GHGALEVDMALGSPEMDVRKKKKKKNQQLKEPEAAGPVGTE
O15446_214	HGALEVDMALGSPEMDVRKKKKKKNQQLKEPEAAGPVGTEP
O15446_217	LEVDMALGSPEMDVRKKKKKKNQQLKEPEAAGPVGTEPTVE
O15446_222	ALGSPEMDVRKKKKKKNQQLKEPEAAGPVGTEPTVETLEPL
O15446_251	GTEPTVETLEPLGVLFPSTTKKRKKPKGKETFEPEDKTVKQ
O15446_254	PTVETLEPLGVLFPSTTKKRKKPKGKETFEPEDKTVKQEQI
O15446_255	TVETLEPLGVLFPSTTKKRKKPKGKETFEPEDKTVKQEQIN
O15446_257	ETLEPLGVLFPSTTKKRKKPKGKETFEPEDKTVKQEQINTE
O15446_267	PSTTKKRKKPKGKETFEPEDKTVKQEQINTEPLEDTVLSPT
O15446_289	VKQEQINTEPLEDTVLSPTKKRKRQKGTEGMEPEEGVTVES
O15446_329	SQPQVKVEPLEEAIPLPPTKKRKKEKGQMAMMEPGTEAMEP
O15446_331	PQVKVEPLEEAIPLPPTKKRKKEKGQMAMMEPGTEAMEPVE
O15446_332	QVKVEPLEEAIPLPPTKKRKKEKGQMAMMEPGTEAMEPVEP
O15446_385	APQQPEGAKPQAQAALAAPKKKTKKEKQQDATVEPETEVVG
O15446_386	PQQPEGAKPQAQAALAAPKKKTKKEKQQDATVEPETEVVGP
O15446_388	QPEGAKPQAQAALAAPKKKTKKEKQQDATVEPETEVVGPEL
O15446_391	GAKPQAQAALAAPKKKTKKEKQQDATVEPETEVVGPELPDD
O15446_422	EVVGPELPDDLEPQAAPTSTKKKKKKKERGHTVTEPIQPLE
O15446_423	VVGPELPDDLEPQAAPTSTKKKKKKKERGHTVTEPIQPLEP
O15446_424	VGPELPDDLEPQAAPTSTKKKKKKKERGHTVTEPIQPLEPE
O15446_426	PELPDDLEPQAAPTSTKKKKKKKERGHTVTEPIQPLEPELP
O15446_427	ELPDDLEPQAAPTSTKKKKKKKERGHTVTEPIQPLEPELPG
O15446_428	LPDDLEPQAAPTSTKKKKKKKERGHTVTEPIQPLEPELPGE
O15446_461	LEPELPGEGQPEARATPGSTKKRKKQSQESRMPETVPQEEM
O15446_464	ELPGEGQPEARATPGSTKKRKKQSQESRMPETVPQEEMPGP
O15446_70	DFAPECFNGRHVPLSGSQIVKGKLAGKRHRYRVLSSCPQAG
O15446_72	APECFNGRHVPLSGSQIVKGKLAGKRHRYRVLSSCPQAGEA
O15446_76	FNGRHVPLSGSQIVKGKLAGKRHRYRVLSSCPQAGEATLLA
O15525_101	KQKAELQQEVEKLASENASMKLELDALRSKYEALQTFARTV
O15525_157	LGPLVPGKVAATSVITIVKSKTDARSXXXXXXXXXXXXXXX
O15525_81	NRGYAASCRVKRVTQKEELEKQKAELQQEVEKLASENASMK
O15535_204	HSIGETDEVTKTEDRELVLRKDCPKIVEPHGKMFNEQTWEV
O15535_41	ELLTMKVEAKSHLQWQESRLKRSNPLAREIFRRHFRQLCYQ
O43143_143	HTPRYYDILKKRLQLPVWEYKDRFTDILVRHQSFVLVGETG
O43143_166	FTDILVRHQSFVLVGETGSGKTTQIPQWCVEYMRSLPGPKR
O43143_18	XXXMSKRHRLDLGEDYPSGKKRAGTDGKDRDRDRDREDRSK
O43143_234	GQEVGYSIRFEDCSSAKTILKYMTDGMLLREAMNDPLLERY
O43143_287	LATDILMGVLKEVVRQRSDLKVIVMSATLDAGKFQIYFDNC
O43143_367	EEEGDLLLFLTGQEEIDEACKRIKREVDDLGPEVGDIKIIP
O43143_38	KRAGTDGKDRDRDRDREDRSKDRDRERDRGDREREREKEKE
O43143_416	QQQRIFEPPPPKKQNGAIGRKVVVSTNIAETSLTIDGVVFV
O43143_443	IAETSLTIDGVVFVIDPGFAKQKVYNPRIRVESLLVTAISK
O43143_445	ETSLTIDGVVFVIDPGFAKQKVYNPRIRVESLLVTAISKAS
O43143_488	QRAGRAGRTRPGKCFRLYTEKAYKTEMQDNTYPEILRSNLG
O43143_516	DNTYPEILRSNLGSVVLQLKKLGIDDLVHFDFMDPPAPETL
O43143_55	DRSKDRDRERDRGDREREREKEKEKELRASTNAMLISAGLP
O43143_573	GDLTELGSMMAEFPLDPQLAKMVIASCDYNCSNEVLSITAM
O43143_607	VLSITAMLSVPQCFVRPTEAKKAADEAKMRFAHIDGDHLTL
O43143_635	MRFAHIDGDHLTLLNVYHAFKQNHESVQWCYDNFINYRSLM
O43143_691	FNLPRRSTDFTSRDYYINIRKALVTGYFMQVAHLERTGHYL
O43143_714	VTGYFMQVAHLERTGHYLTVKDNQVVQLHPSTVLDHKPEWV
O43143_730	YLTVKDNQVVQLHPSTVLDHKPEWVLYNEFVLTTKNYIRTC
O43143_78	EKELRASTNAMLISAGLPPLKASHSAHSTHSAHSTHSTHSA
O43151_1012	GCKYARSKTPRKFRLAGDNPKEEEVLRKSFQDLATEVAPLY
O43151_1019	KTPRKFRLAGDNPKEEEVLRKSFQDLATEVAPLYKRLAPQA
O43151_105	KLRKCEVLKKKVGLLKEVEIKAGEGAGPWGQGAAVKTGSEL
O43151_1058	QAYQNQVTNEEIAIDCRLGLKEGRPFAGVTACMDFCAHAHK
O43151_1095	HAHKDQHNLYNGCTVVCTLTKEDNRCVGKIPEDEQLHVLPL
O43151_1103	LYNGCTVVCTLTKEDNRCVGKIPEDEQLHVLPLYKMANTDE
O43151_1133	LPLYKMANTDEFGSEENQNAKVGSGAIQVLTAFPREVRRLP
O43151_1173	PEPAKSCRQRQLEARKAAAEKKKIQKEKLSTPEKIKQEALE
O43151_1174	EPAKSCRQRQLEARKAAAEKKKIQKEKLSTPEKIKQEALEL
O43151_1175	PAKSCRQRQLEARKAAAEKKKIQKEKLSTPEKIKQEALELA
O43151_1178	SCRQRQLEARKAAAEKKKIQKEKLSTPEKIKQEALELAGIT
O43151_1186	ARKAAAEKKKIQKEKLSTPEKIKQEALELAGITSDPGLSLK
O43151_120	KEVEIKAGEGAGPWGQGAAVKTGSELSPVDGPVPGQMDSGP
O43151_1230	SQQGLKPSLKVEPQNHFSSFKYSGNAVVESYSVLGNCRPSD
O43151_1365	VPTDAHHPTPHHQQPAYPGPKEYLLPKAPLLHSVSRDPSPF
O43151_1419	EPVDPLTQAEPVPRDAGKMGKTPLSEVSQNGGPSHLWGQYS
O43151_1447	QNGGPSHLWGQYSGGPSMSPKRTNGVGGSWGVFSSGESPAI
O43151_1471	GVGGSWGVFSSGESPAIVPDKLSSFGASCLAPSHFTDGQWG
O43151_1517	GQQAASHSGGRLRGKPWSPCKFGNSTSALAGPSLTEKPWAL
O43151_1533	WSPCKFGNSTSALAGPSLTEKPWALGAGDFNSALKGSPGFQ
O43151_1555	WALGAGDFNSALKGSPGFQDKLWNPMKGEEGRIPAAGASQL
O43151_1591	GASQLDRAWQSFGLPLGSSEKLFGALKSEEKLWDPFSLEEG
O43151_1626	FSLEEGPAEEPPSKGAVKEEKGGGGAEEEEEELWSDSEHNF
O43151_1712	VFYQHKNLNQPNHGLALWEAKMKQLAERARARQEEAARLGL
O43151_1714	YQHKNLNQPNHGLALWEAKMKQLAERARARQEEAARLGLGQ
O43151_1743	RQEEAARLGLGQQEAKLYGKKRKWGGTVVAEPQQKEKKGVV
O43151_1759	LYGKKRKWGGTVVAEPQQKEKKGVVPTRQALAVPTDSAVTV
O43151_1786	RQALAVPTDSAVTVSSYAYTKVTGPYSRWIXXXXXXXXXXX
O43151_268	AGSEDLDTLQTALALARHGMKPPNCNCDGPECPDYLEWLEG
O43151_291	NCNCDGPECPDYLEWLEGKIKSVVMEGGEERPRLPGPLPPG
O43151_348	VPQISPQEGLPLSQSALSIAKEKNISLQTAIAIEALTQLSS
O43151_350	QISPQEGLPLSQSALSIAKEKNISLQTAIAIEALTQLSSAL
O43151_487	LGSASDYIQSVFKRPEALPTKPKVKVEAPSSSPAPAPSPVL
O43151_52	GSGLSMAGSESQLRGGGDGRKKRKRCGTCEPCRRLENCGAC
O43151_53	SGLSMAGSESQLRGGGDGRKKRKRCGTCEPCRRLENCGACT
O43151_535	SSEPDTHQKAQTALQQHLHHKRSLFLEQVHDTSFPAPSEPS
O43151_55	LSMAGSESQLRGGGDGRKKRKRCGTCEPCRRLENCGACTSC
O43151_579	WWPPPSSPVPRLPDRPPKEKKKKLPTPAGGPVGTEKAAPGI
O43151_580	WPPPSSPVPRLPDRPPKEKKKKLPTPAGGPVGTEKAAPGIK
O43151_581	PPPSSPVPRLPDRPPKEKKKKLPTPAGGPVGTEKAAPGIKP
O43151_605	PAGGPVGTEKAAPGIKPSVRKPIQIKKSRPREAQPLFPPVR
O43151_610	VGTEKAAPGIKPSVRKPIQIKKSRPREAQPLFPPVRQIVLE
O43151_611	GTEKAAPGIKPSVRKPIQIKKSRPREAQPLFPPVRQIVLEG
O43151_706	PSPMTALQPGSTGPLPPADDKLEELIRQFEAEFGDSFGLPG
O43151_755	PENQQTCLPAPESPFATRSPKQIKIESSGAVTVLSTTCFHS
O43151_758	QQTCLPAPESPFATRSPKQIKIESSGAVTVLSTTCFHSEEG
O43151_804	PTKAENPLTPTLSGFLESPLKYLDTPTKSLLDTPAKRAQAE
O43151_837	PAKRAQAEFPTCDCVEQIVEKDEGPYYTHLGSGPTVASIRE
O43151_85	RLENCGACTSCTNRRTHQICKLRKCEVLKKKVGLLKEVEIK
O43151_874	SIRELMEERYGEKGKAIRIEKVIYTGKEGKSSRGCPIAKWV
O43151_88	NCGACTSCTNRRTHQICKLRKCEVLKKKVGLLKEVEIKAGE
O43151_880	EERYGEKGKAIRIEKVIYTGKEGKSSRGCPIAKWVIRRHTL
O43151_883	YGEKGKAIRIEKVIYTGKEGKSSRGCPIAKWVIRRHTLEEK
O43151_93	TSCTNRRTHQICKLRKCEVLKKKVGLLKEVEIKAGEGAGPW
O43151_94	SCTNRRTHQICKLRKCEVLKKKVGLLKEVEIKAGEGAGPWG
O43151_971	GNPTSRRCGLNDDRTCACQGKDPNTCGASFSFGCSWSMYFN
O43151_999	SFSFGCSWSMYFNGCKYARSKTPRKFRLAGDNPKEEEVLRK
O43175_146	ASMKDGKWERKKFMGTELNGKTLGILGLGRIGREVATRMQS
O43175_170	ILGLGRIGREVATRMQSFGMKTIGYDPIISPEVSASFGVQQ
O43175_226	HTPLLPSTTGLLNDNTFAQCKKGVRVVNCARGGIVDEGALL
O43175_330	KSLTGVVNAQALTSAFSPHTKPWIGLAEALGTLMRAWAGSP
O43175_364	RAWAGSPKGTIQVITQGTSLKNAGNCLSPAVIVGLLKEASK
O43175_398	LLKEASKQADVNLVNAKLLVKEAGLNVTTSHSPAAPGEQGF
O43242_153	PFLEEPMDTEADLQFRPRTGKAASTPLLPEVEAYLQLLVVI
O43242_16	XXXXXMKQEGSARRRGADKAKPPPGGGEQEPPPPPAPQDVE
O43242_209	DDLMQKISTQNRRALDLVAAKCYYYHARVYEFLDKLDVVRS
O43242_223	LDLVAAKCYYYHARVYEFLDKLDVVRSFLHARLRTATLRHD
O43242_269	TLLNLLLRNYLHYSLYDQAEKLVSKSVFPEQANNNEWARYL
O43242_296	FPEQANNNEWARYLYYTGRIKAIQLEYSEARRTMTNALRKA
O43242_325	ARRTMTNALRKAPQHTAVGFKQTVHKLLIVVELLLGEIPDR
O43242_330	TNALRKAPQHTAVGFKQTVHKLLIVVELLLGEIPDRLQFRQ
O43242_385	QAVRTGNLAKFNQVLDQFGEKFQADGTYTLIIRLRHNVIKT
O43242_404	EKFQADGTYTLIIRLRHNVIKTGVRMISLSYSRISLADIAQ
O43242_455	EFIVAKAIRDGVIEASINHEKGYVQSKEMIDIYSTREPQLA
O43242_461	AIRDGVIEASINHEKGYVQSKEMIDIYSTREPQLAFHQRIS
O43242_503	CLDIHNMSVKAMRFPPKSYNKDLESAEERREREQQDLEFAK
O43242_523	KDLESAEERREREQQDLEFAKEMAEDDDDSFPXXXXXXXXX
O43242_80	AEHSQRELDTVTLEDIKEHVKQLEKAVSGKEPRFVLRALRM
O43242_84	QRELDTVTLEDIKEHVKQLEKAVSGKEPRFVLRALRMLPST
O43248_219	AEAEEENTNPSSSGSAHSVAKEPAKGAAPNAPRTRKKRCPY
O43248_234	AHSVAKEPAKGAAPNAPRTRKKRCPYSKFQIRELEREFFFN
O43248_235	HSVAKEPAKGAAPNAPRTRKKRCPYSKFQIRELEREFFFNV
O43248_259	YSKFQIRELEREFFFNVYINKEKRLQLSRMLNLTDRQVKIW
O43248_261	KFQIRELEREFFFNVYINKEKRLQLSRMLNLTDRQVKIWFQ
O43248_277	INKEKRLQLSRMLNLTDRQVKIWFQNRRMKEKKLSRDRLQY
O43248_286	SRMLNLTDRQVKIWFQNRRMKEKKLSRDRLQYFSGNPLLXX
O43248_289	LNLTDRQVKIWFQNRRMKEKKLSRDRLQYFSGNPLLXXXXX
O43290_142	ETNKLRAKLGLKPLEVNAIKKEAGTKEEPVTADVINPMALR
O43290_170	PVTADVINPMALRQREELREKLAAAKEKRLLNQKLGKIKTL
O43290_186	ELREKLAAAKEKRLLNQKLGKIKTLGEDDPWLDDTAAWIER
O43290_219	DTAAWIERSRQLQKEKDLAEKRAKLLEEMDQEFGVSTLVEE
O43290_308	VLVNVNLVDKERAEKNVELRKKKPDYLPYAEDESVDDLAQQ
O43290_309	LVNVNLVDKERAEKNVELRKKKPDYLPYAEDESVDDLAQQK
O43290_310	VNVNLVDKERAEKNVELRKKKPDYLPYAEDESVDDLAQQKP
O43290_401	TVGPRLASEYLTPEEMVTFKKTKRRVKKIRKKEKEVVVRAD
O43290_407	ASEYLTPEEMVTFKKTKRRVKKIRKKEKEVVVRADDLLPLG
O43290_411	LTPEEMVTFKKTKRRVKKIRKKEKEVVVRADDLLPLGDQTQ
O43290_501	APPPGSPQVLEEDEAELELQKQLEKGRRLRQLQQLQQLRDS
O43290_505	GSPQVLEEDEAELELQKQLEKGRRLRQLQQLQQLRDSGEKV
O43290_54	EHKKHKHRSGGSGGSGGERRKRSRERGGERGSGRRGAEAEA
O43290_701	IDDKYSRREEYRGFTQDFKEKDGYKPDVKIEYVDETGRKLT
O43290_736	TGRKLTPKEAFRQLSHRFHGKGSGKMKTERRMKKLDEEALL
O43290_777	KKMSSSDTPLGTVALLQEKQKAQKTPYIVLSGSGKSMNANT
O43296_204	SHNSCESGKDPMIQEEENNFKCSECGKVFNKKHLLAGHEKI
O43296_214	PMIQEEENNFKCSECGKVFNKKHLLAGHEKIHSGVKPYECT
O43296_25	VLTDRAQVSVTFDDVAVTFTKEEWGQLDLAQRTLYQEVMLE
O43296_592	VGRPFTSGQTSVTLRELLLGKDFLNVTTEANILPEETSSSA
O43298_22	EPGTNSFRVEFPDFSSTILQKLNQQRQQGQLCDVSIVVQGH
O43298_296	VQTEHTVQPSGVEEDFHIGEKKVEAEFDEQADESNYDEQVD
O43298_371	IEMVTGIKEEASHLGFSATDKLYPCQCGKSFTHKSQRDRHM
O43298_379	EEASHLGFSATDKLYPCQCGKSFTHKSQRDRHMSMHLGLRP
O43298_408	DRHMSMHLGLRPYGCGVCGKKFKMKHHLVGHMKIHTGIKPY
O43298_65	RAHKAVLAASSPYFCDQVLLKNSRRIVLPDVMNPRVFENIL
O43309_154	QVSVHTGEQEMFLQETVRLRKEGEPSMSLQSMKAQPKYESP
O43309_166	LQETVRLRKEGEPSMSLQSMKAQPKYESPELESQQEQVLDV
O43309_208	TGNEYGNLKQEVSEEMEPHGKTSSKFENDMSKSARCGETRE
O43309_244	GETREPEEITEEPSACSREDKQPTCDENGVSLTENSDHTEH
O43309_571	KPYQCDECGKAFRQRKKTSYKEILLKNHSEPQAGVNLLLSS
O43309_576	DECGKAFRQRKKTSYKEILLKNHSEPQAGVNLLLSSLIPEW
O43309_82	EALSRLRELCHQWLRPETHTKEQILELLVLEQFLTILPEEL
O43361_129	QGLYTCAAEHDLHQKEQIREKLTRSDEWRPSFVNHSAHVGE
O43361_216	FNSSQGGKDFCHQHGLFEHQKTHNGERPYEFSECGELFRYN
O43361_539	AFVRKSHLVQHEKIHTDAFSKRSDLIQHKRIDLRPRPYVCS
O43361_54	SNVMLENFALLSSVGCWHGAKDEEVPSKQCVSVRVLQVTIP
O43361_743	PFKLRECGKDFNKCNTGQRQKTHTGERSYECGESSKVFKYN
O43361_75	DEEVPSKQCVSVRVLQVTIPKPALSTLKAQPCKMCSSILKD
O43390_103	FKESDLSHVQNKSAFLCGVMKTYRQREKQGSKVQESTKGPD
O43390_114	KSAFLCGVMKTYRQREKQGSKVQESTKGPDEAKIKALLERT
O43390_146	KIKALLERTGYTLDVTTGQRKYGGPPPDSVYSGVQPGIGTE
O43390_187	VFVGKIPRDLYEDELVPLFEKAGPIWDLRLMMDPLSGQNRG
O43390_224	QNRGYAFITFCGKEAAQEAVKLCDSYEIRPGKHLGVCISVA
O43390_235	GKEAAQEAVKLCDSYEIRPGKHLGVCISVANNRLFVGSIPK
O43390_257	LGVCISVANNRLFVGSIPKNKTKENILEEFSKVTEGLVDVI
O43390_268	LFVGSIPKNKTKENILEEFSKVTEGLVDVILYHQPDDKKKN
O43390_285	EFSKVTEGLVDVILYHQPDDKKKNRGFCFLEYEDHKSAAQA
O43390_31	QLKEEEEPMDTSSVTHTEHYKTLIEAGLPQKVAERLDEIFQ
O43390_315	EYEDHKSAAQARRRLMSGKVKVWGNVVTVEWADPVEEPDPE
O43390_341	VTVEWADPVEEPDPEVMAKVKVLFVRNLATTVTEEILEKSF
O43390_372	VTEEILEKSFSEFGKLERVKKLKDYAFVHFEDRGAAVKAMD
O43390_41	TSSVTHTEHYKTLIEAGLPQKVAERLDEIFQTGLVAYVDLD
O43390_415	NGKEIEGEEIEIVLAKPPDKKRKERQAARQASRSTAYEDYY
O43390_417	KEIEGEEIEIVLAKPPDKKRKERQAARQASRSTAYEDYYYH
O43390_574	RGRGSRGSRGNRGGNVGGKRKADGYNQPDSKRRQTNNQQNW
O43390_633	NYGYNNDNQEFYQDTYGQQWKXXXXXXXXXXXXXXXXXXXX
O43390_84	AIDALREFNEEGALSVLQQFKESDLSHVQNKSAFLCGVMKT
O43390_94	EGALSVLQQFKESDLSHVQNKSAFLCGVMKTYRQREKQGSK
O43395_110	ELKEVFGDDSEISKESSGVKKRRIPRFEEVEEEPEVIPGPP
O43395_143	PEVIPGPPSESPGMLTKLQIKQMMEAATRQIEERKKQLSFI
O43395_157	LTKLQIKQMMEAATRQIEERKKQLSFISPPTPQPKTPSSSQ
O43395_158	TKLQIKQMMEAATRQIEERKKQLSFISPPTPQPKTPSSSQP
O43395_171	RQIEERKKQLSFISPPTPQPKTPSSSQPERLPIGNTIQPSQ
O43395_20	XMALSKRELDELKPWIEKTVKRVLGFSEPTVVTAALNCVGK
O43395_202	PIGNTIQPSQAATFMNDAIEKARKAAELQARIQAQLALKPG
O43395_205	NTIQPSQAATFMNDAIEKARKAAELQARIQAQLALKPGLIG
O43395_220	IEKARKAAELQARIQAQLALKPGLIGNANMVGLANLHAMGI
O43395_282	GRTVDATGKEIELTHRMPTLKANIRAVKREQFKQQLKEKPS
O43395_298	MPTLKANIRAVKREQFKQQLKEKPSEDMESNTFFDPRVSIA
O43395_300	TLKANIRAVKREQFKQQLKEKPSEDMESNTFFDPRVSIAPS
O43395_328	NTFFDPRVSIAPSQRQRRTFKFHDKGKFEKIAQRLRTKAQL
O43395_332	DPRVSIAPSQRQRRTFKFHDKGKFEKIAQRLRTKAQLEKLQ
O43395_337	IAPSQRQRRTFKFHDKGKFEKIAQRLRTKAQLEKLQAEISQ
O43395_345	RTFKFHDKGKFEKIAQRLRTKAQLEKLQAEISQAARKTGIH
O43395_380	RKTGIHTSTRLALIAPKKELKEGDIPEIEWWDSYIIPNGFD
O43395_40	KRVLGFSEPTVVTAALNCVGKGMDKKKAADHLKPFLDDSTL
O43395_443	QLNPPVDNDTPVTLGVYLTKKEQKKLRRQTRREAQKELQEK
O43395_446	PPVDNDTPVTLGVYLTKKEQKKLRRQTRREAQKELQEKVRL
O43395_45	FSEPTVVTAALNCVGKGMDKKKAADHLKPFLDDSTLRFVDK
O43395_46	SEPTVVTAALNCVGKGMDKKKAADHLKPFLDDSTLRFVDKL
O43395_506	GTEAVQDPTKVEAHVRAQMAKRQKAHEEANAARKLTAEQRK
O43395_509	AVQDPTKVEAHVRAQMAKRQKAHEEANAARKLTAEQRKVKK
O43395_519	HVRAQMAKRQKAHEEANAARKLTAEQRKVKKIKKLKEDISQ
O43395_526	KRQKAHEEANAARKLTAEQRKVKKIKKLKEDISQGVHISVY
O43395_529	KAHEEANAARKLTAEQRKVKKIKKLKEDISQGVHISVYRVR
O43395_531	HEEANAARKLTAEQRKVKKIKKLKEDISQGVHISVYRVRNL
O43395_532	EEANAARKLTAEQRKVKKIKKLKEDISQGVHISVYRVRNLS
O43395_534	ANAARKLTAEQRKVKKIKKLKEDISQGVHISVYRVRNLSNP
O43395_557	ISQGVHISVYRVRNLSNPAKKFKIEANAGQLYLTGVVVLHK
O43395_592	VVVLHKDVNVVVVEGGPKAQKKFKRLMLHRIKWDEQTSNTK
O43395_593	VVLHKDVNVVVVEGGPKAQKKFKRLMLHRIKWDEQTSNTKG
O43395_595	LHKDVNVVVVEGGPKAQKKFKRLMLHRIKWDEQTSNTKGDD
O43395_603	VVEGGPKAQKKFKRLMLHRIKWDEQTSNTKGDDDEESDEEA
O43395_612	KKFKRLMLHRIKWDEQTSNTKGDDDEESDEEAVKKTNKCVL
O43395_626	EQTSNTKGDDDEESDEEAVKKTNKCVLVWEGTAKDRSFGEM
O43395_629	SNTKGDDDEESDEEAVKKTNKCVLVWEGTAKDRSFGEMKFK
O43395_639	SDEEAVKKTNKCVLVWEGTAKDRSFGEMKFKQCPTENMARE
O43395_65	KKAADHLKPFLDDSTLRFVDKLFEAVEEGRSSRHSKSSSDR
O43395_80	LRFVDKLFEAVEEGRSSRHSKSSSDRSRKRELKEVFGDDSE
O43439_118	TSSALTNQQLPATCGARQLSKLKRFLTTLQQFGNDISPEIG
O43439_120	SALTNQQLPATCGARQLSKLKRFLTTLQQFGNDISPEIGEK
O43439_179	HCKLQEATNFPLRPFVIPFLKANLPLLQRELLHCARAAKQT
O43439_197	FLKANLPLLQRELLHCARAAKQTPSQYLAQHEHLLLNTSIA
O43439_234	TSIASPADSSELLMEVHGNGKRPSPERREENSFDRDTIAPE
O43439_25	SGISLKEIQVLARQWKVGPEKRVPAMPGSPVEVKIQSRSSP
O43439_310	PLQHYTLEDIATSHLYREPNKMLEHREVRDRHHSLGLNGGY
O43439_349	GYQDELVDHRLTEREWADEWKHLDHALNCIMEMVEKTRRSM
O43439_387	RSMAVLRRCQESDREELNYWKRRYNENTELRKTGTELVSRQ
O43439_439	DSQREFNSRPGTGYVPVEFWKKTEEAVNKVKIQAMSEVQKA
O43439_440	SQREFNSRPGTGYVPVEFWKKTEEAVNKVKIQAMSEVQKAV
O43439_466	NKVKIQAMSEVQKAVAEAEQKAFEVIATERARMEQTIADVK
O43439_486	KAFEVIATERARMEQTIADVKRQAAEDAFLVINEQEESTEN
O43439_513	AFLVINEQEESTENCWNCGRKASETCSGCNIARYCGSFCQH
O43439_534	ASETCSGCNIARYCGSFCQHKDWERHHRLCGQNLHGQSPHG
O43491_100	PWLKKQKSYTLVVAKDGGDKKEPTQAVVEEQVLDKEEPLPE
O43491_114	KDGGDKKEPTQAVVEEQVLDKEEPLPEEQRQAKGDAEEMAQ
O43491_136	EPLPEEQRQAKGDAEEMAQKKQEIKVEVKEEKPSVSKEEKP
O43491_147	GDAEEMAQKKQEIKVEVKEEKPSVSKEEKPSVSKVEMQPTE
O43491_171	SKEEKPSVSKVEMQPTELVSKEREEKVKETQEDKLEGGAAK
O43491_178	VSKVEMQPTELVSKEREEKVKETQEDKLEGGAAKRETKEVQ
O43491_206	EGGAAKRETKEVQTNELKAEKASQKVTKKTKTVQCKVTLLD
O43491_210	AKRETKEVQTNELKAEKASQKVTKKTKTVQCKVTLLDGTEY
O43491_221	ELKAEKASQKVTKKTKTVQCKVTLLDGTEYSCDLEKHAKGQ
O43491_239	QCKVTLLDGTEYSCDLEKHAKGQVLFDKVCEHLNLLEKDYF
O43491_246	DGTEYSCDLEKHAKGQVLFDKVCEHLNLLEKDYFGLLFQES
O43491_26	GSVSEVKKDSSQLGTDATKEKPKEVAENQQNQSSDPEEEKG
O43491_270	HLNLLEKDYFGLLFQESPEQKNWLDPAKEIKRQLRNLPWLF
O43491_295	PAKEIKRQLRNLPWLFTFNVKFYPPDPSQLTEDITRYFLCL
O43491_380	EFQFAPTQTKELEEKVAELHKTHRGLSPAQADSQFLENAKR
O43491_412	SQFLENAKRLSMYGVDLHHAKDSEGVDIKLGVCANGLLIYK
O43491_420	RLSMYGVDLHHAKDSEGVDIKLGVCANGLLIYKDRLRINRF
O43491_444	CANGLLIYKDRLRINRFAWPKILKISYKRSNFYIKVRPAEL
O43491_447	GLLIYKDRLRINRFAWPKILKISYKRSNFYIKVRPAELEQF
O43491_45	EKPKEVAENQQNQSSDPEEEKGSQPPPAAESQSSLRRQKRE
O43491_458	NRFAWPKILKISYKRSNFYIKVRPAELEQFESTIGFKLPNH
O43491_482	AELEQFESTIGFKLPNHRAAKRLWKVCVEHHTFYRLVSPEQ
O43491_505	WKVCVEHHTFYRLVSPEQPPKAKFLTLGSKFRYSGRTQAQT
O43491_507	VCVEHHTFYRLVSPEQPPKAKFLTLGSKFRYSGRTQAQTRQ
O43491_514	FYRLVSPEQPPKAKFLTLGSKFRYSGRTQAQTRQASTLIDR
O43491_565	KRVSRSLDGAPIGVMDQSLMKDFPGAAGEISAYGPGLVSIA
O43491_601	LVSIAVVQDGDGRREVRSPTKAPHLQLIEGKKNSLRVEGDN
O43491_611	DGRREVRSPTKAPHLQLIEGKKNSLRVEGDNIYVRHSNLML
O43491_612	GRREVRSPTKAPHLQLIEGKKNSLRVEGDNIYVRHSNLMLE
O43491_636	RVEGDNIYVRHSNLMLEELDKAQEDILKHQASISELKRNFM
O43491_643	YVRHSNLMLEELDKAQEDILKHQASISELKRNFMESTPEPR
O43491_66	GSQPPPAAESQSSLRRQKREKETSESRGISRFIPPWLKKQK
O43491_693	TPLSLQTQGSSHETLNIVEEKKRAEVGKDERVITEEMNGKE
O43491_694	PLSLQTQGSSHETLNIVEEKKRAEVGKDERVITEEMNGKEI
O43491_700	QGSSHETLNIVEEKKRAEVGKDERVITEEMNGKEISPGSGP
O43491_712	EKKRAEVGKDERVITEEMNGKEISPGSGPGEIRKVEPVTQK
O43491_725	ITEEMNGKEISPGSGPGEIRKVEPVTQKDSTSLSSESSSSS
O43491_732	KEISPGSGPGEIRKVEPVTQKDSTSLSSESSSSSSESEEED
O43491_822	QAGASVITVETVIQENVGAQKIPGEKSVHEGALKQDMGEEA
O43491_827	VITVETVIQENVGAQKIPGEKSVHEGALKQDMGEEAEEEPQ
O43491_83	KREKETSESRGISRFIPPWLKKQKSYTLVVAKDGGDKKEPT
O43491_84	REKETSESRGISRFIPPWLKKQKSYTLVVAKDGGDKKEPTQ
O43491_874	SHVDIDVLPQIICCSEPPVVKTEMVTISDASQRTEISTKEV
O43491_892	VVKTEMVTISDASQRTEISTKEVPIVQTETKTITYESPQID
O43491_902	DASQRTEISTKEVPIVQTETKTITYESPQIDGGAGGDSGTL
O43491_94	ISRFIPPWLKKQKSYTLVVAKDGGDKKEPTQAVVEEQVLDK
O43491_99	PPWLKKQKSYTLVVAKDGGDKKEPTQAVVEEQVLDKEEPLP
O43491_995	AIREAREQHPDMSVTRVVVHKETELAEEGEDXXXXXXXXXX
O43513_104	SILINFLDLLDILIRSPGSIKREEKLEDLKLLFVHVHHLIN
O43513_108	NFLDLLDILIRSPGSIKREEKLEDLKLLFVHVHHLINEYRP
O43513_143	INEYRPHQARETLRVMMEVQKRQRLETAERFQKHLERVIEM
O43513_19	XXMGEPQQVSALPPPPMQYIKEYTDENIQEGLAPKPPPPIK
O43513_33	PPMQYIKEYTDENIQEGLAPKPPPPIKDSYMMFGNQFQCDD
O43513_75	IIRPLESQGIERLHPMQFDHKKELRKLNMSILINFLDLLDI
O43513_80	ESQGIERLHPMQFDHKKELRKLNMSILINFLDLLDILIRSP
O43719_119	EPPQEKAPEPTDARKKGEKRKAESGWFHVEEDRNTNVYVSG
O43719_190	VKLYKDNQGNLKGDGLCCYLKRESVELALKLLDEDEIRGYK
O43719_199	NLKGDGLCCYLKRESVELALKLLDEDEIRGYKLHVEVAKFQ
O43719_217	ALKLLDEDEIRGYKLHVEVAKFQLKGEYDASKKKKKCKDYK
O43719_228	GYKLHVEVAKFQLKGEYDASKKKKKCKDYKKKLSMQQKQLD
O43719_230	KLHVEVAKFQLKGEYDASKKKKKCKDYKKKLSMQQKQLDWR
O43719_232	HVEVAKFQLKGEYDASKKKKKCKDYKKKLSMQQKQLDWRPE
O43719_234	EVAKFQLKGEYDASKKKKKCKDYKKKLSMQQKQLDWRPERR
O43719_237	KFQLKGEYDASKKKKKCKDYKKKLSMQQKQLDWRPERRAGP
O43719_303	VLNEIREDLRVECSKFGQIRKLLLFDRHPDGVASVSFRDPE
O43719_450	KFEKTEDGGEFEEGASENNAKESSPEKEAEEGCPEKESEEG
O43719_465	SENNAKESSPEKEAEEGCPEKESEEGCPKRGFEGSCSQKES
O43719_473	SPEKEAEEGCPEKESEEGCPKRGFEGSCSQKESEEGNPVRG
O43719_500	CSQKESEEGNPVRGSEEDSPKKESKKKTLKNDCEENGLAKE
O43719_501	SQKESEEGNPVRGSEEDSPKKESKKKTLKNDCEENGLAKES
O43719_505	SEEGNPVRGSEEDSPKKESKKKTLKNDCEENGLAKESEDDL
O43719_506	EEGNPVRGSEEDSPKKESKKKTLKNDCEENGLAKESEDDLN
O43719_509	NPVRGSEEDSPKKESKKKTLKNDCEENGLAKESEDDLNKES
O43719_527	TLKNDCEENGLAKESEDDLNKESEEEVGPTKESEEDDSEKE
O43719_537	LAKESEDDLNKESEEEVGPTKESEEDDSEKESDEDCSEKQS
O43719_572	CSEKQSEDGSEREFEENGLEKDLDEEGSEKELHENVLDKEL
O43719_581	SEREFEENGLEKDLDEEGSEKELHENVLDKELEENDSENSE
O43719_62	GQQPTDTPYEWDLDKKAWFPKITEDFIATYQANYGFSNDGA
O43719_662	SDEKEDEEYADEKGLEAADKKAEEGDADEKLFEESDDKEDE
O43719_687	DADEKLFEESDDKEDEDADGKEVEDADEKLFEDDDSNEKLF
O43719_705	DGKEVEDADEKLFEDDDSNEKLFDEEEDSSEKLFDDSDERG
O43795_1002	AIEEKIIIAEVVNKINRANGKSTSRIFLLTNNNLLLADQKS
O43795_1036	LLADQKSGQIKSEVPLVDVTKVSMSSQNDGFFAVHLKEGSE
O43795_1052	VDVTKVSMSSQNDGFFAVHLKEGSEAASKGDFLFSSDHLIE
O43795_1060	SSQNDGFFAVHLKEGSEAASKGDFLFSSDHLIEMATKLYRT
O43795_1076	EAASKGDFLFSSDHLIEMATKLYRTTLSQTKQKLNIEISDE
O43795_1086	SSDHLIEMATKLYRTTLSQTKQKLNIEISDEFLVQFRQDKV
O43795_1105	TKQKLNIEISDEFLVQFRQDKVCVKFIQGNQKNGSVPTCKR
O43795_1109	LNIEISDEFLVQFRQDKVCVKFIQGNQKNGSVPTCKRKNNR
O43795_1116	EFLVQFRQDKVCVKFIQGNQKNGSVPTCKRKNNRLLEVAVP
O43795_119	DKDQCILITGESGAGKTEASKLVMSYVAAVCGKGAEVNQVK
O43795_131	GAGKTEASKLVMSYVAAVCGKGAEVNQVKEQLLQSNPVLEA
O43795_139	KLVMSYVAAVCGKGAEVNQVKEQLLQSNPVLEAFGNAKTVR
O43795_156	NQVKEQLLQSNPVLEAFGNAKTVRNDNSSRFGKYMDIEFDF
O43795_168	VLEAFGNAKTVRNDNSSRFGKYMDIEFDFKGDPLGGVISNY
O43795_197	KGDPLGGVISNYLLEKSRVVKQPRGERNFHVFYQLLSGASE
O43795_222	ERNFHVFYQLLSGASEELLNKLKLERDFSRYNYLSLDSAKV
O43795_241	NKLKLERDFSRYNYLSLDSAKVNGVDDAANFRTVRNAMQIV
O43795_303	NIEFKPESRVNGLDESKIKDKNELKEICELTGIDQSVLERA
O43795_307	KPESRVNGLDESKIKDKNELKEICELTGIDQSVLERAFSFR
O43795_332	LTGIDQSVLERAFSFRTVEAKQEKVSTTLNVAQAYYARDAL
O43795_380	LFSWLVNRINESIKAQTKVRKKVMGVLDIYGFEIFEDNSFE
O43795_381	FSWLVNRINESIKAQTKVRKKVMGVLDIYGFEIFEDNSFEQ
O43795_410	GFEIFEDNSFEQFIINYCNEKLQQIFIELTLKEEQEEYIRE
O43795_421	QFIINYCNEKLQQIFIELTLKEEQEEYIREDIEWTHIDYFN
O43795_478	AMLDEECLRPGTVTDETFLEKLNQVCATHQHFESRMSKCSR
O43795_529	CFRIQHYAGKVLYQVEGFVDKNNDLLYRDLSQAMWKASHAL
O43795_551	NDLLYRDLSQAMWKASHALIKSLFPEGNPAKINLKRPPTAG
O43795_561	AMWKASHALIKSLFPEGNPAKINLKRPPTAGSQFKASVATL
O43795_565	ASHALIKSLFPEGNPAKINLKRPPTAGSQFKASVATLMKNL
O43795_583	NLKRPPTAGSQFKASVATLMKNLQTKNPNYIRCIKPNDKKA
O43795_602	MKNLQTKNPNYIRCIKPNDKKAAHIFNEALVCHQIRYLGLL
O43795_650	AGYAFRQAYEPCLERYKMLCKQTWPHWKGPARSGVEVLFNE
O43795_657	AYEPCLERYKMLCKQTWPHWKGPARSGVEVLFNELEIPVEE
O43795_684	VEVLFNELEIPVEEYSFGRSKIFIRNPRTLFKLEDLRKQRL
O43795_695	VEEYSFGRSKIFIRNPRTLFKLEDLRKQRLEDLATLIQKIY
O43795_701	GRSKIFIRNPRTLFKLEDLRKQRLEDLATLIQKIYRGWKCR
O43795_713	LFKLEDLRKQRLEDLATLIQKIYRGWKCRTHFLLMKKSQIV
O43795_719	LRKQRLEDLATLIQKIYRGWKCRTHFLLMKKSQIVIAAWYR
O43795_728	ATLIQKIYRGWKCRTHFLLMKKSQIVIAAWYRRYAQQKRYQ
O43795_729	TLIQKIYRGWKCRTHFLLMKKSQIVIAAWYRRYAQQKRYQQ
O43795_751	QIVIAAWYRRYAQQKRYQQTKSSALVIQSYIRGWKARKILR
O43795_768	QQTKSSALVIQSYIRGWKARKILRELKHQKRCKEAVTTIAA
O43795_777	IQSYIRGWKARKILRELKHQKRCKEAVTTIAAYWHGTQARR
O43795_803	VTTIAAYWHGTQARRELRRLKEEARNKHAIAVIWAYWLGSK
O43795_809	YWHGTQARRELRRLKEEARNKHAIAVIWAYWLGSKARRELK
O43795_829	KHAIAVIWAYWLGSKARRELKRLKEEARRKHAVAVIWAYWL
O43795_852	KEEARRKHAVAVIWAYWLGLKVRREYRKFFRANAGKKIYEF
O43795_867	YWLGLKVRREYRKFFRANAGKKIYEFTLQRIVQKYFLEMKN
O43795_880	FFRANAGKKIYEFTLQRIVQKYFLEMKNKMPSLSPIDKNWP
O43795_886	GKKIYEFTLQRIVQKYFLEMKNKMPSLSPIDKNWPSRPYLF
O43795_897	IVQKYFLEMKNKMPSLSPIDKNWPSRPYLFLDSTHKELKRI
O43795_912	LSPIDKNWPSRPYLFLDSTHKELKRIFHLWRCKKYRDQFTD
O43795_915	IDKNWPSRPYLFLDSTHKELKRIFHLWRCKKYRDQFTDQQK
O43795_935	KRIFHLWRCKKYRDQFTDQQKLIYEEKLEASELFKDKKALY
O43795_951	TDQQKLIYEEKLEASELFKDKKALYPSSVGQPFQGAYLEIN
O43795_952	DQQKLIYEEKLEASELFKDKKALYPSSVGQPFQGAYLEINK
O43795_972	KALYPSSVGQPFQGAYLEINKNPKYKKLKDAIEEKIIIAEV
O43795_975	YPSSVGQPFQGAYLEINKNPKYKKLKDAIEEKIIIAEVVNK
O43795_977	SSVGQPFQGAYLEINKNPKYKKLKDAIEEKIIIAEVVNKIN
O43795_978	SVGQPFQGAYLEINKNPKYKKLKDAIEEKIIIAEVVNKINR
O43795_980	GQPFQGAYLEINKNPKYKKLKDAIEEKIIIAEVVNKINRAN
O43795_995	KYKKLKDAIEEKIIIAEVVNKINRANGKSTSRIFLLTNNNL
O43818_166	QLSITCLVVTPDDSAIFSAAKDCSIIKWSVESGRKLHVIPR
O43818_188	CSIIKWSVESGRKLHVIPRAKKGAEGKPPGHSSHVLCMAIS
O43818_221	HVLCMAISSDGKYLASGDRSKLILIWEAQSCQHLYTFTGHR
O43818_25	AAARKRGKPASGAGAGAGAGKRRRKADSAGDRGKSKGGGKM
O43818_29	KRGKPASGAGAGAGAGKRRRKADSAGDRGKSKGGGKMNEEI
O43818_311	ALSRECCVTAGGRDGTVRVWKIPEESQLVFYGHQGSIDCIH
O43818_354	NEEHMVSGADDGSVALWGLSKKRPLALQREAHGLRGEPGLE
O43818_38	GAGAGAGKRRRKADSAGDRGKSKGGGKMNEEISSDSESESL
O43818_40	GAGAGKRRRKADSAGDRGKSKGGGKMNEEISSDSESESLAP
O43818_428	GFRQLDLLCDIPLVGFINSLKFSSSGDFLVAGVGQEHRLGR
O43818_44	GKRRRKADSAGDRGKSKGGGKMNEEISSDSESESLAPRKPE
O43818_79	APRKPEEEEEEELEETAQEKKLRLAKLYLEQLRQQEEEKAE
O43823_289	STMPYGCGRSQPRMRDRDRPKRRGFDRFGPDGTGRKRKQFQ
O43823_304	DRDRPKRRGFDRFGPDGTGRKRKQFQLYEEPDTKLARVDSE
O43823_369	ELCDSGRQRGEKEDEDEDVKKRREKQRRRDRTRDRAADRIQ
O43823_373	SGRQRGEKEDEDEDVKKRREKQRRRDRTRDRAADRIQFACS
O43823_396	RRDRTRDRAADRIQFACSVCKFRSFDDEEIQKHLQSKFHKE
O43823_412	CSVCKFRSFDDEEIQKHLQSKFHKETLRFISTKLPDKTVEF
O43823_428	HLQSKFHKETLRFISTKLPDKTVEFLQEYIVNRNKKIEKRR
O43823_446	PDKTVEFLQEYIVNRNKKIEKRRQELMEKETAKPKPDPFKG
O43823_458	VNRNKKIEKRRQELMEKETAKPKPDPFKGIGQEHFFKKIEA
O43823_474	KETAKPKPDPFKGIGQEHFFKKIEAAHCLACDMLIPAQPQL
O43823_516	QRHLHSVDHNHNRRLAAEQFKKTSLHVAKSVLNNRHIVKML
O43823_524	HNHNRRLAAEQFKKTSLHVAKSVLNNRHIVKMLEKYLKGED
O43823_538	TSLHVAKSVLNNRHIVKMLEKYLKGEDPFTSETVDPEMEGD
O43823_62	NTSVTTGATYSYGPASWEAAKANDGGLAAGAPAMHMASYGP
O43823_637	SDPQAEQLLEEQVPCGTAHEKGVPKARSEAAEAGNGAETMA
O43823_686	RVAPAPAAADAEVEQTDAESKDAVPTEXXXXXXXXXXXXXX
O43829_122	KEDVNLMMSSGQILGIRFLDKLCSQKRDVSSPDENNGQSKS
O43829_127	LMMSSGQILGIRFLDKLCSQKRDVSSPDENNGQSKSKYCLK
O43829_141	DKLCSQKRDVSSPDENNGQSKSKYCLKINRPIGDAADTQDD
O43829_143	LCSQKRDVSSPDENNGQSKSKYCLKINRPIGDAADTQDDDV
O43829_147	KRDVSSPDENNGQSKSKYCLKINRPIGDAADTQDDDVEEIG
O43829_19	XXMEFFISMSETIKYNDDDHKTLFLKTLNEQRLEGEFCDIA
O43829_212	TTTLRVQEAILKELGSEEVRKVNCYGQEVESMETPESKDLG
O43829_229	EVRKVNCYGQEVESMETPESKDLGSQTPQALTFNDGMSEVK
O43829_284	KFEYLLYGHHREQIACQACGKTFSDEGRLRKHEKLHTADRP
O43829_62	VEDVKFRAHRCVLAACSTYFKKLFKKLEVDSSSVIEIDFLR
O43829_63	EDVKFRAHRCVLAACSTYFKKLFKKLEVDSSSVIEIDFLRS
O43829_66	KFRAHRCVLAACSTYFKKLFKKLEVDSSSVIEIDFLRSDIF
O43829_97	EIDFLRSDIFEEVLNYMYTAKISVKKEDVNLMMSSGQILGI
O60216_16	XXXXXMFYAHFVLSKRGPLAKIWLAAHWDKKLTKAHVFECN
O60216_25	HFVLSKRGPLAKIWLAAHWDKKLTKAHVFECNLESSVESII
O60216_26	FVLSKRGPLAKIWLAAHWDKKLTKAHVFECNLESSVESIIS
O60216_314	TTLVPNEEEAFALEPIDITVKETKAKRKRKLIVDSVKELDS
O60216_321	EEAFALEPIDITVKETKAKRKRKLIVDSVKELDSKTIRAQL
O60216_335	ETKAKRKRKLIVDSVKELDSKTIRAQLSDYSDIVTTLDLAP
O60216_403	NRLLKLFTRCLTPLVPEDLRKRRKGGEADNLDEFLKEFENP
O60216_479	SRTNIDESAMPPPPPQGVKRKAGQIDPEPVMPPQQVEQMEI
O60216_525	PPEEPPNICQLIPELELLPEKEKEKEKEKEDDEEEEDEDAS
O60216_527	EEPPNICQLIPELELLPEKEKEKEKEKEDDEEEEDEDASGG
O60216_531	NICQLIPELELLPEKEKEKEKEKEDDEEEEDEDASGGDQDQ
O60216_558	EEEDEDASGGDQDQEERRWNKRTQQMLHGLQRALAKTGAES
O60216_573	ERRWNKRTQQMLHGLQRALAKTGAESISLLELCRNTNRKQA
O60216_591	LAKTGAESISLLELCRNTNRKQAAAKFYSFLVLKKQQAIEL
O60216_596	AESISLLELCRNTNRKQAAAKFYSFLVLKKQQAIELTQEEP
O60216_84	VRIYHRKAKYLLADCNEAFIKIKMAFRPGVVDLPEENREAA
O60216_86	IYHRKAKYLLADCNEAFIKIKMAFRPGVVDLPEENREAAYN
O60264_1023	TLITLIERENMELEEKEKAEKKKRGPKPSTQKRKMDGAPDG
O60264_1047	GPKPSTQKRKMDGAPDGRGRKKKLKLXXXXXXXXXXXXXXX
O60264_179	SKATNVCTRFEDSPSYVKWGKLRDYQVRGLNWLISLYENGI
O60264_19	XXMSSAAEPPPPPPPESAPSKPAASIASGGSNSSNKGGPEG
O60264_211	LISLYENGINGILADEMGLGKTLQTISLLGYMKHYRNIPGP
O60264_223	LADEMGLGKTLQTISLLGYMKHYRNIPGPHMVLVPKSTLHN
O60264_249	PGPHMVLVPKSTLHNWMSEFKRWVPTLRSVCLIGDKEQRAA
O60264_317	FKKFNWRYLVIDEAHRIKNEKSKLSEIVREFKTTNRLLLTG
O60264_319	KFNWRYLVIDEAHRIKNEKSKLSEIVREFKTTNRLLLTGTP
O60264_34	ESAPSKPAASIASGGSNSSNKGGPEGVAAQAVASAASAGPA
O60264_402	ERLHMVLRPFLLRRIKADVEKSLPPKKEVKIYVGLSKMQRE
O60264_407	VLRPFLLRRIKADVEKSLPPKKEVKIYVGLSKMQREWYTRI
O60264_411	FLLRRIKADVEKSLPPKKEVKIYVGLSKMQREWYTRILMKD
O60264_443	WYTRILMKDIDILNSAGKMDKMRLLNILMQLRKCCNHPYLF
O60264_455	LNSAGKMDKMRLLNILMQLRKCCNHPYLFDGAEPGPPYTTD
O60264_496	MHLVTNSGKMVVLDKLLPKLKEQGSRVLIFSQMTRVLDILE
O60264_552	QTPHDERQDSINAYNEPNSTKFVFMLSTRAGGLGINLATAD
O60264_600	DWNPQVDLQAMDRAHRIGQTKTVRVFRFITDNTVEERIVER
O60264_624	VFRFITDNTVEERIVERAEMKLRLDSIVIQQGRLVDQNLNK
O60264_683	ASKESEITDEDIDGILERGAKKTAEMNEKLSKMGESSLRNF
O60264_69	ASAGPADAEMEEIFDDASPGKQKEIQEPDPTYEEKMQTDRA
O60264_691	DEDIDGILERGAKKTAEMNEKLSKMGESSLRNFTMDTESSV
O60264_787	KQPNVQDFQFFPPRLFELLEKEILFYRKTIGYKVPRNPELP
O60264_794	FQFFPPRLFELLEKEILFYRKTIGYKVPRNPELPNAAQAQK
O60264_859	TQGFTNWNKRDFNQFIKANEKWGRDDIENIAREVEGKTPEE
O60264_918	EKIMAQIERGEARIQRRISIKKALDTKIGRYKAPFHQLRIS
O60264_924	IERGEARIQRRISIKKALDTKIGRYKAPFHQLRISYGTNKG
O60264_943	TKIGRYKAPFHQLRISYGTNKGKNYTEEEDRFLICMLHKLG
O60264_990	YDELRQCIRNSPQFRFDWFLKSRTAMELQRRCNTLITLIER
O60315_1033	SLLRHKYEHTGKRPHQCQICKKAFKHKHHLIEHSRLHSGEK
O60315_1082	KRFSHSGSYSQHMNHRYSYCKREAEEREAAEREAREKGHLE
O60315_1138	PQGYSDSEERESMPRDGESEKEHEKEGEDGYGKLGRQDGDE
O60315_1142	SDSEERESMPRDGESEKEHEKEGEDGYGKLGRQDGDEEFEE
O60315_1202	EEETGDHSMDDSSEDGKMETKSDHEEDNMEDGMXXXXXXXX
O60315_136	DYDTMGPEATIQTAINNGTVKNANCTSDFEEYFAKRKLEER
O60315_150	INNGTVKNANCTSDFEEYFAKRKLEERDGHAVSIEEYLQRS
O60315_16	XXXXXMKQPIMADGPRCKRRKQANPRRKNVVNYDNVVDTGS
O60315_221	PGTPDAFAQLLTCPYCDRGYKRLTSLKEHIKYRHEKNEENF
O60315_231	LTCPYCDRGYKRLTSLKEHIKYRHEKNEENFSCPLCSYTFA
O60315_264	PLCSYTFAYRTQLERHMVTHKPGTDQHQMLTQGAGNRKFKC
O60315_372	SSPNSVSSSPTNSAITQLRNKLENGKPLSMSEQTGLLKIKT
O60315_401	MSEQTGLLKIKTEPLDFNDYKVLMATHGFSGTSPFMNGGLG
O60315_43	KNVVNYDNVVDTGSETDEEDKLHIAEDDGIANPLDQETSPA
O60315_485	QIVDNTVSRQKMDCKAEEISKLKGYHMKDPCSQPEEQGVTS
O60315_487	VDNTVSRQKMDCKAEEISKLKGYHMKDPCSQPEEQGVTSPN
O60315_492	SRQKMDCKAEEISKLKGYHMKDPCSQPEEQGVTSPNIPPVG
O60315_523	VTSPNIPPVGLPVVSHNGATKSIIDYTLEKVNEAKACLQSL
O60315_532	GLPVVSHNGATKSIIDYTLEKVNEAKACLQSLTTDSRRQIS
O60315_537	SHNGATKSIIDYTLEKVNEAKACLQSLTTDSRRQISNIKKE
O60315_556	AKACLQSLTTDSRRQISNIKKEKLRTLIDLVTDDKMIENHN
O60315_587	TDDKMIENHNISTPFSCQFCKESFPGPIPLHQHERYLCKMN
O60315_605	FCKESFPGPIPLHQHERYLCKMNEEIKAVLQPHENIVPNKA
O60315_643	NKAGVFVDNKALLLSSVLSEKGMTSPINPYKDHMSVLKAYY
O60315_660	LSEKGMTSPINPYKDHMSVLKAYYAMNMEPNSDELLKISIA
O60315_676	MSVLKAYYAMNMEPNSDELLKISIAVGLPQEFVKEWFEQRK
O60315_689	PNSDELLKISIAVGLPQEFVKEWFEQRKVYQYSNSRSPSLE
O60315_696	KISIAVGLPQEFVKEWFEQRKVYQYSNSRSPSLERSSKPLA
O60315_724	RSPSLERSSKPLAPNSNPPTKDSLLPRSPVKPMDSITSPSI
O60315_762	PSIAELHNSVTNCDPPLRLTKPSHFTNIKPVEKLDHSRSNT
O60315_834	EPLDLSLPKQMKEPKSIIATKNKTKASSISLDHNSVSSSSE
O60315_836	LDLSLPKQMKEPKSIIATKNKTKASSISLDHNSVSSSSENS
O60315_838	LSLPKQMKEPKSIIATKNKTKASSISLDHNSVSSSSENSDE
O60315_954	HMAYTYPTGAATFADMQQRRKYQRKQGFQGELLDGAQDYMS
O60315_989	AQDYMSGLDDMTDSDSCLSRKKIKKTESGMYACDLCDKTFQ
O60315_990	QDYMSGLDDMTDSDSCLSRKKIKKTESGMYACDLCDKTFQK
O60315_992	YMSGLDDMTDSDSCLSRKKIKKTESGMYACDLCDKTFQKSS
O60341_144	DESLANLSEDEYYSEEERNAKAEKEKKLPPPPPQAPPEEEN
O60341_149	NLSEDEYYSEEERNAKAEKEKKLPPPPPQAPPEEENESEPE
O60341_150	LSEDEYYSEEERNAKAEKEKKLPPPPPQAPPEEENESEPEE
O60341_208	MTSQEAACFPDIISGPQQTQKVFLFIRNRTLQLWLDNPKIQ
O60341_268	LVHRVHSYLERHGLINFGIYKRIKPLPTKKTGKVIIIGSGV
O60341_276	LERHGLINFGIYKRIKPLPTKKTGKVIIIGSGVSGLAAARQ
O60341_322	MDVTLLEARDRVGGRVATFRKGNYVADLGAMVVTGLGGNPM
O60341_357	LGGNPMAVVSKQVNMELAKIKQKCPLYEANGQAVPKEKDEM
O60341_404	RLLEATSYLSHQLDFNVLNNKPVSLGQALEVVIQLQEKHVK
O60341_421	LNNKPVSLGQALEVVIQLQEKHVKDEQIEHWKKIVKTQEEL
O60341_432	LEVVIQLQEKHVKDEQIEHWKKIVKTQEELKELLNKMVNLK
O60341_433	EVVIQLQEKHVKDEQIEHWKKIVKTQEELKELLNKMVNLKE
O60341_436	IQLQEKHVKDEQIEHWKKIVKTQEELKELLNKMVNLKEKIK
O60341_447	QIEHWKKIVKTQEELKELLNKMVNLKEKIKELHQQYKEASE
O60341_456	KTQEELKELLNKMVNLKEKIKELHQQYKEASEVKPPRDITA
O60341_463	ELLNKMVNLKEKIKELHQQYKEASEVKPPRDITAEFLVKSK
O60341_507	LTALCKEYDELAETQGKLEEKLQELEANPPSDVYLSSRDRQ
O60341_585	LTVRNGYSCVPVALAEGLDIKLNTAVRQVRYTASGCEVIAV
O60341_617	ASGCEVIAVNTRSTSQTFIYKCDAVLCTLPLGVLKQQPPAV
O60341_63	GLSGPAEVGPGAVGERTPRKKEPPRASPPGGLAEPPGSAGP
O60341_661	PPLPEWKTSAVQRMGFGNLNKVVLCFDRVFWDPSVNLFGHV
O60481_266	PIKQELSCKWIDEAQLSRPKKSCDRTFSTMHELVTHVTMEH
O60481_307	VGGPEQNNHVCYWEECPREGKSFKAKYKLVNHIRVHTGEKP
O60481_312	QNNHVCYWEECPREGKSFKAKYKLVNHIRVHTGEKPFPCPF
O60481_337	NHIRVHTGEKPFPCPFPGCGKIFARSENLKIHKRTHTGEKP
O60481_408	YICKVCDKSYTHPSSLRKHMKVHESQGSDSSPAASSGYESS
O60481_439	PAASSGYESSTPPAIASANSKDTTKTPSAVQTSTSHNPGLP
O60481_443	SGYESSTPPAIASANSKDTTKTPSAVQTSTSHNPGLPPNFN
O60493_63	RGRFTTYEIRVKTNLPIFKLKESTVRRRYSDFEWLRSELER
O60506_107	HVQNKSAFLCGVMKTYRQREKQGTKVADSSKGPDEAKIKAL
O60506_213	LMMDPLTGLNRGYAFVTFCTKEAAQEAVKLYNNHEIRSGKH
O60506_252	KHIGVCISVANNRLFVGSIPKSKTKEQILEEFSKVTEGLTD
O60506_256	VCISVANNRLFVGSIPKSKTKEQILEEFSKVTEGLTDVILY
O60506_283	FSKVTEGLTDVILYHQPDDKKKNRGFCFLEYEDHKTAAQAR
O60506_284	SKVTEGLTDVILYHQPDDKKKNRGFCFLEYEDHKTAAQARR
O60506_336	NVGTVEWADPIEDPDPEVMAKVKVLFVRNLANTVTEEILEK
O60506_371	EEILEKAFSQFGKLERVKKLKDYAFIHFDERDGAVKAMEEM
O60506_417	EGENIEIVFAKPPDQKRKERKAQRQAAKNQMYDDYYYYGPP
O60506_42	IHSENFQTLLDAGLPQKVAEKLDEIYVAGLVAHSDLDERAI
O60506_66	IYVAGLVAHSDLDERAIEALKEFNEDGALAVLQQFKDSDLS
O60563_168	LTIDHPHTHVVKCTQLVRASKDLAQTSYFMATNSLHLTTFS
O60563_206	TFSLQYTPPVVACVCIHLACKWSNWEIPVSTDGKHWWEYVD
O60563_219	VCIHLACKWSNWEIPVSTDGKHWWEYVDATVTLELLDELTH
O60563_247	ATVTLELLDELTHEFLQILEKTPNRLKRIWNWRACEAAKKT
O60563_265	LEKTPNRLKRIWNWRACEAAKKTKADDRGTDEKTSEQTILN
O60563_266	EKTPNRLKRIWNWRACEAAKKTKADDRGTDEKTSEQTILNM
O60563_380	VDHSLPQDGSNAFISQKQNSKSVPSAKVSLKEYRAKHAEEL
O60563_386	QDGSNAFISQKQNSKSVPSAKVSLKEYRAKHAEELAAQKRQ
O60563_390	NAFISQKQNSKSVPSAKVSLKEYRAKHAEELAAQKRQLENM
O60563_471	FLEKADKTALKMRIPVAGGDKAASSKPEEIKMRIKVHAAAD
O60563_492	AASSKPEEIKMRIKVHAAADKHNSVEDSVTKSREHKEKHKT
O60563_507	HAAADKHNSVEDSVTKSREHKEKHKTHPSNHHHHHNHHSHK
O60563_527	KEKHKTHPSNHHHHHNHHSHKHSHSQLPVGTGNKRPGDPKH
O60563_540	HHNHHSHKHSHSQLPVGTGNKRPGDPKHSSQTSNLAHKTYS
O60563_557	TGNKRPGDPKHSSQTSNLAHKTYSLSSSFSSSSSTRKRGPS
O60563_596	PSEETGGAVFDHPAKIAKSTKSSSLNFSFPSLPTMGQMPGH
O60563_641	SGLSFSQPSCKTRVPHSKLDKGPTGANGHNTTQTIDYQDTV
O60563_93	QSFTQFPGNSVAPAALFLAAKVEEQPKKLEHVIKVAHTCLH
O60563_99	PGNSVAPAALFLAAKVEEQPKKLEHVIKVAHTCLHPQESLP
O60583_121	EHVIKVAHACLHPLEPLLDTKCDAYLQQTQELVILETIMLQ
O60583_252	LLDELTHEFLQILEKTPNRLKKIRNWRANQAARKPKVDGQV
O60583_399	INFQQGPSISLHSGLHHRPDKISDHSSVKQEYTHKAGSSKH
O60583_438	KHHGPISTTPGIIPQKMSLDKYREKRKLETLDLDVRDHYIA
O60583_466	ETLDLDVRDHYIAAQVEQQHKQGQSQAASSSSVTSPIKMKI
O60583_498	VTSPIKMKIPIANTEKYMADKKEKSGSLKLRIPIPPTDKSA
O60583_499	TSPIKMKIPIANTEKYMADKKEKSGSLKLRIPIPPTDKSAS
O60583_524	SLKLRIPIPPTDKSASKEELKMKIKVSSSERHSSSDEGSGK
O60583_544	KMKIKVSSSERHSSSDEGSGKSKHSSPHISRDHKEKHKEHP
O60583_561	GSGKSKHSSPHISRDHKEKHKEHPSSRHHTSSHKHSHSHSG
O60583_574	RDHKEKHKEHPSSRHHTSSHKHSHSHSGSSSGGSKHSADGI
O60583_588	HHTSSHKHSHSHSGSSSGGSKHSADGIPPTVLRSPVGLSSD
O60583_633	SSSSSRKRLHVNDASHNHHSKMSKSSKSSGSSSSSSSSVKQ
O60583_636	SSRKRLHVNDASHNHHSKMSKSSKSSGSSSSSSSSVKQYIS
O60583_652	SKMSKSSKSSGSSSSSSSSVKQYISSHNSVFNHPLPPPPPV
O60583_686	LPPPPPVTYQVGYGHLSTLVKLDKKPVETNGPDANHEYSTS
O60583_689	PPPVTYQVGYGHLSTLVKLDKKPVETNGPDANHEYSTSSQH
O60675_60	HLRGLTKEEVTRLKQRRRTLKNRGYAASCRIKRVTQKEELE
O60675_71	RLKQRRRTLKNRGYAASCRIKRVTQKEELERQRVELQQEVE
O60716_143	VVSVETSDDGTTRRTETTVKKVVKTVTTRTVQPVAMGPDGL
O60716_17	XXXXMDDSEVESTASILASVKEQEAQFEKLTRALEEERRHV
O60716_184	PVDASSVSNNYIQTLGRDFRKNGNGGPGPYVGQAGTATLPR
O60716_383	WRQPELPEVIAMLGFRLDAVKSNAAAYLQHLCYRNDKVKTD
O60716_401	AVKSNAAAYLQHLCYRNDKVKTDVRKLKGIPVLVGLLDHPK
O60716_406	AAAYLQHLCYRNDKVKTDVRKLKGIPVLVGLLDHPKKEVHL
O60716_422	TDVRKLKGIPVLVGLLDHPKKEVHLGACGALKNISFGRDQD
O60716_462	DNKIAIKNCDGVPALVRLLRKARDMDLTEVITGTLWNLSSH
O60716_547	LTNTAGCLRNVSSERSEARRKLRECDGLVDALIFIVQAEIG
O60716_569	RECDGLVDALIFIVQAEIGQKDSDSKLVENCVCLLRNLSYQ
O60716_574	LVDALIFIVQAEIGQKDSDSKLVENCVCLLRNLSYQVHREI
O60716_622	EAAPNVANNTGPHAASCFGAKKGKDEWFSRGKKPIEDPAND
O60716_623	AAPNVANNTGPHAASCFGAKKGKDEWFSRGKKPIEDPANDT
O60716_625	PNVANNTGPHAASCFGAKKGKDEWFSRGKKPIEDPANDTVD
O60716_633	PHAASCFGAKKGKDEWFSRGKKPIEDPANDTVDFPKRTSPA
O60716_648	WFSRGKKPIEDPANDTVDFPKRTSPARGYELLFQPEVVRIY
O60716_673	ARGYELLFQPEVVRIYISLLKESKTPAILEASAGAIQNLCA
O60716_676	YELLFQPEVVRIYISLLKESKTPAILEASAGAIQNLCAGRW
O60716_710	NLCAGRWTYGRYIRSALRQEKALSAIADLLTNEHERVVKAA
O60716_744	ERVVKAASGALRNLAVDARNKELIGKHAIPNLVKNLPGGQQ
O60716_79	TLTRRHQNGRFVGDADLERQKFSDLKLNGPQDHSHLLYSTI
O60716_794	TVISILNTINEVIAENLEAAKKLRETQGIEKLVLINKSGNR
O60716_795	VISILNTINEVIAENLEAAKKLRETQGIEKLVLINKSGNRS
O60716_810	LEAAKKLRETQGIEKLVLINKSGNRSEKEVRAAALVLQTIW
O60716_833	NRSEKEVRAAALVLQTIWGYKELRKPLEKEGWKKSDFQVNL
O60716_837	KEVRAAALVLQTIWGYKELRKPLEKEGWKKSDFQVNLNNAS
O60716_841	AAALVLQTIWGYKELRKPLEKEGWKKSDFQVNLNNASRSQS
O60716_845	VLQTIWGYKELRKPLEKEGWKKSDFQVNLNNASRSQSSHSY
O60716_846	LQTIWGYKELRKPLEKEGWKKSDFQVNLNNASRSQSSHSYD
O60716_878	RSQSSHSYDDSTLPLIDRNQKSDKKPDREEIQMSNMGSNTK
O60716_881	SSHSYDDSTLPLIDRNQKSDKKPDREEIQMSNMGSNTKSLD
O60716_898	KSDKKPDREEIQMSNMGSNTKSLDNNYSTPNERGDHNRTLD
O60716_930	RGDHNRTLDRSGDLGDMEPLKGTTPLMQDEGQESLEEELDV
O60765_124	FQGLILKRSNRNVPWDLKLEKPYIYEGRLEKKQDKKGSFQI
O60765_135	NVPWDLKLEKPYIYEGRLEKKQDKKGSFQIVSATHKKIPTI
O60765_138	WDLKLEKPYIYEGRLEKKQDKKGSFQIVSATHKKIPTIERS
O60765_184	LSQNFSPKSVLIRQQILPREKTPPKCEIQGNSLKQNSQLLN
O60765_207	PKCEIQGNSLKQNSQLLNQPKITADKRYKCSLCEKTFINTS
O60765_30	PQVSLTFEDVAVLFTRDEWRKLAPSQRNLYRDVMLENYRNL
O60765_77	FTKPKVISLLQQGEDPWEVEKDGSGVSSLGSKSSHKTTKST
O60765_92	PWEVEKDGSGVSSLGSKSSHKTTKSTQTQDSSFQGLILKRS
O60784_106	HVLVASQDFVESVLVRTILPKNNPPTIVHDKVLNLIQSWAD
O60784_219	PAPPILSGDTPIAPTPEQIGKLRSELEMVSGNVRVMSEMLT
O60784_311	LNNVFLRHERFERFRTGQTTKAPSEAEPAADLIDMGPDPAA
O60784_382	LEDEFDMFALTRGSSLADQRKEVKYEAPQATDGLAGALDAR
O60784_445	STDVGNDAEEPKGVTSEEFDKFLEERAKAADRLPNLSSPSA
O60784_479	NLSSPSAEGPPGPPSGPAPRKKTQEKDDDMLFALXXXXXXX
O60784_484	SAEGPPGPPSGPAPRKKTQEKDDDMLFALXXXXXXXXXXXX
O60784_55	EICDIINETEEGPKDALRAVKKRIVGNKNFHEVMLALTVLE
O60784_56	ICDIINETEEGPKDALRAVKKRIVGNKNFHEVMLALTVLET
O60784_79	VGNKNFHEVMLALTVLETCVKNCGHRFHVLVASQDFVESVL
O60832_16	XXXXXMADAEVIILPKKHKKKKERKSLPEEDVAEIQHAEEF
O60832_257	LGVGGQMQELRRVRSGVMSEKDHMVTMHDVLDAQWLYDNHK
O60832_291	WLYDNHKDESYLRRVVYPLEKLLTSHKRLVMKDSAVNAICY
O60832_302	LRRVVYPLEKLLTSHKRLVMKDSAVNAICYGAKIMLPGVLR
O60832_339	GVLRYEDGIEVNQEIVVITTKGEAICMAIALMTTAVISTCD
O60832_365	MAIALMTTAVISTCDHGIVAKIKRVIMERDTYPRKWGLGPK
O60832_367	IALMTTAVISTCDHGIVAKIKRVIMERDTYPRKWGLGPKAS
O60832_389	VIMERDTYPRKWGLGPKASQKKLMIKQGLLDKHGKPTDSTP
O60832_390	IMERDTYPRKWGLGPKASQKKLMIKQGLLDKHGKPTDSTPA
O60832_400	WGLGPKASQKKLMIKQGLLDKHGKPTDSTPATWKQEYVDYS
O60832_446	EVVAEVVKAPQVVAEAAKTAKRKRESESESDETPPAAPQLI
O60832_448	VAEVVKAPQVVAEAAKTAKRKRESESESDETPPAAPQLIKK
O60832_470	ESESESDETPPAAPQLIKKEKKKSKKDKKAKAGLESGAEPG
O60832_471	SESESDETPPAAPQLIKKEKKKSKKDKKAKAGLESGAEPGD
O60832_475	SDETPPAAPQLIKKEKKKSKKDKKAKAGLESGAEPGDGDSD
O60832_477	ETPPAAPQLIKKEKKKSKKDKKAKAGLESGAEPGDGDSDTT
O60832_478	TPPAAPQLIKKEKKKSKKDKKAKAGLESGAEPGDGDSDTTK
O60832_480	PAAPQLIKKEKKKSKKDKKAKAGLESGAEPGDGDSDTTKKK
O60832_500	KAGLESGAEPGDGDSDTTKKKKKKKKAKEVELVSEXXXXXX
O60832_503	LESGAEPGDGDSDTTKKKKKKKKAKEVELVSEXXXXXXXXX
O60832_504	ESGAEPGDGDSDTTKKKKKKKKAKEVELVSEXXXXXXXXXX
O60832_507	AEPGDGDSDTTKKKKKKKKAKEVELVSEXXXXXXXXXXXXX
O60884_121	GNQSRSRNGRRRGEDMMHPLKVSLEDLYNGKTTKLQLSKNV
O60884_131	RRGEDMMHPLKVSLEDLYNGKTTKLQLSKNVLCSACSGQGG
O60884_152	TTKLQLSKNVLCSACSGQGGKSGAVQKCSACRGRGVRIMIR
O60884_158	SKNVLCSACSGQGGKSGAVQKCSACRGRGVRIMIRQLAPGM
O60884_199	VQQMQSVCSDCNGEGEVINEKDRCKKCEGKKVIKEVKILEV
O60884_203	QSVCSDCNGEGEVINEKDRCKKCEGKKVIKEVKILEVHVDK
O60884_204	SVCSDCNGEGEVINEKDRCKKCEGKKVIKEVKILEVHVDKG
O60884_208	DCNGEGEVINEKDRCKKCEGKKVIKEVKILEVHVDKGMKHG
O60884_209	CNGEGEVINEKDRCKKCEGKKVIKEVKILEVHVDKGMKHGQ
O60884_223	KKCEGKKVIKEVKILEVHVDKGMKHGQRITFTGEADQAPGV
O60884_226	EGKKVIKEVKILEVHVDKGMKHGQRITFTGEADQAPGVEPG
O60884_25	ADTKLYDILGVPPGASENELKKAYRKLAKEYHPDKNPNAGD
O60884_26	DTKLYDILGVPPGASENELKKAYRKLAKEYHPDKNPNAGDK
O60884_287	LHMTYKIGLVEALCGFQFTFKHLDGRQIVVKYPPGKVIEPG
O60884_297	EALCGFQFTFKHLDGRQIVVKYPPGKVIEPGCVRVVRGEGM
O60884_30	YDILGVPPGASENELKKAYRKLAKEYHPDKNPNAGDKFKEI
O60884_39	ASENELKKAYRKLAKEYHPDKNPNAGDKFKEISFAYEVLSN
O60884_46	KAYRKLAKEYHPDKNPNAGDKFKEISFAYEVLSNPEKRELY
O60884_62	NAGDKFKEISFAYEVLSNPEKRELYDRYGEQGLREGSGGGG
O60885_1035	QGQQPPHPPPGQQPPPPQPAKPQQVIQHHHSPRHHKSDPYS
O60885_1093	MSQFQSLTHQSPPQQNVQPKKQELRAASVVQPQPLVVVKEE
O60885_1114	QELRAASVVQPQPLVVVKEEKIHSPIIRSEPFSPSLRPEPP
O60885_1135	IHSPIIRSEPFSPSLRPEPPKHPESIKAPVHLPQRPEMKPV
O60885_1177	VGRPVIRPPEQNAPPPGAPDKDKQKQEPKTPVAPKKDLKIK
O60885_1179	RPVIRPPEQNAPPPGAPDKDKQKQEPKTPVAPKKDLKIKNM
O60885_1181	VIRPPEQNAPPPGAPDKDKQKQEPKTPVAPKKDLKIKNMGS
O60885_1185	PEQNAPPPGAPDKDKQKQEPKTPVAPKKDLKIKNMGSWASL
O60885_1192	PGAPDKDKQKQEPKTPVAPKKDLKIKNMGSWASLVQKHPTT
O60885_1195	PDKDKQKQEPKTPVAPKKDLKIKNMGSWASLVQKHPTTPSS
O60885_1234	SSTAKSSSDSFEQFRRAAREKEEREKALKAQAEHAEKEKER
O60885_1250	AAREKEEREKALKAQAEHAEKEKERLRQERMRSREDEDALE
O60885_1252	REKEEREKALKAQAEHAEKEKERLRQERMRSREDEDALEQA
O60885_283	PAPQPVQSHPPIIAATPQPVKTKKGVKRKADTTTPTTIDPI
O60885_291	HPPIIAATPQPVKTKKGVKRKADTTTPTTIDPIHEPPSLPP
O60885_314	TTTPTTIDPIHEPPSLPPEPKTTKLGQRRESSRPVKPPKKD
O60885_329	LPPEPKTTKLGQRRESSRPVKPPKKDVPDSQQHPAPEKSSK
O60885_346	RPVKPPKKDVPDSQQHPAPEKSSKVSEQLKCCSGILKEMFA
O60885_362	PAPEKSSKVSEQLKCCSGILKEMFAKKHAAYAWPFYKPVDV
O60885_367	SSKVSEQLKCCSGILKEMFAKKHAAYAWPFYKPVDVEALGL
O60885_368	SKVSEQLKCCSGILKEMFAKKHAAYAWPFYKPVDVEALGLH
O60885_431	EYRDAQEFGADVRLMFSNCYKYNPPDHEVVAMARKLQDVFE
O60885_445	MFSNCYKYNPPDHEVVAMARKLQDVFEMRFAKMPDEPEEPV
O60885_537	QLKAVHEQLAALSQPQQNKPKKKEKDKKEKKKEKHKRKEEV
O60885_541	VHEQLAALSQPQQNKPKKKEKDKKEKKKEKHKRKEEVEENK
O60885_543	EQLAALSQPQQNKPKKKEKDKKEKKKEKHKRKEEVEENKKS
O60885_544	QLAALSQPQQNKPKKKEKDKKEKKKEKHKRKEEVEENKKSK
O60885_546	AALSQPQQNKPKKKEKDKKEKKKEKHKRKEEVEENKKSKAK
O60885_548	LSQPQQNKPKKKEKDKKEKKKEKHKRKEEVEENKKSKAKEP
O60885_55	PQPANAASTNPPPPETSNPNKPKRQTNQLQYLLRVVLKTLW
O60885_550	QPQQNKPKKKEKDKKEKKKEKHKRKEEVEENKKSKAKEPPP
O60885_561	KDKKEKKKEKHKRKEEVEENKKSKAKEPPPKKTKKNNSSNS
O60885_562	DKKEKKKEKHKRKEEVEENKKSKAKEPPPKKTKKNNSSNSN
O60885_564	KEKKKEKHKRKEEVEENKKSKAKEPPPKKTKKNNSSNSNVS
O60885_566	KKKEKHKRKEEVEENKKSKAKEPPPKKTKKNNSSNSNVSKK
O60885_57	PANAASTNPPPPETSNPNKPKRQTNQLQYLLRVVLKTLWKH
O60885_574	KEEVEENKKSKAKEPPPKKTKKNNSSNSNVSKKEPAPMKSK
O60885_586	KEPPPKKTKKNNSSNSNVSKKEPAPMKSKPPPTYESEEEDK
O60885_606	KEPAPMKSKPPPTYESEEEDKCKPMSYEEKRQLSLDINKLP
O60885_615	PPPTYESEEEDKCKPMSYEEKRQLSLDINKLPGEKLGRVVH
O60885_629	PMSYEEKRQLSLDINKLPGEKLGRVVHIIQSREPSLKNSNP
O60885_660	REPSLKNSNPDEIEIDFETLKPSTLRELERYVTSCLRKKRK
O60885_677	ETLKPSTLRELERYVTSCLRKKRKPQAEKVDVIAGSSKMKG
O60885_680	KPSTLRELERYVTSCLRKKRKPQAEKVDVIAGSSKMKGFSS
O60885_696	RKKRKPQAEKVDVIAGSSKMKGFSSSESESSSESSSSDSED
O60885_726	SSESSSSDSEDSETEMAPKSKKKGHPGREQKKHHHHHHQQM
O60885_728	ESSSSDSEDSETEMAPKSKKKGHPGREQKKHHHHHHQQMQQ
O60885_736	DSETEMAPKSKKKGHPGREQKKHHHHHHQQMQQAPAPVPQQ
O60885_737	SETEMAPKSKKKGHPGREQKKHHHHHHQQMQQAPAPVPQQP
O60885_76	PKRQTNQLQYLLRVVLKTLWKHQFAWPFQQPVDAVKLNLPD
O60885_883	HNALPQQPSRPSNRAAALPPKPARPPAVSPALTQTPLLPQP
O60885_937	EPPAPPLTSMQMQLYLQQLQKVQPPTPLLPSVKVQSQPPPP
O60934_105	NGFSRTLKSGDGITFGVFGSKFRIEYEPLVACSSCLDVSGK
O60934_156	GGFTVNNWTEECTHLVMVSVKVTIKTICALICGRPIVKPEY
O60934_187	CGRPIVKPEYFTEFLKAVESKKQPPQIESFYPPLDEPSIGS
O60934_219	PLDEPSIGSKNVDLSGRQERKQIFKGKTFIFLNAKQHKKLS
O60934_223	PSIGSKNVDLSGRQERKQIFKGKTFIFLNAKQHKKLSSAVV
O60934_236	QERKQIFKGKTFIFLNAKQHKKLSSAVVFGGGEARLITEEN
O60934_287	GTCVVDTGITNSQTLIPDCQKKWIQSIMDMLQRQGLRPIPE
O60934_392	ADTWDLSERPKEIKVSKMEQKFRMLSQDAPTVKESCKTSSN
O60934_404	IKVSKMEQKFRMLSQDAPTVKESCKTSSNNNSMVSNTLAKM
O60934_408	KMEQKFRMLSQDAPTVKESCKTSSNNNSMVSNTLAKMRIPN
O60934_435	SMVSNTLAKMRIPNYQLSPTKLPSINKSKDRASQQQQTNSI
O60934_441	LAKMRIPNYQLSPTKLPSINKSKDRASQQQQTNSIRNYFQP
O60934_443	KMRIPNYQLSPTKLPSINKSKDRASQQQQTNSIRNYFQPST
O60934_464	DRASQQQQTNSIRNYFQPSTKKRERDEENQEMSSCKSARIE
O60934_502	RIETSCSLLEQTQPATPSLWKNKEQHLSENEPVDTNSDNNL
O60934_533	PVDTNSDNNLFTDTDLKSIVKNSASKSHAAEKLRSNKKREM
O60934_538	SDNNLFTDTDLKSIVKNSASKSHAAEKLRSNKKREMDDVAI
O60934_549	KSIVKNSASKSHAAEKLRSNKKREMDDVAIEDEVLEQLFKD
O60934_568	NKKREMDDVAIEDEVLEQLFKDTKPELEIDVKVQKQEEDVN
O60934_623	FSDEAVPESSKISQENEIGKKRELKEDSLWSAKEISNNDKL
O60934_635	SQENEIGKKRELKEDSLWSAKEISNNDKLQDDSEMLPKKLL
O60934_653	SAKEISNNDKLQDDSEMLPKKLLLTEFRSLVIKNSTSRNPS
O60934_665	DDSEMLPKKLLLTEFRSLVIKNSTSRNPSGINDDYGQLKNF
O60934_686	NSTSRNPSGINDDYGQLKNFKKFKKVTYPGAGKLPHIIGGS
O60934_687	STSRNPSGINDDYGQLKNFKKFKKVTYPGAGKLPHIIGGSD
O60934_689	SRNPSGINDDYGQLKNFKKFKKVTYPGAGKLPHIIGGSDLI
O60934_73	SVTNLSQTDEIPVLTLKDNSKYGTFVNEEKMQNGFSRTLKS
O75123_79	LLGNPEGQSLGSSPSQDRGCKQVTVTHWKIQTGETAQVCTK
O75123_87	SLGSSPSQDRGCKQVTVTHWKIQTGETAQVCTKSGRNHILN
O75132_1026	TLLDPRYKASLFTEEEAEQYKQDLIRELELMNSTSEDVAAS
O75132_1070	DAGSPSKDSAAEENLWSLVAKVKKKDPREKLPEAMVLAYLE
O75132_1073	SPSKDSAAEENLWSLVAKVKKKDPREKLPEAMVLAYLEEEV
O75132_1074	PSKDSAAEENLWSLVAKVKKKDPREKLPEAMVLAYLEEEVL
O75132_1079	AAEENLWSLVAKVKKKDPREKLPEAMVLAYLEEEVLEHSCD
O75132_1107	AYLEEEVLEHSCDPLTYWNLKKASWPGLSALAVRFLGCPPS
O75132_1108	YLEEEVLEHSCDPLTYWNLKKASWPGLSALAVRFLGCPPSI
O75132_1133	GLSALAVRFLGCPPSIVPSEKLFNTPTENGSLGQSRLMMEH
O75132_1156	NTPTENGSLGQSRLMMEHFEKLIFLKVNLPLIYFQYXXXXX
O75132_133	SSRKKSPAWKHFFISPRDSTKAICMYCVKEFSRGKNEKDLS
O75132_21	MENNLKTCPKEDGDFVSDKIKFKIEEEDDDGIPPDSLERMD
O75132_215	DAGDLSTILSPIKLVQKVASKIPSPDRITEESVSVVSSEEI
O75132_244	EESVSVVSSEEISSDMSVSEKCGREEALVGSSPHLPALHYD
O75132_317	SPLDNSKAVCIHCMNEFSRGKNGKDLGTSCLIRHMWRAHRA
O75132_378	LLPSLLPPEGELSSVSSSPVKPVRESPSASSSPDRLTEDLQ
O75132_430	DVAAFSSSDDIGEASASSPEKQQADGLSPRLFESGAIFQQN
O75132_452	QADGLSPRLFESGAIFQQNKKVMKRLKSEVWHHFSLAPMDS
O75132_488	APMDSLKAECRYCGCAISRGKKGDVGTSCLMRHLYRRHPEV
O75132_513	GTSCLMRHLYRRHPEVVGSQKGFLGASLANSPYATLASAES
O75132_559	TDLPTVVTKNNQVMFPVNSKKTSKLWNHFSICSADSTKVVC
O75132_562	PTVVTKNNQVMFPVNSKKTSKLWNHFSICSADSTKVVCLHC
O75132_656	SGASSFDDTNEKFYDSHPVAKKITSLIAEMIALDLQPYSFV
O75132_657	GASSFDDTNEKFYDSHPVAKKITSLIAEMIALDLQPYSFVD
O75132_689	DLQPYSFVDNVGFNRLLEYLKPQYSLPAPSYFSRTAIPGMY
O75132_713	SLPAPSYFSRTAIPGMYDNVKQIIMSHLKEAESGVIHFTSG
O75132_721	SRTAIPGMYDNVKQIIMSHLKEAESGVIHFTSGIWMSNQTR
O75132_73	DSGGERAGLGGTGCSCKPPGKYLSAESEDDYGALFSQYSST
O75132_786	CSALLDVSQVDCDYSGNSIQKQLECWWEAWVTSTGLQVGIT
O75132_815	WVTSTGLQVGITVTDNASIGKTLNEGEHSSVQCFSHTVNLI
O75132_865	MVQNLLSLARKICERVHRSPKAKEKLAELQREYALPQHHLI
O75132_867	QNLLSLARKICERVHRSPKAKEKLAELQREYALPQHHLIQD
O75132_869	LLSLARKICERVHRSPKAKEKLAELQREYALPQHHLIQDVP
O75132_891	AELQREYALPQHHLIQDVPSKWSTSFHMLERLIEQKRAINE
O75132_938	FRELISCDQWEVMQSVCRALKPFEAASREMSTQMSTLSQVI
O75132_967	MSTQMSTLSQVIPMVHILNRKVEMLFEETMGIDTMLRSLKE
O75150_20	XMSGPGNKRAAGDGGSGPPEKKLSREEKTTTTLIEPIRLGG
O75150_21	MSGPGNKRAAGDGGSGPPEKKLSREEKTTTTLIEPIRLGGI
O75150_288	AETKVLEMETTVEDLQWDIEKLRKREQKLNKHLAEALEQLN
O75150_298	TVEDLQWDIEKLRKREQKLNKHLAEALEQLNSGYYVSGSSS
O75150_371	AELEKLQAELQGAVRTNERLKVALRSLPEEVVRETGEYRML
O75150_406	GEYRMLQAQFSLLYNESLQVKTQLDEARGLLLATKNSHLRH
O75150_439	TKNSHLRHIEHMESDELGLQKKLRTEVIQLEDTLAQVRKEY
O75150_440	KNSHLRHIEHMESDELGLQKKLRTEVIQLEDTLAQVRKEYE
O75150_457	LQKKLRTEVIQLEDTLAQVRKEYEMLRIEFEQNLAANEQAG
O75150_517	LKGDAQRYKRKLREVQAEIGKLRAQASGSAHSTPNLGHPED
O75150_55	PIRLGGISSTEEMDLKVLQFKNKKLAERLEQRQACEDELRE
O75150_562	APAPGKEEGGPGPVSTPDNRKEMAPVPGTTTTTTSVKKEEL
O75150_58	LGGISSTEEMDLKVLQFKNKKLAERLEQRQACEDELRERIE
O75150_611	GITPGAQGPSSRGREPEARPKRELREREGPSLGPPPVASAL
O75150_638	EGPSLGPPPVASALSRADREKAKVEETKRKESELLKGLRAE
O75150_661	VEETKRKESELLKGLRAELKKAQESQKEMKLLLDMYKSAPK
O75150_670	ELLKGLRAELKKAQESQKEMKLLLDMYKSAPKEQRDKVQLM
O75150_677	AELKKAQESQKEMKLLLDMYKSAPKEQRDKVQLMAAERKAK
O75150_697	KSAPKEQRDKVQLMAAERKAKAEVDELRSRIRELEERDRRE
O75150_719	EVDELRSRIRELEERDRRESKKIADEDALRRIRQAEEQIEH
O75150_720	VDELRSRIRELEERDRRESKKIADEDALRRIRQAEEQIEHL
O75150_788	MQEQNGRLLQQLREKDDANFKLMSERIKANQIHKLLREEKD
O75150_860	GSLGGVEKELTLRSQALELNKRKAVEAAQLAEDLKVQLEHV
O75150_862	LGGVEKELTLRSQALELNKRKAVEAAQLAEDLKVQLEHVQT
O75150_921	ESFNLKRAQEDISRLRRKLEKQRKVEVYADADEILQEEIKE
O75150_943	RKVEVYADADEILQEEIKEYKARLTCPCCNTRKKDAVLTKC
O75150_962	YKARLTCPCCNTRKKDAVLTKCFHVFCFECVRGRYEARQRK
O75151_1067	GVFLTQRRPSASSPNNNTAAKGKRTKKGMATAKQRLGKILK
O75151_1069	FLTQRRPSASSPNNNTAAKGKRTKKGMATAKQRLGKILKIH
O75151_1072	QRRPSASSPNNNTAAKGKRTKKGMATAKQRLGKILKIHRNG
O75151_1073	RRPSASSPNNNTAAKGKRTKKGMATAKQRLGKILKIHRNGK
O75151_1079	SPNNNTAAKGKRTKKGMATAKQRLGKILKIHRNGKLLLXXX
O75151_166	VSDVENYVGPERSVDVTDVTKQKDCKMKLKEFVDYYYSTNR
O75151_168	DVENYVGPERSVDVTDVTKQKDCKMKLKEFVDYYYSTNRKR
O75151_173	VGPERSVDVTDVTKQKDCKMKLKEFVDYYYSTNRKRVLNVT
O75151_214	NLEFSDTRMSSFVEPPDIVKKLSWVENYWPDDALLAKPKVT
O75151_230	DIVKKLSWVENYWPDDALLAKPKVTKYCLICVKDSYTDFHI
O75151_235	LSWVENYWPDDALLAKPKVTKYCLICVKDSYTDFHIDSGGA
O75151_263	DSYTDFHIDSGGASAWYHVLKGEKTFYLIRPASANISLYER
O75151_266	TDFHIDSGGASAWYHVLKGEKTFYLIRPASANISLYERWRS
O75151_27	YCVCRLPYDVTRFMIECDACKDWFHGSCVGVEEEEAPDIDI
O75151_301	YERWRSASNHSEMFFADQVDKCYKCIVKQGQTLFIPSGWIY
O75151_304	WRSASNHSEMFFADQVDKCYKCIVKQGQTLFIPSGWIYATL
O75151_308	SNHSEMFFADQVDKCYKCIVKQGQTLFIPSGWIYATLTPVD
O75151_356	FLHSLSVEMQMRAYEVERRLKLGSLTQFPNFETACWYMGKH
O75151_386	FETACWYMGKHLLEAFKGSHKSGKQLPPHLVQGAKILNGAF
O75151_389	ACWYMGKHLLEAFKGSHKSGKQLPPHLVQGAKILNGAFRSW
O75151_411	LPPHLVQGAKILNGAFRSWTKKQALAEHEDELPEHFKPSQL
O75151_433	QALAEHEDELPEHFKPSQLIKDLAKEIRLSENASKAVRPEV
O75151_437	EHEDELPEHFKPSQLIKDLAKEIRLSENASKAVRPEVNTVA
O75151_487	REKEEPPSPIEATPPQSLLEKVSKKKTPKTVKMPKPSKIPK
O75151_492	PPSPIEATPPQSLLEKVSKKKTPKTVKMPKPSKIPKPPKPP
O75151_498	ATPPQSLLEKVSKKKTPKTVKMPKPSKIPKPPKPPKPPRPP
O75151_504	LLEKVSKKKTPKTVKMPKPSKIPKPPKPPKPPRPPKTLKLK
O75151_524	KIPKPPKPPKPPRPPKTLKLKDGGKKKGKKSRESASPTIPN
O75151_528	PPKPPKPPRPPKTLKLKDGGKKKGKKSRESASPTIPNLDLL
O75151_532	PKPPRPPKTLKLKDGGKKKGKKSRESASPTIPNLDLLEAHT
O75151_533	KPPRPPKTLKLKDGGKKKGKKSRESASPTIPNLDLLEAHTK
O75151_558	ASPTIPNLDLLEAHTKEALTKMEPPKKGKATKSVLSVPNKD
O75151_564	NLDLLEAHTKEALTKMEPPKKGKATKSVLSVPNKDVVHMQN
O75151_577	TKMEPPKKGKATKSVLSVPNKDVVHMQNDVERLEIREQTKS
O75151_596	NKDVVHMQNDVERLEIREQTKSKSEAKWKYKNSKPDSLLKM
O75151_598	DVVHMQNDVERLEIREQTKSKSEAKWKYKNSKPDSLLKMEE
O75151_602	MQNDVERLEIREQTKSKSEAKWKYKNSKPDSLLKMEEEQKL
O75151_609	LEIREQTKSKSEAKWKYKNSKPDSLLKMEEEQKLEKSPLAG
O75151_621	AKWKYKNSKPDSLLKMEEEQKLEKSPLAGNKDNKFSFSFSN
O75151_624	KYKNSKPDSLLKMEEEQKLEKSPLAGNKDNKFSFSFSNKKL
O75151_63	PDIDIYHCPNCEKTHGKSTLKKKRTWHKHGPGQAPDVKPVQ
O75151_634	LKMEEEQKLEKSPLAGNKDNKFSFSFSNKKLLGSKALRPPT
O75151_65	IDIYHCPNCEKTHGKSTLKKKRTWHKHGPGQAPDVKPVQNG
O75151_669	ALRPPTSPGVFGALQNFKEDKPKPVRDEYEYVSDDGELKID
O75151_671	RPPTSPGVFGALQNFKEDKPKPVRDEYEYVSDDGELKIDEF
O75151_687	EDKPKPVRDEYEYVSDDGELKIDEFPIRRKKNAPKRDLSFL
O75151_696	EYEYVSDDGELKIDEFPIRRKKNAPKRDLSFLLDKKAVLPT
O75151_697	YEYVSDDGELKIDEFPIRRKKNAPKRDLSFLLDKKAVLPTP
O75151_70	CPNCEKTHGKSTLKKKRTWHKHGPGQAPDVKPVQNGSQLFI
O75151_701	SDDGELKIDEFPIRRKKNAPKRDLSFLLDKKAVLPTPVTKP
O75151_710	EFPIRRKKNAPKRDLSFLLDKKAVLPTPVTKPKLDSAAYKS
O75151_720	PKRDLSFLLDKKAVLPTPVTKPKLDSAAYKSDDSSDEGSLH
O75151_746	AAYKSDDSSDEGSLHIDTDTKPGRNARVKKESGSSAAGILD
O75151_754	SDEGSLHIDTDTKPGRNARVKKESGSSAAGILDLLQASEEV
O75151_755	DEGSLHIDTDTKPGRNARVKKESGSSAAGILDLLQASEEVG
O75151_821	MANLQASDSCLQTTWGAGQAKGSSLAAHGARKNGGGSGKSA
O75151_832	QTTWGAGQAKGSSLAAHGARKNGGGSGKSAGKRLLKRAAKN
O75151_839	QAKGSSLAAHGARKNGGGSGKSAGKRLLKRAAKNSVDLDDY
O75151_843	SSLAAHGARKNGGGSGKSAGKRLLKRAAKNSVDLDDYEEEQ
O75151_847	AHGARKNGGGSGKSAGKRLLKRAAKNSVDLDDYEEEQDHLD
O75151_851	RKNGGGSGKSAGKRLLKRAAKNSVDLDDYEEEQDHLDACFK
O75151_871	KNSVDLDDYEEEQDHLDACFKDSDYVYPSLESDEDNPIFKS
O75151_890	FKDSDYVYPSLESDEDNPIFKSRSKKRKGSDDAPYSPTARV
O75151_894	DYVYPSLESDEDNPIFKSRSKKRKGSDDAPYSPTARVGPSV
O75151_895	YVYPSLESDEDNPIFKSRSKKRKGSDDAPYSPTARVGPSVP
O75151_897	YPSLESDEDNPIFKSRSKKRKGSDDAPYSPTARVGPSVPRQ
O75151_940	PVREGTRVASIETGLAAAAAKLSQQEEQKSKKKKSAKRKLT
O75151_951	ETGLAAAAAKLSQQEEQKSKKKKSAKRKLTPNTTSPSTSTS
O75151_952	TGLAAAAAKLSQQEEQKSKKKKSAKRKLTPNTTSPSTSTSI
O75151_956	AAAAKLSQQEEQKSKKKKSAKRKLTPNTTSPSTSTSISAGT
O75151_958	AAKLSQQEEQKSKKKKSAKRKLTPNTTSPSTSTSISAGTTS
O75152_18	XXXMPNQGEDCYFFFYSTCTKGDSCPFRHCEAAIGNETVCT
O75152_226	QGECLNFGIKTLEEIKSKKMKEKSKKQGEGSSGVSSLLLHP
O75152_228	ECLNFGIKTLEEIKSKKMKEKSKKQGEGSSGVSSLLLHPEP
O75152_230	LNFGIKTLEEIKSKKMKEKSKKQGEGSSGVSSLLLHPEPVP
O75152_286	LSTKQGEEPLVRLSLTERLGKRKFSAGGDSDPPLKRSLAQR
O75152_309	FSAGGDSDPPLKRSLAQRLGKKVEAPETNIDKTPKKAQVSK
O75152_332	EAPETNIDKTPKKAQVSKSLKERLGMSADPDNEDATDKVNK
O75152_372	KVGEIHVKTLEEILLERASQKRGELQTKLKTEGPSKTDDST
O75152_413	SGARSSSTIRIKTFSEVLAEKKHRQQEAERQKSKKDTTCIK
O75152_414	GARSSSTIRIKTFSEVLAEKKHRQQEAERQKSKKDTTCIKL
O75152_424	KTFSEVLAEKKHRQQEAERQKSKKDTTCIKLKIDSEIKKTV
O75152_433	KKHRQQEAERQKSKKDTTCIKLKIDSEIKKTVVLPPIVASR
O75152_521	ATPGARRLLRITKRTGMKEEKNLQEGNEVDSQSSIRTEAKE
O75152_565	ETTGVDITKIQVKRCETMREKHMQKQQEREKSVLTPLRGDV
O75152_610	TQVAEKPVLTAVPGITRHLTKRLPTKSSQKVEVETSGIGDS
O75152_646	GIGDSLLNVKCAAQTLEKRGKAKPKVNVKPSVVKVVSSPKL
O75152_648	GDSLLNVKCAAQTLEKRGKAKPKVNVKPSVVKVVSSPKLAP
O75152_795	KLIWEISGGKLEAEIDLDPGKDEDDLLLELSEMIDSXXXXX
O75179_1114	GHEELVQTLLERGASIEHRDKKGFTPLILAATAGHVGVVEI
O75179_1150	GVVEILLDNGADIEAQSERTKDTPLSLACSGGRQEVVELLL
O75179_1216	VNIIKILLNAGAEINSRTGSKLGISPLMLAAMNGHTAAVKL
O75179_1275	ALTLACFQGRTEVVSLLLDRKANVEHRAKTGLTPLMEAASG
O75179_1330	DVNAPPVPSSRDTALTIAADKGHYKFCELLIGRGAHIDVRN
O75179_1334	PPVPSSRDTALTIAADKGHYKFCELLIGRGAHIDVRNKKGN
O75179_1386	LDVVQLLVQAGADVDAADNRKITPLMAAFRKGHVKVVRYLV
O75179_1396	GADVDAADNRKITPLMAAFRKGHVKVVRYLVKEVNQFPSDS
O75179_1407	ITPLMAAFRKGHVKVVRYLVKEVNQFPSDSECMRYIATITD
O75179_1432	FPSDSECMRYIATITDKEMLKKCHLCMESIVQAKDRQAAEA
O75179_1454	CHLCMESIVQAKDRQAAEANKNASILLEELDLEKLREESRR
O75179_1467	RQAAEANKNASILLEELDLEKLREESRRLALAAKREKRKEK
O75179_1480	LEELDLEKLREESRRLALAAKREKRKEKRRKKKEEQRRKLE
O75179_1483	LDLEKLREESRRLALAAKREKRKEKRRKKKEEQRRKLEEIE
O75179_1485	LEKLREESRRLALAAKREKRKEKRRKKKEEQRRKLEEIEAK
O75179_1491	ESRRLALAAKREKRKEKRRKKKEEQRRKLEEIEAKNKENFE
O75179_1498	AAKREKRKEKRRKKKEEQRRKLEEIEAKNKENFELQAAQEK
O75179_1505	KEKRRKKKEEQRRKLEEIEAKNKENFELQAAQEKEKLKVED
O75179_1522	IEAKNKENFELQAAQEKEKLKVEDEPEVLTEPPSATTTTTI
O75179_1557	TTTTTIGISATWTTLAGSHGKRNNTITTTSSKRKNRKNKIT
O75179_1568	WTTLAGSHGKRNNTITTTSSKRKNRKNKITPENVQIIFDDP
O75179_1573	GSHGKRNNTITTTSSKRKNRKNKITPENVQIIFDDPLPISY
O75179_1604	IFDDPLPISYSQPEKVNGESKSSSTSESGDSDNMRISSCSD
O75179_1651	SSRKSDNHSPAVVTTTVSSKKQPSVLVTFPKEERKSVSGKA
O75179_1661	AVVTTTVSSKKQPSVLVTFPKEERKSVSGKASIKLSETISE
O75179_1665	TTVSSKKQPSVLVTFPKEERKSVSGKASIKLSETISEGTSN
O75179_1670	KKQPSVLVTFPKEERKSVSGKASIKLSETISEGTSNSLSTC
O75179_1674	SVLVTFPKEERKSVSGKASIKLSETISEGTSNSLSTCTKSG
O75179_1692	SIKLSETISEGTSNSLSTCTKSGPSPLSSPNGKLTVASPKR
O75179_1711	TKSGPSPLSSPNGKLTVASPKRGQKREEGWKEVVRRSKKVS
O75179_1721	PNGKLTVASPKRGQKREEGWKEVVRRSKKVSVPSTVISRVI
O75179_1729	SPKRGQKREEGWKEVVRRSKKVSVPSTVISRVIGRGGCNIN
O75179_1765	GCNINAIREFTGAHIDIDKQKDKTGDRIITIRGGTESTRQA
O75179_1767	NINAIREFTGAHIDIDKQKDKTGDRIITIRGGTESTRQATQ
O75179_1798	GTESTRQATQLINALIKDPDKEIDELIPKNRLKSSSANSKI
O75179_1806	TQLINALIKDPDKEIDELIPKNRLKSSSANSKIGSSAPTTT
O75179_186	TVDPETQARLEALLEAAGIGKLSTADGKAFADPEVLRRLTS
O75179_1864	STSQTATALTVPAISSASTHKTIKNPVNNVRPGFPVSLPLA
O75179_1867	QTATALTVPAISSASTHKTIKNPVNNVRPGFPVSLPLAYPP
O75179_193	ARLEALLEAAGIGKLSTADGKAFADPEVLRRLTSSVSCALD
O75179_2070	AQPGGVSRNSPLDCGSASPNKVASSSEQEAGSPPVVETTNT
O75179_2172	TAPVTYPMPQTPMGCPQPTPKMETPAIRPPPHGTTAPHKNS
O75179_2209	HKNSASVQNSSVAVLSVNHIKRPHSVPSSVQLPSTLSTQSA
O75179_2239	QLPSTLSTQSACQNSVHPANKPIAPNFSAPLPFGPFSTLFE
O75179_2304	LSGKSSYLPNSDPLHQSDTSKAPGFRPPLQRPAPSPSGIVN
O75179_2422	PAPSSVPLGSEKPSNVSQDRKVPVPIGTERSARIRQTGTSA
O75179_2471	STSVGHSGIWSFEGIGGNQDKVDWCNPGMGNPMIHRPMSDP
O75179_252	QSDNRSLAEACSEGDVNAVRKLLIEGRSVNEHTEEGESLLC
O75179_2527	IVTPSGTFHQHVPAGYMDFPKVGGMPFSVYGNAMIPPVAPI
O75179_2571	AGGPIFNGPHAADPSWNSLIKMVSSSTENNGPQTVWTGPWA
O75179_324	PLMAAANGGHVKIVKLLLAHKADVNAQSSTGNTALTYACAG
O75179_411	AGINTHSNEFKESALTLACYKGHLEMVRFLLEAGADQEHKT
O75179_430	YKGHLEMVRFLLEAGADQEHKTDEMHTALMEACMDGHVEVA
O75179_555	ETALTLACCGGFLEVADFLIKAGADIELGCSTPLMEAAQEG
O75179_636	LLQAGADLEHESEGGRTPLMKAARAGHVCTVQFLISKGANV
O75179_652	TPLMKAARAGHVCTVQFLISKGANVNRTTANNDHTVLSLAC
O75179_75	VRVCDLLLKKKPPQQQHHKAKRNRTCRPPSSSESSSDSDNS
O75179_777	PPQEPDKPPANVATTLPIRNKAASKQKSSSHLPANSQDVQG
O75179_781	PDKPPANVATTLPIRNKAASKQKSSSHLPANSQDVQGYITN
O75179_823	SPESIVEEAQGKLTELEQRIKEAIEKNAQLQSLELAHADQL
O75179_845	AIEKNAQLQSLELAHADQLTKEKIEELNKTREEQIQKKQKI
O75179_847	EKNAQLQSLELAHADQLTKEKIEELNKTREEQIQKKQKILE
O75179_862	QLTKEKIEELNKTREEQIQKKQKILEELQKVERELQLKTQQ
[truncated: 22,457 more rows]
