# Supplementary material for: An application of topological data analysis in predicting sumoylation sites
Source: PeerJ. 2023 Oct 12;11:e16204. doi: 10.7717/peerj.16204 (PMC10576966; doi:10.7717/peerj.16204)
Supplement: Supplemental Information 10 [file peerj-11-16204-s010.xlsx]

## Sheet: Sheet1
ue_pos	seq
H2L0N8_347	SNSVKEEPTIILKDNYFLPPKAPGRQYSRIQRIQNVLNNRV
H2L0N8_37	RTPIIRREIKLGCFGIGSAGKTTFLKVLKGEDPRDLLRTNG
O00257_555	PFFGNIIITDVTANCLTVTFKEYVTVXXXXXXXXXXXXXXX
O14503_210	KPSDPAPKVMDFKEKPSSPAKGSEGPGKNCVPVIQRTFAHS
O14503_217	KVMDFKEKPSSPAKGSEGPGKNCVPVIQRTFAHSSGEQSGS
O15446_251	GTEPTVETLEPLGVLFPSTTKKRKKPKGKETFEPEDKTVKQ
O15446_252	TEPTVETLEPLGVLFPSTTKKRKKPKGKETFEPEDKTVKQE
O15525_53	SVRELNQHLRGLSKEEIVQLKQRRRTLKNRGYAASCRVKRV
O15525_60	HLRGLSKEEIVQLKQRRRTLKNRGYAASCRVKRVTQKEELE
O35426-2_146	LRTRLGMDTLDPDEVPEVEAKGSGVRLVAGSGTSAAGAGPV
O35426-2_204	DSESDILLGILDKLDPVMFFKCPSPESASLEELPEVYPEGP
O35426-2_241	PEGPSSLPASLSLSVGTSSAKLEAINELIRFDHVYTKPLVL
O35426-2_257	TSSAKLEAINELIRFDHVYTKPLVLEIPSETESQTNVVVKI
O35426-2_298	EEAPLSSSEEDHPEFIVSVKKEPLEDDFIPELGISNLLSSS
O43290_175	VINPMALRQREELREKLAAAKEKRLLNQKLGKIKTLGEDDP
O43290_188	REKLAAAKEKRLLNQKLGKIKTLGEDDPWLDDTAAWIERSR
O43290_524	EKGRRLRQLQQLQQLRDSGEKVVEIVKKLESRQRGWEEDED
O43290_530	RQLQQLQQLRDSGEKVVEIVKKLESRQRGWEEDEDPERKGA
O43290_758	SGKMKTERRMKKLDEEALLKKMSSSDTPLGTVALLQEKQKA
O43290_775	LLKKMSSSDTPLGTVALLQEKQKAQKTPYIVLSGSGKSMNA
O60016_193	IKEATSPKTSSILTKPRNPSKLDSYTHLSFYEKRELFRKKL
O60016_211	PSKLDSYTHLSFYEKRELFRKKLREIEGPEVTLVNEVDDEP
O60216_591	LAKTGAESISLLELCRNTNRKQAAAKFYSFLVLKKQQAIEL
O60216_596	AESISLLELCRNTNRKQAAAKFYSFLVLKKQQAIELTQEEP
O60315_13	XXXXXXXXMKQPIMADGPRCKRRKQANPRRKNVVNYDNVVD
O60315_298	GNRKFKCTECGKAFKYKHHLKEHLRIHSGEKPYECPNCKKR
O60315_316	HLKEHLRIHSGEKPYECPNCKKRFSHSGSYSSHISSKKCIG
O60315_332	CPNCKKRFSHSGSYSSHISSKKCIGLISVNGRMRNNIKTGS
O60315_605	FCKESFPGPIPLHQHERYLCKMNEEIKAVLQPHENIVPNKA
O60315_624	CKMNEEIKAVLQPHENIVPNKAGVFVDNKALLLSSVLSEKG
O60566_438	EVFRKKLKEQREAELLTSAEKRAEMQKQIEEMEKKLKEIQT
O60566_444	LKEQREAELLTSAEKRAEMQKQIEEMEKKLKEIQTTQQERT
O60566_451	ELLTSAEKRAEMQKQIEEMEKKLKEIQTTQQERTGDQQEET
O60566_452	LLTSAEKRAEMQKQIEEMEKKLKEIQTTQQERTGDQQEETM
O60566_454	TSAEKRAEMQKQIEEMEKKLKEIQTTQQERTGDQQEETMPT
O60566_479	TQQERTGDQQEETMPTKETTKLQIASESQKIPGMTLSSSVC
O60885_314	TTTPTTIDPIHEPPSLPPEPKTTKLGQRRESSRPVKPPKKD
O60885_317	PTTIDPIHEPPSLPPEPKTTKLGQRRESSRPVKPPKKDVPD
O60885_329	LPPEPKTTKLGQRRESSRPVKPPKKDVPDSQQHPAPEKSSK
O60885_332	EPKTTKLGQRRESSRPVKPPKKDVPDSQQHPAPEKSSKVSE
O60885_346	RPVKPPKKDVPDSQQHPAPEKSSKVSEQLKCCSGILKEMFA
O60885_349	KPPKKDVPDSQQHPAPEKSSKVSEQLKCCSGILKEMFAKKH
O60885_355	VPDSQQHPAPEKSSKVSEQLKCCSGILKEMFAKKHAAYAWP
O60885_362	PAPEKSSKVSEQLKCCSGILKEMFAKKHAAYAWPFYKPVDV
O60885_368	SKVSEQLKCCSGILKEMFAKKHAAYAWPFYKPVDVEALGLH
O60885_456	DHEVVAMARKLQDVFEMRFAKMPDEPEEPVVAVSSPAVPPP
O60885_537	QLKAVHEQLAALSQPQQNKPKKKEKDKKEKKKEKHKRKEEV
O74261_242	TNTKTGKVEFENPLILLSEKKISSIQDILPSLELSNQTRRP
O75030_193	PGSSAPNSPMAMLTLNSNCEKEGFYKFEEQNRAESECPGMN
O75475_175	KQVETEEAGVVTTATASVNLKVSPKRGRPAATEVKIPKPRG
O75475_189	TASVNLKVSPKRGRPAATEVKIPKPRGRPKMVKQPCPSESD
O75475_233	EEDKSKKKGQEEKQPKKQPKKDEEGQKEEDKPRKEPDKKEG
O75475_239	KKGQEEKQPKKQPKKDEEGQKEEDKPRKEPDKKEGKKEVES
O75475_360	VEKKRETSMDSRLQRIHAEIKNSLKIDNLDVNRCIEALDEL
O75475_401	ASLQVTMQQAQKHTEMITTLKKIRRFKVSQVIMEKSTMLYN
O75475_402	SLQVTMQQAQKHTEMITTLKKIRRFKVSQVIMEKSTMLYNK
O75475_407	MQQAQKHTEMITTLKKIRRFKVSQVIMEKSTMLYNKFKNMF
O75475_415	EMITTLKKIRRFKVSQVIMEKSTMLYNKFKNMFLVGEGDSV
O75475_470	HEEANKTKDQGKKGPNKKLEKEQTGSKTLNGGSDAQDGNQP
O75533_1149	LPALMNEYRVPELNVQNGVLKSLSFLFEYIGEMGKDYIYAV
O75533_240	QAETPGHTPSLRWDETPGRAKGSETPGATPGSKIWDPTPSH
O75533_252	WDETPGRAKGSETPGATPGSKIWDPTPSHTPAGAATPGRGD
O75533_290	RGDTPGHATPGHGGATSSARKNRWDETPKTERDTPGHGSGW
O75626_767	DDISVISVVEKEILAVVRKEKEETGLKVSLQRNMGNGLLSS
O80982_230	TFLAKALNNPNFVQQFAVMSKEKKSLFGLDVGRKRRLTSTP
O95785_1112	TQSRPGGPPNPPGPSPKALAKMMGGAGPGSSLEARSPSDLH
P01100_139	RAQSIGRRGKVEQLSPEEEEKRRIRRERNKMAAAKCRNRRR
P01100_176	NRRRELTDTLQAETDQLEDEKSALQTEIANLLKEKEKLEFI
P01100_188	ETDQLEDEKSALQTEIANLLKEKEKLEFILAAHRPACKIPD
P01100_190	DQLEDEKSALQTEIANLLKEKEKLEFILAAHRPACKIPDDL
P02545_155	KDLEALLNSKEAALSTALSEKRTLEGELHDLRGQVAKLEAA
P02545_219	TMKEELDFQKNIYSEELRETKRRHETRLVEIDNGKQREFES
P02545_341	RDLEDSLARERDTSRRLLAEKEREMAEMRARMQQQLDEYQE
P04050_34	VKEVQFGLFSPEEVRAISVAKIRFPETMDETQTRAKIGGLN
P04050_343	KSIRARLKGKEGRIRGNLMGKRVDFSARTVISGDPNLELDQ
P04050_368	SARTVISGDPNLELDQVGVPKSIAKTLTYPEVVTPYNIDRL
P04050_880	LGNVIQFIYGEDGMDAAHIEKQSLDTIGGSDAAFEKRYRVD
P04050_895	AAHIEKQSLDTIGGSDAAFEKRYRVDLLNTDHTLDPSLLES
P04150_40	AQERGDVMDFYKTLRGGATVKVSASSPSLAVASQSDSKQRR
P04786_245	EIKEFSRCDFTKMFDYFQLQKEQKKQLTSQEKKQIRLEREK
P04786_248	EFSRCDFTKMFDYFQLQKEQKKQLTSQEKKQIRLEREKFEE
P04786_249	FSRCDFTKMFDYFQLQKEQKKQLTSQEKKQIRLEREKFEED
P04786_256	KMFDYFQLQKEQKKQLTSQEKKQIRLEREKFEEDYKFCELD
P04786_257	MFDYFQLQKEQKKQLTSQEKKQIRLEREKFEEDYKFCELDG
P04786_265	KEQKKQLTSQEKKQIRLEREKFEEDYKFCELDGRREQVGNF
P04786_271	LTSQEKKQIRLEREKFEEDYKFCELDGRREQVGNFKVEPPD
P04786_755	VFCKKYDVPIEKIFTKTLREKFKWAIESVDENWRFXXXXXX
P05455_278	EIKWIDFVRGAKEGIILFKEKAKEALGKAKDANNGNLQLRN
P05455_280	KWIDFVRGAKEGIILFKEKAKEALGKAKDANNGNLQLRNKE
P05455_285	VRGAKEGIILFKEKAKEALGKAKDANNGNLQLRNKEVTWEV
P05627_56	QSMTLNLADPVGSLKPHLRAKNSDLLTSPDVGLLKLASPEL
P05783_222	EIEALKEELLFMKKNHEEEVKGLQAQIASSGLTVEVDAPKS
P05783_241	VKGLQAQIASSGLTVEVDAPKSQDLAKIMADIRAQYDELAR
P05783_262	SQDLAKIMADIRAQYDELARKNREELDKYWSQQIEESTTVV
P06778_294	FQDDDLINMGNTNSNVLTTEKDPVVAKQSPTASSNPEAEQI
P06786_713	PNVLDGFKPGQRKVLYGCFKKNLKSELKVAQLAPYVSECTA
P06786_716	LDGFKPGQRKVLYGCFKKNLKSELKVAQLAPYVSECTAYHH
P06786_851	EGIGTGWSTYIPPFNPLEIIKNIRHLMNDEELEQMHPWFRG
P06786_913	IGDNVLEITELPARTWTSTIKEYLLLGLSGNDKIKPWIKDM
P06786_954	EEQHDDNIKFIITLSPEEMAKTRKIGFYERFKLISPISLMN
P07910_288	DDDDNEDRGDDQLELIKDDEKEAEEGEDDRDSANGEDDSXX
P07910_29	TDPRSMNSRVFIGNLNTLVVKKSDVEAIFSKYGKIVGCSVH
P07910_30	DPRSMNSRVFIGNLNTLVVKKSDVEAIFSKYGKIVGCSVHK
P07910_39	FIGNLNTLVVKKSDVEAIFSKYGKIVGCSVHKGFAFVQYVN
P07910_42	NLNTLVVKKSDVEAIFSKYGKIVGCSVHKGFAFVQYVNERN
P09874_233	VDGVDEVAKKKSKKEKDKDSKLEKALKAQNDLIWNIKDELK
P09874_249	DKDSKLEKALKAQNDLIWNIKDELKKVCSTNDLKELLIFNK
P09874_253	KLEKALKAQNDLIWNIKDELKKVCSTNDLKELLIFNKQQVP
P09874_254	LEKALKAQNDLIWNIKDELKKVCSTNDLKELLIFNKQQVPS
P10071_1121	NSQNQAGYEQHFPSALPDDSKVPHGPGDFDAPGLPDSHAGQ
P10071_416	IPTVLNPVQVSSGPSESSQNKPTSESAVSSTGDPMHNKRSK
P10071_433	SQNKPTSESAVSSTGDPMHNKRSKIKPDEDLPSPGARGQQE
P10636_584	PVPMPDLKNVKSKIGSTENLKHQPGGGKVQIINKKLDLSNV
P11387_291	KEIFRKNFFKDWRKEMTNEEKNIITNLSKCDFTQMSQYFKA
P11387_326	SQYFKAQTEARKQMSKEEKLKIKEENEKLLKEYGFCIMDNH
P11387_688	AKADAKVMKDAKTKKVVESKKKAVQRLEEQLMKLEVQATDR
P11387_712	QRLEEQLMKLEVQATDREENKQIALGTSKLNYLDPRITVAW
P11387_86	KTKHKDGSSEKHKDKHKDRDKEKRKEEKVRASGDAKIKKEK
P11387_88	KHKDGSSEKHKDKHKDRDKEKRKEEKVRASGDAKIKKEKEN
P11387_90	KDGSSEKHKDKHKDRDKEKRKEEKVRASGDAKIKKEKENGF
P11388_26	LQPVNENMQVNKIKKNEDAKKRLSVERIYQKKTQLEHILLR
P11388_261	RRAYDIAGSTKDVKVFLNGNKLPVKGFRSYVDMYLKDKLDE
P11388_265	DIAGSTKDVKVFLNGNKLPVKGFRSYVDMYLKDKLDETGNS
P11978_1166	TMETKTLPEKKQFDSIFNSNKAKIIPGNGKHASENISLSFS
P11978_1325	EVMRNEIRITSLQGDLTFTKKCLENARSQISEKDAKINKLM
P11978_1347	LENARSQISEKDAKINKLMEKDFQVNKEIKPYXXXXXXXXX
P11978_338	VASALDTNGTSATTETLTSKKIVPSPKKVAIDQDKITLHDE
P11978_345	NGTSATTETLTSKKIVPSPKKVAIDQDKITLHDEKTLAPSK
P11978_352	ETLTSKKIVPSPKKVAIDQDKITLHDEKTLAPSKHQPITSE
P12757_449	EASKSISRQSEKAHSSGKLQKTVSYPDVSLEEQEKMDLKTS
P12757_527	GLVAAASSPLLVKDVICEDDKGKIMEEVMRTYLKQQEKLNL
P12757_544	EDDKGKIMEEVMRTYLKQQEKLNLILQKKQQLQMEVKMLSS
P12757_552	EEVMRTYLKQQEKLNLILQKKQQLQMEVKMLSSSKSMKELT
P12757_569	LQKKQQLQMEVKMLSSSKSMKELTEEQQNLQKELESLQNEH
P12757_580	KMLSSSKSMKELTEEQQNLQKELESLQNEHAQRMEEFYVEQ
P12757_601	ELESLQNEHAQRMEEFYVEQKDLEKKLEQIMKQKCTCDSNL
P12954_544	DKLYELSGLKYEYLYKDGKKKNDQLEKSEPNLLNARHKNIE
P14316_31	WLEEQINSNTIPGLKWLNKEKKIFQIPWMHAARHGWDVEKD
P15806_515	IKREEKEDEEIASVADAEEDKKDLKVPRTRTSPDEDEDDLL
P15806_516	KREEKEDEEIASVADAEEDKKDLKVPRTRTSPDEDEDDLLP
P15806_540	VPRTRTSPDEDEDDLLPPEQKAEREKERRVANNARERLRVR
P16649_339	NDYYILYNPALPREIDVELHKSLDHTSVVCCVKFSNDGEYL
P16649_351	REIDVELHKSLDHTSVVCCVKFSNDGEYLATGCNKTTQVYR
P17676_315	RNLETQHKVLELTAENERLQKKVEQLSRELSTLRNLFKQLP
P17676_332	RLQKKVEQLSRELSTLRNLFKQLPEPLLASSGHCXXXXXXX
P17844_391	IHGDKSQQERDWVLNEFKHGKAPILIATDVASRGLDVEDVK
P18846_80	RRPSYRKILKDLSSEDTRGRKGDGENSGVSAAVTSMSVPTP
P20153_411	SELSVKMKRLNLDRRELSCLKAIILYNPDIRGIKSRAEIEM
P20193_1002	KPPEPRHVMDLFFDSISPTMKSLPPDLAAEGKSKIMQLVCS
P20263_121	NSEGTSSEPCADRPNAVKLEKVEPTPEESQDMKALQKELEQ
P20263_133	RPNAVKLEKVEPTPEESQDMKALQKELEQFAKLLKQKRITL
P23497_387	EGQEATCSRPQIVPEPMDFRKLSTFRESFKKRVIGQDHDFS
P23497_396	PQIVPEPMDFRKLSTFRESFKKRVIGQDHDFSESSEEEAPA
P23497_858	AKGKPNSAKKRVVKAEKSKKKKEEEEDEEDEQEEENEEDDD
P23497_859	KGKPNSAKKRVVKAEKSKKKKEEEEDEEDEQEEENEEDDDK
P23497_87	AIKKTFPFLEGLRDRDLITNKMFEDSQDSCRNLVPVQRVVY
P24385_96	EVFPLAMNYLDRFLSLEPVKKSRLQLLGATCMFVASKMKET
P27815_548	RQRQSLRKMVIDMVLATDMSKHMTLLADLKTMVETKKVTSS
P27816_368	VTLLKETERASPIKMDLAPSKDMGPPKENKKETERASPIKM
P27816_378	SPIKMDLAPSKDMGPPKENKKETERASPIKMDLAPSKDMGP
P27816_408	MDLAPSKDMGPPKENKIVPAKDLVLLSEIEVAQANDIISST
P27816_464	VALARDMTLPPETNVILTKDKALPLEAEVAPVKDMAQLPET
P27816_56	DVVGETVGKTDYIPLLDVDEKTGNSESKKKPCSETSQIEDT
P27816_590	VTPAKDVPPLSETEATPVPIKDMEIAQTQKGISEDSHLESL
P27816_599	LSETEATPVPIKDMEIAQTQKGISEDSHLESLQDVGQSAAP
P27816_634	GQSAAPTFMISPETVTGTGKKCSLPAEEDSVLEKLGERKPC
P27816_65	TDYIPLLDVDEKTGNSESKKKPCSETSQIEDTPSSKPTLLA
P27816_699	SGTGNDITTPPNKELPPSPEKKTKPLATTQPAKTSTSKAKT
P27824_87	GEVYFADSFDRGTLSGWILSKAKKDDTDDEIAKYDGKWEVE
P28324_312	LPENLSLEPKDQDSVLLEKDKVNNSSRSKKPKGLELAPTLV
P29374_1220	YMSLKSEVATIDRRRKRLKKKDREVSHAGASMSSASSDTGM
P29374_250	KEVDILNLPESELSTKPGLQKASIFLKTRVVPDNWKMDISE
P29374_256	NLPESELSTKPGLQKASIFLKTRVVPDNWKMDISEILESSS
P29374_265	KPGLQKASIFLKTRVVPDNWKMDISEILESSSSDDEDGPAE
P29374_296	SSDDEDGPAEENDEEKEKEAKKTEEEVPEEELDPEERDNFL
P29374_297	SDDEDGPAEENDEEKEKEAKKTEEEVPEEELDPEERDNFLQ
P29374_339	LYKFMEDRGTPINKPPVLGYKDLNLFKLFRLVYHQGGCDNI
P29374_345	DRGTPINKPPVLGYKDLNLFKLFRLVYHQGGCDNIDSGAVW
P29374_366	LFRLVYHQGGCDNIDSGAVWKQIYMDLGIPILNSAASYNVK
P29374_37	SAKYRGAFCEAKIKTVKRLVKVKVLLKQDNTTQLVQDDQVK
P29374_386	KQIYMDLGIPILNSAASYNVKTAYRKYLYGFEEYCRSANIQ
P29374_39	KYRGAFCEAKIKTVKRLVKVKVLLKQDNTTQLVQDDQVKGP
P29374_57	KVKVLLKQDNTTQLVQDDQVKGPLRVGAIVETRTSDGSFQE
P29374_578	KCDSEGEEDEEDMEPCLTGTKVKVKYGRGKTQKIYEASIKS
P29374_580	DSEGEEDEEDMEPCLTGTKVKVKYGRGKTQKIYEASIKSTE
P29374_582	EGEEDEEDMEPCLTGTKVKVKYGRGKTQKIYEASIKSTEID
P29374_587	EEDMEPCLTGTKVKVKYGRGKTQKIYEASIKSTEIDDGEVL
P29374_590	MEPCLTGTKVKVKYGRGKTQKIYEASIKSTEIDDGEVLYLV
P31596_236	ETMNEAPEETKIVIKKGLEFKDGMNVLGLIGFFIAFGIAMG
P31596_526	QHRMHEDIEMTKTQSVYDDTKNHRESNSNQCVYAAHNSVVI
P32333_1026	ILTLIKESNSIAAQDDINLAKMSEEAQLKRKGGLITLKILF
P32333_1260	VASRERERDFIQQMMDPSKAKPFKLPIAIKATLRKYQQDGV
P32333_1263	RERERDFIQQMMDPSKAKPFKLPIAIKATLRKYQQDGVNWL
P32333_1269	FIQQMMDPSKAKPFKLPIAIKATLRKYQQDGVNWLAFLNKY
P32333_1303	LAFLNKYHLHGILCDDMGLGKTLQTICIIASDQYLRKEDYE
P32333_144	EDHHLSSLSDWKLNEILKSGKVLLASSMNDYNVLGKADDNI
P32333_1813	THQLLDLFDPDNVTSQDNEEKNNGDSQAAKGMEDIANETGL
P32333_196	ETSMLNASDKANENKSNANKKSARMLAMARRKKKMSAKNTP
P32457_459	AKLAKLEIEMKTVFQQKVSEKEKKLQKSETELFARHKEMKE
P32457_491	FARHKEMKEKLTKQLKALEDKKKQLELSINSASPNVNHSPV
P32457_492	ARHKEMKEKLTKQLKALEDKKKQLELSINSASPNVNHSPVP
P32457_514	QLELSINSASPNVNHSPVPTKKKGFLRXXXXXXXXXXXXXX
P32457_515	LELSINSASPNVNHSPVPTKKKGFLRXXXXXXXXXXXXXXX
P32458_396	FEERVQQELLLKRQELLQREKELREIEARLEKEAKIKQEEX
P32504_759	DQMDQFELKINALLDKILEEKVTRIIEQKLGSHTGKFSTLK
P35187_1091	NCRNSANVINEERDVTEPAKKIVKLVESIQNERVTIIYCQD
P35187_1094	NSANVINEERDVTEPAKKIVKLVESIQNERVTIIYCQDVFK
P35187_1114	KLVESIQNERVTIIYCQDVFKGSRSSKIVQANHDTLEEHGI
P35187_1120	QNERVTIIYCQDVFKGSRSSKIVQANHDTLEEHGIGKSMQK
P35187_1140	KIVQANHDTLEEHGIGKSMQKSEIERIFFHLITIRVLQEYS
P35187_1173	IRVLQEYSIMNNSGFASSYVKVGPNAKKLLTGKMEIKMQFT
P35187_1179	YSIMNNSGFASSYVKVGPNAKKLLTGKMEIKMQFTISAPNS
P35187_1180	SIMNNSGFASSYVKVGPNAKKLLTGKMEIKMQFTISAPNSR
P35187_1185	SGFASSYVKVGPNAKKLLTGKMEIKMQFTISAPNSRPSTSS
P35187_1189	SSYVKVGPNAKKLLTGKMEIKMQFTISAPNSRPSTSSSFQA
P35187_1220	RPSTSSSFQANEDNIPVIAQKSTTIGGNVAANPPRFISAKE
P35187_1335	MNDSAFATLGTVEDKYRRRFKYFKATIADLSKKRSSEDHEK
P35187_43	QEDKDFVFQAIQKHIANKRPKTNSPPTTPSKDECGPGTTNF
P35712_162	MTRTEQEDSSCMEKLLSKDWKEKMERLNTSELLGEIKGTPE
P35712_250	ARQQQEQIARQQQQLLQQQHKINLLQQQIQVQGHMPPLMIP
P35712_29	PFACAADGEDAMTQDLTSREKEEGSDQHVASHLPLHPIMHN
P35712_298	TLAAAAAAQQGFLFPPGITYKPGDNYPVQFIPSTMAAAAAS
P35712_327	FIPSTMAAAAASGLSPLQLQKGHVSHPQINQRLKGLSDRFG
P36049_159	ESEDDSESENDSEEDEDVVAKEESEEKEEQEEEQDVPLSDV
P36049_19	XXMAKGFKLKELLSHQKEIEKAEKLENDLKKKKSQELKKEE
P36049_192	QDVPLSDVEFDSDADVVPHHKLTVNNTKAMKHALERVQLPW
P36049_199	VEFDSDADVVPHHKLTVNNTKAMKHALERVQLPWKKHSFQE
P36049_202	DSDADVVPHHKLTVNNTKAMKHALERVQLPWKKHSFQEHQS
P36049_213	LTVNNTKAMKHALERVQLPWKKHSFQEHQSVTSETNTDEHI
P36049_214	TVNNTKAMKHALERVQLPWKKHSFQEHQSVTSETNTDEHIK
P36049_22	AKGFKLKELLSHQKEIEKAEKLENDLKKKKSQELKKEEPTI
P36049_234	KHSFQEHQSVTSETNTDEHIKDIYDDTERELAFYKQSLDAV
P36049_248	NTDEHIKDIYDDTERELAFYKQSLDAVLVARDELKRLKVPF
P36049_262	RELAFYKQSLDAVLVARDELKRLKVPFKRPLDYFAEMVKSD
P36049_265	AFYKQSLDAVLVARDELKRLKVPFKRPLDYFAEMVKSDEHM
P36049_269	QSLDAVLVARDELKRLKVPFKRPLDYFAEMVKSDEHMDKIK
P36049_28	KELLSHQKEIEKAEKLENDLKKKKSQELKKEEPTIVTASNL
P36049_280	ELKRLKVPFKRPLDYFAEMVKSDEHMDKIKGKLIEEASDKK
P36049_289	KRPLDYFAEMVKSDEHMDKIKGKLIEEASDKKAREEARRQR
P36049_29	ELLSHQKEIEKAEKLENDLKKKKSQELKKEEPTIVTASNLK
P36049_291	PLDYFAEMVKSDEHMDKIKGKLIEEASDKKAREEARRQRQL
P36049_299	VKSDEHMDKIKGKLIEEASDKKAREEARRQRQLKKFGKQVQ
P36049_30	LLSHQKEIEKAEKLENDLKKKKSQELKKEEPTIVTASNLKK
P36049_31	LSHQKEIEKAEKLENDLKKKKSQELKKEEPTIVTASNLKKL
P36049_412	KRKNDATSSADVSGFSSRKMKGKTNRPGKSRRARRFXXXXX
P36049_414	KNDATSSADVSGFSSRKMKGKTNRPGKSRRARRFXXXXXXX
P36049_420	SADVSGFSSRKMKGKTNRPGKSRRARRFXXXXXXXXXXXXX
P36956_381	AVLRKAIDYIRFLQHSNQKLKQENLSLRTAVHKSKSLKDLV
P36956_393	LQHSNQKLKQENLSLRTAVHKSKSLKDLVSACGSGGNTDVL
P38398_1037	ENIPSTVSTISRNNIRENVFKEASSSNINEVGSSTNEVGSS
P38398_1793	TNMPTDQLEWMVQLCGASVVKELSSFTLGTGVHPIVVVQPD
P38398_193	PQKTSVYIELGSDSSEDTVNKATYCSVGDQELLQITPQGTR
P38398_459	ALICKSERVHSKSVESNIEDKIFGKTYRKKASLPNLSHVTE
P38398_734	NTSELKEFVNPSLPREEKEEKLETVKVSNNAEDPKDLMLSG
P38398_739	KEFVNPSLPREEKEEKLETVKVSNNAEDPKDLMLSGERVLQ
P38398_812	GKAKTEPNKCVSQCAAFENPKGLIHGCSKDNRNDTEGFKYP
P38904_1041	NVETAKETQSVQEIKENVGTKASEEVTLTEDKTNGDPKNEK
P38904_1095	KKPGEKIATDLNEDASLSDKKDGDEKSTLHSDAAQLTGNEP
P38904_1126	DAAQLTGNEPDSVNTTTGKPKLIDVSLKPLNEAKPKIPIIF
P38904_1170	RPQIKPEVSVINLVQNLVNTKIPEIKNESVDLGSNITDILS
P38904_1175	PEVSVINLVQNLVNTKIPEIKNESVDLGSNITDILSSTITN
P38904_1206	TDILSSTITNILPEITATDVKNYQYEDENVKYLKKTPRQVL
P38904_1216	ILPEITATDVKNYQYEDENVKYLKKTPRQVLNLDGLVPPSG
P38904_220	HEHAAPNDKLSSKKSSKKKKKDKSKNRESSKDKSSKKSKSS
P38904_224	APNDKLSSKKSSKKKKKDKSKNRESSKDKSSKKSKSSSHSK
P38904_587	LTEVPSKPKKPSKTEVSLEKKLRKKYVSIANEAASVARKKR
P38904_590	VPSKPKKPSKTEVSLEKKLRKKYVSIANEAASVARKKRWAK
P38904_591	PSKPKKPSKTEVSLEKKLRKKYVSIANEAASVARKKRWAKN
P38904_690	KKPYRRWTPEELLKRSQEAEKPRKVKKERKKKEKKMKVPSS
P38904_693	YRRWTPEELLKRSQEAEKPRKVKKERKKKEKKMKVPSSALK
P38904_695	RWTPEELLKRSQEAEKPRKVKKERKKKEKKMKVPSSALKKI
P38904_883	AAGATPEEARKRLATIIQHAKSTVIRAALQARKNSMQAAHS
P38904_895	LATIIQHAKSTVIRAALQARKNSMQAAHSKGTTTELATTAS
P38904_904	STVIRAALQARKNSMQAAHSKGTTTELATTASRMKNPLKMI
P38904_918	MQAAHSKGTTTELATTASRMKNPLKMIPIFNTSRVKQQLDK
P40381_143	GCKQLIEAYWNEHGGRPEPSKRKRTARPKKPEAKEPSPKSR
P40460_305	ESYKSFLKLEDNYEPSMQELKLGFEKFVHIINTDIANLQTQ
P40460_425	ILRKKGISTEQFELQNQEREKLTRELDKINIQSDKLTSSIK
P40460_551	EIQERIKTIEKDNITLEKDIKNLKHDINEKTQINEKLELEL
P40460_554	ERIKTIEKDNITLEKDIKNLKHDINEKTQINEKLELELSEA
P40460_560	EKDNITLEKDIKNLKHDINEKTQINEKLELELSEANSKFEL
P40460_566	LEKDIKNLKHDINEKTQINEKLELELSEANSKFELSKQENE
P40460_577	INEKTQINEKLELELSEANSKFELSKQENERLLVAQRIEIE
P40460_582	QINEKLELELSEANSKFELSKQENERLLVAQRIEIEKMEKK
P40460_598	FELSKQENERLLVAQRIEIEKMEKKINDSNLLMKTKISDAE
P40460_613	RIEIEKMEKKINDSNLLMKTKISDAEELVTSTELKLEELKV
P40460_627	NLLMKTKISDAEELVTSTELKLEELKVDLNRKRYKLHQQVI
P40460_632	TKISDAEELVTSTELKLEELKVDLNRKRYKLHQQVIHVIDI
P40460_638	EELVTSTELKLEELKVDLNRKRYKLHQQVIHVIDITSKFKI
P40460_641	VTSTELKLEELKVDLNRKRYKLHQQVIHVIDITSKFKINIQ
P42224_152	STVMLDKQKELDSKVRNVKDKVMCIEHEIKSLEDLQDEYDF
P42224_161	ELDSKVRNVKDKVMCIEHEIKSLEDLQDEYDFKCKTLQNRE
P42224_173	VMCIEHEIKSLEDLQDEYDFKCKTLQNREHETNGVAKSDQK
P42224_240	LLNVTELTQNALINDELVEWKRRQQSACIGGPPNACLDQLQ
P42224_278	QLQNWFTIVAESLQQVRQQLKKLEELEQKYTYEHDPITKNK
P42224_279	LQNWFTIVAESLQQVRQQLKKLEELEQKYTYEHDPITKNKQ
P42575_15	XXXXXXMAAPSAGSWSTFQHKELMAADRGRRILGVCGMHPH
P42575_153	SCDYDLSLPFPVCESCPLYKKLRLSTDTVEHSLDNKDGPVC
P42575_168	CPLYKKLRLSTDTVEHSLDNKDGPVCLQVKPCTPEFYQTHF
P48552_127	NLNVKKEALLAGMVDSVPKGKQDSTLLASLLQSFSSRLQTV
P48552_158	QSFSSRLQTVALSQQIRQSLKEQGYALSHDSLKVEKDLRCY
P48552_40	YLEGLLMHQAAGGSGTAVDKKSAGHNEEDQNFNISGSAFPT
P48552_677	GNTDKPIGMIDRLNSPLLSNKTNAVEENKAFSSQPTGPEPG
P49750_2042	EQKEEKKDAEEEESELGYIPKSKWEMDTSEAKLDKLDGLRT
P49750_2056	ELGYIPKSKWEMDTSEAKLDKLDGLRTGTKRKRDWEAIASR
P49756_462	ERRKLERKLREKEAAYQERLKNWEIRERKKTREYEKEAERE
P49756_671	ENSPDQQQPEEHRPKIGLSLKLGASNSPGQPNSVKRKKLPV
P50552_361	YSDLQRVKQELLEEVKKELQKVKEEIIEAFVQELRKRGSPX
P52739-2_79	FYKFFQEFTQEPLVEIEGVSKMAFRHLIEFTYTAKLMIQGE
P53067_487	LDKFIDALPDIKPLTSAFLAKSLNLALKSDKELIKSATLIA
P54132_1270	AESLSSDPEVLLQIDGVTEDKLEKYGAEVISVLQKYSEWTS
P54132_1273	LSSDPEVLLQIDGVTEDKLEKYGAEVISVLQKYSEWTSPAE
P54132_1284	DGVTEDKLEKYGAEVISVLQKYSEWTSPAEDSSPGISLSSS
P54132_129	PDFLQTPKEVVCTTQNTPTVKKSRDTALKKLEFSSSPDSLS
P54274_277	MKAAAKVVESKRTRTITSQDKPSGNDVEMETEANLDTRKSV
P54274_295	QDKPSGNDVEMETEANLDTRKSVSDKQSAVTESSEGTVSLL
P55055_239	LTAAQELMIQQLVAAQLQCNKRSFSDQPKVTPWPLGADPQS
P55055_286	RFAHFTELAIISVQEIVDFAKQVPGFLQLGREDQIALLKAS
P56524_1067	TCENEEAETVTAMASLSVGVKPAEKRPDEEPMEEEPPLXXX
P56524_1071	EEAETVTAMASLSVGVKPAEKRPDEEPMEEEPPLXXXXXXX
P56524_113	FQRQHEQLSRQHEAQLHEHIKQQQEMLAMKHQQELLEHQRK
P56524_122	RQHEAQLHEHIKQQQEMLAMKHQQELLEHQRKLERHRQEQE
P56524_133	KQQQEMLAMKHQQELLEHQRKLERHRQEQELEKQHREQKLQ
P56524_791	ARLAVGCVVELVFKVATGELKNGFAVVRPPGHHAEESTPMG
P61289_195	YLDQISRYYITRAKLVSKIAKYPHVEDYRRTVTEIDEKEYI
P63000_147	EKLKEKKLTPITYPQGLAMAKEIGAVKYLECSALTQRGLKT
P63015_207	TNSISSNGEDSDEAQMRLQLKRKLQRNRTSFTQEQIEALEK
Q01826_241	NSTYYANVSAAKCQEFGRWYKHFKKTKDMMVEMDSLSELSQ
Q01826_244	YYANVSAAKCQEFGRWYKHFKKTKDMMVEMDSLSELSQQGA
Q02750_70	LEAFLTQKQKVGELKDDDFEKISELGAGNGGVVFKVSHKPS
Q03188_134	HEVHQKILATDVSSKNTPDSKKISSRNINDHHSEADEEFYL
Q03330_207	GYGAHLMNHLKDYVRNTSNIKYFLTYADNYAIGYFKKQGFT
Q04322_574	KYSSEYEEIHRLDNEKEVQYKSITEKNLHLQKHVRKLENDY
Q04322_589	KEVQYKSITEKNLHLQKHVRKLENDYTSLNREHVTIANELV
Q04322_634	NIESVLNENNGYKLQILDLKKKLDSEKKKQVLGVYVPNDLK
Q05193_675	LERQVETIRNLVDSYMAIVNKTVRDLMPKTIMHLMINNTKE
Q05397_131	YELAHPPEEWKYELRIRYLPKGFLNQFTEDKPTLNFFYQQV
Q05397_141	KYELRIRYLPKGFLNQFTEDKPTLNFFYQQVKSDYMLEIAD
Q05397_170	QVKSDYMLEIADQVDQEIALKLGCLEIRRSYWEMRGNALEK
Q05397_19	XXMAAAYLDPNLNHTPNSSTKTHLGTGMERSPGAMERVLKV
Q05397_190	KLGCLEIRRSYWEMRGNALEKKSNYEVLEKDVGLKRFFPKS
Q05397_76	IRHGDATDVRGIIQKIVDSHKVKHVACYGFRLSHLRSEEVH
Q05397_78	HGDATDVRGIIQKIVDSHKVKHVACYGFRLSHLRSEEVHWL
Q07657_15	XXXXXXMSTASTPPINLFRRKKEHKRGITYTMLLCGPAGTG
Q07657_171	EVMSYLEQQFDIVLAEETRIKRNPRFEDTRVHVALYFIEPT
Q07657_19	XXMSTASTPPINLFRRKKEHKRGITYTMLLCGPAGTGKTAF
Q07657_47	LLCGPAGTGKTAFANNLLETKIFPHKYQYGKSNASISSNPE
Q07657_478	NISETVPYVLRHERILARQQKLEELEAQSAKELQKRIQELE
Q07657_488	RHERILARQQKLEELEAQSAKELQKRIQELERKAHELKLRE
Q07657_492	ILARQQKLEELEAQSAKELQKRIQELERKAHELKLREKLIN
Q07657_57	TAFANNLLETKIFPHKYQYGKSNASISSNPEVKVIAPTKVV
Q07666_206	RLQEETGAKISVLGKGSMRDKAKEEELRKGGDPKYAHLNMD
Q07666_208	QEETGAKISVLGKGSMRDKAKEEELRKGGDPKYAHLNMDLH
Q07666_214	KISVLGKGSMRDKAKEEELRKGGDPKYAHLNMDLHVFIEVF
Q07666_219	GKGSMRDKAKEEELRKGGDPKYAHLNMDLHVFIEVFGPPCE
Q07666_252	EVFGPPCEAYALMAHAMEEVKKFLVPDMMDDICQEQFLELS
Q07666_424	VQDSYEAYGQDDWNGTRPSLKAPPARPVKGAYREHPYGRYX
Q07666_432	GQDDWNGTRPSLKAPPARPVKGAYREHPYGRYXXXXXXXXX
Q07979_100	FENGEYEPIQGGFYKLYHDIKLVCTILIHFYPQGTRNYQLV
Q07979_125	ILIHFYPQGTRNYQLVDKFYKFSSELLLRECCRIGIALTQT
Q09472_1045	EEEDQPSTSATQSSPAPGQSKKKIFKPEELRQALMPTLEAL
Q09472_1046	EEDQPSTSATQSSPAPGQSKKKIFKPEELRQALMPTLEALY
Q09472_1488	KKMLDKAVSERIVHDYKDIFKQATEDRLTSAKELPYFEGDF
Q09472_1499	IVHDYKDIFKQATEDRLTSAKELPYFEGDFWPNVLEESIKE
Q09472_1518	AKELPYFEGDFWPNVLEESIKELEQEEEERKREENTSNEST
Q09472_1772	NCSLPSCQKMKRVVQHTKGCKRKTNGGCPICKQLIALCCYH
Q09472_1774	SLPSCQKMKRVVQHTKGCKRKTNGGCPICKQLIALCCYHAK
Q12216_199	GCTKMKFKVSKSNHDLLKSNKSYKLYLFSGFSIPFIYETVG
Q12216_202	KMKFKVSKSNHDLLKSNKSYKLYLFSGFSIPFIYETVGHEA
Q12216_667	SAAHLPPYIHVSTSGHGDDGKIRKRRHSNVSIYIPKNPYAT
Q12223_139	TNTSEVKYTVVAEAQVKVTLKDGTNTQCGGLGRITLSSRGE
Q12223_223	SKKIKNEANTNYNLLSATNSKPTFIKLEDAKGTHIKXXXXX
Q12223_233	NYNLLSATNSKPTFIKLEDAKGTHIKXXXXXXXXXXXXXXX
Q12772_660	KVFQCRRATPATEAGFEDEAKTSARDAALAYHRLHQLHITG
Q12772_725	EEKIPPSTLVEIHLTAAMGLKTRCGGKLGFLASYFLSRAQS
Q12772_731	STLVEIHLTAAMGLKTRCGGKLGFLASYFLSRAQSLCGPEH
Q12772_823	FCKNLLERAIESLVKPQAKKKAGDQEEESCEFSSALEYLKL
Q12772_865	HSFVDSVGVMSPPLSRSSVLKSALGPDIICRWWTSAITVAI
Q12772_934	SPLVKAIFHACRAMHASLPGKADGQQSSFCHCERASGHLWS
Q12948_181	MFENGSFLRRRRRFKKKDAVKDKEEKDRLHLKEPPPPGRQP
Q12948_183	ENGSFLRRRRRFKKKDAVKDKEEKDRLHLKEPPPPGRQPPP
Q12948_186	SFLRRRRRFKKKDAVKDKEEKDRLHLKEPPPPGRQPPPAPP
Q12948_192	RRFKKKDAVKDKEEKDRLHLKEPPPPGRQPPPAPPEQADGN
Q12948_74	EQYPGGMARAYGPYTPQPQPKDMVKPPYSYIALITMAIQNA
Q12948_98	KPPYSYIALITMAIQNAPDKKITLNGIYQFIMDRFPFYRDN
Q13129_1007	KIKTKDLFPSLGNEHNQTTEKLDAEPKPCSDTNSDSPDEGL
Q13129_1068	ICASKRPCTEDTMLELLLRLKHLSLKNSITHGSFSGSLQGY
Q13129_1125	LNFQNQDENMPSQYLAQLAAKPFFCELQGCKYEFVTREALL
Q13129_1194	CHICQRSFTRKTHLRIHYKNKHQIGSDRATHKLLDNEKCDH
Q13129_1205	THLRIHYKNKHQIGSDRATHKLLDNEKCDHEGPCSVDRLKG
Q13129_1211	YKNKHQIGSDRATHKLLDNEKCDHEGPCSVDRLKGDCSAEL
Q13129_1241	DRLKGDCSAELGGDPSSNSEKPHCHPKKDECSSETDLESSC
Q13129_1248	SAELGGDPSSNSEKPHCHPKKDECSSETDLESSCEETESKT
Q13129_1296	GSHREEQEGREGRGSRRTVAKGNLCYILNKYHKPFHCIHKT
Q13129_1305	REGRGSRRTVAKGNLCYILNKYHKPFHCIHKTCNSSFTNLK
Q13129_1308	RGSRRTVAKGNLCYILNKYHKPFHCIHKTCNSSFTNLKGLI
Q13129_1357	YNKEQLCLEKDKARTKRELVKCKKIFACKYKECNKRFLCSK
Q13129_1492	YYDDLFRSQKVANERLLRSEKVCQTADTQGHEHQTTRRSFN
Q13129_1531	FNAKSKKCGLIKEKKAPISFKTRAEALHMCVEHSEHTQYPC
Q13129_1561	VEHSEHTQYPCMVQGCLSVVKLESSIVRHYKRTHQMSSAYL
Q13129_1571	CMVQGCLSVVKLESSIVRHYKRTHQMSSAYLEQQMENLVVC
Q13129_1593	THQMSSAYLEQQMENLVVCVKYGTKIKEEPPSEADPCIKKE
Q13129_1611	CVKYGTKIKEEPPSEADPCIKKEENRSCESERTEHSHSPGD
Q13129_1612	VKYGTKIKEEPPSEADPCIKKEENRSCESERTEHSHSPGDS
Q13129_1696	HSSKTTSLEQCNIVQPPPPCKIENSIPNPNGTESGTYFTSF
Q13129_1724	PNGTESGTYFTSFQLPLPRIKESETRQHSSGQENTVKNPTH
Q13129_1740	LPRIKESETRQHSSGQENTVKNPTHVPKENFRKHSQPRSFD
Q13129_1747	ETRQHSSGQENTVKNPTHVPKENFRKHSQPRSFDLKTYKPM
Q13129_1752	SSGQENTVKNPTHVPKENFRKHSQPRSFDLKTYKPMGFESS
Q13129_1762	PTHVPKENFRKHSQPRSFDLKTYKPMGFESSFLKFIQESEE
Q13129_1765	VPKENFRKHSQPRSFDLKTYKPMGFESSFLKFIQESEEKED
Q13129_1775	QPRSFDLKTYKPMGFESSFLKFIQESEEKEDDFDDWEPSEH
Q13129_185	LEFGNNNLQILVHVTKEGVWKNPVLLKILSQQPVETEEVNK
Q13129_1866	LIVAETTTVPSLENLRVVLDKALTDCGELALKQLHYLRPVV
Q13129_1892	GELALKQLHYLRPVVVLERSKFSTPILDLFPTKKTDELCVG
Q13129_220	TEEVNKLIAQEGPSFLQMRIKHLLKSNCIPQATALSKLCAE
Q13129_277	CLCSMLPNEDAIKEIAKVDCKEVLDIICNLESEGQDNTAFV
Q13129_324	TQQLQTASVYCSWELTLFWSKLQRRIDPSLDTFLERCRQFG
Q13129_554	EKRDKKPIGSSERYQRWLQYKFFCLLCKRECIEARILHHSK
Q13129_561	IGSSERYQRWLQYKFFCLLCKRECIEARILHHSKMHMEDGI
Q13129_574	KFFCLLCKRECIEARILHHSKMHMEDGIYTCPVCIKKFKRK
Q13129_589	ILHHSKMHMEDGIYTCPVCIKKFKRKEMFVPHVMEHVKMPP
Q13129_590	LHHSKMHMEDGIYTCPVCIKKFKRKEMFVPHVMEHVKMPPS
Q13129_592	HSKMHMEDGIYTCPVCIKKFKRKEMFVPHVMEHVKMPPSRR
Q13129_594	KMHMEDGIYTCPVCIKKFKRKEMFVPHVMEHVKMPPSRRDR
Q13129_606	VCIKKFKRKEMFVPHVMEHVKMPPSRRDRSKKKLLLKGSQK
Q13129_616	MFVPHVMEHVKMPPSRRDRSKKKLLLKGSQKGICPKSPSAI
Q13485_436	REAGRAPGDAVHKIYPSAYIKVFDLRQCHRQMQQQAATAQA
Q13569_122	FKVKRKVDRFNGVSEAELLTKTLPDILTFNLDIVIIGINPG
Q14151_562	KEEKDQDELKPGPTNRSRVTKSGSRGMERTVVMDKSKGEPV
Q14151_576	NRSRVTKSGSRGMERTVVMDKSKGEPVISVKTTSRSKERSS
Q14151_578	SRVTKSGSRGMERTVVMDKSKGEPVISVKTTSRSKERSSKS
Q14151_586	RGMERTVVMDKSKGEPVISVKTTSRSKERSSKSQDRKSESK
Q14191_1170	QETQIVLYGKLVEARQKHANKMDVPPAILATNKILVDMAKM
Q14191_1182	EARQKHANKMDVPPAILATNKILVDMAKMRPTTVENVKRID
Q14191_1189	NKMDVPPAILATNKILVDMAKMRPTTVENVKRIDGVSEGKA
Q14191_1199	ATNKILVDMAKMRPTTVENVKRIDGVSEGKAAMLAPLLEVI
Q14191_266	LLSDMNKQLTSISEEVMDLAKHLPHAFSKLENPRRVSILLK
Q14191_775	VKTSSHWEFEGPTIIYCPSRKMTQQVTGELRKLNLSCGTYH
Q14191_786	PTIIYCPSRKMTQQVTGELRKLNLSCGTYHAGMSFSTRKDI
Q14526_444	LAYGEPESFGDNLYVCIPCGKGFPSSEQLNAHVEAHVEEEE
Q14676_1958	LCALGRGIPILSLDWLHQSRKAGFFLPPDEYVVTDPEQEKN
Q14676_1977	RKAGFFLPPDEYVVTDPEQEKNFGFSLQDALSRARERRLLE
Q14676_2034	MGEIISCCGGTYLPSMPRSYKPQRVVITCPQDFPHCSIPLR
Q14676_2071	IPLRVGLPLLSPEFLLTGVLKQEAKPEAFVLSPLEMSSTXX
Q14676_2075	VGLPLLSPEFLLTGVLKQEAKPEAFVLSPLEMSSTXXXXXX
Q14676_246	QQPATEEASSAARRGATVEAKQSEAEVVTEIQLEKDQPLVK
Q14676_260	GATVEAKQSEAEVVTEIQLEKDQPLVKERDNDTKVKRGAGN
Q14676_266	KQSEAEVVTEIQLEKDQPLVKERDNDTKVKRGAGNGVVPAG
Q14676_349	SDTDAEEERIPATPVVIPMKKRKIFHGVGTRGPGAPGLAHL
Q14676_351	TDAEEERIPATPVVIPMKKRKIFHGVGTRGPGAPGLAHLQE
Q14676_384	PGLAHLQESQAGSDTDVEEGKAPQAVPLEKSQASMVINSDT
Q14676_45	RCNVEPVGRLHIFSGAHGPEKDFPLHLGKNVVGRMPDCSVA
Q14676_472	DSDTDVEEEELPVENREAVLKDHTKIRALVRAHSEKDQPPF
Q14676_561	HQVSVEGTNQTDVKAVGGPAKLLVVSLEEAWPLHGDCETDA
Q14676_682	QREGAQVPTGREREQHVGGTKDSEDNYGDSEDLDLQATQCF
Q14676_73	KNVVGRMPDCSVALPFPSISKQHAEIEILAWDKAPILRDCG
Q14676_812	ESPVHTEPMGIQGRGRQTVDKVMGIPKETAERVGPERGPLE
Q14676_818	EPMGIQGRGRQTVDKVMGIPKETAERVGPERGPLERETEKL
Q14676_856	EKLLPERQTDVTGEEELTKGKQDREQKQLLARDTQRQESDK
Q14831_382	VWFAEYWEENFNCKLTISGSKKEDTDRKCTGQERIGKDSNY
Q14831_389	EENFNCKLTISGSKKEDTDRKCTGQERIGKDSNYEQEGKVQ
Q14831_398	ISGSKKEDTDRKCTGQERIGKDSNYEQEGKVQFVIDAVYAM
Q14980_1131	AAGRTEPTGPKLEALRAEVSKLEQQCQKQQEQADSLERSLE
Q14980_122	LLYHSTMSSKSPRDWEQFEYKIQAELAVILKFVLDHEDGLN
Q14980_563	EQASQGLRHQVEQLSSSLKQKEQQLKEVAEKQEATRQDHAQ
Q14980_722	EQLQALKESLKVTKGSLEEEKRRAADALEEQQRCISELKAE
Q14980_73	LKQPVSERLDFVCSFLQKNRKHPSSPECLVSAQKVLEGSEL
Q15326_479	NDGVCQSMCHDKYTKIFNDFKDRMKSDHKRETERVVREALE
Q15596_751	KQEPVSPKKKENALLRYLLDKDDTKDIGLPEITPKLERLDS
Q15596_755	VSPKKKENALLRYLLDKDDTKDIGLPEITPKLERLDSKTDP
Q15744_70	EEQLLSDLFAVKPAPEARGLKGPGTPAFPHYLPPDPRPFAY
Q15788_1015	YSSPSPTANLPSPFQGMVRQKPSLGTMPVQVTPPRGAFSPG
Q16665_377	TECVLKPVESSDMKMTQLFTKVESEDTSSLFDKLKKEPDAL
Q16666_134	TVKTEGAEATPGAQKRKKSTKEKAGPKGSKVSEEQTQPPSP
Q16666_391	KKNQMSKLISEMHSFIQIKKKTNPRNNDPKSMKLPQEQRQL
Q24151_241	MLNSTSSPNAEAAYRSLIDEKAAIVLTMRRSFMYYESLHEM
Q2TB10_448	QNELKGTNHSNEKKNTPAAQKNKVKQDSESPKSTSPSAAGG
Q2TB10_452	KGTNHSNEKKNTPAAQKNKVKQDSESPKSTSPSAAGGQQKT
Q2TB10_459	EKKNTPAAQKNKVKQDSESPKSTSPSAAGGQQKTRKPKLSA
Q2TB10_471	VKQDSESPKSTSPSAAGGQQKTRKPKLSAGFDFKQLYCKLC
Q2TB10_474	DSESPKSTSPSAAGGQQKTRKPKLSAGFDFKQLYCKLCKRQ
Q2TB10_476	ESPKSTSPSAAGGQQKTRKPKLSAGFDFKQLYCKLCKRQFT
Q2TB10_484	SAAGGQQKTRKPKLSAGFDFKQLYCKLCKRQFTSKQNLTKH
Q2TB10_599	RDEAKHSDSKHDGTSNSPSKKYEVADVGIEVKVTKNFSLHR
Q2TB10_610	DGTSNSPSKKYEVADVGIEVKVTKNFSLHRCNKCGKAFAKK
Q2TB10_622	VADVGIEVKVTKNFSLHRCNKCGKAFAKKTYLEHHKKTHKA
Q4LE39_186	RKQIDELLGKVVCVDYISLDKKKALWFPALVVCPDCSDEIA
Q5SVZ6_48	PDNAQEYCHRQQSRTQENELKINAVFSESASQLTAGIQLSL
Q5SVZ6_676	KEQLSICVRYPQKSSKAILIKERFLGFVDTEEMTGTHLHRT
Q5VZL5_1401	NTLLFFNTKYFQLKNVTEHLKLSFAHVMRRTRTLKYSTKMT
Q60864_237	DLPENKKQALKEKELGNDAYKKKDFDKALKHYDRAKELDPT
Q60974_294	VYHENIKTNQVMRKKLILFFKRRNHARKQREQKICQRYDQL
Q60974_301	TNQVMRKKLILFFKRRNHARKQREQKICQRYDQLMEAWEKK
Q60974_306	RKKLILFFKRRNHARKQREQKICQRYDQLMEAWEKKVDRIE
Q60974_488	RKSVPDCVLYYYLTKKNENYKALVRRNYGKRRGRNQQIARP
Q61183_360	EFKQGLAITDEILLSKAEWSKLFEAPNFFQKYKHYIVLLAS
Q61183_370	EILLSKAEWSKLFEAPNFFQKYKHYIVLLASAPTEKQRLEW
Q61183_372	LLSKAEWSKLFEAPNFFQKYKHYIVLLASAPTEKQRLEWVG
Q61183_397	LLASAPTEKQRLEWVGLVESKIRILVGSLEKNEFITLAHVN
Q61183_407	RLEWVGLVESKIRILVGSLEKNEFITLAHVNPQSFPAPKES
Q61183_41	GITSPISLAAPKETDCLLTQKLIETLKPFGVFEEEEELQRR
Q61183_425	LEKNEFITLAHVNPQSFPAPKESPDREEFRTMWVIGLVFKK
Q61183_635	VVSSTRLVNPSPRPSGNTATKVPNPIVGVKRTSSPNKEESP
Q61624_398	LEDASGEIHPPKLVLKKINSKRSLKQPLEQSQTISPLSSYE
Q61624_424	PLEQSQTISPLSSYEDSKVSKYAFELVDKQALLDSEGSADI
Q62915_285	ITVYEALNHPWLKERDRYAYKIHLPETVEQLRKFNARRKLK
Q62915_802	DISNNEYLEYGSHEDAMYGTKLETIRKIHEQGLIAILDVEP
Q62915_808	YLEYGSHEDAMYGTKLETIRKIHEQGLIAILDVEPQALKVL
Q63120_1314	GEIQFNNYQVRYRPELDLVLKGITCNIKSGEKVGVVGRTGA
Q63120_293	GLNKKQSQSQDVLVLEEAKKKSEKTTKDYPKSWLIKSLFKT
Q63120_340	KSFILKLIHDLLVFLNPQLLKLLIGFVKSSNSYVWFGYICA
Q6NZI2_165	LLRRRNFKVMIYQDEVKLPAKLSISKSLKESEALPEKEGEE
Q6NZI2_170	NFKVMIYQDEVKLPAKLSISKSLKESEALPEKEGEELGEGE
Q75MX6_334	GPLIQNVHASKRILFSIVHDKSEKWDAFIKETEDINTLREC
Q75MX6_410	VGIPDKIPFKRPCTYGVPKLKRILEERHSIHFIIKRMFDER
Q75MX6_439	IHFIIKRMFDERIFTGNKFTKDTTKLEPASPPEDTSAEVSR
Q86U86_1266	PTEIPENDILLCESRYNESDKQMKKFKGLKRFSLSAKVVDD
Q86U86_1270	PENDILLCESRYNESDKQMKKFKGLKRFSLSAKVVDDEIYY
Q86U86_1275	LLCESRYNESDKQMKKFKGLKRFSLSAKVVDDEIYYFRKPI
Q86U86_128	DVNLLTADFQLLFNNAKSYYKPDSPEYKAACKLWDLYLRTR
Q86U86_1282	NESDKQMKKFKGLKRFSLSAKVVDDEIYYFRKPIVPQKEPS
Q8IX12_558	VCTQWYRFAEIRYHRPEETHKGRTVPAHVETVVLFFPDVWH
Q8IX12_594	PDVWHCLPTRSEWETLSRGYKQQLVEKLQGERKEADGEQDE
Q8IYA6_356	YPSLLQGEYNNRHPNIKQDQKSSQVCIPQTSCVLQKSKAIS
Q8IYA6_371	IKQDQKSSQVCIPQTSCVLQKSKAISQRPNLTVGRFNSAIP
Q8IYA6_373	QDQKSSQVCIPQTSCVLQKSKAISQRPNLTVGRFNSAIPST
Q8IYA6_424	NKHNNNGFQQKAQTLDSKLKKAVPQNHFLNKTAPKTQADVT
Q8IYA6_434	KAQTLDSKLKKAVPQNHFLNKTAPKTQADVTTVNGTQTNPN
Q8IYA6_563	NILSSIPEAEKFAKFWICKAKLLASKGTFDVIGLYEEAIKN
Q8IYA6_57	YLKSKNNCQNQPPSKSTIRPKNDVTNHVVLPVKPKRSISIK
Q8IYA6_582	AKLLASKGTFDVIGLYEEAIKNGATPIQELRKVVLNILQDS
Q8IYA6_593	VIGLYEEAIKNGATPIQELRKVVLNILQDSNRTTEGITSDS
Q8IZQ8_264	GDSKNRHKKPKDPKPKVKKLKYHQYIPPDQKAEKSPPPMDS
Q8N2W9_330	DPDSEIATTGVRVSLICPLVKMRLSVPCRAETCAHLQCFDA
Q8N2W9_57	ELVTRALQLVQFDCSPELFKKIKELYETRYAKKNSEPAPQP
Q8N4C6_186	PDDLNASQSGSSPPQDWIEEKLQEVCEDLGITRDGHLNRKK
Q8N4C6_2062	EVEQKLKLVKRLLQEKVNQLKEQVSLPGHLCSPTSHSSFNS
Q8N4C6_265	GLFKNGKSLTPSASTPYRQLKRHLSMQSFDESGRRTTTSSA
Q8N4C6_327	VERILDTWQEEGIENSQEILKALDFSLDGNINLTELTLALE
Q8N4C6_354	DGNINLTELTLALENELLVTKNSIHQAALASFKAEIRHLLE
Q8N680_240	TNLEASSSDEQPASLTIAHVKPSIMKRNGSFPKYYACHLCG
Q8N680_245	SSSDEQPASLTIAHVKPSIMKRNGSFPKYYACHLCGRRFTL
Q8N680_252	ASLTIAHVKPSIMKRNGSFPKYYACHLCGRRFTLRSSLREH
Q8N680_359	PPSDIADIDNLEQADQEREVKRRKYECTICGRKFIQKSHWR
Q8N680_362	DIADIDNLEQADQEREVKRRKYECTICGRKFIQKSHWREHM
Q8N680_397	HWREHMYIHTGKPFKCSTCDKSFCRANQAARHVCLNQSIDT
Q8N680_446	LELCTFEEGSQMDNMLVQTNKPYKCNLCDKTFSTPNEVVKH
Q8NAP3_1017	NQGRPHRHLTSRPYACELCAKQFQSPSTLKMHMRCHTGEKP
Q8NAP3_1109	TGEKRYHCQFCFQRFLYLSTKRNHEQRHIREHNGKGYACFQ
Q8ND82_188	NTSYVLKHPSTSKVNSVTPKKPKTSEDVPQINPSTSLPLIG
Q8NEB9_404	LRQADDEDLLMYLLQLVQALKYENFDDIKNGLEPTKKDSQS
Q8NEB9_412	LLMYLLQLVQALKYENFDDIKNGLEPTKKDSQSSVSENVSN
Q8NEB9_624	IIPETATLFKSALMPAQLFFKTEDGGKYPVIFKHGDDLRQD
Q8NEB9_630	TLFKSALMPAQLFFKTEDGGKYPVIFKHGDDLRQDQLILQI
Q8NEB9_636	LMPAQLFFKTEDGGKYPVIFKHGDDLRQDQLILQIISLMDK
Q8NEB9_656	KHGDDLRQDQLILQIISLMDKLLRKENLDLKLTPYKVLATS
Q8NHM5_225	QHLKEKQTEATNAIAEMKYPKVKKYCLMSVKGCFTDFHIDF
Q8NHM5_227	LKEKQTEATNAIAEMKYPKVKKYCLMSVKGCFTDFHIDFGG
Q8TAD8_359	LNNKRIEPQRYYELKEKDVLKFGFSSREYVLLHESSDTSEI
Q8TAD8_382	FSSREYVLLHESSDTSEIDRKDDEDEEEEEEVSDSXXXXXX
Q8TEQ6_470	KVGLYDTYSNKPPQISSTYHKKTVYTLAWGPPVPPMSLGGE
Q8TEQ6_641	SPESPVTITEPYRTLSGHTAKITSVAWSPHHDGRLVSASYD
Q8TEQ6_709	AWSPLDPDCIYSGADDFCVHKWLTSMQDHSRPPQGKKSIEL
Q8TEQ6_724	DFCVHKWLTSMQDHSRPPQGKKSIELEKKRLSQPKAKPKKK
Q8WXI9_155	SPRSSSRMEERLKAANLEMFKGKGIEERQQLIKQLRDELRL
Q8WXI9_157	RSSSRMEERLKAANLEMFKGKGIEERQQLIKQLRDELRLEE
Q8WXI9_224	QNAASIVQPSPAHVGQQGLSKLPSRPGAQGVEPQNLRTLQG
Q8WXI9_281	MSQRVIAPNPAQLQGQRGPPKPGLVRTTTPNMNPAINYQPQ
Q8WXI9_407	EFIYMVGLEEVVQSVIDSQGKSCASLLRVEPFVCAQCRTDF
Q91ZP3_121	MYLATSPILSEGAARMESQLKRNSVDRIRCLDPTTAAQGLP
Q91ZP3_514	DLPSIAISLCGGLSDHREITKDAFLEQAVSYQQFADNPAII
Q91ZP3_63	LQCSPFHVRFGKMGVLRSREKVVDIEINGESVDLHMKLGDN
Q91ZP3_79	RSREKVVDIEINGESVDLHMKLGDNGEAFFVQETDNDQEII
Q91ZP3_808	LSPSSLFSALHREVIEKKPEKFKVQCLTDIKNLFFPNTEPF
Q91ZP3_888	TNISSYVRLCEVVDHVFPLLKRSHSCDFPCSDTFSNFTFWR
Q92317_107	EILLNFKGSQKVKETRDSKFKKSGLSEEELLRQQEELFRQS
Q92317_108	ILLNFKGSQKVKETRDSKFKKSGLSEEELLRQQEELFRQSR
Q92766_373	LPGDALDQKGFLALLGLQHTKDVRPAPAEEPLPDDNQAIQL
Q92766_397	PAPAEEPLPDDNQAIQLQTLKCQLPQDPGCTNLLSLSPFEA
Q92766_41	MSAVMSVGKVTENGGSPQGIKSPSKPPGPNRIGRRNQETKE
Q92766_431	SLSPFEAASLGGSLTVLPATKDSIKHLSLQPFQKGFIIQPD
Q92766_548	INAQQASPGCISPSLPPPPLKLLKGSVEAASNAHLLQSKSG
Q92797_233	LDRIPRDHPYIQYNVLWEEGKAALEQLLKFMVHPAISSINL
Q92797_359	MPSSKDTRKRPRDDSDSTLKKMKLEPNLGEDDEDKDLEPGP
Q92797_384	PNLGEDDEDKDLEPGPSGTSKASAQISGQSDTDITAEFLQP
Q92797_447	PASFQAIYTPVESAGTEAQIKHLARLMATQMTAAGLGPGVE
Q92797_901	YHKRLPDVRFLIPVLNGLEKKEVIQALPKLIKLNPIVVKEV
Q92797_909	RFLIPVLNGLEKKEVIQALPKLIKLNPIVVKEVFNRLLGTQ
Q92797_912	IPVLNGLEKKEVIQALPKLIKLNPIVVKEVFNRLLGTQHGE
Q92797_919	EKKEVIQALPKLIKLNPIVVKEVFNRLLGTQHGEGNSALSP
Q94KE2_1540	HQLGPPGFTNVHAVSSAVQVKPVDQKQQAGEXXXXXXXXXX
Q94KE2_677	KRCATHCYIARNIQSHQQFTKMNPFWPAAAGSAPMYGTKAC
Q969V6_209	PPSLTNGTTIPTAKSTPTLIKQSQPKSASEKSQRSKKAKEL
Q969V6_214	NGTTIPTAKSTPTLIKQSQPKSASEKSQRSKKAKELKPKVK
Q969V6_532	PGGRAELEGRDKDQMLQEKDKQIEALTRMLRQKQQLVERLK
Q969V6_544	DQMLQEKDKQIEALTRMLRQKQQLVERLKLQLEQEKRAQQP
Q969V6_559	RMLRQKQQLVERLKLQLEQEKRAQQPAPAPAPLGTPVKQEN
Q96B97_552	KTSKTVTISQVSDNKASLPPKPGTMAAGGGGPAPLSSAAPS
Q96B97_57	WEGQINGRRGLFPDNFVREIKKEMKKDPLTNKAPEKPLHEV
Q96C00_293	PAPPALPPKIFYIKQEPFEPKEEISGSGTQPGGAKEETKVF
Q96EP1_126	VYRKNEPEHNVAYLYESLSEKQGMTQESFEANKENVFHGTK
Q96FV9_172	NTVFCGRIQLFLARLFPLSEKSGLNLQSQFNLENVTVFNTN
Q96FV9_19	XXMSPTPPLFSLPEARTRFTKSTREALNNKNIKPLLSTFSQ
Q96FV9_201	FNLENVTVFNTNEQESTLGQKHTEDREEGMDVEEGEMGDEE
Q96FV9_237	MGDEEAPTTCSIPIDYNLYRKFWSLQDYFRNPVQCYEKISW
Q96FV9_254	LYRKFWSLQDYFRNPVQCYEKISWKTFLKYSEEVLAVFKSY
Q96FV9_300	QASRKKMEELKTGGEHVYFAKFLTSEKLMDLQLSDSNFRRH
Q96FV9_531	TNQQFKSLPEYLENMVIKLAKELPPPSEEIKTGEDEDEEDN
Q96QD9_95	QQNSGFGKTSLNRRGRVMPGKRRPNGVITGLAARKTTGIRK
Q96T23_1338	ANQPARDSQPRVLPSEQESTKKPYRIESDEEEDFENVGKVG
Q96T23_1339	NQPARDSQPRVLPSEQESTKKPYRIESDEEEDFENVGKVGS
Q96T23_136	VECKLALLKYLCECQFDDNLKFKNIINEEDADTMRLQPIGR
Q96T23_1378	GSPLDYSLVDLPSTNGQSPGKAIENLIGKPTEKSQTPKDNS
Q96T23_138	CKLALLKYLCECQFDDNLKFKNIINEEDADTMRLQPIGRDK
Q99683_1350	FLAEDYTLLDVLYYVTRDDLKCLRLRGGMLCTLWKAIIDFR
Q99683_196	SMANNIILYCDTNSDSLQSLKEIICQKNTMCTGNYTFVPYM
Q99683_202	ILYCDTNSDSLQSLKEIICQKNTMCTGNYTFVPYMITPHNK
Q99683_792	PLKDNEQTIGFYTKQILEGLKYLHDNQIVHRDIKGDNVLIN
Q99683_853	NPCTETFTGTLQYMAPEIIDKGPRGYGKAADIWSLGCTIIE
Q99683_860	TGTLQYMAPEIIDKGPRGYGKAADIWSLGCTIIEMATGKPP
Q99814_685	APLGPPVSPPHVSTFKTRSAKGFGARGPDVLSPAMVALSNK
Q99856_126	REGPGEEHFEDMASDEDMKPKWEEEEMEEDLGEDEEEEEED
Q99856_320	GLNLPTSITSAAFTLRTQYMKYLYPYECEKRGLSNPNELQA
Q9BYV9_233	PTDTKESSEKDALTQYPRYKKYQLACTKNVYNASSHSTSGF
Q9BYV9_240	SEKDALTQYPRYKKYQLACTKNVYNASSHSTSGFASTFRED
Q9CAE3_177	YNYLVTHGYINFGIAQAIKDKFPAQSSKSSVIIVGAGLSGL
Q9FNB4_725	DSPMECSDGSQSRIINLTQVKSPVKALDASGSFVPPRMERD
Q9H2G2_587	EDTQSNDGKEVVEVGQKLINKPMVGPEAGGTKEVPIKEIVE
Q9H2G2_598	VEVGQKLINKPMVGPEAGGTKEVPIKEIVEMNEIEEGKNKE
Q9H2G2_603	KLINKPMVGPEAGGTKEVPIKEIVEMNEIEEGKNKEQAINS
Q9H2G2_617	TKEVPIKEIVEMNEIEEGKNKEQAINSSENIMDINEEPGTT
Q9H307_397	KQQDSQPEEVMDVLEMVENVKHVIADQEVMETNRVESVEPS
Q9H307_456	DKECKTLSPGKENVSALDMEKESEEKEEKESEPQPEPVAQP
Q9H307_555	VKLTEVPVEPVLTVHPESKSKTKTRSRSRGRARNKTSKSRS
Q9HAZ2_1029	KCHLCNRCFGQQTNLDRHLKKHEHENAPVSQHPGVLTNHLG
Q9HAZ2_103	DFELRESSIPGAGLGVWAKRKMEAGERLGPCVVVPRAAAKE
Q9HAZ2_702	LLTATGAAGDSIKAIASIAEKYFGPGFMGMQEKKLGSLPYH
Q9JIX5_1093	SKGAGHTNMPNLLNTMMELRKCCNHPYLINGAEEKILMEFR
Q9JLQ4_449	AFCNVGFFEEFPLQEPQAPLKFNPCFEMPMEGFGKVTLSKE
Q9JLQ4_463	EPQAPLKFNPCFEMPMEGFGKVTLSKELLVDAVNIAIPASL
Q9JLQ4_468	LKFNPCFEMPMEGFGKVTLSKELLVDAVNIAIPASLEISSL
Q9JLQ4_99	NHLQTHDPNKISYACDDCGKKYHTMLGYKRHLALHSASNGD
Q9LSE2_116	SQAFSLDPSQQNQFLSTNNNKGCLLNVPSSANPFDNAFEFG
Q9LSE2_215	PLELEGFGSPANGGFVGNRAKVLKPLEVLASSGAQPTLFQK
Q9LSE2_218	LEGFGSPANGGFVGNRAKVLKPLEVLASSGAQPTLFQKRAA
Q9LSE2_235	KVLKPLEVLASSGAQPTLFQKRAAMRQSSGSKMGNSESSGM
Q9LSE2_286	ETGIEVSGLNYESDEINESGKAAESVQIGGGGKGKKKGMPA
Q9LSE2_298	SDEINESGKAAESVQIGGGGKGKKKGMPAKNLMAERRRRKK
Q9N658_193	QLHPMTSLNVTPPPLSAVNLKSSSTPQQQRQRSQGNIIWSP
Q9N658_420	YQGENEEKRSGRNFQCKQCGKSFKRSSTLSTHLLIHSDTRP
Q9NS56_797	SRTASTGTDRVRNEKPGGKRKYKTRHLEGTNEVAQPSREFA
Q9NSC2_701	DSAQASETSKLQQLVENIDKKATDPNECIICHRVLSCQSAL
Q9NUW8_213	FGTLVSSAQFNYCFDVDWLVKQYPPEFRKKPILLVHGDKRE
Q9NYF8_421	DTEETEDYRQFRKSVLADQGKSFATASHRNTEEEGLKYKSK
Q9NYF8_437	ADQGKSFATASHRNTEEEGLKYKSKVSLKGNRESDGFREEK
Q9NYF8_445	TASHRNTEEEGLKYKSKVSLKGNRESDGFREEKNYKLKETG
Q9NYF8_457	KYKSKVSLKGNRESDGFREEKNYKLKETGYVVERPSTTKDK
Q9NYF8_460	SKVSLKGNRESDGFREEKNYKLKETGYVVERPSTTKDKHKE
Q9NYF8_462	VSLKGNRESDGFREEKNYKLKETGYVVERPSTTKDKHKEED
Q9NYF8_504	NSERITVKKETQSPEQVKSEKLKDLFDYSPPLHKNLDAREK
Q9NYF8_506	ERITVKKETQSPEQVKSEKLKDLFDYSPPLHKNLDAREKST
Q9NYF8_524	KLKDLFDYSPPLHKNLDAREKSTFREESPLRIKMIASDSHR
Q9NYF8_550	ESPLRIKMIASDSHRPEVKLKMAPVPLDDSNRPASLTKDRL
Q9NYF8_580	NRPASLTKDRLLASTLVHSVKKEQEFRSIFDHIKLPQASKS
Q9NYF8_581	RPASLTKDRLLASTLVHSVKKEQEFRSIFDHIKLPQASKST
Q9NYF8_593	STLVHSVKKEQEFRSIFDHIKLPQASKSTSESFIQHIVSLV
Q9NYF8_599	VKKEQEFRSIFDHIKLPQASKSTSESFIQHIVSLVHHVKEQ
Q9NYF8_617	ASKSTSESFIQHIVSLVHHVKEQYFKSAAMTLNERFTSYQK
Q9NYF8_647	TLNERFTSYQKATEEHSTRQKSPEIHRRIDISPSTLRKHTR
Q9NYF8_681	TLRKHTRLAGEERVFKEENQKGDKKLRCDSADLRHDIDRRR
Q9NYF8_684	KHTRLAGEERVFKEENQKGDKKLRCDSADLRHDIDRRRKER
Q9NYF8_685	HTRLAGEERVFKEENQKGDKKLRCDSADLRHDIDRRRKERS
Q9NYF8_702	GDKKLRCDSADLRHDIDRRRKERSKERGDSKGSRESSGSRK
Q9NYF8_778	PSSPSSREEKESKKEREEEFKTHHEMKEYSGFAGVSRPRGT
Q9NYF8_784	REEKESKKEREEEFKTHHEMKEYSGFAGVSRPRGTFFRIRG
Q9NYF8_828	ARGVFAGTNTGPNNSNTTFQKRPKEEEWDPEYTPKSKKYFL
Q9NYF8_912	YQGDGIVEDEEETMENNEEKKDRRKEEKEXXXXXXXXXXXX
Q9NZN4_120	VMHGDTEGTVPGNALVVDPDKPFRKLNPFGNTFLNRFMCAQ
Q9NZN4_124	DTEGTVPGNALVVDPDKPFRKLNPFGNTFLNRFMCAQLPNQ
Q9NZN4_162	PNQVLESISIIDTPGILSGAKQRVSRGYDFPAVLRWFAERV
Q9NZN4_220	FSEAIGALRGHEDKIRVVLNKADMVETQQLMRVYGALMWAL
Q9NZN4_242	DMVETQQLMRVYGALMWALGKVVGTPEVLRVYIGSFWSQPL
Q9NZN4_327	HAYIISYLKKEMPSVFGKENKKKQLILKLPVIFAKIQLEHH
Q9NZN4_539	GHGLPANLPRRLVPPSKRRHKGSAEXXXXXXXXXXXXXXXX
Q9NZN4_58	EHYRFGAFHSPALEDADFDGKPMVLVAGQYSTGKTSFIQYL
Q9NZN4_71	EDADFDGKPMVLVAGQYSTGKTSFIQYLLEQEVPGSRVGPE
Q9P1Z2_145	DELVTLEEADGGSDILLVVPKATVLQNQLDESQQERNDLMQ
Q9P1Z2_167	TVLQNQLDESQQERNDLMQLKLQLEGQVTELRSRVQELERA
Q9P1Z2_304	AELQVAQQENHHLNLDLKEAKSWQEEQSAQAQRLKDKVAQM
Q9P1Z2_320	LKEAKSWQEEQSAQAQRLKDKVAQMKDTLGQAQQRVAELEP
Q9SJN0_423	ELERKRKQQYFESLKSRAQPKLPKSNGRLRTLMRNPSCPLX
Q9SJN0_426	RKRKQQYFESLKSRAQPKLPKSNGRLRTLMRNPSCPLXXXX
Q9UBG0_505	WGPEGRWNDSPCNQSLPSICKKAGQLSQGAAEEDHGCRKGW
Q9UBG0_506	GPEGRWNDSPCNQSLPSICKKAGQLSQGAAEEDHGCRKGWT
Q9UBT2_557	DLGKDVEFEVVGDAPEKVGPKQAEDAAKSITNGSDDGAQPS
Q9UBW7_104	FTSSKNEELQGNDSKITPSSKELASQKGSVSETIVIDDEED
Q9UBW7_1071	VSGYQSHDDSSDNSECSFPFKYTYGVNAWKHWVKTRQLDED
Q9UBW7_1084	SECSFPFKYTYGVNAWKHWVKTRQLDEDLLVLDELKSSKSV
Q9UBW7_477	RMANGLIMNCCEQCGEYLPSKGAGNNVLVIDGQQKRFCCQS
Q9UBW7_48	LTNVGNSFSGPANPLVSRSNKFQNSSVEDDDDVVFIEPVQP
Q9UBW7_573	GPNGYMEPYCSTACMNSHKTKYAKSQSLGIICHFCKRNSLP
Q9UG01_1009	EAERLYVTVQEPDLAITMYKKHKLYDDMIRLVGKHHPDLLS
Q9UG01_1301	EQARHWEQAGEYSRAVDCYLKVRDSGNSGLAEKCWMKAAEL
Q9UG01_1324	DSGNSGLAEKCWMKAAELSIKFLPPQRNMEVVLAVGPQLIG
Q9UG01_18	XXXMHLKHLRTLLSPQDGAAKVTCMAWSQNNAKFAVCTVDR
Q9UG01_192	ADGTIVRYFFDDEGSGESQGKLVNHPCPPYALAWATNSIVA
Q9UG01_218	CPPYALAWATNSIVAAGCDRKIVAYGKEGHMLQTFDYSRDP
Q9UG01_295	WEEAKPKEITNLYTITALAWKRDGSRLCVGTLCGGVEQFDC
Q9UG01_519	KLLFRDRKLRLHLYDIESCSKTMILNFCSYMQWVPGSDVLV
Q9UG01_52	AVCTVDRVVLLYDEHGERRDKFSTKPADMKYGRKSYMVKGM
Q9UG01_56	VDRVVLLYDEHGERRDKFSTKPADMKYGRKSYMVKGMAFSP
Q9UG01_898	IEARCSIKAIEAALGARQWKKAIYILDLQDRNTASKYYPLV
Q9UG01_913	ARQWKKAIYILDLQDRNTASKYYPLVAQHYASLQEYEIAEE
Q9UG01_937	LVAQHYASLQEYEIAEELYTKGDRTKDAIDMYTQAGRWEQA
Q9UG01_94	FSPDSTKIAIGQTDNIIYVYKIGEDWGDKKVICNKFIQTSA
Q9UG01_942	YASLQEYEIAEELYTKGDRTKDAIDMYTQAGRWEQAHKLAM
Q9UG01_959	DRTKDAIDMYTQAGRWEQAHKLAMKCMRPEDVSVLYITQAQ
Q9UGC6_60	CLTVRNEERGENAGRPTHTTKMESIQVLEECQNPTAEEVLS
Q9UGC6_87	LEECQNPTAEEVLSWSQNFDKMMKAPAGRNLFREFLRTEYS
Q9UHF7_361	TYMGNSSTELEQHFLQTHPNKIKASLPSSEVAKPSEKNSNK
Q9UHF7_396	EKNSNKSIPALQSSDSGDLGKWQDKITVKAGDDTPVGYSVP
Q9UHF7_400	NKSIPALQSSDSGDLGKWQDKITVKAGDDTPVGYSVPIKPL
Q9UHF7_589	RGLCSPEKHLGEITYPFACRKSNCSHCALLLLHLSPGAAGS
Q9UHP3_250	ALLVGTKRKYVDPSRAVEILKDAFKSNDSQQQDVSEFTHKL
Q9UIS9_502	QEAQCSGLSWVVALPQVKQEKADTQDEWTPGTAVLTSPVLV
Q9UIS9_528	EWTPGTAVLTSPVLVPGCPSKAVDPGLPSVKQEPPDPEEDK
Q9UJX5_194	NILVLGGSSGFIELYAYGMFKIARVTGIAGTCLALCLSSDL
Q9UKF6_100	LPWFLQKTSFKGRTFMTHATKAIYRWLLSDYVKVSNISADD
Q9UKL3_1749	LQADTVGAFIDLTQDASSEAKSEGNHPALAVEDLGCGVIQV
Q9UKL3_176	FDTVKTKDLKSRSPHLDDCSKTDHRAKSDVSKDVHHSTSLP
Q9UKL3_1775	PALAVEDLGCGVIQVDEDNCKEEKAQVANRPLKCIVEETYI
Q9UKL3_1778	AVEDLGCGVIQVDEDNCKEEKAQVANRPLKCIVEETYIDLT
Q9UKL3_1787	IQVDEDNCKEEKAQVANRPLKCIVEETYIDLTTESPSSCEV
Q9UKL3_1808	CIVEETYIDLTTESPSSCEVKKDELKSEPGSNCDNSELPGT
Q9UKL3_23	ADDDNGDGTSLFDVFSASPLKNNDEGSLDIYAGLDSAVSDS
Q9UKL3_248	SRSHYQVGEGSSNEDSRRGRKDIRHSQFNRGTERVRKDLST
Q9UKL3_264	RRGRKDIRHSQFNRGTERVRKDLSTGCGDGEPRILEASQRL
Q9UKL3_290	CGDGEPRILEASQRLQGHPEKYGKGEPKTESKSSKFKSNSD
Q9UKL3_293	GEPRILEASQRLQGHPEKYGKGEPKTESKSSKFKSNSDSDY
Q9UKL3_297	ILEASQRLQGHPEKYGKGEPKTESKSSKFKSNSDSDYKGER
Q9UKL3_749	LDTKRNDNSDYCGISEGMEMKVALSTTVSETTESILQPSIE
Q9UKL3_785	QPSIEEADILPIMLSEDNNPKFEPSVIVTPLVESKSCHLEP
Q9UKL3_799	SEDNNPKFEPSVIVTPLVESKSCHLEPCLPKETLDSSLQQT
Q9UKL3_809	SVIVTPLVESKSCHLEPCLPKETLDSSLQQTELMDHRMATG
Q9UKV3_421	LVALPEQTASEEETPPPLLTKEASSPPPHPQLHSEEEIEPM
Q9UKV3_44	EYGSGRGHLGTFEGRWRKLPKMPEAVGTDPSTSRKMAELEE
Q9UKV3_487	SQHTVQLVGGLSPLSSPSDTKAESPAEKVPEESVLPLVQKS
Q9UKV3_494	VGGLSPLSSPSDTKAESPAEKVPEESVLPLVQKSTLADYSA
Q9ULJ3_547	SDLNKDEFGELEGTRPNKKFKCKHCLKIFRSTAGLHRHVNM
Q9ULU4_1033	LEKQQAVDETKKKQWCANCKKEAIFYCCWNTSYCDYPCQQA
Q9ULU4_205	YAEYIFHPMDLCTLEKNAKKKMYGCTEAFLADAKWILHNCI
Q9ULU4_21	MDISTRSKDPGSAERTAQKRKFPSPPHSSNGHSPQDTSTSP
Q9ULU4_950	TSKMMDAIKGTMTEIYNDLSKNTTGSTIAEIRRLRIEIEKL
Q9UPG8_16	XXXXXMTTFFTSVPPWIQDAKQEEEVGWKLVPRPRGREAES
Q9UPG8_24	FFTSVPPWIQDAKQEEEVGWKLVPRPRGREAESQVKCQCEI
Q9VEZ5_664	NEGEARHLPKSIDHMHYLYFKTKESIPVLLQQFCDIKKEIF
Q9VEZ5_666	GEARHLPKSIDHMHYLYFKTKESIPVLLQQFCDIKKEIFQI
Q9Y230_269	VINSRTQGFLALFSGDTGEIKSEVREQINAKVAEWREEGKA
Q9Y230_279	ALFSGDTGEIKSEVREQINAKVAEWREEGKAEIIPGVLFID
Q9Y265_268	ARPQGGQDILSMMGQLMKPKKTEITDKLRGEINKVVNKYID
Q9Y265_274	QDILSMMGQLMKPKKTEITDKLRGEINKVVNKYIDQGIAEL
Q9Y265_281	GQLMKPKKTEITDKLRGEINKVVNKYIDQGIAELVPGVLFV
Q9Y265_59	LVGQENAREACGVIVELIKSKKMAGRAVLLAGPPGTGKTAL
Q9Y2K1_340	AERKRIIIKMEPEDIPTDELKDFNIIKVTDKDCNESTDNDE
Q9Y2K1_381	LEDEPEEPFYRYYVEEDVSIKKSGRKTLKPRMSVSADERGG
Q9Y2K1_487	AQRCGEPQDLTMNGLGNTEEKMDLEENPDEQSEIRDMFVEM
Q9Y2X3_418	LEDRGIRKISGTGKALAKTEKYEHKSEVKTYDPSGDSTLPT
Q9Y2X3_426	ISGTGKALAKTEKYEHKSEVKTYDPSGDSTLPTCSKKRKIE
Q9Y4E5_700	EAFLSHYEEHHSIDYVFVSEKTETSIKTEDDFPVIETSNQL
Q9Y6Q9_1168	FPLQGMHPRANIMRPRTNTPKQLRMQLQQRLQGQQFLNQSR
Q9Y6Q9_1363	SQNPMMQHPQAASIYQSSEMKGWPSGNLARNSSFSQQQFAH
Q9Y6Q9_148	VNRDGNIVFVSENVTQYLQYKQEDLVNTSVYNILHEEDRKD
Q9Y6Q9_167	YKQEDLVNTSVYNILHEEDRKDFLKNLPKSTVNGVSWTNET
Q9ZQ70_310	LDGQVTEIIYKGQHNHELPQKRGNNNGSCKSSDIANQFQTS
