# Supplementary material for: An application of topological data analysis in predicting sumoylation sites
Source: PeerJ. 2023 Oct 12;11:e16204. doi: 10.7717/peerj.16204 (PMC10576966; doi:10.7717/peerj.16204)
Supplement: Supplemental Information 11 [file peerj-11-16204-s011.xlsx]

## Sheet: Sheet1
ue_pos	seq
A0AUZ9_422	IHRQIRASKGIVVLEECQLPKDILKKQMQFADQAASLNILG
A0AUZ9_475	PEQDFEMSPSSPTLLLRNIEKQSAQLTEIINSLIAPLNLSP
A2AJT9_381	DLRSSNDKWKEKIKKEGDCRKESNSSSNQLDKSQKLPDVKP
A2AJT9_409	QLDKSQKLPDVKPSPINLRKKSLTVKVDVKKTVDTFRVASS
A2AJT9_534	LNSDPEIHRRIDMSLAELQSKQAVIYESEQTLIKIIDPNDL
A6NFI3_118	LGTQERLSRGGDAKSPVLQEKGLQASRAPATPRDEDLEEEE
A6NHR9_1441	GNRPPANAETFSCNKIKDNDKEDGCFYFRDKVIPNKVGTYC
A6NHR9_1451	FSCNKIKDNDKEDGCFYFRDKVIPNKVGTYCIQFGFMMDKT
A6NHR9_1673	EMKCQVEEARLKEAQLRNELKIHNIDIPTTQQVPHIEALLK
A6NHR9_168	LIDNSLSATSRNIGVRRIQIKLLFDETQGKPAVAVIDNGRG
A6NHR9_496	WNGRLIPYTSVEDFDWCTPPKKRGLAPIECYNRISGALFTN
A6NHR9_619	YAAIEWDGKIYKAGQLVKTIKTLPLFYGSIVRFFLYGDHDG
A6NHR9_668	VQIAMEPQALYDEVRTVPIAKLDRTVAEKAVKKYVEDEMAR
A6NHR9_679	DEVRTVPIAKLDRTVAEKAVKKYVEDEMARLPDRLSVTWPE
A6NHR9_680	EVRTVPIAKLDRTVAEKAVKKYVEDEMARLPDRLSVTWPEG
A6NHR9_825	AGRPLPSKAIKFSVKEGKPEKFSFGLLDLPFRVGVPFNIPL
A6NHR9_891	SLHYEEITKGPNCVIRGVTAKGPVNSCQGKNYNLKVTLPGL
A6NHR9_900	GPNCVIRGVTAKGPVNSCQGKNYNLKVTLPGLKEDSQILKI
A7XYQ1_788	LESVKENNCASNCHLDGEAAKKLMGEEALAGGDKSDPNLNN
A7XYQ1_789	ESVKENNCASNCHLDGEAAKKLMGEEALAGGDKSDPNLNNP
A7XYQ1_837	ALRMLPKTGCVIQPVPKPAEKAAMAPCIISSPMLSAGPEDL
A8MW92_334	PKPQSQKKNEADISSSANTQKPALLSSTLSSGKARSKKCKH
A8MW92_346	ISSSANTQKPALLSSTLSSGKARSKKCKHESGDSSGCIKPP
A8MW92_35	IGARLEALDYLQKWYPSRIEKIDYEEGKMLVHFERWSHRYD
A8MW92_350	ANTQKPALLSSTLSSGKARSKKCKHESGDSSGCIKPPKSPL
A8MW92_351	NTQKPALLSSTLSSGKARSKKCKHESGDSSGCIKPPKSPLS
A8MW92_353	QKPALLSSTLSSGKARSKKCKHESGDSSGCIKPPKSPLSPE
A8MW92_364	SGKARSKKCKHESGDSSGCIKPPKSPLSPELIQVEDLTLVS
A8MW92_367	ARSKKCKHESGDSSGCIKPPKSPLSPELIQVEDLTLVSQLS
E9PAV3_1020	PATPSPKGAPTPPAVTPPSPKGSPAATPFPKGASTPPAATP
E9PAV3_1414	AIPSPKGDPTSPAVIPLSPKKAPATPVTREGAATPSKGDLT
E9PAV3_1708	PAPESTPIITAPTRKGPQTKKSSATSPPICPDPSAKNGSKG
E9PAV3_1759	LPVQKDSSKTAKGKDASHSPKGPLAPPESKASTPLTAAAFE
E9PAV3_1886	KSAGIPVPTPSAKQPVTKNNKGSGTESDSDESVPELEEQDS
E9PAV3_190	GSVITLSAPIAPSEPKTNLNKVPSEVVPNPKGTPSPPCIVS
E9PAV3_1929	ATTQQAQLAAAAEIDEEPVSKAKQSRSEKKARKAMSKLGLR
E9PAV3_1937	AAAAEIDEEPVSKAKQSRSEKKARKAMSKLGLRQVTGVTRV
E9PAV3_1938	AAAEIDEEPVSKAKQSRSEKKARKAMSKLGLRQVTGVTRVT
E9PAV3_1941	EIDEEPVSKAKQSRSEKKARKAMSKLGLRQVTGVTRVTIRK
E9PAV3_1976	RVTIRKSKNILFVITKPDVYKSPASDTYIVFGEAKIEDLSQ
E9PAV3_555	VPASLEGAPFSPAQAGLTTKKDPTVLPLVQAAPKNSPSFQS
E9PAV3_568	QAGLTTKKDPTVLPLVQAAPKNSPSFQSTSSSPEIPLSPEA
E9PAV3_593	FQSTSSSPEIPLSPEATLAKKSLGEPLPIGKPASSMTSPLG
E9PAV3_603	PLSPEATLAKKSLGEPLPIGKPASSMTSPLGVNSSASVIKT
E9PAV3_686	TSTYTTTASPFLEGTVSLAPKNHPVKEGTLTTLPLVPTASE
E9PAV3_691	TTASPFLEGTVSLAPKNHPVKEGTLTTLPLVPTASENCPVA
E9PAV3_749	EIPKSVPSPSLPPAGTPPGTKKVDGISHTSALAPVASSPKE
E9PAV3_806	TLTYLADSPSPLGVSVSPQTKRPPTKKGSAGPDTPIGNLSS
E9PAV3_811	ADSPSPLGVSVSPQTKRPPTKKGSAGPDTPIGNLSSPVSPV
O00231_118	DMEAATGQEVELCLECIEWAKSEKRTFLRQALEARLVSLYF
O00232_223	QIISKKINTKFFQEENTEKLKLKYYNLMIQLDQHEGSYLSI
O00267_650	VENGGMFVCKTRHLVLAGGSKPRDVTNFTVGGFAPMSPRIS
O00267_718	RGRRDNELIGQTVRISQGPYKGYIGVVKDATESTARVELHS
O00287_69	MQPCAGQDEAAAPGGSVGAGKPVRYLCEGAGDGEEEAGEDE
O00311_515	HKASCLVQTPPGQYSGNSFKKGDSNSCEHCFDEYNTNLEGW
O00425_280	ILEIMHKEAQDIKFTEEIPLKILAHNNFVGRLIGKEGRNLK
O00425_346	TITVKGNVETCAKAEEEIMKKIRESYENDIASMNLQAHLIP
O00425_465	EAPDAKVRMVIITGPPEAQFKAQGRIYGKIKEENFVSPKEE
O00541_555	LAIMMMKKREKYLYQKIMFGKRRKIREANKLAEKRKAHDEA
O00541_94	LHEPIVNKFREYKVFVRKLRKAYGKSEWNTVERLKDNKPNY
O00566_322	EELSISETDEDDDLQENEDNKQHKESLKRVTFALPDDAETE
O00566_329	TDEDDDLQENEDNKQHKESLKRVTFALPDDAETEDTGVLNV
O00566_351	VTFALPDDAETEDTGVLNVKKNSDEVKSSFEKRQEKMNEKI
O00566_366	VLNVKKNSDEVKSSFEKRQEKMNEKIASLEKELLEKKPWQL
O00566_559	APVSVSDAALLAPEEIKEKNKAGDIKTAAEKTATDKKRERR
O00566_575	KEKNKAGDIKTAAEKTATDKKRERRKKKYQKRMKIKEKEKR
O00566_582	DIKTAAEKTATDKKRERRKKKYQKRMKIKEKEKRRKLLEKS
O00566_585	TAAEKTATDKKRERRKKKYQKRMKIKEKEKRRKLLEKSSVD
O00566_588	EKTATDKKRERRKKKYQKRMKIKEKEKRRKLLEKSSVDQAG
O00566_597	ERRKKKYQKRMKIKEKEKRRKLLEKSSVDQAGKYSKTVASE
O00567_449	EEAAAEITRKLEKQEKKRLKKEKKRLAALALASSENSSSTP
O00567_451	AAAEITRKLEKQEKKRLKKEKKRLAALALASSENSSSTPEE
O00567_481	SSENSSSTPEECEEMSEKPKKKKKQKPQEVPQENGMEDPSI
O00567_483	ENSSSTPEECEEMSEKPKKKKKQKPQEVPQENGMEDPSISF
O00567_484	NSSSTPEECEEMSEKPKKKKKQKPQEVPQENGMEDPSISFS
O00567_507	PQEVPQENGMEDPSISFSKPKKKKSFSKEELMSSDLEETAG
O00567_509	EVPQENGMEDPSISFSKPKKKKSFSKEELMSSDLEETAGST
O00567_558	TPKEETVNDPEEAGHRSGSKKKRKFSKEEPVSSGPEEAVGK
O00567_561	EETVNDPEEAGHRSGSKKKRKFSKEEPVSSGPEEAVGKSSS
O00567_578	KKRKFSKEEPVSSGPEEAVGKSSSKKKKKFHKASQEDXXXX
O14503_102	HLKLTTLGHLEKAVVLELTLKHVKALTNLIDQQQQKIIALQ
O14503_190	QLVTHLHRVVSELLQGGTSRKPSDPAPKVMDFKEKPSSPAK
O14503_251	SGEQSGSDTDTDSGYGGESEKGDLRSEQPCFKSDHGRRFTM
O14639_609	REEDDEELLRRRQLQEEQLMKLNSGLGQLILKEEMEKESRE
O14639_625	EQLMKLNSGLGQLILKEEMEKESRERSSLLASRYDSPINSA
O14776_1055	KLIQESDQHLKDVEKILQNDKRYLVLDCVPEERRKLIVAYV
O14776_1069	KILQNDKRYLVLDCVPEERRKLIVAYVDDLDRRGPPPPPTA
O14776_141	PVTAPGTPALPPTEEIWVENKTPDGKVYYYNARTRESAWTK
O14776_146	GTPALPPTEEIWVENKTPDGKVYYYNARTRESAWTKPDGVK
O14776_466	YYYNNRTLESTWEKPQELKEKEKLEEKIKEPIKEPSEEPLP
O14776_468	YNNRTLESTWEKPQELKEKEKLEEKIKEPIKEPSEEPLPME
O14776_472	TLESTWEKPQELKEKEKLEEKIKEPIKEPSEEPLPMETEEE
O14776_756	MEEAKFNPRATFSEFAAKHAKDSRFKAIEKMKDREALFNEF
O14776_782	AIEKMKDREALFNEFVAAARKKEKEDSKTRGEKIKSDFFEL
O14776_785	KMKDREALFNEFVAAARKKEKEDSKTRGEKIKSDFFELLSN
O14776_855	MREDLFKQYIEKIAKNLDSEKEKELERQARIEASLRERERE
O14924_1051	KRTLFRLDLVPINRSVGLKAKPTKPVTEVLRPVVARYGLDL
O14924_117	EGVGRFESCSSDEEGGLYEGKGWLKPKLDSKALGINRAERV
O14924_127	SDEEGGLYEGKGWLKPKLDSKALGINRAERVVEEMQSGGIF
O14924_434	QNNSTSSNSDSGIGNFHQEEKSNRVLVVDLGGSSSRHGPGG
O14924_623	SRKAFGMQSIFGPHRNVRKTKEDKKGSKFGRGTGLTQPSQR
O14924_82	DQILAVNEINVKKASHEDVVKLIGKCSGVLHMVIAEGVGRF
O14924_824	KEQQLQIFNLMKFDSYTRFLKSPLYQECILAEVEGRALPDS
O14924_854	AEVEGRALPDSQQVPSSPASKHSLGSDHSSVSTPKKLSGKS
O14924_86	AVNEINVKKASHEDVVKLIGKCSGVLHMVIAEGVGRFESCS
O14924_868	PSSPASKHSLGSDHSSVSTPKKLSGKSKSGRSLNEELGDED
O14965_141	EESKKRQWALEDFEIGRPLGKGKFGNVYLAREKQSKFILAL
O15014_1010	YHTHLLSTNTAYRQQYEEQQKRQSLEQQQRGVDKKAEMGLK
O15014_1030	KRQSLEQQQRGVDKKAEMGLKEREAALKEEWKQKPSIPPTL
O15014_1310	CKSSSESKALDILQQHASHYKSKSPTISDKTSQERDRGGCG
O15014_1319	LDILQQHASHYKSKSPTISDKTSQERDRGGCGVVGGGGSCS
O15014_141	VQGRSGDGANAGGLVAAIAPKGSEKAAKASRSVAGSKKEKE
O15014_145	SGDGANAGGLVAAIAPKGSEKAAKASRSVAGSKKEKENSSS
O15014_148	GANAGGLVAAIAPKGSEKAAKASRSVAGSKKEKENSSSKSK
O15014_246	LGTKPEPEEGENECRLLKKVKSEKMESPVSTPAVLPIHLLV
O15014_336	GIVWQETEDGMLVVNVTWRNKTYVGTLLDCTRHDWAPPRFC
O15014_644	FDSLERKCMEKEKCKKPSSLKPEKIPSKSLKSARPIAPAIP
O15014_794	LNGSSDPHQSRLASIKAEADKIYSFTDNAPSPSIGGSSRLE
O15014_839	TQPLTPLHVVTQNGAEASSVKTNSPAYSDISDAGEDGEGKV
O15014_84	AVATLPDNIKFVTPVPGPQGKEGKSKSKRSKSGKDTSKPTP
O15014_872	GEDGEGKVDSVKSKDAEQLVKEGAKKTLFPPQPQSKDSPYY
O15014_89	PDNIKFVTPVPGPQGKEGKSKSKRSKSGKDTSKPTPGTSLF
O15014_91	NIKFVTPVPGPQGKEGKSKSKRSKSGKDTSKPTPGTSLFTP
O15015_1237	SLINHRQSHQTGHFGCQACSKGFSNLMSLKNHRRIHADPRR
O15042_1009	SRTPKRSRRSRSRSPKKSGKKSRSQSRSPHRSHKKSKKNKH
O15042_1023	PKKSGKKSRSQSRSPHRSHKKSKKNKHXXXXXXXXXXXXXX
O15042_159	GVVNAAKEEHETDEKRGKIYKPSSRFADQKNPPNQSSNERP
O15042_189	NPPNQSSNERPPSLLVIETKKPPLKKGEKEKKKSNLELFKE
O15042_197	ERPPSLLVIETKKPPLKKGEKEKKKSNLELFKEELKQIQEE
O15042_200	PSLLVIETKKPPLKKGEKEKKKSNLELFKEELKQIQEERDE
O15042_843	EEMTESKFSKYSEMSEEKRAKLREIELKVMKFQDELESGKR
O15042_850	FSKYSEMSEEKRAKLREIELKVMKFQDELESGKRPKKPGQS
O15042_853	YSEMSEEKRAKLREIELKVMKFQDELESGKRPKKPGQSFQE
O15042_887	PGQSFQEQVEHYRDKLLQREKEKELERERERDKKDKEKLES
O15042_899	RDKLLQREKEKELERERERDKKDKEKLESRSKDKKEKDECT
O15042_915	RERDKKDKEKLESRSKDKKEKDECTPTRKERKRRHSTSPSP
O15054_1175	FRESYLSPAQSVKPKINTEEKLPREKLNPPTPSIYLESKRD
O15060_458	GKLGLFSGAASPELKCAACGKVLAKDFHVVRGHILDHLNLK
O15164_1008	NAGIKLENYFEELLKNLYPEKRFPKPEFRNESEDNKFSDDS
O15164_198	ECVEWLCKTCIRAHQRVKFTKDHTVRQKEEVSPEAVGVTSQ
O15212_122	EQQRETLAQLQQEFQRAQAAKAGAPGKAXXXXXXXXXXXXX
O15212_21	MAELIQKKLQGEVEKYQQLQKDLSKSMSGRQKLEAQLTENN
O15265_271	IMTPSVKVEKIHPKMDGTLLKSAVGPTCPATVSSLVKPGLN
O15265_670	SSSPSTPSGLSSVPSSPMSRKPQKLKSSKSLRPKESSGNST
O15265_683	PSSPMSRKPQKLKSSKSLRPKESSGNSTNCQNASSSTSGGS
O15265_706	SGNSTNCQNASSSTSGGSGKKRKNSSPLLVHSSSSSSSSSS
O15265_858	KCSPSSSSINNSSSKPTKVAKVPAVNNVHMKHTGTIPGAQG
O15372_259	LGKNLQLLMDRVDEMSQDIVKYNTYMRNTSKQQQQKHQYQQ
O15372_274	SQDIVKYNTYMRNTSKQQQQKHQYQQRRQQENMQRQSRGEP
O15381_226	DSKDSSLLESDMKRKGKLKNKGSKRKKEDLQEVDGEIEAVL
O15381_492	ADLMALCREAAMCAVNRVLMKLQEQQKKNPEMEDLPSKGVQ
O15381_498	CREAAMCAVNRVLMKLQEQQKKNPEMEDLPSKGVQEERLGT
O15446_217	LEVDMALGSPEMDVRKKKKKKNQQLKEPEAAGPVGTEPTVE
O15446_254	PTVETLEPLGVLFPSTTKKRKKPKGKETFEPEDKTVKQEQI
O15446_255	TVETLEPLGVLFPSTTKKRKKPKGKETFEPEDKTVKQEQIN
O15446_385	APQQPEGAKPQAQAALAAPKKKTKKEKQQDATVEPETEVVG
O15446_386	PQQPEGAKPQAQAALAAPKKKTKKEKQQDATVEPETEVVGP
O15446_388	QPEGAKPQAQAALAAPKKKTKKEKQQDATVEPETEVVGPEL
O15446_422	EVVGPELPDDLEPQAAPTSTKKKKKKKERGHTVTEPIQPLE
O15446_423	VVGPELPDDLEPQAAPTSTKKKKKKKERGHTVTEPIQPLEP
O15446_426	PELPDDLEPQAAPTSTKKKKKKKERGHTVTEPIQPLEPELP
O15446_427	ELPDDLEPQAAPTSTKKKKKKKERGHTVTEPIQPLEPELPG
O15446_428	LPDDLEPQAAPTSTKKKKKKKERGHTVTEPIQPLEPELPGE
O15446_461	LEPELPGEGQPEARATPGSTKKRKKQSQESRMPETVPQEEM
O15446_464	ELPGEGQPEARATPGSTKKRKKQSQESRMPETVPQEEMPGP
O15525_101	KQKAELQQEVEKLASENASMKLELDALRSKYEALQTFARTV
O43143_166	FTDILVRHQSFVLVGETGSGKTTQIPQWCVEYMRSLPGPKR
O43143_18	XXXMSKRHRLDLGEDYPSGKKRAGTDGKDRDRDRDREDRSK
O43151_1058	QAYQNQVTNEEIAIDCRLGLKEGRPFAGVTACMDFCAHAHK
O43151_1095	HAHKDQHNLYNGCTVVCTLTKEDNRCVGKIPEDEQLHVLPL
O43151_1186	ARKAAAEKKKIQKEKLSTPEKIKQEALELAGITSDPGLSLK
O43151_120	KEVEIKAGEGAGPWGQGAAVKTGSELSPVDGPVPGQMDSGP
O43151_579	WWPPPSSPVPRLPDRPPKEKKKKLPTPAGGPVGTEKAAPGI
O43151_580	WPPPSSPVPRLPDRPPKEKKKKLPTPAGGPVGTEKAAPGIK
O43151_581	PPPSSPVPRLPDRPPKEKKKKLPTPAGGPVGTEKAAPGIKP
O43151_605	PAGGPVGTEKAAPGIKPSVRKPIQIKKSRPREAQPLFPPVR
O43151_610	VGTEKAAPGIKPSVRKPIQIKKSRPREAQPLFPPVRQIVLE
O43175_398	LLKEASKQADVNLVNAKLLVKEAGLNVTTSHSPAAPGEQGF
O43242_209	DDLMQKISTQNRRALDLVAAKCYYYHARVYEFLDKLDVVRS
O43290_170	PVTADVINPMALRQREELREKLAAAKEKRLLNQKLGKIKTL
O43290_186	ELREKLAAAKEKRLLNQKLGKIKTLGEDDPWLDDTAAWIER
O43290_309	LVNVNLVDKERAEKNVELRKKKPDYLPYAEDESVDDLAQQK
O43290_501	APPPGSPQVLEEDEAELELQKQLEKGRRLRQLQQLQQLRDS
O43290_505	GSPQVLEEDEAELELQKQLEKGRRLRQLQQLQQLRDSGEKV
O43290_54	EHKKHKHRSGGSGGSGGERRKRSRERGGERGSGRRGAEAEA
O43290_777	KKMSSSDTPLGTVALLQEKQKAQKTPYIVLSGSGKSMNANT
O43309_571	KPYQCDECGKAFRQRKKTSYKEILLKNHSEPQAGVNLLLSS
O43361_216	FNSSQGGKDFCHQHGLFEHQKTHNGERPYEFSECGELFRYN
O43390_415	NGKEIEGEEIEIVLAKPPDKKRKERQAARQASRSTAYEDYY
O43395_205	NTIQPSQAATFMNDAIEKARKAAELQARIQAQLALKPGLIG
O43395_220	IEKARKAAELQARIQAQLALKPGLIGNANMVGLANLHAMGI
O43395_282	GRTVDATGKEIELTHRMPTLKANIRAVKREQFKQQLKEKPS
O43395_300	TLKANIRAVKREQFKQQLKEKPSEDMESNTFFDPRVSIAPS
O43395_332	DPRVSIAPSQRQRRTFKFHDKGKFEKIAQRLRTKAQLEKLQ
O43395_337	IAPSQRQRRTFKFHDKGKFEKIAQRLRTKAQLEKLQAEISQ
O43395_506	GTEAVQDPTKVEAHVRAQMAKRQKAHEEANAARKLTAEQRK
O43395_509	AVQDPTKVEAHVRAQMAKRQKAHEEANAARKLTAEQRKVKK
O43395_519	HVRAQMAKRQKAHEEANAARKLTAEQRKVKKIKKLKEDISQ
O43395_526	KRQKAHEEANAARKLTAEQRKVKKIKKLKEDISQGVHISVY
O43395_529	KAHEEANAARKLTAEQRKVKKIKKLKEDISQGVHISVYRVR
O43395_531	HEEANAARKLTAEQRKVKKIKKLKEDISQGVHISVYRVRNL
O43395_534	ANAARKLTAEQRKVKKIKKLKEDISQGVHISVYRVRNLSNP
O43395_592	VVVLHKDVNVVVVEGGPKAQKKFKRLMLHRIKWDEQTSNTK
O43439_466	NKVKIQAMSEVQKAVAEAEQKAFEVIATERARMEQTIADVK
O43491_100	PWLKKQKSYTLVVAKDGGDKKEPTQAVVEEQVLDKEEPLPE
O43491_114	KDGGDKKEPTQAVVEEQVLDKEEPLPEEQRQAKGDAEEMAQ
O43491_221	ELKAEKASQKVTKKTKTVQCKVTLLDGTEYSCDLEKHAKGQ
O43491_239	QCKVTLLDGTEYSCDLEKHAKGQVLFDKVCEHLNLLEKDYF
O43491_246	DGTEYSCDLEKHAKGQVLFDKVCEHLNLLEKDYFGLLFQES
O43491_26	GSVSEVKKDSSQLGTDATKEKPKEVAENQQNQSSDPEEEKG
O43491_270	HLNLLEKDYFGLLFQESPEQKNWLDPAKEIKRQLRNLPWLF
O43491_295	PAKEIKRQLRNLPWLFTFNVKFYPPDPSQLTEDITRYFLCL
O43491_380	EFQFAPTQTKELEEKVAELHKTHRGLSPAQADSQFLENAKR
O43491_725	ITEEMNGKEISPGSGPGEIRKVEPVTQKDSTSLSSESSSSS
O43491_732	KEISPGSGPGEIRKVEPVTQKDSTSLSSESSSSSSESEEED
O43491_827	VITVETVIQENVGAQKIPGEKSVHEGALKQDMGEEAEEEPQ
O43491_83	KREKETSESRGISRFIPPWLKKQKSYTLVVAKDGGDKKEPT
O43491_84	REKETSESRGISRFIPPWLKKQKSYTLVVAKDGGDKKEPTQ
O43491_874	SHVDIDVLPQIICCSEPPVVKTEMVTISDASQRTEISTKEV
O43491_892	VVKTEMVTISDASQRTEISTKEVPIVQTETKTITYESPQID
O43491_902	DASQRTEISTKEVPIVQTETKTITYESPQIDGGAGGDSGTL
O43513_19	XXMGEPQQVSALPPPPMQYIKEYTDENIQEGLAPKPPPPIK
O43719_501	SQKESEEGNPVRGSEEDSPKKESKKKTLKNDCEENGLAKES
O43719_505	SEEGNPVRGSEEDSPKKESKKKTLKNDCEENGLAKESEDDL
O43719_506	EEGNPVRGSEEDSPKKESKKKTLKNDCEENGLAKESEDDLN
O43719_509	NPVRGSEEDSPKKESKKKTLKNDCEENGLAKESEDDLNKES
O43719_527	TLKNDCEENGLAKESEDDLNKESEEEVGPTKESEEDDSEKE
O43719_537	LAKESEDDLNKESEEEVGPTKESEEDDSEKESDEDCSEKQS
O43719_572	CSEKQSEDGSEREFEENGLEKDLDEEGSEKELHENVLDKEL
O43795_1002	AIEEKIIIAEVVNKINRANGKSTSRIFLLTNNNLLLADQKS
O43795_1116	EFLVQFRQDKVCVKFIQGNQKNGSVPTCKRKNNRLLEVAVP
O43795_380	LFSWLVNRINESIKAQTKVRKKVMGVLDIYGFEIFEDNSFE
O43818_311	ALSRECCVTAGGRDGTVRVWKIPEESQLVFYGHQGSIDCIH
O60216_335	ETKAKRKRKLIVDSVKELDSKTIRAQLSDYSDIVTTLDLAP
O60216_479	SRTNIDESAMPPPPPQGVKRKAGQIDPEPVMPPQQVEQMEI
O60216_531	NICQLIPELELLPEKEKEKEKEKEDDEEEEDEDASGGDQDQ
O60216_558	EEEDEDASGGDQDQEERRWNKRTQQMLHGLQRALAKTGAES
O60216_573	ERRWNKRTQQMLHGLQRALAKTGAESISLLELCRNTNRKQA
O60264_455	LNSAGKMDKMRLLNILMQLRKCCNHPYLFDGAEPGPPYTTD
O60264_600	DWNPQVDLQAMDRAHRIGQTKTVRVFRFITDNTVEERIVER
O60264_624	VFRFITDNTVEERIVERAEMKLRLDSIVIQQGRLVDQNLNK
O60264_683	ASKESEITDEDIDGILERGAKKTAEMNEKLSKMGESSLRNF
O60264_943	TKIGRYKAPFHQLRISYGTNKGKNYTEEEDRFLICMLHKLG
O60315_1082	KRFSHSGSYSQHMNHRYSYCKREAEEREAAEREAREKGHLE
O60315_16	XXXXXMKQPIMADGPRCKRRKQANPRRKNVVNYDNVVDTGS
O60315_43	KNVVNYDNVVDTGSETDEEDKLHIAEDDGIANPLDQETSPA
O60315_485	QIVDNTVSRQKMDCKAEEISKLKGYHMKDPCSQPEEQGVTS
O60315_487	VDNTVSRQKMDCKAEEISKLKGYHMKDPCSQPEEQGVTSPN
O60315_676	MSVLKAYYAMNMEPNSDELLKISIAVGLPQEFVKEWFEQRK
O60315_689	PNSDELLKISIAVGLPQEFVKEWFEQRKVYQYSNSRSPSLE
O60315_696	KISIAVGLPQEFVKEWFEQRKVYQYSNSRSPSLERSSKPLA
O60341_432	LEVVIQLQEKHVKDEQIEHWKKIVKTQEELKELLNKMVNLK
O60341_433	EVVIQLQEKHVKDEQIEHWKKIVKTQEELKELLNKMVNLKE
O60341_436	IQLQEKHVKDEQIEHWKKIVKTQEELKELLNKMVNLKEKIK
O60341_447	QIEHWKKIVKTQEELKELLNKMVNLKEKIKELHQQYKEASE
O60341_463	ELLNKMVNLKEKIKELHQQYKEASEVKPPRDITAEFLVKSK
O60341_585	LTVRNGYSCVPVALAEGLDIKLNTAVRQVRYTASGCEVIAV
O60563_527	KEKHKTHPSNHHHHHNHHSHKHSHSQLPVGTGNKRPGDPKH
O60583_121	EHVIKVAHACLHPLEPLLDTKCDAYLQQTQELVILETIMLQ
O60583_633	SSSSSRKRLHVNDASHNHHSKMSKSSKSSGSSSSSSSSVKQ
O60675_60	HLRGLTKEEVTRLKQRRRTLKNRGYAASCRIKRVTQKEELE
O60716_184	PVDASSVSNNYIQTLGRDFRKNGNGGPGPYVGQAGTATLPR
O60716_622	EAAPNVANNTGPHAASCFGAKKGKDEWFSRGKKPIEDPAND
O60716_79	TLTRRHQNGRFVGDADLERQKFSDLKLNGPQDHSHLLYSTI
O60716_794	TVISILNTINEVIAENLEAAKKLRETQGIEKLVLINKSGNR
O60716_795	VISILNTINEVIAENLEAAKKLRETQGIEKLVLINKSGNRS
O60716_810	LEAAKKLRETQGIEKLVLINKSGNRSEKEVRAAALVLQTIW
O60716_930	RGDHNRTLDRSGDLGDMEPLKGTTPLMQDEGQESLEEELDV
O60765_92	PWEVEKDGSGVSSLGSKSSHKTTKSTQTQDSSFQGLILKRS
O60784_106	HVLVASQDFVESVLVRTILPKNNPPTIVHDKVLNLIQSWAD
O60784_445	STDVGNDAEEPKGVTSEEFDKFLEERAKAADRLPNLSSPSA
O60832_339	GVLRYEDGIEVNQEIVVITTKGEAICMAIALMTTAVISTCD
O60832_448	VAEVVKAPQVVAEAAKTAKRKRESESESDETPPAAPQLIKK
O60832_470	ESESESDETPPAAPQLIKKEKKKSKKDKKAKAGLESGAEPG
O60832_471	SESESDETPPAAPQLIKKEKKKSKKDKKAKAGLESGAEPGD
O60832_475	SDETPPAAPQLIKKEKKKSKKDKKAKAGLESGAEPGDGDSD
O60832_477	ETPPAAPQLIKKEKKKSKKDKKAKAGLESGAEPGDGDSDTT
O60832_478	TPPAAPQLIKKEKKKSKKDKKAKAGLESGAEPGDGDSDTTK
O60832_480	PAAPQLIKKEKKKSKKDKKAKAGLESGAEPGDGDSDTTKKK
O60884_226	EGKKVIKEVKILEVHVDKGMKHGQRITFTGEADQAPGVEPG
O60884_25	ADTKLYDILGVPPGASENELKKAYRKLAKEYHPDKNPNAGD
O60884_26	DTKLYDILGVPPGASENELKKAYRKLAKEYHPDKNPNAGDK
O60884_287	LHMTYKIGLVEALCGFQFTFKHLDGRQIVVKYPPGKVIEPG
O60884_297	EALCGFQFTFKHLDGRQIVVKYPPGKVIEPGCVRVVRGEGM
O60885_1179	RPVIRPPEQNAPPPGAPDKDKQKQEPKTPVAPKKDLKIKNM
O60885_1181	VIRPPEQNAPPPGAPDKDKQKQEPKTPVAPKKDLKIKNMGS
O60885_283	PAPQPVQSHPPIIAATPQPVKTKKGVKRKADTTTPTTIDPI
O60885_291	HPPIIAATPQPVKTKKGVKRKADTTTPTTIDPIHEPPSLPP
O60885_314	TTTPTTIDPIHEPPSLPPEPKTTKLGQRRESSRPVKPPKKD
O60885_329	LPPEPKTTKLGQRRESSRPVKPPKKDVPDSQQHPAPEKSSK
O60885_346	RPVKPPKKDVPDSQQHPAPEKSSKVSEQLKCCSGILKEMFA
O60885_362	PAPEKSSKVSEQLKCCSGILKEMFAKKHAAYAWPFYKPVDV
O60885_367	SSKVSEQLKCCSGILKEMFAKKHAAYAWPFYKPVDVEALGL
O60885_368	SKVSEQLKCCSGILKEMFAKKHAAYAWPFYKPVDVEALGLH
O60885_431	EYRDAQEFGADVRLMFSNCYKYNPPDHEVVAMARKLQDVFE
O60885_445	MFSNCYKYNPPDHEVVAMARKLQDVFEMRFAKMPDEPEEPV
O60885_537	QLKAVHEQLAALSQPQQNKPKKKEKDKKEKKKEKHKRKEEV
O60885_541	VHEQLAALSQPQQNKPKKKEKDKKEKKKEKHKRKEEVEENK
O60885_543	EQLAALSQPQQNKPKKKEKDKKEKKKEKHKRKEEVEENKKS
O60885_548	LSQPQQNKPKKKEKDKKEKKKEKHKRKEEVEENKKSKAKEP
O60885_883	HNALPQQPSRPSNRAAALPPKPARPPAVSPALTQTPLLPQP
O60885_937	EPPAPPLTSMQMQLYLQQLQKVQPPTPLLPSVKVQSQPPPP
O60934_392	ADTWDLSERPKEIKVSKMEQKFRMLSQDAPTVKESCKTSSN
O60934_408	KMEQKFRMLSQDAPTVKESCKTSSNNNSMVSNTLAKMRIPN
O60934_441	LAKMRIPNYQLSPTKLPSINKSKDRASQQQQTNSIRNYFQP
O60934_502	RIETSCSLLEQTQPATPSLWKNKEQHLSENEPVDTNSDNNL
O60934_568	NKKREMDDVAIEDEVLEQLFKDTKPELEIDVKVQKQEEDVN
O60934_623	FSDEAVPESSKISQENEIGKKRELKEDSLWSAKEISNNDKL
O60934_653	SAKEISNNDKLQDDSEMLPKKLLLTEFRSLVIKNSTSRNPS
O75132_1074	PSKDSAAEENLWSLVAKVKKKDPREKLPEAMVLAYLEEEVL
O75132_1079	AAEENLWSLVAKVKKKDPREKLPEAMVLAYLEEEVLEHSCD
O75132_1108	YLEEEVLEHSCDPLTYWNLKKASWPGLSALAVRFLGCPPSI
O75150_288	AETKVLEMETTVEDLQWDIEKLRKREQKLNKHLAEALEQLN
O75150_298	TVEDLQWDIEKLRKREQKLNKHLAEALEQLNSGYYVSGSSS
O75150_371	AELEKLQAELQGAVRTNERLKVALRSLPEEVVRETGEYRML
O75150_439	TKNSHLRHIEHMESDELGLQKKLRTEVIQLEDTLAQVRKEY
O75150_457	LQKKLRTEVIQLEDTLAQVRKEYEMLRIEFEQNLAANEQAG
O75150_517	LKGDAQRYKRKLREVQAEIGKLRAQASGSAHSTPNLGHPED
O75150_58	LGGISSTEEMDLKVLQFKNKKLAERLEQRQACEDELRERIE
O75150_661	VEETKRKESELLKGLRAELKKAQESQKEMKLLLDMYKSAPK
O75150_670	ELLKGLRAELKKAQESQKEMKLLLDMYKSAPKEQRDKVQLM
O75150_677	AELKKAQESQKEMKLLLDMYKSAPKEQRDKVQLMAAERKAK
O75150_697	KSAPKEQRDKVQLMAAERKAKAEVDELRSRIRELEERDRRE
O75150_719	EVDELRSRIRELEERDRRESKKIADEDALRRIRQAEEQIEH
O75150_720	VDELRSRIRELEERDRRESKKIADEDALRRIRQAEEQIEHL
O75150_788	MQEQNGRLLQQLREKDDANFKLMSERIKANQIHKLLREEKD
O75150_860	GSLGGVEKELTLRSQALELNKRKAVEAAQLAEDLKVQLEHV
O75150_862	LGGVEKELTLRSQALELNKRKAVEAAQLAEDLKVQLEHVQT
O75150_921	ESFNLKRAQEDISRLRRKLEKQRKVEVYADADEILQEEIKE
O75151_389	ACWYMGKHLLEAFKGSHKSGKQLPPHLVQGAKILNGAFRSW
O75151_433	QALAEHEDELPEHFKPSQLIKDLAKEIRLSENASKAVRPEV
O75151_492	PPSPIEATPPQSLLEKVSKKKTPKTVKMPKPSKIPKPPKPP
O75151_532	PKPPRPPKTLKLKDGGKKKGKKSRESASPTIPNLDLLEAHT
O75151_533	KPPRPPKTLKLKDGGKKKGKKSRESASPTIPNLDLLEAHTK
O75151_558	ASPTIPNLDLLEAHTKEALTKMEPPKKGKATKSVLSVPNKD
O75151_564	NLDLLEAHTKEALTKMEPPKKGKATKSVLSVPNKDVVHMQN
O75151_70	CPNCEKTHGKSTLKKKRTWHKHGPGQAPDVKPVQNGSQLFI
O75151_871	KNSVDLDDYEEEQDHLDACFKDSDYVYPSLESDEDNPIFKS
O75151_890	FKDSDYVYPSLESDEDNPIFKSRSKKRKGSDDAPYSPTARV
O75151_894	DYVYPSLESDEDNPIFKSRSKKRKGSDDAPYSPTARVGPSV
O75151_895	YVYPSLESDEDNPIFKSRSKKRKGSDDAPYSPTARVGPSVP
O75151_897	YPSLESDEDNPIFKSRSKKRKGSDDAPYSPTARVGPSVPRQ
O75152_226	QGECLNFGIKTLEEIKSKKMKEKSKKQGEGSSGVSSLLLHP
O75152_230	LNFGIKTLEEIKSKKMKEKSKKQGEGSSGVSSLLLHPEPVP
O75152_332	EAPETNIDKTPKKAQVSKSLKERLGMSADPDNEDATDKVNK
O75152_372	KVGEIHVKTLEEILLERASQKRGELQTKLKTEGPSKTDDST
O75152_413	SGARSSSTIRIKTFSEVLAEKKHRQQEAERQKSKKDTTCIK
O75152_414	GARSSSTIRIKTFSEVLAEKKHRQQEAERQKSKKDTTCIKL
O75152_424	KTFSEVLAEKKHRQQEAERQKSKKDTTCIKLKIDSEIKKTV
O75152_433	KKHRQQEAERQKSKKDTTCIKLKIDSEIKKTVVLPPIVASR
O75152_521	ATPGARRLLRITKRTGMKEEKNLQEGNEVDSQSSIRTEAKE
O75152_565	ETTGVDITKIQVKRCETMREKHMQKQQEREKSVLTPLRGDV
O75152_610	TQVAEKPVLTAVPGITRHLTKRLPTKSSQKVEVETSGIGDS
O75152_646	GIGDSLLNVKCAAQTLEKRGKAKPKVNVKPSVVKVVSSPKL
O75152_648	GDSLLNVKCAAQTLEKRGKAKPKVNVKPSVVKVVSSPKLAP
O75179_1114	GHEELVQTLLERGASIEHRDKKGFTPLILAATAGHVGVVEI
O75179_1480	LEELDLEKLREESRRLALAAKREKRKEKRRKKKEEQRRKLE
O75179_1483	LDLEKLREESRRLALAAKREKRKEKRRKKKEEQRRKLEEIE
O75179_1485	LEKLREESRRLALAAKREKRKEKRRKKKEEQRRKLEEIEAK
O75179_1491	ESRRLALAAKREKRKEKRRKKKEEQRRKLEEIEAKNKENFE
O75179_1498	AAKREKRKEKRRKKKEEQRRKLEEIEAKNKENFELQAAQEK
O75179_1505	KEKRRKKKEEQRRKLEEIEAKNKENFELQAAQEKEKLKVED
O75179_1522	IEAKNKENFELQAAQEKEKLKVEDEPEVLTEPPSATTTTTI
O75179_1557	TTTTTIGISATWTTLAGSHGKRNNTITTTSSKRKNRKNKIT
O75179_1604	IFDDPLPISYSQPEKVNGESKSSSTSESGDSDNMRISSCSD
O75179_1729	SPKRGQKREEGWKEVVRRSKKVSVPSTVISRVIGRGGCNIN
O75179_1765	GCNINAIREFTGAHIDIDKQKDKTGDRIITIRGGTESTRQA
O75179_1767	NINAIREFTGAHIDIDKQKDKTGDRIITIRGGTESTRQATQ
O75179_1798	GTESTRQATQLINALIKDPDKEIDELIPKNRLKSSSANSKI
O75179_1806	TQLINALIKDPDKEIDELIPKNRLKSSSANSKIGSSAPTTT
O75179_186	TVDPETQARLEALLEAAGIGKLSTADGKAFADPEVLRRLTS
O75179_1867	QTATALTVPAISSASTHKTIKNPVNNVRPGFPVSLPLAYPP
O75179_193	ARLEALLEAAGIGKLSTADGKAFADPEVLRRLTSSVSCALD
O75179_252	QSDNRSLAEACSEGDVNAVRKLLIEGRSVNEHTEEGESLLC
O75179_652	TPLMKAARAGHVCTVQFLISKGANVNRTTANNDHTVLSLAC
O75179_75	VRVCDLLLKKKPPQQQHHKAKRNRTCRPPSSSESSSDSDNS
O75179_823	SPESIVEEAQGKLTELEQRIKEAIEKNAQLQSLELAHADQL
O75179_847	EKNAQLQSLELAHADQLTKEKIEELNKTREEQIQKKQKILE
O75179_871	LNKTREEQIQKKQKILEELQKVERELQLKTQQQLKKQYLEV
O75362_348	SSEKELGETNKGSCAGLSQEKEKCKHSHGEAPSVDADPKLP
O75362_352	ELGETNKGSCAGLSQEKEKCKHSHGEAPSVDADPKLPSSKE
O75362_371	CKHSHGEAPSVDADPKLPSSKEKPTHCSECGKAFRTYHQLV
O75362_373	HSHGEAPSVDADPKLPSSKEKPTHCSECGKAFRTYHQLVLH
O75367_137	KRGSKGKLEAIITPPPAKKAKSPSQKKPVSKKAGGKKGARK
O75367_196	EGTPADGFTVLSTKSLFLGQKLNLIHSEISNLAGFEVEAII
O75367_307	EELLEKTVKNCLALADDKKLKSIAFPSIGSGRNGFPKQTAA
O75376_144	AAVLPLVHPLPEGLRASADAKKDPAFGGKHEAPSSPISGQP
O75376_145	AVLPLVHPLPEGLRASADAKKDPAFGGKHEAPSSPISGQPC
O75376_2323	TSGETRREEGDPSPHSGGVCKPKLISKSNSRKSKSPIPGQG
O75376_2325	GETRREEGDPSPHSGGVCKPKLISKSNSRKSKSPIPGQGYL
O75376_2329	REEGDPSPHSGGVCKPKLISKSNSRKSKSPIPGQGYLGTER
O75376_2334	PSPHSGGVCKPKLISKSNSRKSKSPIPGQGYLGTERPSSVS
O75376_2336	PHSGGVCKPKLISKSNSRKSKSPIPGQGYLGTERPSSVSSV
O75376_245	PPPVEQKHRSIVQIIYDENRKKAEEAHKIFEGLGPKVELPL
O75376_451	YKDRQFMNVWTDHEKEIFKDKFIQHPKNFGLIASYLERKSV
O75376_457	MNVWTDHEKEIFKDKFIQHPKNFGLIASYLERKSVPDCVLY
O75376_469	KDKFIQHPKNFGLIASYLERKSVPDCVLYYYLTKKNENYKA
O75376_497	YYYLTKKNENYKALVRRNYGKRRGRNQQIARPSQEEKVEEK
O75376_538	EEDKAEKTEKKEEEKKDEEEKDEKEDSKENTKEKDKIDGTA
O75400_233	KELEDLEGYQNTIVAGSLITKSNLHAMIKAEESSKQEECTT
O75400_590	QNMDKEDALICFEEHIRALEKEEEEEKQKSLLRERRRQRKN
O75400_727	KRSTTLDAGNIKLAFNSLLEKAEAREREREKEEARKMKRKE
O75400_746	EKAEAREREREKEEARKMKRKESAFKSMLKQAAPPIELDAV
O75400_843	RKRSRSRSGSDSDDDDSHSKKKRQRSESRSASEHSSSAESE
O75400_878	SSAESERSYKKSKKHKKKSKKRRHKSDSPESDAEREKDKKE
O75400_897	KKRRHKSDSPESDAEREKDKKEKDRESEKDRTRQRSESKHK
O75400_899	RRHKSDSPESDAEREKDKKEKDRESEKDRTRQRSESKHKSP
O75400_905	SPESDAEREKDKKEKDRESEKDRTRQRSESKHKSPKKKTGK
O75475_189	TASVNLKVSPKRGRPAATEVKIPKPRGRPKMVKQPCPSESD
O75475_192	VNLKVSPKRGRPAATEVKIPKPRGRPKMVKQPCPSESDIIT
O75475_198	PKRGRPAATEVKIPKPRGRPKMVKQPCPSESDIITEEDKSK
O75475_218	KMVKQPCPSESDIITEEDKSKKKGQEEKQPKKQPKKDEEGQ
O75475_229	DIITEEDKSKKKGQEEKQPKKQPKKDEEGQKEEDKPRKEPD
O75475_233	EEDKSKKKGQEEKQPKKQPKKDEEGQKEEDKPRKEPDKKEG
O75475_260	EEDKPRKEPDKKEGKKEVESKRKNLAKTGVTSTSDSEEEGD
O75475_262	DKPRKEPDKKEGKKEVESKRKNLAKTGVTSTSDSEEEGDDQ
O75475_286	KTGVTSTSDSEEEGDDQEGEKKRKGGRNFQTAHRRNMLKGQ
O75475_289	VTSTSDSEEEGDDQEGEKKRKGGRNFQTAHRRNMLKGQHEK
O75475_309	KGGRNFQTAHRRNMLKGQHEKEAADRKRKQEEQMETEQQNK
O75475_360	VEKKRETSMDSRLQRIHAEIKNSLKIDNLDVNRCIEALDEL
O75475_392	RCIEALDELASLQVTMQQAQKHTEMITTLKKIRRFKVSQVI
O75475_402	SLQVTMQQAQKHTEMITTLKKIRRFKVSQVIMEKSTMLYNK
O75475_415	EMITTLKKIRRFKVSQVIMEKSTMLYNKFKNMFLVGEGDSV
O75475_422	KIRRFKVSQVIMEKSTMLYNKFKNMFLVGEGDSVITQVLNK
O75475_457	TQVLNKSLAEQRQHEEANKTKDQGKKGPNKKLEKEQTGSKT
O75475_461	NKSLAEQRQHEEANKTKDQGKKGPNKKLEKEQTGSKTLNGG
O75475_510	PQHNGESNEDSKDNHEASTKKKPSSEERETEISLKDSTLDN
O75475_511	QHNGESNEDSKDNHEASTKKKPSSEERETEISLKDSTLDNX
O75475_65	FGTHETAFLGPKDIFPYSENKEKYGKPNKRKGFNEGLWEID
O75475_67	THETAFLGPKDIFPYSENKEKYGKPNKRKGFNEGLWEIDNN
O75475_70	TAFLGPKDIFPYSENKEKYGKPNKRKGFNEGLWEIDNNPKV
O75475_73	LGPKDIFPYSENKEKYGKPNKRKGFNEGLWEIDNNPKVKFS
O75475_89	GKPNKRKGFNEGLWEIDNNPKVKFSSQQAATKQSNASSDVE
O75525_327	GLSEETYDSYGQEEWTNSRHKAPSARTAKGVYRDQPYGRYX
O75528_223	EDLLEEQKDGARAAAVADKKKGLMGPLTELDTKDVDALLKK
O75528_242	KKGLMGPLTELDTKDVDALLKKSEAQHEQPEDGCPFGALTQ
O75533_111	LNDIPQSTEQYDPFAEHRPPKIADREDEYKKHRRTMIISPE
O75533_141	KHRRTMIISPERLDPFADGGKTPDPKMNARTYMDVMREQHL
O75533_177	REQHLTKEEREIRQQLAEKAKAGELKVVNGAAASQPPSKRK
O75533_505	STLSPEEQKERKIMKLLLKIKNGTPPMRKAALRQITDKARE
O75533_729	IAALAEAATPYGIESFDSVLKPLWKGIRQHRGKGLAAFLKA
O75533_946	KPYLPQICGTVLWRLNNKSAKVRQQAADLISRTAVVMKTCQ
O75534_273	VIFEDISIEHFEGTVTKVIPKVPSKNQNDPLPGRIKVDFVI
O75534_277	DISIEHFEGTVTKVIPKVPSKNQNDPLPGRIKVDFVIPKEL
O75626_255	KNELCPKNVPKREYSVKEILKLDSNPSKGKDLYRSNISPLT
O75626_532	PTSGSPTAGTAATAEHVVQPKATSAAMAAPSSDEAMNLIKN
O75626_582	LPYPLKKQNGKIKYECNVCAKTFGQLSNLKVHLRVHSGERP
O75626_732	AAPAPGLPLEDLTRINEEIEKFDISDNADRLEDVEDDISVI
O75626_757	DNADRLEDVEDDISVISVVEKEILAVVRKEKEETGLKVSLQ
O75626_765	VEDDISVISVVEKEILAVVRKEKEETGLKVSLQRNMGNGLL
O75626_767	DDISVISVVEKEILAVVRKEKEETGLKVSLQRNMGNGLLSS
O75643_451	PDGSFRRQRKGYEEVHVPALKPKPFGSEEQLLPVEKLPKYA
O75694_1187	HHSSVQDAVSQLDSELMDITKLYGEFADPFKLAECKLAIIH
O75694_340	QNAIVSAAGNIARTIDRSVFKPIVQIAVIENSESLDCQLLA
O75694_407	LVHVRLPPGFSASSTVEKPSKVHRALYSKGILLMAASENED
O75694_415	GFSASSTVEKPSKVHRALYSKGILLMAASENEDNDILWCVN
O75717_744	QMEEQFWRSVIFHNHLDYLAKNGYEYEESTKNQATKEQQEL
O75717_754	IFHNHLDYLAKNGYEYEESTKNQATKEQQELLMKMLALSCK
O75717_805	ADLMTQNAVNLAIKYASRSRKLILAQKLSELAVEKAAELTA
O75822_133	QLADKLRLKKLQEESDLELAKETFGVNNAVYGIDAMNPSSR
O75822_161	AVYGIDAMNPSSRDDFTEFGKLLKDKITQYEKSLYYASFLE
O75822_164	GIDAMNPSSRDDFTEFGKLLKDKITQYEKSLYYASFLEVLV
O75822_166	DAMNPSSRDDFTEFGKLLKDKITQYEKSLYYASFLEVLVRD
O75822_172	SRDDFTEFGKLLKDKITQYEKSLYYASFLEVLVRDVCISLE
O75822_198	SFLEVLVRDVCISLEIDDLKKITNSLTVLCSEKQKQEKQSK
O75822_218	KITNSLTVLCSEKQKQEKQSKAKKKKKGVVPGGGLKATMKD
O75822_70	DNWDDDDDEKKEEAEVKPEVKISEKKKIAEKIKEKERQQKK
O75822_75	DDDEKKEEAEVKPEVKISEKKKIAEKIKEKERQQKKRQEEI
O75822_82	EAEVKPEVKISEKKKIAEKIKEKERQQKKRQEEIKKRLEEP
O75822_84	EVKPEVKISEKKKIAEKIKEKERQQKKRQEEIKKRLEEPEE
O75928_324	LLQRLKMKGIRNPDHSRALIKEKLTADPDSEIATTSLRVSL
O75928_465	ESSSVLSKPCSVTVASEASKKKVDVIDLTIESSSDEEEDPP
O75928_466	SSSVLSKPCSVTVASEASKKKVDVIDLTIESSSDEEEDPPA
O76021_100	VRLTLPHSIRSDSEDICLFTKDEPNSTPEKTEQFYRKLLNK
O76021_109	RSDSEDICLFTKDEPNSTPEKTEQFYRKLLNKHGIKTVSQI
O76021_332	TASVLSKDDVAPESGDTTVKKPESKKEQTPEHGKKKRGRGK
O76021_345	SGDTTVKKPESKKEQTPEHGKKKRGRGKAQVKATNESEDEI
O76021_373	AQVKATNESEDEIPQLVPIGKKTPANEKVEIQKHATGKKSP
O76021_385	IPQLVPIGKKTPANEKVEIQKHATGKKSPAKSPNPSTPRGK
O76021_391	IGKKTPANEKVEIQKHATGKKSPAKSPNPSTPRGKKRKALP
O76021_426	KRKALPASETPKAAESETPGKSPEKKPKIKEEAVKEKSPSL
O76021_442	ETPGKSPEKKPKIKEEAVKEKSPSLGKKDARQTPKKPEAKF
O76021_448	PEKKPKIKEEAVKEKSPSLGKKDARQTPKKPEAKFFTTPSK
O76021_449	EKKPKIKEEAVKEKSPSLGKKDARQTPKKPEAKFFTTPSKS
O76021_456	EEAVKEKSPSLGKKDARQTPKKPEAKFFTTPSKSVRKASHT
O76094_163	YDEERKTNLSAVVAAQSNWEKVVPENLGLQEGTHELCYNTA
O76094_32	PALWSEVNRYGQNGDFTRALKTVNKILQINKDDVTALHCKV
O76094_325	AIEFNKALLAMYTNQAEQCRKISASLQSQSPEHLLPVLIQA
O76094_352	SQSPEHLLPVLIQAAQLCREKQHTKAIELLQEFSDQHPENA
O76094_356	EHLLPVLIQAAQLCREKQHTKAIELLQEFSDQHPENAAEIK
O76094_36	SEVNRYGQNGDFTRALKTVNKILQINKDDVTALHCKVVCLI
O76094_459	HQPKSPAHLSLIREAANFKLKYGRKKEAISDLQQLWKQNPK
O76094_51	LKTVNKILQINKDDVTALHCKVVCLIQNGSFKEALNVINTH
O76094_515	DPEKAKALSKHLPSSDSMSLKVDVEALENSAGATYIRKKGG
O76094_533	SLKVDVEALENSAGATYIRKKGGKVTGDSQPKEQGQGDLKK
O76094_656	ASTSNIIPPRHQKPAGAPATKKKQQQKKKKGGKGGWXXXXX
O94826_470	YTGNNSSQIQAAMKGFEEVIKKFPRCAEGYALYAQALTDQQ
O94901_513	AVGEQLLPTVEHLQLELDQLKSELSSWRHVKTGCETVDAVQ
O94901_545	GCETVDAVQERVDVQVREMVKLLFSEDQQGGSLEQLLQRFS
O94901_637	ITEAQARAIVNSALKLYSQDKTGMVDFALESGGGSILSTRC
O94901_664	ALESGGGSILSTRCSETYETKTALMSLFGIPLWYFSQSPRV
O94901_725	LVVRLSMMIHPAAFTLEHIPKTLSPTGNISSAPKDFAVYGL
O94913_113	TKNLVATFICVFEKVDENTRKSLFKLRSTWDEIFPLKKLYA
O94913_1411	WIEFEEIADLEERAKSQFFEKVHEEVVLKTQEAAKEKEFQS
O94913_1425	KSQFFEKVHEEVVLKTQEAAKEKEFQSVPAGPAGAVESCEI
O94913_1464	EICQEQFEQYWDEEEEEWHLKNAIRVDGKIYHPSCYEDYQN
O94913_1496	PSCYEDYQNTSSFDCTPSPSKTPVENPLNIMLNIVKNELQE
O94913_213	DIQKNLTQEQLIRQQLLAKQKQLLELQQKKLELELEQAKAQ
O94913_221	EQLIRQQLLAKQKQLLELQQKKLELELEQAKAQLAVSLSVQ
O94913_222	QLIRQQLLAKQKQLLELQQKKLELELEQAKAQLAVSLSVQQ
O94913_278	VSQIPPMAVKAPHQVPVQSEKSRPGPSLQIQDLKGTNRDPR
O94913_309	DLKGTNRDPRLNRISQHSHGKDQSHRKEFLMNTLNQSDTKT
O94913_315	RDPRLNRISQHSHGKDQSHRKEFLMNTLNQSDTKTSKTIPS
O94913_331	QSHRKEFLMNTLNQSDTKTSKTIPSEKLNSSKQEKSKSGEK
O94913_337	FLMNTLNQSDTKTSKTIPSEKLNSSKQEKSKSGEKITKKEL
O94913_34	AREDACRDYQSSLEDLTFNSKPHINMLTILAEENLPFAKEI
O94913_342	LNQSDTKTSKTIPSEKLNSSKQEKSKSGEKITKKELDQLDS
O94913_345	SDTKTSKTIPSEKLNSSKQEKSKSGEKITKKELDQLDSKSK
O94913_347	TKTSKTIPSEKLNSSKQEKSKSGEKITKKELDQLDSKSKSK
O94913_351	KTIPSEKLNSSKQEKSKSGEKITKKELDQLDSKSKSKSKSP
O94913_365	KSKSGEKITKKELDQLDSKSKSKSKSPSPLKNKLSHTKDLK
O94913_369	GEKITKKELDQLDSKSKSKSKSPSPLKNKLSHTKDLKNQES
O94913_399	SHTKDLKNQESESMRLSDMNKRDPRLKKHLQDKTDGKDDDV
O94913_406	NQESESMRLSDMNKRDPRLKKHLQDKTDGKDDDVKEKRKTA
O94913_520	RRSPKRRQRSMSPTSTPKAGKIRQSGAKQSHMEEFTPPSRE
O94913_94	MYLMDSIVKNVGREYLTAFTKNLVATFICVFEKVDENTRKS
O94916_584	RPCSFEEAMKAMKTTGCNLDKVNIIPNALMTPLIPSSMIKS
O95073_27	SSNFTLSEKLDLLKLVKPYVKILEEHTNKHSVIVEKNRCWD
O95232_23	SAAQLLDELMGRDRNLAPDEKRSNVRWDHESVCKYYLCGFC
O95232_231	HLMGKQHMGYAKIKATVEELKEKLRKRTEEPDRDERLKKEK
O95232_249	ELKEKLRKRTEEPDRDERLKKEKQEREEREKEREREREERE
O95232_315	SRSRHSSRTSDRRCSRSRDHKRSRSRERRRSRSRDRRRSRS
O95232_377	DRKSYKHRSKSRDREQDRKSKEKEKRGSDDKKSSVKSGSRE
O95232_72	RSDLGPCEKIHDENLRKQYEKSSRFMKVGYERDFLRYLQSL
O95232_78	CEKIHDENLRKQYEKSSRFMKVGYERDFLRYLQSLLAEVER
O95239_1089	EWKPTKLVKVSRKNIQGCSCKGWCGNKQCGCRKQKSDCGVD
O95239_1204	APSPFDLPELKHVATEYQENKAPGKKKKRALASNTSFFSGC
O95239_1208	FDLPELKHVATEYQENKAPGKKKKRALASNTSFFSGCSPIE
O95239_1210	LPELKHVATEYQENKAPGKKKKRALASNTSFFSGCSPIEEE
O95239_128	NEPTVGVIPRVIQLLFKEIDKKSDFEFTLKVSYLEIYNEEI
O95239_137	RVIQLLFKEIDKKSDFEFTLKVSYLEIYNEEILDLLCPSRE
O95239_158	VSYLEIYNEEILDLLCPSREKAQINIREDPKEGIKIVGLTE
O95239_179	AQINIREDPKEGIKIVGLTEKTVLVALDTVSCLEQGNNSRT
O95239_225	MNSQSSRSHAIFTISLEQRKKSDKNSSFRSKLHLVDLAGSE
O95239_228	QSSRSHAIFTISLEQRKKSDKNSSFRSKLHLVDLAGSERQK
O95239_248	KNSSFRSKLHLVDLAGSERQKKTKAEGDRLKEGININRGLL
O95239_249	NSSFRSKLHLVDLAGSERQKKTKAEGDRLKEGININRGLLC
O95239_292	NVISALGDDKKGGFVPYRDSKLTRLLQDSLGGNSHTLMIAC
O95239_335	PADSNLEETLNTLRYADRARKIKNKPIVNIDPQTAELNHLK
O95239_433	TAQMLERIILTEQANEKMNAKLEELRQHAACKLDLQKLVET
O95239_444	EQANEKMNAKLEELRQHAACKLDLQKLVETLEDQELKENVE
O95239_593	KEKEELVLELQTAKKDANQAKLSERRRKRLQELEGQIADLK
O95239_600	LELQTAKKDANQAKLSERRRKRLQELEGQIADLKKKLNEQS
O95239_614	LSERRRKRLQELEGQIADLKKKLNEQSKLLKLKESTERTVS
O95239_615	SERRRKRLQELEGQIADLKKKLNEQSKLLKLKESTERTVSK
O95239_635	KLNEQSKLLKLKESTERTVSKLNQEIRMMKNQRVQLMRQMK
O95239_655	KLNQEIRMMKNQRVQLMRQMKEDAEKFRQWKQKKDKEVIQL
O95239_665	NQRVQLMRQMKEDAEKFRQWKQKKDKEVIQLKERDRKRQYE
O95239_703	QYELLKLERNFQKQSNVLRRKTEEAAAANKRLKDALQKQRE
O95239_868	DRPKQRWENIATILEAKCALKYLIGELVSSKIQVSKLESSL
O95391_192	GYNPEEHMKIVEEYAKVDLAKRTLKAQKLQEELASGKLVEQ
O95391_196	EEHMKIVEEYAKVDLAKRTLKAQKLQEELASGKLVEQANSP
O95391_217	AQKLQEELASGKLVEQANSPKHQWGEEEPNSQMEKDHNSED
O95391_242	EEEPNSQMEKDHNSEDEDEDKYADDIDMPGQNFDSKRRITV
O95391_27	DAVNAAPLSGSKEMSLEEPKKMTREDWRKKKELEEQRKLGN
O95391_493	EITGEESVKKPQTLMELHQEKLKEEKKKKKKKKKKHRKSSS
O95391_500	VKKPQTLMELHQEKLKEEKKKKKKKKKKHRKSSSDSDDEEK
O95391_502	KPQTLMELHQEKLKEEKKKKKKKKKKHRKSSSDSDDEEKKH
O95391_503	PQTLMELHQEKLKEEKKKKKKKKKKHRKSSSDSDDEEKKHE
O95391_526	KKHRKSSSDSDDEEKKHEKLKKALNAEEARLLHVKETMQID
O95391_527	KHRKSSSDSDDEEKKHEKLKKALNAEEARLLHVKETMQIDE
O95433_273	VDGNVSGEFTDLVPEKHIVMKWRFKSWPEGHFATITLTFID
O95478_140	PLPKVRAQGETEVLKVIRTGKRKKKAWKRMVTKVCFVGDGF
O95478_163	KKAWKRMVTKVCFVGDGFTRKPPKYERFIRPMGLRFKKAHV
O95478_179	GFTRKPPKYERFIRPMGLRFKKAHVTHPELKATFCLPILGV
O95478_180	FTRKPPKYERFIRPMGLRFKKAHVTHPELKATFCLPILGVK
O95478_63	IGLKAKLYHKQRHAEKIQMKKTIKMHEKRNTKQKNDEKTPQ
O95619_202	KLEAAKKKTSFEIAELKERLKASRETINCLKNEIRKLEEDD
O95619_64	THQWTVYVKPYRNEDMSAYVKKIQFKLHESYGNPLRVVTKP
O95619_69	VYVKPYRNEDMSAYVKKIQFKLHESYGNPLRVVTKPPYEIT
O95619_83	VKKIQFKLHESYGNPLRVVTKPPYEITETGWGEFEIIIKIF
O95625_551	RKAVPKSAVQQVAQKLVQRGKKMKQPKRDAKENTEEASHKC
O95625_552	KAVPKSAVQQVAQKLVQRGKKMKQPKRDAKENTEEASHKCG
O95625_554	VPKSAVQQVAQKLVQRGKKMKQPKRDAKENTEEASHKCGEC
O95677_146	TSSGYSPRSAHQYSPQLYPSKPYPHILSTPAAQTMSAYAGQ
O95696_425	EMKNGVCRKESSVKTVRSTSKVRKKAKKAKKALAEPCAVLP
O95696_544	YWQRLRHDLERARLLIELLRKREKLKREQVKVEQVAMELRL
O95696_622	HIKHPMDFATMRKRLEAQGYKNLHEFEEDFDLIIDNCMKYN
O95696_739	RELLDMLDLTCAMKSSGSRSKRAKLLKKEIALLRNKLSQQH
O95696_745	LDLTCAMKSSGSRSKRAKLLKKEIALLRNKLSQQHSQPLPT
O95785_1275	VTEWSVNGSPIDTLREILKKKSKPCLIKKEPPAGDLAPALA
O95785_1277	EWSVNGSPIDTLREILKKKSKPCLIKKEPPAGDLAPALAED
O95785_933	ELVKQKGLPDAHLGLPPGLAKKSSSLKEVVAGAPRPGLLSL
O95817_361	VIRKEVDSKPVSQKPPPPSEKVEVKVPPAPVPCPPPSPGPS
O95817_409	SVATEERAAPSTAPAEATPPKPGEAEAPPKHPGVLKVEAIL
O95817_497	RQARRDGVRKVQTILEKLEQKAIDVPGQVQVYELQPSNLEA
O95817_534	NLEADQPLQAIMEMGAVAADKGKKNAGNAEDPHTETQQPEA
O95817_536	EADQPLQAIMEMGAVAADKGKKNAGNAEDPHTETQQPEATA
O95817_60	VDHNSRTTTWNDPRVPSEGPKETPSSANGPSREGSRLPPAR
O96019_371	AGGNTLIQSFTDRLNRELSQKTPPSMRLKLIANNTTVERRF
P00338_328	LTSEEEARLKKSADTLWGIQKELQFXXXXXXXXXXXXXXXX
P00492_186	KRTPRSVGYKPDFVGFEIPDKFVVGYALDYNEYFRDLNHVC
P00492_215	YNEYFRDLNHVCVISETGKAKYKAXXXXXXXXXXXXXXXXX
P00492_83	VALCVLKGGYKFFADLLDYIKALNRNSDRSIPMTVDFIRLK
P01100_148	KVEQLSPEEEEKRRIRRERNKMAAAKCRNRRRELTDTLQAE
P01106_269	SSDSEEEQEDEEEIDVVSVEKRQAPGKRSESGSPSAGGHSK
P01106_371	EENVKRRTHNVLERQRRNELKRSFFALRDQIPELENNEKAP
P02545_78	GLRLRITESEEVVSREVSGIKAAYEAELGDARKTLDSVAKE
P04075_139	TNGETTTQGLDGLSERCAQYKKDGADFAKWRCVLKIGEHTP
P04075_14	XXXXXXXMPYQYPALTPEQKKELSDIAHRIVAPGKGILAAD
P04075_140	NGETTTQGLDGLSERCAQYKKDGADFAKWRCVLKIGEHTPS
P04075_215	GDHDLKRCQYVTEKVLAAVYKALSDHHIYLEGTLLKPNMVT
P04075_243	YLEGTLLKPNMVTPGHACTQKFSHEEIAMATVTALRRTVPP
P04843_251	TRVIEVSHWGNIAVEENVDLKHTGAVLKGPFSRYDYQRQPD
P04843_258	HWGNIAVEENVDLKHTGAVLKGPFSRYDYQRQPDSGISSIR
P04843_281	FSRYDYQRQPDSGISSIRSFKTILPAAAQDVYYRDEIGNVS
P04843_327	ILDDSVEMEIRPRFPLFGGWKTHYIVGYNLPSYEYLYNLGD
P05423_237	VKVKEEPRDEEEEAKMKAPPKAARKTPGLPKDVSVAELLRE
P05423_262	TPGLPKDVSVAELLRELSLTKEEELLFLQLPDTLPGQPPTQ
P05423_333	ENACTLADLTEGQVGKLLIRKSGRVQLLLGKVTLDVTMGTA
P05423_343	EGQVGKLLIRKSGRVQLLLGKVTLDVTMGTACSFLQELVSV
P05423_380	LVSVGLGDSRTGEMTVLGHVKHKLVCSPDFESLLDHKHRXX
P05423_81	NIISRKIKEEPKEEVTVKKEKRERDRDRQREGHGRGRGRPE
P05549_257	RLSPPECLNASLLGGVLRRAKSKNGGRSLREKLDKIGLNLP
P05549_342	NRQHSDPNEQVTRKNMLLATKQICKEFTDLLAQDRSPLGNS
P05549_407	GSPAVCAAVTALQNYLTEALKAMDKMYLSNNPNSHTDNNAK
P05549_434	LSNNPNSHTDNNAKSSDKEEKHRKXXXXXXXXXXXXXXXXX
P05783_118	VRSLETENRRLESKIREHLEKKGPQVRDWSHYFKIIEDLRA
P05783_215	TRLQLETEIEALKEELLFMKKNHEEEVKGLQAQIASSGLTV
P05787_176	QEKLKLEAELGNMQGLVEDFKNKYEDEINKRTEMENEFVLI
P07355_249	FDRYKSYSPYDMLESIRKEVKGDLENAFLNLVQCIQNKPLY
P07355_266	KEVKGDLENAFLNLVQCIQNKPLYFADRLYDSMKGKGTRDK
P07355_28	LCKLSLEGDHSTPPSAYGSVKAYTNFDAERDALNIETAIKT
P07355_281	QCIQNKPLYFADRLYDSMKGKGTRDKVLIRIMVSRSEVDML
P07355_286	KPLYFADRLYDSMKGKGTRDKVLIRIMVSRSEVDMLKIRSE
P07355_80	LTNRSNAQRQDIAFAYQRRTKKELASALKSALSGHLETVIL
P07737_26	AYIDNLMADGTCQDAAIVGYKDSPSVWAAVPGKTFVNITPA
P07910_206	GKLKGDDLQAIKKELTQIKQKVDSLLENLEKIEKEQSKQAV
P07910_288	DDDDNEDRGDDQLELIKDDEKEAEEGEDDRDSANGEDDSXX
P07992_114	PGAKSNSIIVSPRQRGNPVLKFVRNVPWEFGDVIPDYVLGQ
P07992_162	SLRYHNLHPDYIHGRLQSLGKNFALRVLLVQVDVKDPQQAL
P08047_622	EACTCPYCKDSEGRGSGDPGKKKQHICHIQGCGKVYGKTSH
P08047_623	ACTCPYCKDSEGRGSGDPGKKKQHICHIQGCGKVYGKTSHL
P08047_624	CTCPYCKDSEGRGSGDPGKKKQHICHIQGCGKVYGKTSHLR
P08047_635	RGSGDPGKKKQHICHIQGCGKVYGKTSHLRAHLRWHTGERP
P08047_639	DPGKKKQHICHIQGCGKVYGKTSHLRAHLRWHTGERPFMCT
P08151_76	ARETNSCTEGPLFSSPRSAVKLTKKRALSISPLSDASLDLQ
P08151_79	TNSCTEGPLFSSPRSAVKLTKKRALSISPLSDASLDLQTVI
P08195_245	YRIGDLQAFQGHGAGNLAGLKGRLDYLSSLKVKGLVLGPIH
P08195_298	LQIDPNFGSKEDFDSLLQSAKKKSIRVILDLTPNYRGENSW
P08195_354	LEFWLQAGVDGFQVRDIENLKDASSFLAEWQNITKGFSEDR
P08195_396	LIAGTNSSDLQQILSLLESNKDLLLTSSYLSDSGSTGEHTK
P08579_103	YAKTDSDIISKMRGTFADKEKKKEKKKAKTVEQTATTTNKK
P08579_104	AKTDSDIISKMRGTFADKEKKKEKKKAKTVEQTATTTNKKP
P08579_107	DSDIISKMRGTFADKEKKKEKKKAKTVEQTATTTNKKPGQG
P08621_32	LFAPRDPIPYLPPLEKLPHEKHHNQPYCGIAPYIREFEDPR
P08729_179	GGRLEAELRSMQDVVEDFKNKYEDEINHRTAAENEFVVLKK
P09661_67	IDFSDNEIRKLDGFPLLRRLKTLLVNNNRICRIGEGLDQAL
P09874_1000	NDTSLLYNEYIVYDIAQVNLKYLLKLKFNFKTSLWXXXXXX
P09874_230	GDEVDGVDEVAKKKSKKEKDKDSKLEKALKAQNDLIWNIKD
P0C671_126	FFVRTGPEEPREKASRRPRGKEGISQHPEPLEAAGEPALRK
P0C671_285	QSLASQLGVALPNPAPAVRKKSQEKKTSLKRTSKTNPKKHG
P0C671_290	QLGVALPNPAPAVRKKSQEKKTSLKRTSKTNPKKHGSEEAK
P0C671_294	ALPNPAPAVRKKSQEKKTSLKRTSKTNPKKHGSEEAKRGAA
P0C671_451	KSQEKRSSFRRAFYHKKHTSKEPRRAGAAGAASPEARRPKR
P0C671_46	GKGSESWDCHWLSLPTAPSRKALHWTTSDWARHSDSPAPSA
P0C671_97	TPEETGDFLPSEQRPSQDTKKGWLKTMLNFFVRTGPEEPRE
P0DP91_193	SVKRQKYNKEQQLKKITAKQKHLQAILGGAEVKIELDHASL
P0DP91_287	EASGFEKYLADQAKLSFERKKQGCNKRAARKAPAPVTPPAP
P0DP91_292	EKYLADQAKLSFERKKQGCNKRAARKAPAPVTPPAPVQNKN
P0DP91_317	KAPAPVTPPAPVQNKNKPNKKARVLSKKEERLKKHIKKLQK
P0DP91_32	TQEQDCLQSQPVSNNEEMAIKQESGGDGEVEEYLSFRSVGD
P0DP91_323	TPPAPVQNKNKPNKKARVLSKKEERLKKHIKKLQKRALQFQ
P0DP91_324	PPAPVQNKNKPNKKARVLSKKEERLKKHIKKLQKRALQFQG
P0DP91_405	DDEVEGAEADLSGDGTDYELKPLPKGGKRQKKVPVQEIDDD
P0DP91_448	PSSGEEAEAASVGEGGGGGRKVGRYRDDGDEDYYKQRLSPK
P0DP91_462	GGGGGRKVGRYRDDGDEDYYKQRLSPKMPRTLSLHEITDLL
P0DP91_468	KVGRYRDDGDEDYYKQRLSPKMPRTLSLHEITDLLETDDSI
P0DP91_784	KFWCGATCLGYICWFQPYQGKNPNTKHEEYGVGASLVLQFS
P10071_467	GARGQQEQPEGTTLVKEEGDKDESKQEPEVIYETNCHWEGC
P10074_22	DGSFVQHSVRVLQELNKQREKGQYCDATLDVGGLVFKAHWS
P10074_622	RVENYNPRQRKLRNLIIEDEKMVVVALQPPAELEVGSAEVI
P10242_445	IGHKLTVTTPFHRDQTVKTQKENTVFRTPAIKRSILESSPR
P10243_389	PVAWSDVTSFDISDAAASPIKSTPVKLMRIQHNEGAMECQF
P10243_418	IQHNEGAMECQFNVSLVLEGKKNTCNGGNSEAVPLTSPNIA
P10243_692	CNLIPEKQDINSTNKTYTLTKKKPNPNTSKVVKLEKNLQSN
P10243_722	VVKLEKNLQSNCEWETVVYGKTEDQLIMTEQARRYLSTYTA
P10244_580	EDDIRPEKQKRKPGLRRSPIKKVRKSLALDIVDEDVKLMMS
P10809_133	TTTATVLARSIAKEGFEKISKGANPVEIRRGVMLAVDAVIA
P10809_192	ATISANGDKEIGNIISDAMKKVGRKGVITVKDGKTLNDELE
P10809_196	ANGDKEIGNIISDAMKKVGRKGVITVKDGKTLNDELEIIEG
P10809_89	GSPKVTKDGVTVAKSIDLKDKYKNIGAKLVQDVANNTNEEA
P11021_516	QIEVTFEIDVNGILRVTAEDKGTGNKNKITITNDQNRLTPE
P11021_547	TNDQNRLTPEEIERMVNDAEKFAEEDKKLKERIDTRNELES
P11021_573	KKLKERIDTRNELESYAYSLKNQIGDKEKLGGKLSSEDKET
P11142_500	IDANGILNVSAVDKSTGKENKITITNDKGRLSKEDIERMVQ
P11142_550	EKQRDKVSSKNSLESYAFNMKATVEDEKLQGKINDEDKQKI
P11142_569	MKATVEDEKLQGKINDEDKQKILDKCNEIINWLDKNQTAEK
P11142_573	VEDEKLQGKINDEDKQKILDKCNEIINWLDKNQTAEKEEFE
P11387_162	EDDADYKPKKIKTEDTKKEKKRKLEEEEDGKLKKPKNKDKD
P11387_179	KEKKRKLEEEEDGKLKKPKNKDKDKKVPEPDNKKKKPKKEE
P11387_193	LKKPKNKDKDKKVPEPDNKKKKPKKEEEQKWKWWEEERYPE
P11387_197	KNKDKDKKVPEPDNKKKKPKKEEEQKWKWWEEERYPEGIKW
P11387_218	EEEQKWKWWEEERYPEGIKWKFLEHKGPVFAPPYEPLPENV
P11387_262	YDGKVMKLSPKAEEVATFFAKMLDHEYTTKEIFRKNFFKDW
P11387_326	SQYFKAQTEARKQMSKEEKLKIKEENEKLLKEYGFCIMDNH
P11387_333	TEARKQMSKEEKLKIKEENEKLLKEYGFCIMDNHKERIANF
P11387_347	IKEENEKLLKEYGFCIMDNHKERIANFKIEPPGLFRGRGNH
P11387_673	AKKEQLADARRDLKSAKADAKVMKDAKTKKVVESKKKAVQR
P11387_676	EQLADARRDLKSAKADAKVMKDAKTKKVVESKKKAVQRLEE
P11387_68	KHSNSEHKDSEKKHKEKEKTKHKDGSSEKHKDKHKDRDKEK
P11387_681	ARRDLKSAKADAKVMKDAKTKKVVESKKKAVQRLEEQLMKL
P11387_687	SAKADAKVMKDAKTKKVVESKKKAVQRLEEQLMKLEVQATD
P11387_688	AKADAKVMKDAKTKKVVESKKKAVQRLEEQLMKLEVQATDR
P11387_689	KADAKVMKDAKTKKVVESKKKAVQRLEEQLMKLEVQATDRE
P11387_720	KLEVQATDREENKQIALGTSKLNYLDPRITVAWCKKWGVPI
P11387_735	ALGTSKLNYLDPRITVAWCKKWGVPIEKIYNKTQREKFAWA
P11388_1010	KLQTSLTCNSMVLFDHVGCLKKYDTVLDILRDFFELRLKYY
P11388_25	PLQPVNENMQVNKIKKNEDAKKRLSVERIYQKKTQLEHILL
P11388_343	GRHVDYVADQIVTKLVDVVKKKNKGGVAVKAHQVKNHMWIF
P11388_37	KIKKNEDAKKRLSVERIYQKKTQLEHILLRPDTYIGSVELV
P11388_582	PSLLRHRFLEEFITPIVKVSKNKQEMAFYSLPEFEEWKSST
P11388_863	PIIPMVLINGAEGIGTGWSCKIPNFDVREIVNNIRRLMDGE
P11474_330	LQLVRRLQALRLEREEYVLLKALALANSDSVHIEDAEAVEQ
P12004_190	SASGELGNGNIKLSQTSNVDKEEEAVTIEMNEPVQLTFALR
P12268_124	VRKVKKYEQGFITDPVVLSPKDRVRDVFEAKARHGFCGIPI
P12268_238	LVAIIARTDLKKNRDYPLASKDAKKQLLCGAAIGTHEDDKY
P12268_288	VDVVVLDSSQGNSIFQINMIKYIKDKYPNLQVIGGNVVTAA
P12757_529	VAAASSPLLVKDVICEDDKGKIMEEVMRTYLKQQEKLNLIL
P12757_544	EDDKGKIMEEVMRTYLKQQEKLNLILQKKQQLQMEVKMLSS
P12757_551	MEEVMRTYLKQQEKLNLILQKKQQLQMEVKMLSSSKSMKEL
P12757_580	KMLSSSKSMKELTEEQQNLQKELESLQNEHAQRMEEFYVEQ
P12757_601	ELESLQNEHAQRMEEFYVEQKDLEKKLEQIMKQKCTCDSNL
P12757_605	LQNEHAQRMEEFYVEQKDLEKKLEQIMKQKCTCDSNLEKDK
P12757_623	LEKKLEQIMKQKCTCDSNLEKDKEAEYAGQLAELRQRLDHA
P12757_663	AEADRQELQDELRQEREARQKLEMMIKELKLQILKSSKTAK
P12757_680	ARQKLEMMIKELKLQILKSSKTAKEXXXXXXXXXXXXXXXX
P12956_262	LLRKVRAKETRKRALSRLKLKLNKDIVISVGIYNLVQKALK
P12956_358	KRFDDPGLMLMGFKPLVLLKKHHYLRPSLFVYPEESLVIGS
P13056_286	QGDLSTLANVVTSLANLGKTKDLSQNSNEMSMIESLSNDDT
P13056_364	AGMEGSVHLITGDSSINYTEKEGPLLSDSHVAFRLTMPSPM
P13631_246	LWDKFSELATKCIIKIVEFAKRLPGFTGLSIADQITLLKAA
P13682_197	VIVNDCHLPESFKEEENQKCKKSGGKYSLNSGAVKNPKTQL
P13995_152	QLPLPEHIDERRICNAVSPDKDVDGFHVINVGRMCLDQYSM
P13995_185	MCLDQYSMLPATPWGVWEIIKRTGIPTLGKNVVVAGRSKNV
P13995_330	GGVGPMTVAMLMKNTIIAAKKVLRLEEREVLKSKELGVATN
P13995_343	NTIIAAKKVLRLEEREVLKSKELGVATNXXXXXXXXXXXXX
P13995_44	RLRPFHLAAVRNEAVVISGRKLAQQIKQEVRQEVEEWVASG
P14316_31	WLEEQINSNTIPGLKWLNKEKKIFQIPWMHAARHGWDVEKD
P14316_32	LEEQINSNTIPGLKWLNKEKKIFQIPWMHAARHGWDVEKDA
P14316_337	MTPASSSSRPDRETRASVIKKTSDITQARVKSCXXXXXXXX
P15408_126	IGTTVGRRRRDEQLSPEEEEKRRIRRERNKLAAAKCRNRRR
P15408_151	RERNKLAAAKCRNRRRELTEKLQAETEELEEEKSGLQKEIA
P15923_570	RRVANNARERLRVRDINEAFKELGRMCQLHLNSEKPQTKLL
P15923_614	QAVSVILNLEQQVRERNLNPKAACLKRREEEKVSGVVGDPQ
P17027_147	NSYQCHTITGEQPSGCTGLGKSISFDTKLVKHEIINSEERP
P17027_169	ISFDTKLVKHEIINSEERPFKCEELVEPFRCDSQLIQHQEN
P17098_255	HRDSSQAIPITELTKSQVQDKPYKCTDCGKSFNHNAHLTVH
P17275_289	IKVERKRLRNRLAATKCRKRKLERIARLEDKVKTLKAENAG
P17676_315	RNLETQHKVLELTAENERLQKKVEQLSRELSTLRNLFKQLP
P17844_328	SANHNILQIVDVCHDVEKDEKLIRLMEEIMSEKENKTIVFV
P17844_360	KENKTIVFVETKRRCDELTRKMRRDGWPAMGIHGDKSQQER
P18583_141	KKKEKEKKYKRQPEESESKTKSHDDGNIDLESDSFLKFDSE
P18583_1520	IGMQEIALHSGEEPHAEEHLKGDFYESEHGINIDLNINNHL
P18583_1662	VISTSPSGGSEADIEGPLPAKDIHLDLPSNNNLVSKDTEEP
P18583_1804	SEEKDDYEIFVKVKDTHEKSKKNKNRDKGEKEKKRDSSLRS
P18583_1807	KDDYEIFVKVKDTHEKSKKNKNRDKGEKEKKRDSSLRSRSK
P18583_1814	VKVKDTHEKSKKNKNRDKGEKEKKRDSSLRSRSKRSKSSEH
P18583_2048	FSRSPIRRKRSRSSERGRSPKRLTDLDKAQLLEIAKANAAA
P18583_2235	NLPSEPVDISTAMSERALAQKRLSENAFDLEAMSMLNRAQE
P18583_2294	TGVQVLTQEQLANTGAQAWIKKDQFLRAAPVTGGMGAVLMR
P18583_2328	MGAVLMRKMGWREGEGLGKNKEGNKEPILVDFKTDRKGLVA
P18583_366	VPSEIADSSMTRPQELPELPKTTALELQESSVASAMELPGP
P18615_21	MLVIPPGLSEEEEALQKKFNKLKKKKKALLALKKQSSSSTT
P18615_25	PPGLSEEEEALQKKFNKLKKKKKALLALKKQSSSSTTSQGG
P18615_26	PGLSEEEEALQKKFNKLKKKKKALLALKKQSSSSTTSQGGV
P18615_27	GLSEEEEALQKKFNKLKKKKKALLALKKQSSSSTTSQGGVK
P18846_234	LKREIRLMKNREAARECRRKKKEYVKCLENRVAVLENQNKT
P18846_263	NRVAVLENQNKTLIEELKTLKDLYSNKSVXXXXXXXXXXXX
P18847_107	ERKKRRRERNKIAAAKCRNKKKEKTECLQKESEKLESVNAE
P18847_110	KRRRERNKIAAAKCRNKKKEKTECLQKESEKLESVNAELKA
P18847_116	NKIAAAKCRNKKKEKTECLQKESEKLESVNAELKAQIEELK
P18847_136	KESEKLESVNAELKAQIEELKNEKQHLIYMLNLHRPTCIVR
P18848_132	LLTTLDDTCDLFAPLVQETNKQPPQTVNPIGHLPESLTKPD
P18848_283	PPGEKMVAAKVKGEKLDKKLKKMEQNKTAATRYRQKKRAEQ
P18848_284	PGEKMVAAKVKGEKLDKKLKKMEQNKTAATRYRQKKRAEQE
P18850_356	ARLKAALSENEQLKKENGTLKRQLDEVVSENQRLKVPSPKR
P18850_375	LKRQLDEVVSENQRLKVPSPKRRVVCVMIVLAFIILNYGPM
P18887_260	ESPKGKRKLDLNQEEKKTPSKPPAQLSPSVPKRPKLPAPTR
P18887_271	NQEEKKTPSKPPAQLSPSVPKRPKLPAPTRTPATAPVPARA
P18887_341	QGVVVVLSGFQNPFRSELRDKALELGAKYRPDWTRDSTHLI
P18887_450	QKQPQTKTKPTQAAGPSSPQKPPTPEETKAASPVLQEDIDI
P18887_458	KPTQAAGPSSPQKPPTPEETKAASPVLQEDIDIEGVQSEGQ
P19338_220	DDEEDDSEEEAMETTPAKGKKAAKVVPVKAKNVAEDEDEEE
P19338_230	AMETTPAKGKKAAKVVPVKAKNVAEDEDEEEDDEDEDDDDD
P19338_380	LEKALELTGLKVFGNEIKLEKPKGKDSKKERDARTLLAKNL
P19338_382	KALELTGLKVFGNEIKLEKPKGKDSKKERDARTLLAKNLPY
P19532_259	PTGSAPNSPMALLTIGSSSEKEIDDVIDEIISLESSYNDEM
P19532_343	PAELPNIKREISETEAKALLKERQKKDNHNLIERRRRFNIN
P19532_348	NIKREISETEAKALLKERQKKDNHNLIERRRRFNINDRIKE
P19532_407	TILKASVDYIRKLQKEQQRSKDLESRQRSLEQANRSLQLRI
P19838_79	YVCEGPSHGGLPGASSEKNKKSYPQVKICNYVGPAKVIVQL
P20042_132	EPEDDLDIMLGNKKKKKKNVKFPDEDEILEKDEALEDEDNK
P20042_17	XXXXMSGDEMIFDPTMSKKKKKKKKPFMLDEEGDTQTEETQ
P20042_18	XXXMSGDEMIFDPTMSKKKKKKKKPFMLDEEGDTQTEETQP
P20042_259	FLLAELGTSGSIDGNNQLVIKGRFQQKQIENVLRRYIKEYV
P20042_276	LVIKGRFQQKQIENVLRRYIKEYVTCHTCRSPDTILQKDTR
P20273_380	LPTNYTWYHNGKEMQGRTEEKVHIPKILPWHAGTYSCVAEN
P20700_167	AALATALGDKKSLEGDLEDLKDQIAQLEASLAAAKKQLADE
P20700_191	AQLEASLAAAKKQLADETLLKVDLENRCQSLTEDLEFRKSM
P20810_100	NKKAVSRSAEQQPSEKSTEPKTKPQDMISAGGESVAGITAI
P20810_123	PQDMISAGGESVAGITAISGKPGDKKKEKKSLTPAVPVESK
P20810_146	DKKKEKKSLTPAVPVESKPDKPSGKSGMDAALDDLIDTLGG
P20810_196	TYTGPEVSDPMSSTYIEELGKREVTIPPKYRELLAKKEGIT
P20810_204	DPMSSTYIEELGKREVTIPPKYRELLAKKEGITGPPADSSK
P20810_211	IEELGKREVTIPPKYRELLAKKEGITGPPADSSKPIGPDDA
P20810_212	EELGKREVTIPPKYRELLAKKEGITGPPADSSKPIGPDDAI
P20810_23	PTETKAIPVSQQMEGPHLPNKKKHKKQAVKTEPEKKSQSTK
P20810_24	TETKAIPVSQQMEGPHLPNKKKHKKQAVKTEPEKKSQSTKL
P20810_25	ETKAIPVSQQMEGPHLPNKKKHKKQAVKTEPEKKSQSTKLS
P20810_250	DAIDALSSDFTCGSPTAAGKKTEKEESTEVLKAQSAGTVRS
P20810_27	KAIPVSQQMEGPHLPNKKKHKKQAVKTEPEKKSQSTKLSVV
P20810_277	TEVLKAQSAGTVRSAAPPQEKKRKVEKDTMSDQALEALSAS
P20810_280	LKAQSAGTVRSAAPPQEKKRKVEKDTMSDQALEALSASLGT
P20810_382	PRSESELIDELSEDFDRSECKEKPSKPTEKTEESKAAAPAP
P20810_391	ELSEDFDRSECKEKPSKPTEKTEESKAAAPAPVSEAVCRTS
P20810_396	FDRSECKEKPSKPTEKTEESKAAAPAPVSEAVCRTSMCSIQ
P20810_444	TLKGTVPDDAVEALADSLGKKEADPEDGKPVMDKVKEKAKE
P20810_487	REKLGEKEETIPPDYRLEEVKDKDGKPLLPKESKEQLPPMS
P20810_50	AVKTEPEKKSQSTKLSVVHEKKSQEGKPKEHTEPKSLPKQA
P20810_500	DYRLEEVKDKDGKPLLPKESKEQLPPMSEDFLLDALSEDFS
P20810_534	ALSEDFSGPQNASSLKFEDAKLAAAISEVVSQTPASTTQAG
P20810_643	DDNGQDKPVKPPTKKSEDSKKPADDQDPIDALSGDLDSCPS
P20810_684	TTETSQNTAKDKCKKAASSSKAPKNGGKAKDSAKTTEETSK
P20810_693	KDKCKKAASSSKAPKNGGKAKDSAKTTEETSKPKDDXXXXX
P20810_704	KAPKNGGKAKDSAKTTEETSKPKDDXXXXXXXXXXXXXXXX
P20810_95	SNDAHNKKAVSRSAEQQPSEKSTEPKTKPQDMISAGGESVA
P21127_104	AIKPPQQMSRKEKAHHRKDEKRKEKRRHRSHSAEGGKHARV
P21127_106	KPPQQMSRKEKAHHRKDEKRKEKRRHRSHSAEGGKHARVKE
P21127_125	RKEKRRHRSHSAEGGKHARVKEKEREHERRKRHREEQDKAR
P21127_127	EKRRHRSHSAEGGKHARVKEKEREHERRKRHREEQDKARRE
P21127_250	HWSRSPPRPPRERFELGDGRKPGEARPAPAQKPAQLKEEKM
P21127_269	RKPGEARPAPAQKPAQLKEEKMEERDLLSDLQDISDSERKT
P21127_458	FQCLNRIEEGTYGVVYRAKDKKTDEIVALKRLKMEKEKEGF
P21127_524	VVGSNMDKIYIVMNYVEHDLKSLMETMKQPFLPGEVKTLMI
P21333_676	LSPFMADIRDAPQDFHPDRVKARGPGLEKTGVAVNKPAEFT
P21675_1263	LKGPPEKKPKKMKERPDLKLKCGACGAIGHMRTNKFCPLYY
P21675_1277	RPDLKLKCGACGAIGHMRTNKFCPLYYQTNAPPSNPVAMTE
P21675_237	HDATKLLPSVTELFPEFRPGKVLRFLRLFGPGKNVPSVWRS
P21675_249	LFPEFRPGKVLRFLRLFGPGKNVPSVWRSARRKRKKKHREL
P21675_263	RLFGPGKNVPSVWRSARRKRKKKHRELIQEEQIQEVECSVE
P21675_330	EITMMAPVESKFSQSTGDIDKVTDTKPRVAEWRYGPARLWY
P21675_335	APVESKFSQSTGDIDKVTDTKPRVAEWRYGPARLWYDMLGV
P21675_611	HSIPAVELRQPFFPTHMGPIKLRQFHRPPLKKYSFGALSQP
P21675_797	VDIFVVGQQCPLFEVPGPNSKRANTHIRDFLQVFIYRLFWK
P21675_817	KRANTHIRDFLQVFIYRLFWKSKDRPRRIRMEDIKKAFPSH
P21675_819	ANTHIRDFLQVFIYRLFWKSKDRPRRIRMEDIKKAFPSHSE
P21675_943	IDDEVRTAPWNTTRAFIAAMKGKCLLEVTGVADPTGCGEGF
P21675_971	TGVADPTGCGEGFSYVKIPNKPTQQKDDKEPQPVKKTVTGT
P22415_286	QGLDQLQLDNDVLRQQVEDLKNKNLLLRAQLRHHGLEVVIK
P22415_48	PTSVAIASIQSAATFPDPNVKYVFRTENGGQVMYRVIQVSE
P23025_31	AAALEQPAELPASVRASIERKRQRALMLRQARLAARPYSAT
P23246_57	GMGLNQNRGPMGPGPGQSGPKPPIPPPPPHQQQQQPPPQQP
P23497_447	HGEKAPMTSRSTSTWRIPSRKRRFSSSDFSDLSNGEELQET
P23497_532	SDMMDTMDVENNSTLEKHSGKRRKKRRHRSKVNGLQRGRKK
P23497_854	AAYRAKGKPNSAKKRVVKAEKSKKKKEEEEDEEDEQEEENE
P23497_858	AKGKPNSAKKRVVKAEKSKKKKEEEEDEEDEQEEENEEDDD
P23528_125	APESAPLKSKMIYASSKDAIKKKLTGIKHELQANCYEEVKD
P23588_453	SSRNARRRESEKSLENETLNKEEDCHSPTSKPPKPDQPLKV
P23588_480	PTSKPPKPDQPLKVMPAPPPKENAWVKRSSNPPARSQSSDT
P26358_1003	SNLDAPEPYRIGRIKEIFCPKKSNGRPNETDIKIRVNKFYR
P26358_1119	PPNHARSPGNKGKGKGKGKGKPKSQACEPSEPEIEIKLPKL
P26358_1138	GKPKSQACEPSEPEIEIKLPKLRTLDVFSGCGGLSEGFHQA
P26358_1196	AFRLNNPGSTVFTEDCNILLKLVMAGETTNSRGQRLPQKGD
P26358_1242	GGPPCQGFSGMNRFNSRTYSKFKNSLVVSFLSYCDYYRPRF
P26358_1281	RFFLLENVRNFVSFKRSMVLKLTLRCLVRMGYQCTFGVLQA
P26358_1348	PEPLHVFAPRACQLSVVVDDKKFVSNITRLSSGPFRTITVR
P26358_1415	WFQRQLRGAQYQPILRDHICKDMSALVAARMRHIPLAPGSD
P26358_142	MADANSPPKPLSKPRTPRRSKSDGEAKPEPSPSPRITRKST
P26358_1483	KNGRSSSGALRGVCSCVEAGKACDPAARQFNTLIPWCLPHT
P26358_1535	GRLEWDGFFSTTVTNPEPMGKQGRVLHPEQHRVVSVRECAR
P26358_1586	FGNILDKHRQVGNAVPPPLAKAIGLEIKLCMLAKARESASA
P26358_905	TEDNKFKFCVSCARLAEMRQKEIPRVLEQLEDLDSRVLYYS
P26368_444	VEVPGCGKIFVEFTSVFDCQKAMQGLTGRKFANRVVVTKYC
P26368_453	FVEFTSVFDCQKAMQGLTGRKFANRVVVTKYCDPDSYHRRD
P26368_84	PLTRGAKEEHGGLIRSPRHEKKKKVRKYWDVPPPGFEHITP
P26641_228	KLCEKMAQFDAKKFAETQPKKDTPRKEKGSREEKQKPQAER
P27348_122	DKYLIANATNPESKVFYLKMKGDYFRYLAEVACGDDRKQTI
P27348_157	DRKQTIDNSQGAYQEAFDISKKEMQPTHPIRLGLALNFSVF
P27540_334	AWPPAGVSLPDDDPEAGQGSKFCLVAIGRLQVTSSPNCTDM
P27816_1015	VSKKVSYSHIQSKCGSKDNIKHVPGGGNVQIQNKKVDISKV
P27816_1048	KKVDISKVSSKCGSKANIKHKPGGGDVKIESQKLNFKEKAQ
P27816_1087	AQAKVGSLDNVGHLPAGGAVKTEGGGSEAPLCPGPPAGEEP
P27816_142	DTNFCFQPEQVVDPIQTDPFKMYHDDDLADLVFPSSATADT
P27816_173	VFPSSATADTSIFAGQNDPLKDSYGMSPCNTAVVPQGWSVE
P27816_22	ADLSLADALTEPSPDIEGEIKRDFIATLEAEAFDDVVGETV
P27816_254	PPAQALEIMMGLKTTDMAPSKETEMALAKDMALATKTEVAL
P27816_276	TEMALAKDMALATKTEVALAKDMESPTKLDVTLAKDMQPSM
P27816_312	MQPSMESDMALVKDMELPTEKEVALVKDVRWPTETDVSSAK
P27816_352	KNVVLPTETEVAPAKDVTLLKETERASPIKMDLAPSKDMGP
P27816_368	VTLLKETERASPIKMDLAPSKDMGPPKENKKETERASPIKM
P27816_377	ASPIKMDLAPSKDMGPPKENKKETERASPIKMDLAPSKDMG
P27816_378	SPIKMDLAPSKDMGPPKENKKETERASPIKMDLAPSKDMGP
P27816_44	DFIATLEAEAFDDVVGETVGKTDYIPLLDVDEKTGNSESKK
P27816_56	DVVGETVGKTDYIPLLDVDEKTGNSESKKKPCSETSQIEDT
P27816_590	VTPAKDVPPLSETEATPVPIKDMEIAQTQKGISEDSHLESL
P27816_633	VGQSAAPTFMISPETVTGTGKKCSLPAEEDSVLEKLGERKP
P27816_634	GQSAAPTFMISPETVTGTGKKCSLPAEEDSVLEKLGERKPC
P27816_652	GKKCSLPAEEDSVLEKLGERKPCNSQPSELSSETSGIARPE
P27816_726	TTQPAKTSTSKAKTQPTSLPKQPAPTTIGGLNKKPMSLASG
P27816_738	KTQPTSLPKQPAPTTIGGLNKKPMSLASGLVPAAPPKRPAV
P27816_739	TQPTSLPKQPAPTTIGGLNKKPMSLASGLVPAAPPKRPAVA
P27816_772	PPKRPAVASARPSILPSKDVKPKPIADAKAPEKRASPSKPA
P27816_774	KRPAVASARPSILPSKDVKPKPIADAKAPEKRASPSKPASA
P27816_780	SARPSILPSKDVKPKPIADAKAPEKRASPSKPASAPASRSG
P27816_862	KPAEVKKMTAKSVPADLSRPKSTSTSSMKKTTTLSGTAPAA
P27816_870	TAKSVPADLSRPKSTSTSSMKKTTTLSGTAPAAGVVPSRVK
P27816_890	KKTTTLSGTAPAAGVVPSRVKATPMPSRPSTTPFIDKKPTS
P27816_938	PRLSRLATNTSAPDLKNVRSKVGSTENIKHQPGGGRAKVEK
P28290_29	AEAEEELEWQVASRRRKAWAKCRSSWQASETEDLSTEATTQ
P28290_297	NKETDPPPPLTRSNTANRLMKTLSKLNLCVDKTEKGESSSP
P28290_301	DPPPPLTRSNTANRLMKTLSKLNLCVDKTEKGESSSPSPSA
P28290_308	RSNTANRLMKTLSKLNLCVDKTEKGESSSPSPSAEKGKILN
P28290_311	TANRLMKTLSKLNLCVDKTEKGESSSPSPSAEKGKILNVSV
P28290_323	NLCVDKTEKGESSSPSPSAEKGKILNVSVIEESGNKNDQKS
P28290_342	EKGKILNVSVIEESGNKNDQKSQKIMKKKESSSMLATVKEE
P28290_345	KILNVSVIEESGNKNDQKSQKIMKKKESSSMLATVKEEVSG
P28290_348	NVSVIEESGNKNDQKSQKIMKKKESSSMLATVKEEVSGSSA
P28290_349	VSVIEESGNKNDQKSQKIMKKKESSSMLATVKEEVSGSSAA
P28290_350	SVIEESGNKNDQKSQKIMKKKESSSMLATVKEEVSGSSAAV
P28324_58	AEEVARLWGIRKNKPNMNYDKLSRALRYYYVKNIIKKVNGQ
P28324_69	KNKPNMNYDKLSRALRYYYVKNIIKKVNGQKFVYKFVSYPE
P28324_79	LSRALRYYYVKNIIKKVNGQKFVYKFVSYPEILNMDPMTVG
P28324_83	LRYYYVKNIIKKVNGQKFVYKFVSYPEILNMDPMTVGRIEG
P28340_414	TGYNIQNFDLPYLISRAQTLKVQTFPFLGRVAGLCSNIRDS
P28370_433	IKIYLGLSKMQREWYTKILMKDIDVLNSSGKMDKMRLLNIL
P28370_52	STSQEEGAAAAATEATAATEKGEKKKEKNVSSFQLKLAAKA
P28370_773	RKANYAVDAYFREALRVSEPKIPKAPRPPKQPNVQDFQFFP
P28370_93	PKSEKEMDPEYEEKMKADRAKRFEFLLKQTELFAHFIQPSA
P29374_109	YTVVFDDGDERTLRRTSLCLKGERHFAESETLDQLPLTNPE
P29374_1159	RSPARISPHIKDGEKDKHREKHPNSSPRTYKWSFQLNELDN
P29374_1219	YYMSLKSEVATIDRRRKRLKKKDREVSHAGASMSSASSDTG
P29374_1220	YMSLKSEVATIDRRRKRLKKKDREVSHAGASMSSASSDTGM
P29374_208	TEWYPALVISPSCNDDITVKKDQCLVRSFIDSKFYSIARKD
P29374_220	CNDDITVKKDQCLVRSFIDSKFYSIARKDIKEVDILNLPES
P29374_230	QCLVRSFIDSKFYSIARKDIKEVDILNLPESELSTKPGLQK
P29374_28	AYLTVGTDVSAKYRGAFCEAKIKTVKRLVKVKVLLKQDNTT
P29374_293	ESSSSDDEDGPAEENDEEKEKEAKKTEEEVPEEELDPEERD
P29374_296	SSDDEDGPAEENDEEKEKEAKKTEEEVPEEELDPEERDNFL
P29374_30	LTVGTDVSAKYRGAFCEAKIKTVKRLVKVKVLLKQDNTTQL
P29374_33	GTDVSAKYRGAFCEAKIKTVKRLVKVKVLLKQDNTTQLVQD
P29374_339	LYKFMEDRGTPINKPPVLGYKDLNLFKLFRLVYHQGGCDNI
P29374_345	DRGTPINKPPVLGYKDLNLFKLFRLVYHQGGCDNIDSGAVW
P29374_366	LFRLVYHQGGCDNIDSGAVWKQIYMDLGIPILNSAASYNVK
P29374_37	SAKYRGAFCEAKIKTVKRLVKVKVLLKQDNTTQLVQDDQVK
P29374_522	DVDDDYETAEKKENELLLGRKNTPKQKEKKIKKQEDSDKDS
P29374_526	DYETAEKKENELLLGRKNTPKQKEKKIKKQEDSDKDSDEEE
P29374_528	ETAEKKENELLLGRKNTPKQKEKKIKKQEDSDKDSDEEEEK
P29374_558	SDKDSDEEEEKSQEREETESKCDSEGEEDEEDMEPCLTGTK
P29374_57	KVKVLLKQDNTTQLVQDDQVKGPLRVGAIVETRTSDGSFQE
P29374_582	EGEEDEEDMEPCLTGTKVKVKYGRGKTQKIYEASIKSTEID
P29374_587	EEDMEPCLTGTKVKVKYGRGKTQKIYEASIKSTEIDDGEVL
P29374_597	TKVKVKYGRGKTQKIYEASIKSTEIDDGEVLYLVHYYGWNV
P29374_685	KRGRPPLKSTLSSNMPYGLSKTANSEGKSDSCSSDSETEDA
P29375_1507	DSMEEKPLKVKGKDSSEKKRKRKLEKVEQLFGEGKQKSKEL
P29375_1523	EKKRKRKLEKVEQLFGEGKQKSKELKKMDKPRKKKLKLGAD
P29375_1550	MDKPRKKKLKLGADKSKELNKLAKKLAKEEERKKKKEKAAA
P29375_1594	ELVKESTEKKREKKVLDIPSKYDWSGAEESDDENAVCAAQN
P29375_1620	AEESDDENAVCAAQNCQRPCKDKVDWVQCDGGCDEWFHQVC
P29375_267	KVVGLAMGTKDKEDEVTRRRKVTNRSDAFNMQMRQRKGTLS
P29375_332	DGCDDSYHTFCLIPPLPDVPKGDWRCPKCVAEECSKPREAF
P29375_347	LPDVPKGDWRCPKCVAEECSKPREAFGFEQAVREYTLQSFG
P29375_501	CWHIEDHWSYSINYLHWGEPKTWYGVPSHAAEQLEEVMREL
P29375_55	FIGRIRPLAEKTGICKIRPPKDWQPPFACEVKSFRFTPRVQ
P29375_619	VNHYRRLRRHCVFSHEELIFKMAADPECLDVGLAAMVCKEL
P29375_66	TGICKIRPPKDWQPPFACEVKSFRFTPRVQRLNELEAMTRV
P29375_714	PERLVCLYHPTDLCPCPMQKKCLRYRYPLEDLPSLLYGVKV
P29401_524	TVIGAGVTLHEALAAAELLKKEKINIRVLDPFTIKPLDRKL
P30414_128	LLSMANRGKHTNGSQFFITTKPAPHLDGVHVVFGLVISGFE
P30414_1283	RIEIKSKNKVRPGSLFDEVRKTARLNRRPRNQESSSDEQTP
P30414_157	HVVFGLVISGFEVIEQIENLKTDAASRPYADVRVIDCGVLA
P30414_231	SSESELEHERSRRRKHKRRPKVKRSKKRRKEASSSEEPRNK
P30414_435	YSDLSTARHSGHHKKRRKEKKVKHKKKGKKQKHCRRHKQTK
P30414_669	TYSLANIKETGSSSSYHKREKNSESDQSTYSKYSDRSSESS
P30414_680	SSSSYHKREKNSESDQSTYSKYSDRSSESSPRSRSRSSRSR
P30414_731	SLASSHSRSRSPSSRSHSRNKYSDHSQCSRSSSYTSISSDD
P30414_825	LDYSSDSEQSSVQATQSAQEKEKQGQMERTHNKQEKNRGEE
P30414_858	QEKNRGEEKSKSERECPHSKKRTLKENLSDHLRNGSKPKRK
P30414_876	SKKRTLKENLSDHLRNGSKPKRKNYAGSKWDSESNSERDVT
P30414_878	KRTLKENLSDHLRNGSKPKRKNYAGSKWDSESNSERDVTKN
P30414_976	STSDSEGSCSNSENNRGKPQKHKHGSKENLKREHTKKVKEK
P30414_978	SDSEGSCSNSENNRGKPQKHKHGSKENLKREHTKKVKEKLK
P31948_239	PENKKQALKEKELGNDAYKKKDFDTALKHYDKAKELDPTNM
P31948_388	NECFQKGDYPQAMKHYTEAIKRNPKDAKLYSNRAACYTKLL
P31948_434	LKDCEECIQLEPTFIKGYTRKAAALEAMKDYTKAMDVYQKA
P31948_73	DYQKAYEDGCKTVDLKPDWGKGYSRKAAALEFLNRFEEAKR
P33176_342	AKTIKNTVCVNVELTAEQWKKKYEKEKEKNKILRNTIQWLE
P33176_352	NVELTAEQWKKKYEKEKEKNKILRNTIQWLENELNRWRNGE
P33176_541	DELNQKSATLASIDAELQKLKEMTNHQKKRAAEMMASLLKD
P33176_549	TLASIDAELQKLKEMTNHQKKRAAEMMASLLKDLAEIGIAV
P33176_575	MASLLKDLAEIGIAVGNNDVKQPEGTGMIDEEFTVARLYIS
P33176_596	QPEGTGMIDEEFTVARLYISKMKSEVKTMVKRCKQLESTQT
P33176_598	EGTGMIDEEFTVARLYISKMKSEVKTMVKRCKQLESTQTES
P33176_602	MIDEEFTVARLYISKMKSEVKTMVKRCKQLESTQTESNKKM
P33176_606	EFTVARLYISKMKSEVKTMVKRCKQLESTQTESNKKMEENE
P33176_627	RCKQLESTQTESNKKMEENEKELAACQLRISQHEAKIKSLT
P33176_644	ENEKELAACQLRISQHEAKIKSLTEYLQNVEQKKRQLEESV
P33176_657	SQHEAKIKSLTEYLQNVEQKKRQLEESVDALSEELVQLRAQ
P33176_67	AFDRVFQSSTSQEQVYNDCAKKIVKDVLEGYNGTIFAYGQT
P33176_679	QLEESVDALSEELVQLRAQEKVHEMEKEHLNKVQTANEVKQ
P33176_68	FDRVFQSSTSQEQVYNDCAKKIVKDVLEGYNGTIFAYGQTS
P33176_690	ELVQLRAQEKVHEMEKEHLNKVQTANEVKQAVEQQIQSHRE
P33176_698	EKVHEMEKEHLNKVQTANEVKQAVEQQIQSHRETHQKQISS
P33176_71	VFQSSTSQEQVYNDCAKKIVKDVLEGYNGTIFAYGQTSSGK
P33176_714	ANEVKQAVEQQIQSHRETHQKQISSLRDEVEAKAKLITDLQ
P33176_726	QSHRETHQKQISSLRDEVEAKAKLITDLQDQNQKMMLEQER
P33176_753	LQDQNQKMMLEQERLRVEHEKLKATDQEKSRKLHELTVMQD
P33176_755	DQNQKMMLEQERLRVEHEKLKATDQEKSRKLHELTVMQDRR
P33176_761	MLEQERLRVEHEKLKATDQEKSRKLHELTVMQDRREQARQD
P33176_812	ELQTLHNLRKLFVQDLATRVKKSAEIDSDDTGGSAAQKQKI
P33176_829	TRVKKSAEIDSDDTGGSAAQKQKISFLENNLEQLTKVHKQL
P33176_844	GSAAQKQKISFLENNLEQLTKVHKQLVRDNADLRCELPKLE
P33176_847	AQKQKISFLENNLEQLTKVHKQLVRDNADLRCELPKLEKRL
P33176_865	VHKQLVRDNADLRCELPKLEKRLRATAERVKALESALKEAK
P33176_882	KLEKRLRATAERVKALESALKEAKENASRDRKRYQQEVDRI
P33176_893	RVKALESALKEAKENASRDRKRYQQEVDRIKEAVRSKNMAR
P33991_578	LQTGALVLSDNGICCIDEFDKMNESTRSVLHEVMEQQTLSI
P33991_796	PRTGIVDISILTTGMSATSRKRKEELAEALKKLILSKGKTP
P35221_120	QGDLMKAAAGEFADDPCSSVKRGNMVRAARALLSAVTRLLI
P35221_149	RALLSAVTRLLILADMADVYKLLVQLKVVEDGILKLRNAGN
P35221_178	EDGILKLRNAGNEQDLGIQYKALKPEVDKLNIMAAKRQQEL
P35221_374	NAGRKERSDALNSAIDKMTKKTRDLRRQLRKAVMDHVSDSF
P35221_384	LNSAIDKMTKKTRDLRRQLRKAVMDHVSDSFLETNVPLLVL
P35221_409	HVSDSFLETNVPLLVLIEAAKNGNEKEVKEYAQVFREHANK
P35221_488	ALALAAKPQSKLAQENMDLFKEQWEKQVRVLTDAVDDITSI
P35221_51	PLVTQVTTLVNTNSKGPSNKKRGRSKKAHVLAASVEQATEN
P35221_56	VTTLVNTNSKGPSNKKRGRSKKAHVLAASVEQATENFLEKG
P35221_748	DFTRGKGPLKNTSDVISAAKKIAEAGSRMDKLGRTIADHCP
P35221_81	LAASVEQATENFLEKGDKIAKESQFLKEELVAAVEDVRKQG
P35221_883	APEKKPLVKREKQDETQTKIKRASQKKHVNPVQALSEFKAM
P35221_888	PLVKREKQDETQTKIKRASQKKHVNPVQALSEFKAMDSIXX
P35251_1032	SQGVDGVQDVVALMDTYYLMKEDFENIMEISSWGGKPSPFS
P35251_1053	EDFENIMEISSWGGKPSPFSKLDPKVKAAFTRAYNKEAHLT
P35251_119	SRQDPVTYISETDEEDDFMCKKAASKSKENGRSTNSHLGTS
P35251_120	RQDPVTYISETDEEDDFMCKKAASKSKENGRSTNSHLGTSN
P35251_314	KESQQHSKSSADKIGEVSSPKASSKLAIMKRKEESSYKEIE
P35251_41	VKKNEKTKSDEETLKAKKGIKEIKVNSSRKEDDFKQKQPSK
P35251_427	LEGLIFVITGVLESIERDEAKSLIERYGGKVTGNVSKKTNY
P35251_436	GVLESIERDEAKSLIERYGGKVTGNVSKKTNYLVMGRDSGQ
P35251_444	DEAKSLIERYGGKVTGNVSKKTNYLVMGRDSGQSKSDKAAA
P35251_458	TGNVSKKTNYLVMGRDSGQSKSDKAAALGTKIIDEDGLLNL
P35251_842	CARSKALTYDQAKADSHRAKKDIKMGPFDVARKVFAAGEET
P35251_870	DVARKVFAAGEETAHMSLVDKSDLFFHDYSIAPLFVQENYI
P35251_88	DSDSESEETLQVKNAKKPPEKLPVSSKPGKISRQDPVTYIS
P35251_893	LFFHDYSIAPLFVQENYIHVKPVAAGGDMKKHLMLLSRAAD
P35658_211	STVAVTSVCWSPKGKQLAVGKQNGTVVQYLPTLQEKKVIPC
P35658_36	DFQFRALKKVRIFDSPEELPKERSSLLAVSNKYGLVFAGGA
P35658_411	LLSTDGVLCPFYMINQNPGVKSLIKTPERLSLEGERQPKSP
P35658_65	SNKYGLVFAGGASGLQIFPTKNLLIQNKPGDDPNKIVDKVQ
P35658_665	PSPSGRSAQGSSSPVPSMVQKSPRITPPAAKPGSPQAKSLQ
P35658_675	SSSPVPSMVQKSPRITPPAAKPGSPQAKSLQPAVAEKQGHQ
P35658_769	TFLLEIKETTESLHGDISSLKTTLLEGFAGVEEAREQNERN
P35658_800	EEAREQNERNRDSGYLHLLYKRPLDPKSEAQLQEIRRLHQY
P36578_307	TDLSRILKSPEIQRALRAPRKKIHRRVLKKNPLKNLRIMLK
P36578_375	AAAAAALQAKSDEKAAVAGKKPVVGKKGKKAAVGVKKQKKP
P36578_394	KKPVVGKKGKKAAVGVKKQKKPLVGKKAAATKKPAPEKKPA
P36578_405	AAVGVKKQKKPLVGKKAAATKKPAPEKKPAEKKPTTEEKKP
P36578_406	AVGVKKQKKPLVGKKAAATKKPAPEKKPAEKKPTTEEKKPA
P37275_472	GGHSVISAISLPLVDQDGTTKIIINYSLEQPSQLQVVPQNL
P37275_627	SAEELSKIADSVNLPLDVVKKWFEKMQAGQISVQSSEPSSP
P37275_775	VYQNSVYSVQEEPLNLSCAKKEPQKDSCVTDSEPVVNVIPP
P37275_779	SVYSVQEEPLNLSCAKKEPQKDSCVTDSEPVVNVIPPSANP
P37275_833	TIVAIADQNSVPCLRALAANKQTILIPQVAYTYSTTVSPAV
P38398_1264	HSTVATECLSKNTEENLLSLKNSLNDCSNQVILAKASQEHH
P38398_1671	SMVVSGLTPEEFMLVYKFARKHHITLTNLITEETTHVVMKT
P38398_1750	NEHDFEVRGDVVNGRNHQGPKRARESQDRKIFRGLEICCYG
P38398_1793	TNMPTDQLEWMVQLCGASVVKELSSFTLGTGVHPIVVVQPD
P38398_193	PQKTSVYIELGSDSSEDTVNKATYCSVGDQELLQITPQGTR
P38398_251	TDVTNTEHHQPSNNDLNTTEKRAAERHPEKYQGSSVSNLHV
P38398_307	NSSLLLTKDRMNVEKAEFCNKSKQPGLARSQHNRWAGSKET
P38398_325	CNKSKQPGLARSQHNRWAGSKETCNDRRTPSTEKKVDLNAD
P38398_70	KLLNQKKGPSQCPLCKNDITKRSLQESTRFSQLVEELLKII
P38398_719	ELKLTNAPGSFTKCSNTSELKEFVNPSLPREEKEEKLETVK
P38398_793	PGTDYGTQESISLLEVSTLGKAKTEPNKCVSQCAAFENPKG
P38398_800	QESISLLEVSTLGKAKTEPNKCVSQCAAFENPKGLIHGCSK
P38398_812	GKAKTEPNKCVSQCAAFENPKGLIHGCSKDNRNDTEGFKYP
P38432_163	EKVLDLEPKAVTDQTVSKKNKRKNKATCGTVGDDNEEAKRK
P38432_165	VLDLEPKAVTDQTVSKKNKRKNKATCGTVGDDNEEAKRKSP
P38432_263	SPSSSSESESCDESISDGPSKVTLEARNSSEKLPTELSKEE
P38432_306	TKNTTADKLAIKLGFSLTPSKGKTSGTTSSSSDSSAESDDQ
P39023_128	EHISDECKRRFYKNWHKSKKKAFTKYCKKWQDEDGKKQLEK
P39880_1048	SVTSLQDPLQQGCVSSESTPKTSASCSPAPESPMSSSESVK
P39880_117	LGQQLQLKVQRLHDIETENQKLRETLEEYNKEFAEVKNQEV
P39880_1173	ILGLTQGSVSDLLARPKPWHKLSLKGREPFVRMQLWLNDPN
P39880_1202	FVRMQLWLNDPNNVEKLMDMKRMEKKAYMKRRHSSVSDSQP
P39880_1207	LWLNDPNNVEKLMDMKRMEKKAYMKRRHSSVSDSQPCEPPS
P39880_1266	KPRVVLAPEEKEALKRAYQQKPYPSPKTIEDLATQLNLKTS
P39880_127	RLHDIETENQKLRETLEEYNKEFAEVKNQEVTIKALKEKIR
P39880_1356	DSCDGVEATEGPGSADTEEPKSQGEAEREEVPRPAEQTEPP
P39880_143	EEYNKEFAEVKNQEVTIKALKEKIREYEQTLKNQAETIALE
P39880_145	YNKEFAEVKNQEVTIKALKEKIREYEQTLKNQAETIALEKE
P39880_1478	SLFGLPEAAGARDSRDNPLRKKKAANLNSIIHRLEKAASRE
P39880_1479	LFGLPEAAGARDSRDNPLRKKKAANLNSIIHRLEKAASREE
P39880_1480	FGLPEAAGARDSRDNPLRKKKAANLNSIIHRLEKAASREEP
P39880_178	ETIALEKEQKLQNDFAEKERKLQETQMSTTSKLEEAEHKVQ
P39880_339	NSASQISQLEQQLSAKNSTLKQLEEKLKGQADYEEVKKELN
P39880_415	ENAALRISNSDLSGSARRKGKDQPESRRPGSLPAPPPSQLP
P39880_495	TGKFALNSLLQRQLMQSFYSKAMQEAGSTSMIFSTGPYSTN
P39880_69	LRKQVAPLLKSFQGEIDALSKRSKEAEAAFLNVYKRLIDVP
P39880_766	LSTSPMPTVSSYPPLAISLKKPSAAPEAGASALPNPPALKK
P40227_265	NSGFFYKSAEEREKLVKAERKFIEDRVKKIIELKRKVCGDS
P41208_100	GTGKMNFGDFLTVMTQKMSEKDTKEEILKAFKLFDDDETGK
P41229_214	SIPLRQSVQPSKFNSYGRRAKRLQPDPEPTEEDIEKNPELK
P41229_709	ITEAEREAFELLPDDERQCIKCKTTCFLSALACYDCPDGLV
P41229_711	EAEREAFELLPDDERQCIKCKTTCFLSALACYDCPDGLVCL
P41229_776	LPAMLHKLKVRAESFDTWANKVRVALEVEDGRKRSLEELRA
P41229_82	NFRFTPRIQRLNELEAQTRVKLNYLDQIAKFWEIQGSSLKI
P41970_292	EPLNLSSGSKTKSPSLPPKAKKPKGLEISAPPLVLSGTDIG
P41970_37	DQKHEHLICWTSNDGEFKLLKAEEVAKLWGLRKNKTNMNYD
P41970_73	NMNYDKLSRALRYYYDKNIIKKVIGQKFVYKFVSFPEILKM
P42167_144	LVKYGVNPGPIVGTTRKLYEKKLLKLREQGTESRSSTPLPT
P42224_189	EYDFKCKTLQNREHETNGVAKSDQKQEQLLLKKMYLMLDNK
P42224_200	REHETNGVAKSDQKQEQLLLKKMYLMLDNKRKEVVHKIIEL
P42224_201	EHETNGVAKSDQKQEQLLLKKMYLMLDNKRKEVVHKIIELL
P42224_211	DQKQEQLLLKKMYLMLDNKRKEVVHKIIELLNVTELTQNAL
P42224_216	QLLLKKMYLMLDNKRKEVVHKIIELLNVTELTQNALINDEL
P42224_240	LLNVTELTQNALINDELVEWKRRQQSACIGGPPNACLDQLQ
P42224_279	LQNWFTIVAESLQQVRQQLKKLEELEQKYTYEHDPITKNKQ
P42224_298	KKLEELEQKYTYEHDPITKNKQVLWDRTFSLFQQLIQSSFV
P42285_46	DKEKDKGKWKGPPGSADKAGKRFDGKLQSESTNNGKNKRDV
P42285_719	LLRCSKESLKNSATEAAKPAKPDEKGEMQVVPVLVHLLSAI
P42285_748	VVPVLVHLLSAISSVRLYIPKDLRPVDNRQSVLKSIQEVQK
P42285_768	KDLRPVDNRQSVLKSIQEVQKRFPDGIPLLDPIDDMGIQDQ
P42285_833	PNLETVYTLCEKKAQIAIDIKSAKRELKKARTVLQMDELKC
P42285_840	TLCEKKAQIAIDIKSAKRELKKARTVLQMDELKCRKRVLRR
P42285_841	LCEKKAQIAIDIKSAKRELKKARTVLQMDELKCRKRVLRRL
P42285_852	IKSAKRELKKARTVLQMDELKCRKRVLRRLGFATSSDVIEM
P42285_940	EMPKLTEQLAGPLRQMQECAKRIAKVSAEAKLEIDEETYLS
P42568_240	EPSRDHNKSSKESSKKPKENKPLKEEKIVPKMAFKEPKPMS
P42568_261	PLKEEKIVPKMAFKEPKPMSKEPKPDSNLLTITSGQDKKAP
P42568_325	ALFKSFSSAPPLILTCSADKKQIKDKSHVKMGKVKIESETS
P42568_330	FSSAPPLILTCSADKKQIKDKSHVKMGKVKIESETSEKKKS
P42568_482	LHHEPPPPLLKTNNNQILEVKSPIKQSKSDKQIKNGECDKA
P42568_501	VKSPIKQSKSDKQIKNGECDKAYLDELVELHRRLMTLRERH
P42568_552	ETGHFHITNTTFDFDLCSLDKTTVRKLQSYLETSGTSXXXX
P42568_557	HITNTTFDFDLCSLDKTTVRKLQSYLETSGTSXXXXXXXXX
P42696_117	PLSQEPAKKVKAKKKHTNAEKKLADRESALASADLEEEIHQ
P42696_118	LSQEPAKKVKAKKKHTNAEKKLADRESALASADLEEEIHQK
P42696_142	RESALASADLEEEIHQKQGQKRKNSQPGVKVADRKILDDTE
P42696_144	SALASADLEEEIHQKQGQKRKNSQPGVKVADRKILDDTEDT
P42696_151	LEEEIHQKQGQKRKNSQPGVKVADRKILDDTEDTVVSQRKK
P42696_200	RLKNERTVFVGNLPVTCNKKKLKSFFKEYGQIESVRFRSLI
P42696_202	KNERTVFVGNLPVTCNKKKLKSFFKEYGQIESVRFRSLIPA
P42696_206	TVFVGNLPVTCNKKKLKSFFKEYGQIESVRFRSLIPAEGTL
P42696_414	AEGHPKSLFIGEKAVLLKTKKKGQKKSGRPKKQRKQKXXXX
P43243_637	KTESSTEGKEQEEKSGEDGEKDTKDDQTEQEPNMLLESEDE
P43243_701	LANLGDVASDGKKEPSDKAVKKDGSASAAAKKKLKKVDKIE
P43243_702	ANLGDVASDGKKEPSDKAVKKDGSASAAAKKKLKKVDKIEE
P43243_712	KKEPSDKAVKKDGSASAAAKKKLKKVDKIEELDQENEAALE
P43246_490	VKPSFDPNLSELREIMNDLEKKMQSTLISAARDLGLDPGKQ
P43487_79	ASENDLPEWKERGTGDVKLLKHKEKGAIRLLMRRDKTLKIC
P46087_507	CAHLQKELLLSAIDSVNATSKTGGYLVYCTCSITVEENEWV
P46087_63	LSSRARKRAAKRRLGSVEAPKTNKSPEAKPLPGKLPKGISA
P46087_669	KLNGISKGADSELSTVPSVTKTQASSSFQDSSQPAGKAEGI
P46087_735	RQNAPPKGTDTQTPAVLSPSKTQATLKPKDHHQPLGRAKGV
P46087_741	KGTDTQTPAVLSPSKTQATLKPKDHHQPLGRAKGVEKQQLP
P46100_1000	DDKKQSKKGTEEKKKPSDFKKKVIKMEQQYESSSDGTEKLP
P46100_1056	KNGTTDGEKKSKKIRDKTSKKKDELSDYAEKSTGKGDSCDS
P46100_1184	DNKKKKQRTSSKKKAVIVKEKKRNSLRTSTKRKQADITSSS
P46100_1194	SKKKAVIVKEKKRNSLRTSTKRKQADITSSSSSDIEDDDQN
P46100_1305	SSDEDGSSDDEPEEGKKRTGKQNEENPGDEEAKNQVNSESD
P46100_1356	YRHRLLRHKLTVSDGESGEEKKTKPKEHKEVKGRNRRKVSS
P46100_1359	RLLRHKLTVSDGESGEEKKTKPKEHKEVKGRNRRKVSSEDS
P46100_1373	GEEKKTKPKEHKEVKGRNRRKVSSEDSEDSDFQESGVSEEV
P46100_1422	PRTRSAKKAELEENQRSYKQKKKRRRIKVQEDSSSENKSNS
P46100_1479	EEEEEEDENDDSKSPGKGRKKIRKILKDDKLRTETQNALKE
P46100_1482	EEEDENDDSKSPGKGRKKIRKILKDDKLRTETQNALKEEEE
P46100_1485	DENDDSKSPGKGRKKIRKILKDDKLRTETQNALKEEEERRK
P46100_1505	KDDKLRTETQNALKEEEERRKRIAEREREREKLREVIEIED
P46100_1516	ALKEEEERRKRIAEREREREKLREVIEIEDASPTKCPITTK
P46100_1561	EDEETKEPLVQVHRNMVIKLKPHQVDGVQFMWDCCCESVKK
P46100_159	DDFKGPEFRSRSKMKTENLKKRGEDGLHGIVSCTACGQQVN
P46100_198	VNHFQKDSIYRHPSLQVLICKNCFKYYMSDDISRDSDGMDE
P46100_202	QKDSIYRHPSLQVLICKNCFKYYMSDDISRDSDGMDEQCRW
P46100_295	DLVTACNSVFENLEQLLQQNKKKIKVDSEKSNKVYEHTSRF
P46100_297	VTACNSVFENLEQLLQQNKKKIKVDSEKSNKVYEHTSRFSP
P46100_307	LEQLLQQNKKKIKVDSEKSNKVYEHTSRFSPKKTSSNCNGE
P46100_357	GSVTYSYSALIVPKEMIKKAKKLIETTANMNSSYVKFLKQA
P46100_430	EEDLNSEFRAMDAVNKEKNTKEHKVIDAKFETKARKGEKPC
P46100_445	KEKNTKEHKVIDAKFETKARKGEKPCALEKKDISKSEAKLS
P46100_448	NTKEHKVIDAKFETKARKGEKPCALEKKDISKSEAKLSRKQ
P46100_562	VDHQGDGSSGTEQEVESSSVKLNISSKDNRGGIKSKTTAKV
P46100_577	ESSSVKLNISSKDNRGGIKSKTTAKVTKELYVKLTPVSLSN
P46100_626	QEVPQDKDGYKSCGLNPKLEKCGLGQENSDNEHLVENEVSL
P46100_660	VENEVSLLLEESDLRRSPRVKTTPLRRPTETNPVTSNSDEE
P46100_686	RPTETNPVTSNSDEECNETVKEKQKLSVPVRKKDKRNSSDS
P46100_688	TETNPVTSNSDEECNETVKEKQKLSVPVRKKDKRNSSDSAI
P46100_697	SDEECNETVKEKQKLSVPVRKKDKRNSSDSAIDNPKPNKLP
P46100_712	SVPVRKKDKRNSSDSAIDNPKPNKLPKSKQSETVDQNSDSD
P46100_715	VRKKDKRNSSDSAIDNPKPNKLPKSKQSETVDQNSDSDEML
P46100_780	NHKTLYDLKTQAGKDDKGKRKRKSSTSGSDFDTKKGKSAKS
P46100_854	ARTTKKRIPNTKDFDSSEDEKHSKKGMDNQGHKNLKTSQEG
P46100_857	TKKRIPNTKDFDSSEDEKHSKKGMDNQGHKNLKTSQEGSSD
P46100_866	DFDSSEDEKHSKKGMDNQGHKNLKTSQEGSSDDAERKQERE
P46100_897	DDAERKQERETFSSAEGTVDKDTTIMELRDRLPKKQQASAS
P47712_358	VSELMFADWVEFSPYEIGMAKYGTFMAPDLFGSKFFMGTVV
P47712_445	TTKHIVSNDSSDSDDESHEPKGTENEDAGSDYQSDNQASWI
P48552_127	NLNVKKEALLAGMVDSVPKGKQDSTLLASLLQSFSSRLQTV
P48552_193	KDLRCYGVASSHLKTLLKKSKVKDQKPDTNLPDVTKNLIRD
P48552_258	ARLQAVASMVEKRASPATSPKPSVACSQLALLLSSEAHLQQ
P48552_488	LNTWDPKVPDVDIKEDQDTSKNSKLNSHQKVTLLQLLLGHK
P48552_604	CSTQSEKLTNTASNHSMDLTKSKDPPGEKPAQNEGAQNSAT
P48552_606	TQSEKLTNTASNHSMDLTKSKDPPGEKPAQNEGAQNSATFS
P48552_652	QNLAQCGMQSSMSVEEQRPSKQLLTGNTDKPIGMIDRLNSP
P48552_724	ENLLERRTVLQLLLGNPNKGKSEKKEKTPLRDESTQEHSER
P48552_728	ERRTVLQLLLGNPNKGKSEKKEKTPLRDESTQEHSERALSE
P48552_730	RTVLQLLLGNPNKGKSEKKEKTPLRDESTQEHSERALSEQI
P48552_754	RDESTQEHSERALSEQILMVKIKSEPCDDLQIPNTNVHLSH
P48681_259	RAALEQRLEGRWQERLRATEKFQLAVEALEQEKQGLQSQIA
P48681_480	PEDHASLAPPLSPDHSSLEAKDGESGGSRVFSICRGEGEGQ
P48681_507	SRVFSICRGEGEGQIWGLVEKETAIEGKVVSSLQQEIWEEE
P48681_514	RGEGEGQIWGLVEKETAIEGKVVSSLQQEIWEEEDLNRKEI
P48681_532	EGKVVSSLQQEIWEEEDLNRKEIQDSQVPLEKETLKSLGEE
P48681_543	IWEEEDLNRKEIQDSQVPLEKETLKSLGEEIQESLKTLENQ
P48681_587	TLERENQECPRSLEEDLETLKSLEKENKELLKDVEVVRPLE
P48681_608	SLEKENKELLKDVEVVRPLEKEAVGQLKPTGKEDTQTLQSL
P48681_619	DVEVVRPLEKEAVGQLKPTGKEDTQTLQSLQKENQELMKSL
P48681_630	AVGQLKPTGKEDTQTLQSLQKENQELMKSLEGNLETFLFPG
P48681_742	LKTLEEEDQSIVRPLETENHKSLRSLEEQDQETLRTLEKET
P49116_318	EIQPEDQSASEITRAFDTLAKALNTTDSSSSPSLADGIDTS
P49327_776	AVVLEIAPHALLQAVLKRGLKPSCTIIPLMKKDHRDNLEFF
P49368_128	VAEHFLEQQMHPTVVISAYRKALDDMISTLKKISIPVDISD
P49368_163	PVDISDSDMMLNIINSSITTKAISRWSSLACNIALDAVKMV
P49368_191	LACNIALDAVKMVQFEENGRKEIDIKKYARVEKIPGGIIED
P49715_90	PAAFNDEFLADLFQHSRQQEKAKAAVGPTGGGGGGDFDYPG
P49750_1071	LVKQEDFRDKMMGRREDSREKMNRGEGSRDRGLVRPGSSRE
P49750_1386	RDRGELRIREYPERGDTWREKRDYVPDRMDWERERLSDRWY
P49750_1891	LDDYFITEVEKEEKDPDSGKKVKKKVMEYEYEAEMEETYRT
P49750_1978	AEMSADNQTCGKRNIHGRKLKEINKMADHWETAPRHMMRLD
P49750_1982	ADNQTCGKRNIHGRKLKEINKMADHWETAPRHMMRLDIRSL
P49750_2027	AIEEVEMEDFDANIEEQKEEKKDAEEEESELGYIPKSKWEM
P49756_173	GEKKLLVKVDAKTKAQLDEWKAKKKASNGNARPETVTNDDE
P49756_176	KLLVKVDAKTKAQLDEWKAKKKASNGNARPETVTNDDEEAL
P49756_208	VTNDDEEALDEETKRRDQMIKGAIEVLIREYSSELNAPSQE
P49756_236	REYSSELNAPSQESDSHPRKKKKEKKEDIFRRFPVAPLIPY
P49756_297	ISREISKFRDTHKKLEEEKGKKEKERQEIEKERRERERERE
P49756_453	REEDEEDAYERRKLERKLREKEAAYQERLKNWEIRERKKTR
P49756_540	KRLRDREKEMEADERDRKREKEELEEIRQRLLAEGHPDPDA
P49756_614	EEKREEPMEEEEEPEQKPCLKPTLRPISSAPSVSSASGNAT
P49756_665	GIIIPHENSPDQQQPEEHRPKIGLSLKLGASNSPGQPNSVK
P49756_736	DYGEDDKNATKGTVNTEEKRKHIKSLIEKIPTAKPELFAYP
P49790_317	SAQSYGVTSSTARRILQSLEKMSSPLADAKRIPSIVSSPLN
P49790_395	IATNRSVYFKPSLTPSGEFRKTNQRIDNKCSTGYEKNMTPG
P49790_526	QALTNKVQMTSPSSTGSPMFKFSSPIVKSTEANVLPPSSIG
P49848_166	PENPPPAPKEQQKAEATEPLKSAKPGQEEDGPLKGKGQGAT
P50914_141	RIIKNEVKKLQKAALLKASPKKAPGTKGTAAAAAAAAAAKV
P50914_164	PGTKGTAAAAAAAAAAKVPAKKITAASKKAPAQKVPAQKAT
P50914_165	GTKGTAAAAAAAAAAKVPAKKITAASKKAPAQKVPAQKATG
P50914_171	AAAAAAAAAKVPAKKITAASKKAPAQKVPAQKATGQKAAPA
P50914_196	QKVPAQKATGQKAAPAPKAQKGQKAPAQKAPAPKASGKKAX
P50914_199	PAQKATGQKAAPAPKAQKGQKAPAQKAPAPKASGKKAXXXX
P50990_281	TAEELMNFSKGEENLMDAQVKAIADTGANVVVTGGKVADMA
P50990_296	MDAQVKAIADTGANVVVTGGKVADMALHYANKYNIMLVRLN
P51114_207	MHLRSIRTKLMLMSRNEEATKHLECTKQLAAAFHEEFVVRE
P51532_1140	GFKYLRLDGTTKAEDRGMLLKTFNEPGSEYFIFLLSTRAGG
P51532_1375	ERLTCEEEEEKMFGRGSRHRKEVDYSDSLTEKQWLKAIEEG
P51532_1412	IEEGTLEEIEEEVRQKKSSRKRKRDSDAGSSTPTTSTRSRD
P51532_1463	RGRPPAEKLSPNPPNLTKKMKKIVDAVIKYKDSSSGRQLSE
P51532_1464	GRPPAEKLSPNPPNLTKKMKKIVDAVIKYKDSSSGRQLSEV
P51532_1471	LSPNPPNLTKKMKKIVDAVIKYKDSSSGRQLSEVFIQLPSR
P51532_1492	YKDSSSGRQLSEVFIQLPSRKELPEYYELIRKPVDFKKIKE
P51532_1503	EVFIQLPSRKELPEYYELIRKPVDFKKIKERIRNHKYRSLN
P51532_1509	PSRKELPEYYELIRKPVDFKKIKERIRNHKYRSLNDLEKDV
P51532_1511	RKELPEYYELIRKPVDFKKIKERIRNHKYRSLNDLEKDVML
P51532_618	AIGPDGEPLDETSQMSDLPVKVIHVESGKILTGTDAPKAGQ
P51532_687	EEEEEEQPQAAQPPTLPVEEKKKIPDPDSDDVSEVDARHII
P51532_711	PDPDSDDVSEVDARHIIENAKQDVDDEYGVSQALARGLQSY
P51532_744	LARGLQSYYAVAHAVTERVDKQSALMVNGVLKQYQIKGLEW
P51532_755	AHAVTERVDKQSALMVNGVLKQYQIKGLEWLVSLYNNNLNG
P51532_824	GPFLIIVPLSTLSNWAYEFDKWAPSVVKVSYKGSPAARRAF
P51532_831	PLSTLSNWAYEFDKWAPSVVKVSYKGSPAARRAFVPQLRSG
P51610_1989	AHIDYTTKPAIIFRIAARNEKGYGPATQVRWLQETSKDSSG
P51610_2015	TQVRWLQETSKDSSGTKPANKRPMSSPEMKSAPKKSKADGQ
P51610_2028	SGTKPANKRPMSSPEMKSAPKKSKADGQXXXXXXXXXXXXX
P51610_215	VLPPPRESHTAVVYTEKDNKKSKLVIYGGMSGCRLGDLWTL
P51610_217	PPPRESHTAVVYTEKDNKKSKLVIYGGMSGCRLGDLWTLDI
P51610_244	MSGCRLGDLWTLDIDTLTWNKPSLSGVAPLPRSLHSATTIG
P51610_288	YVFGGWVPLVMDDVKVATHEKEWKCTNTLACLNLDTMAWET
P51610_345	HCAVAINTRLYIWSGRDGYRKAWNNQVCCKDLWYLETEKPP
P51814_223	LIKERGYEHKNIEKIIHVTTKLVPSIKRLHNCDTILKHTLN
P51814_258	LKHTLNSHNHNRNSATKNLGKIFGNGNNFPHSPSSTKNENA
P51858_197	GEEKEAATLEVERPLPMEVEKNSTPSEPGSGRGPPQEEEEE
P51858_39	KMKGYPHWPARIDEMPEAAVKSTANKYQVFFFGTHETAFLG
P51858_61	TANKYQVFFFGTHETAFLGPKDLFPYEESKEKFGKPNKRKG
P52732_220	EEITVHNKDEVYQILEKGAAKRTTAATLMNAYSSRSHSVFS
P52732_257	SVFSVTIHMKETTIDGEELVKIGKLNLVDLAGSENIGRSGA
P52732_357	SPASLNLEETLSTLEYAHRAKNILNKPEVNQKLTKKALIKE
P52732_395	IKEYTEEIERLKRDLAAAREKNGVYISEENFRVMSGKLTVQ
P52732_411	AAREKNGVYISEENFRVMSGKLTVQEEQIVELIEKIGAVEE
P52732_457	TELFMDNKNELDQCKSDLQNKTQELETTQKHLQETKLQLVK
P52732_48	FNLAERKASAHSIVECDPVRKEVSVRTGGLADKSSRKTYTF
P52732_491	TKLQLVKEEYITSALESTEEKLHDAASKLLNTVEETTKDVS
P52732_508	TEEKLHDAASKLLNTVEETTKDVSGLHSKLDRKKAVDQHNA
P52732_521	NTVEETTKDVSGLHSKLDRKKAVDQHNAEAQDIFGKNLNSL
P52732_557	NLNSLFNNMEELIKDGSSKQKAMLEVHKTLFGNLLSSSVSA
P52732_564	NMEELIKDGSSKQKAMLEVHKTLFGNLLSSSVSALDTITTV
P52732_60	IVECDPVRKEVSVRTGGLADKSSRKTYTFDMVFGASTKQID
P52732_609	LTSIPENVSTHVSQIFNMILKEQSLAAESKTVLQELINVLK
P52732_649	KTDLLSSLEMILSPTVVSILKINSQLKHIFKTSLTVADKIE
P52732_655	SLEMILSPTVVSILKINSQLKHIFKTSLTVADKIEDQKKEL
P52732_712	NTICSLVESQKQCGNLTEDLKTIKQTHSQELCKLMNLWTER
P52732_764	QKPLSSVQENIQQKSKDIVNKMTFHSQKFCADSDGFSQELR
P52732_771	QENIQQKSKDIVNKMTFHSQKFCADSDGFSQELRNFNQEGT
P52732_792	FCADSDGFSQELRNFNQEGTKLVEESVKHSDKLNGNLEKIS
P52732_799	FSQELRNFNQEGTKLVEESVKHSDKLNGNLEKISQETEQRC
P52732_890	KAAHEKQHNIFLDQMTIDEDKLIAQNLELNETIKIGLTKLN
P52739_146	KENSAPLEENTTGKNEAKKRKIAETSNVITESLPSAESEPV
P52739_242	RQGDRKGQIKEDGCPSDPTSKQVEGIEIVELQLSHVKDLFH
P52739_277	VKDLFHCEKCNRSFKLFYHFKEHMKSHSTESFKCEICNKRY
P52739_57	TLIVDGHHFKAHKAVLAACSKFFYKFFQEFTQEPLVEIEGV
P52741_156	EEQKNFQATLGGCQQKAIHSKRKTHRSTESGDAFHGEQMHY
P52746_128	AGTPLPGQETAEEENVEKEEKSDTQKDSQKAVDKGQGAQRL
P52746_133	PGQETAEEENVEKEEKSDTQKDSQKAVDKGQGAQRLEGDVV
P52746_1349	HCSRCGLLCPSPASLRGHTRKQHPRLECGACQEAFPSRLAL
P52948_1648	SDKHLEALCLFKAEHWNRCHKLIIRHLASDAIINENYDYLK
P52948_1722	MLRHIQQVDCSGNDLEQLHIKVTSLCSRIEQIQCYSAKDRL
P52948_1739	LHIKVTSLCSRIEQIQCYSAKDRLAQSDMAKRVANLLRVVL
P52948_925	KTAPLPPASQTTPLQMALNGKPAPPPQSQSPEVEQLGRVVE
P52948_995	SASTHIASSLGINPHVLQIMKASLLTDEEDVDMALDQRFSR
P53350_480	ESYLTVSSHPNSLMKKITLLKYFRNYMSEHLLKAGANITPR
P53567_53	QLVPAGPGGGGKAVAPSKQSKKSSPMDRNSDEYRQRRERNN
P53567_86	RQRRERNNMAVKKSRLKSKQKAQDTLQRVNQLKEENERLEA
P53999_23	KSKELVSSSSSGSDSDSEVDKKLKRKKQVAPEKPVKKQKTG
P53999_24	SKELVSSSSSGSDSDSEVDKKLKRKKQVAPEKPVKKQKTGE
P53999_26	ELVSSSSSGSDSDSEVDKKLKRKKQVAPEKPVKKQKTGETS
P53999_39	SEVDKKLKRKKQVAPEKPVKKQKTGETSRALSSSKQSSSSR
P54132_1147	QSGIFGKGSAYSRHNAERLFKKLILDKILDEDLYINANDQA
P54132_1153	KGSAYSRHNAERLFKKLILDKILDEDLYINANDQAIAYVML
P54259_251	PPMGPKGGGAASSVGGPNGGKQHPPPTTPISVSSSGASGAP
P54259_274	PPPTTPISVSSSGASGAPPTKPPTTPVGGGNLPSAPPPANF
P54259_348	HLPSPHAMGQGMGGLPPGPEKGPTLAPSPHSLPPASSSAPA
P54274_163	ENDERITPLESALMIWGSIEKEHDKLHEEIQNLIKIQAIAV
P54274_267	VLSEKSSTFLMKAAAKVVESKRTRTITSQDKPSGNDVEMET
P54274_277	MKAAAKVVESKRTRTITSQDKPSGNDVEMETEANLDTRKSV
P54274_349	GTQQQDLNKKERRVGTPQSTKKKKESRRATESRIPVSKSQP
P54274_351	QQQDLNKKERRVGTPQSTKKKKESRRATESRIPVSKSQPVT
P54274_352	QQDLNKKERRVGTPQSTKKKKESRRATESRIPVSKSQPVTP
P55010_28	SVSDQFYRYKMPRLIAKVEGKGNGIKTVIVNMVDVAKALNR
P55036_372	IRNAMGSLASQATKDGKKDKKEEDKKXXXXXXXXXXXXXXX
P55055_330	IMLLETARRYNHETECITFLKDFTYSKDDFHRAGLQVEFIN
P55072_112	LRVRLGDVISIQPCPDVKYGKRIHVLPIDDTVEGITGNLFE
P55072_20	XMASGADSKGDDLSTAILKQKNRPNRLIVDEAINEDNSVVS
P55072_45	RLIVDEAINEDNSVVSLSQPKMDELQLFRGDTVLLKGKKRR
P55081_288	DDENDEEEYEAWKVRELKRIKRDREDREALEKEKAEIERMR
P55081_299	WKVRELKRIKRDREDREALEKEKAEIERMRNLTEEERRAEL
P55081_35	STAGAVPVRNEKGEISMEKVKVKRYVSGKRPDYAPMESSDE
P55197_518	ASPTSSVASAAGSITSSSLQKSPTLLRNGSLQSLSVGSSPV
P55197_762	GMLKSLHQLQVENRRLEEQIKNLTAKKERLQLLNAQLSVPF
P55197_767	LHQLQVENRRLEEQIKNLTAKKERLQLLNAQLSVPFPTITA
P55265_154	SIYQDQEQRILKFLEELGEGKATTAHDLSGKLGTPKKEINR
P55265_326	YLFNVSDSSALNLAKNIGLTKARDINAVLIDMERQGDVYRQ
P55265_502	FYSHGLPRCSPYKKLTECQLKNPISGLLEYAQFASQTCEFN
P61978_103	GPERILSISADIETIGEILKKIIPTLEEGLQLPSPTATSQL
P62241_153	EEEILNKKRSKKIQKKYDERKKNAKISSLLEEQFQQGKLLA
P62241_154	EEILNKKRSKKIQKKYDERKKNAKISSLLEEQFQQGKLLAC
P62241_19	XXMGISRDNWHKRRKTGGKRKPYHKKRKYELGRPAANTKIG
P62241_24	SRDNWHKRRKTGGKRKPYHKKRKYELGRPAANTKIGPRRIH
P62241_98	IIDVVYNASNNELVRTKTLVKNCIVLIDSTPYRQWYESHYA
P62258_80	WRIISSIEQKEENKGGEDKLKMIREYRQMVETELKLICCDI
P62314_41	NGTQVHGTITGVDVSMNTHLKAVKMTLKNREPVQLETLSIR
P62495_118	GTIVTEEGKEKKVNIDFEPFKPINTSLYLCDNKFHTEALTA
P62495_16	XXXXXMADDPSAADRNVEIWKIKKLIKSLEAARGNGTSMIS
P62750_106	AMKKIEDNNTLVFIVDVKANKHQIKQAVKKLYDIDVAKVNT
P62750_37	AKAKALKAKKAVLKGVHSHKKKKIRTSPTFRRPKTLRLRRQ
P62750_63	SPTFRRPKTLRLRRQPKYPRKSAPRRNKLDHYAIIKFPLTT
P62753_188	KPRTKAPKIQRLVTPRVLQHKRRRIALKKQRTKKNKEEAAE
P62753_200	VTPRVLQHKRRRIALKKQRTKKNKEEAAEYAKLLAKRMKEA
P62753_215	KKQRTKKNKEEAAEYAKLLAKRMKEAKEKRQEQIAKRRRLS
P62753_230	AKLLAKRMKEAKEKRQEQIAKRRRLSSLRASTSKSESSQKX
P62753_95	LLLSKGHSCYRPRRTGERKRKSVRGCIVDANLSVLNLVIVK
P78344_158	RLAEDAPNFDGPAAEGQPGQKQSTTFRRLLISKLQDEFENR
P78344_31	SRFSASSGGGGSRGAPQHYPKTAGNSEFLGKTPGQNAQKWI
P78344_332	RKAFLDNGPKTINQIRQDAVKDLGVFIPAPMAQGMRSDFFL
P78344_536	QLGLKTNPPLIQEKPAKTSKKPPPSKEELLKLTETVVTEYL
P78344_584	AVNGVREMRAPKHFLPEMLSKVIILSLDRSDEDKEKASSLI
P78344_71	IPARSTRRDDNSAANNSANEKERHDAIFRKVRGILNKLTPE
P78344_722	QKMLPEIDQNKDRMLEILEGKGLSFLFPLLKLEKELLKQIK
P78344_732	KDRMLEILEGKGLSFLFPLLKLEKELLKQIKLDPSPQTIYK
P78364_228	LAVRNQQASAQGPQMQGSTQKAIPPGASPVSSLSQASSQAL
P78371_176	RQDLMNIAGTTLSSKLLTHHKDHFTKLAVEAVLRLKGSGNL
P78371_276	VRVDSTAKVAEIEHAEKEKMKEKVERILKHGINCFINRQLI
P78371_342	RLALVTGGEIASTFDHPELVKLGSCKLIEEVMIGEDKLIHF
P78371_347	TGGEIASTFDHPELVKLGSCKLIEEVMIGEDKLIHFSGVAL
P80723_102	APKAEPEKTEGAAEAKAEPPKAPEQEQAAPGPAAGGEAPKA
P80723_89	KEGEKDAAAAKEEAPKAEPEKTEGAAEAKAEPPKAPEQEQA
P82970_116	EIVEVKEENIEDATEKGGEKKEAVAAEVKNEEEDQKEDEED
P82970_131	KGGEKKEAVAAEVKNEEEDQKEDEEDQNEEKGEAGKEDKDE
P82970_146	EEEDQKEDEEDQNEEKGEAGKEDKDEKGEEDGKEDKNGNEK
P82970_158	NEEKGEAGKEDKDEKGEEDGKEDKNGNEKGEDAKEKEDGKK
P82970_17	XXXXMPKRKAAGQGDMRQEPKRRSARLSAMLVPVTPEVKPK
P82970_171	EKGEEDGKEDKNGNEKGEDAKEKEDGKKGEDGKGNGEDGKE
P82970_173	GEEDGKEDKNGNEKGEDAKEKEDGKKGEDGKGNGEDGKEKG
P82970_81	QAVAETKQEAVVEEDYNENAKNGEAKITEAPASEKEIVEVK
P82970_86	TKQEAVVEEDYNENAKNGEAKITEAPASEKEIVEVKEENIE
P83731_43	RTDGKVFQFLNAKCESAFLSKRNPRQINWTVLYRRKHKKGQ
Q00613_21	MDLPVGPGAAGPSNVPAFLTKLWTLVSDPDTDALICWSPSG
Q00613_381	PPSPPPTSTPEKCLSVACLDKNELSDHLDAMDSNLDNLQTM
Q00613_463	LSPQEPPRPPEAENSSPDSGKQLVHYTAQPLFLLDPGSVDT
Q00613_524	DGFAEDPTISLLTGSEPPKAKDPTVSXXXXXXXXXXXXXXX
Q01664_114	EYIFSLEQEKTRLLQQNTQLKRFIQELSGSSPKRRRAEDKD
Q01826_198	DLPPEQWSHTTVRNALKDLLKDMNQSSLAKECPLSQSMISS
Q01831_22	ARKRAAGGEPRGRELRSQKSKAKSKARREEEEEDAFEDEKP
Q01831_50	EEEEEDAFEDEKPPKKSLLSKVSQGKRKRGCSHPGGSADGP
Q01831_519	AASSSSSSSKRGKKMCSDGEKAEKRSIAGIDQWLEVFCEQE
Q01831_55	DAFEDEKPPKKSLLSKVSQGKRKRGCSHPGGSADGPAKKKV
Q01831_57	FEDEKPPKKSLLSKVSQGKRKRGCSHPGGSADGPAKKKVAK
Q01831_74	GKRKRGCSHPGGSADGPAKKKVAKVTVKSENLKVIKDEALS
Q01831_77	KRGCSHPGGSADGPAKKKVAKVTVKSENLKVIKDEALSDGD
Q02040_180	ALKESGSEKPSEDVLVKVFEKFGEIRNVDIPMLDPYREEMT
Q02040_238	YVQYREYMGFIQAMSALRGMKLMYKGEDGKAVACNIKVSFD
Q02040_523	PEADGAPKSVNGSVAEEAPCKEVQSSCRVVPEDGSPEKRCP
Q02241_650	ERRVAAKQLEMQNKLWVKDEKLKQLKAIVTEPKTEKPERPS
Q02543_164	QFHDSKIKFPLPHRVLRRQHKPRFTTKRPNTFFXXXXXXXX
Q02543_53	FAPNHVVAKSRFWYFVSQLKKMKKSSGEIVYCGQVFEKSPL
Q02543_55	PNHVVAKSRFWYFVSQLKKMKKSSGEIVYCGQVFEKSPLRV
Q02543_56	NHVVAKSRFWYFVSQLKKMKKSSGEIVYCGQVFEKSPLRVK
Q02878_85	RKAMYKRKYSAAKSKVEKKKKEKVLATVTKPVGGDKNGGTR
Q02880_1008	KFVVKMTEEKLAQAEAAGLHKVFKLQTTLTCNSMVLFDHMG
Q02880_1369	TEPVVIPRDSLLRRAAAERPKYTFDFSEEEDDDADDDDDDN
Q02880_1429	EFVPSDGLDKDEYTFSPGKSKATPEKSLHDKKSQDFGNLFS
Q02880_1439	DEYTFSPGKSKATPEKSLHDKKSQDFGNLFSFPSYSQKSED
Q02880_1463	DFGNLFSFPSYSQKSEDDSAKFDSNEEDSASVFSPSFGLKQ
Q02880_281	TRRAYDLAGSCRGVKVMFNGKKLPVNGFRSYVDLYVKDKLD
Q03111_173	RPSPDYPMLPTIPLSAFSDPKKTKPSHGSKDANKESSKTSK
Q03111_248	DTSRKLGEGRLPKEEKAPPPKAAFKEPKMALKETKLESTSP
Q03112_1090	EEVEDEVLLDEEDEDNDITGKTGKEPVTSNLHEGNPEDDYE
Q03112_1093	EDEVLLDEEDEDNDITGKTGKEPVTSNLHEGNPEDDYEETS
Q03112_1182	ELSSFSTSHVPEELKQPLHRKSKSQAYAMMLSLSDKESLHS
Q03112_1197	QPLHRKSKSQAYAMMLSLSDKESLHSTSHSSSNVWHSMARA
Q03112_149	EFYNVKFCIDASQPDVGSWLKYIRFAGCYDQHNLVACQIND
Q03112_59	PSLNIQEPCSPATSSEAFTPKEGSPYKAPIYIPDDIPIPAE
Q03112_609	SGSDLETTSGSDLESDIESDKEKFKENGKMFKDKVSPLQNL
Q03112_611	SDLETTSGSDLESDIESDKEKFKENGKMFKDKVSPLQNLAS
Q03112_793	LDLSMGSRSRASGTKLTEPRKNHVFGGKKGSNVESRPASDG
Q03188_414	NYRSTKYEMYSKNAEKPSRSKRTIKQKQRRKFMAKPAEEQL
Q03188_424	SKNAEKPSRSKRTIKQKQRRKFMAKPAEEQLDVGQSKDENI
Q03188_428	EKPSRSKRTIKQKQRRKFMAKPAEEQLDVGQSKDENIHTSH
Q03188_476	RNSDRNMEEHEEMGNDCVSKKQMPPVGSKKSSTRKDKEESK
Q03188_484	EHEEMGNDCVSKKQMPPVGSKKSSTRKDKEESKKKRFSSES
Q03188_485	HEEMGNDCVSKKQMPPVGSKKSSTRKDKEESKKKRFSSESK
Q03188_490	NDCVSKKQMPPVGSKKSSTRKDKEESKKKRFSSESKNKLVP
Q03188_492	CVSKKQMPPVGSKKSSTRKDKEESKKKRFSSESKNKLVPEE
Q03188_496	KQMPPVGSKKSSTRKDKEESKKKRFSSESKNKLVPEEVTST
Q03188_76	TKSVPNSTRKIKDTCIQSPSKECQKSHPKSVPVSSKKKEAS
Q03252_351	AEDRIRELEEAMAGERDKFRKMLDAKEQEMTEMRDVMQQQL
Q03468_1182	QAQTEAFWENKQMENNFYKHKSKTKHHSVAEEETLEKHLRP
Q03468_1186	EAFWENKQMENNFYKHKSKTKHHSVAEEETLEKHLRPKQKP
Q03468_1198	FYKHKSKTKHHSVAEEETLEKHLRPKQKPKNSKHCRDAKFE
Q03468_1205	TKHHSVAEEETLEKHLRPKQKPKNSKHCRDAKFEGTRIPHL
Q03468_1210	VAEEETLEKHLRPKQKPKNSKHCRDAKFEGTRIPHLVKKRR
Q03468_1216	LEKHLRPKQKPKNSKHCRDAKFEGTRIPHLVKKRRYQKQDS
Q03468_1227	KNSKHCRDAKFEGTRIPHLVKKRRYQKQDSENKSEAKEQSN
Q03468_1239	GTRIPHLVKKRRYQKQDSENKSEAKEQSNDDYVLEKLFKKS
Q03468_1257	ENKSEAKEQSNDDYVLEKLFKKSVGVHSVMKHDAIMDGASP
Q03468_1258	NKSEAKEQSNDDYVLEKLFKKSVGVHSVMKHDAIMDGASPD
Q03468_1295	ASPDYVLVEAEANRVAQDALKALRLSRQRCLGAVSGVPTWT
Q03468_1352	GKKRNSNFSVQHPSSTSPTEKCQDGIMKKEGKDNVPEHFSG
Q03468_1363	HPSSTSPTEKCQDGIMKKEGKDNVPEHFSGRAEDADSSSGP
Q03468_1457	FQAHTDGQASTREILQEFESKLSASQSCVFRELLRNLCTFH
Q03468_152	EYRSVLDDLTSCTTSLRQINKIIEQLSPQAATSRDINRKLD
Q03468_187	INRKLDSVKRQKYNKEQQLKKITAKQKHLQAILGGAEVKIE
Q03468_316	RKAPAPVTPPAPVQNKNKPNKKARVLSKKEERLKKHIKKLQ
Q03468_333	KPNKKARVLSKKEERLKKHIKKLQKRALQFQGKVGLPKARR
Q03468_337	KARVLSKKEERLKKHIKKLQKRALQFQGKVGLPKARRPWES
Q03468_415	LSGDGTDYELKPLPKGGKRQKKVPVQEIDDDFFPSSGEEAE
Q03468_751	ACVLRDTINPYLLRRMKSDVKMSLSLPDKNEQVLFCRLTDE
Q03468_759	NPYLLRRMKSDVKMSLSLPDKNEQVLFCRLTDEQHKVYQNF
Q03468_849	EDQFGYWKRSGKMIVVESLLKIWHKQGQRVLLFSQSRQMLD
Q03933_479	ASSVEQASTTASSEVLSSVDKPIEVDELLDSSLDPEPTQSK
Q03933_54	QSFLVLDEQRFAKEILPKYFKHNNMASFVRQLNMYGFRKVV
Q05519_217	KLNHVAAGLVSPSLKSDTSSKEIEEAMKRVREAQSLISAAI
Q05519_224	GLVSPSLKSDTSSKEIEEAMKRVREAQSLISAAIEPDKKEE
Q05519_241	EAMKRVREAQSLISAAIEPDKKEEKRRHSRSRSRSRRRRTP
Q05519_242	AMKRVREAQSLISAAIEPDKKEEKRRHSRSRSRSRRRRTPS
Q05519_379	RSPKRKLSRSPSPRRHKKEKKKDKDKERSRDERERSTSKKK
Q05519_382	KRKLSRSPSPRRHKKEKKKDKDKERSRDERERSTSKKKKSK
Q05519_443	RDYDEEEQGYDSEKEKKEEKKPIETGSPKTKECSVEKGTGD
Q05519_453	DSEKEKKEEKKPIETGSPKTKECSVEKGTGDSLRESKVNGD
Q05519_459	KEEKKPIETGSPKTKECSVEKGTGDSLRESKVNGDDHHEED
Q05519_469	SPKTKECSVEKGTGDSLRESKVNGDDHHEEDMDMSDXXXXX
Q05519_82	LRLFPPDDSPLPVSSRVCFVKFHDPDSAVVAQHLTNTVFVD
Q05682_395	AEEEEKAKVEEQKRNKQLEEKKHAMQETKIKGEKVEQKIEG
Q05682_460	KGTKVQAKREKLQEDKPTFKKEEIKDEKIKKDKEPKEEVKS
Q05682_467	KREKLQEDKPTFKKEEIKDEKIKKDKEPKEEVKSFMDRKKG
Q05682_469	EKLQEDKPTFKKEEIKDEKIKKDKEPKEEVKSFMDRKKGFT
Q05682_472	QEDKPTFKKEEIKDEKIKKDKEPKEEVKSFMDRKKGFTEVK
Q05682_492	KEPKEEVKSFMDRKKGFTEVKSQNGEFMTHKLKHTENTFSR
Q05682_504	RKKGFTEVKSQNGEFMTHKLKHTENTFSRPGGRASVDTKEA
Q06730_164	CGMSFNTVSELVISKINYLGKKSDEFNACGKLLLNIKHDET
Q06730_298	DCEKFLCVKSTLSKPHGVSMKHYDCGESGNNFRRKLCLSHL
Q06830_27	KIGHPAPNFKATAVMPDGQFKDISLSDYKGKYVVFFFYPLD
Q06830_37	ATAVMPDGQFKDISLSDYKGKYVVFFFYPLDFTFVCPTEII
Q06830_92	QVIGASVDSHFCHLAWVNTPKKQGGLGPMNIPLVSDPKRTI
Q07020_30	DRKVRRKEPKSQDIYLRLLVKLYRFLARRTNSTFNQVVLKR
Q07020_49	VKLYRFLARRTNSTFNQVVLKRLFMSRTNRPPLSLSRMIRK
Q07020_71	LFMSRTNRPPLSLSRMIRKMKLPGRENKTAVVVGTITDDVR
Q07666_165	YLDLFSHKNMKLKERVLIPVKQYPKFNFVGKILGPQGNTIK
Q07666_214	KISVLGKGSMRDKAKEEELRKGGDPKYAHLNMDLHVFIEVF
Q08050_415	VKVPLPLAASLMSSELARHSKRVRIAPKVLLAEEGIAPLSS
Q08050_514	FKEESSHSWEDSSQSPTPRPKKSYSGLRSPTRCVSEMLVIQ
Q08050_631	TPSKSVLPRTPESWRLTPPAKVGGLDFSPVQTSQGASDPLP
Q08050_94	QVVAIPNNANIHSIITALTAKGKESGSSGPNKFILISCGGA
Q08050_96	VAIPNNANIHSIITALTAKGKESGSSGPNKFILISCGGAPT
Q08211_1007	NLDVVISLLAFGVYPNVCYHKEKRKILTTEGRNALIHKSSV
Q08211_1048	NCPFSSQDMKYPSPFFVFGEKIRTRAISAKGMTLVTPLQLL
Q08211_1074	ISAKGMTLVTPLQLLLFASKKVQSDGQIVLVDDWIKLQISH
Q08211_1116	AAACITGLRAAMEALVVEVTKQPAIISQLDPVNERMLNMIR
Q08211_16	XXXXXMGDVKNFLYAWCGKRKMTPSYEIRAVGNKNRQKFMC
Q08211_191	GLHGNWTLENAKARLNQYFQKEKIQGEYKYTQVGPDHNRSF
Q08211_199	ENAKARLNQYFQKEKIQGEYKYTQVGPDHNRSFIAEMTIYI
Q08211_220	YTQVGPDHNRSFIAEMTIYIKQLGRRIFAREHGSNKKLAAQ
Q08211_265	SLVRQLYHLGVVEAYSGLTKKKEGETVEPYKVNLSQDLEHQ
Q08211_266	LVRQLYHLGVVEAYSGLTKKKEGETVEPYKVNLSQDLEHQL
Q08211_29	YAWCGKRKMTPSYEIRAVGNKNRQKFMCEVQVEGYNYTGMG
Q08211_33	GKRKMTPSYEIRAVGNKNRQKFMCEVQVEGYNYTGMGNSTN
Q08211_391	QLEQDHDLQAILQERELLPVKKFESEILEAISQNSVVIIRG
Q08211_417	ILEAISQNSVVIIRGATGCGKTTQVPQFILDDFIQNDRAAE
Q08211_54	FMCEVQVEGYNYTGMGNSTNKKDAQSNAARDFVNYLVRINE
Q08211_733	TNIAETSITINDVVYVIDSCKQKVKLFTAHNNMTNYATVWA
Q08211_819	HEIALSIKLLRLGGIGQFLAKAIEPPPLDAVIEAEHTLREL
Q08211_898	DAICTIAAATCFPEPFINEGKRLGYIHRNFAGNRFSDHVAL
Q08211_943	QAWDDARMGGEEAEIRFCEHKRLNMATLRMTWEAKVQLKEI
Q08211_957	IRFCEHKRLNMATLRMTWEAKVQLKEILINSGFPEDCLLTQ
Q08211_961	EHKRLNMATLRMTWEAKVQLKEILINSGFPEDCLLTQVFTN
Q08945_421	YTFSSIEREEYGKLFDFVNAKKLNIKNRGLKEGMNPSYDEY
Q08945_461	YADSDEDQHDAYLERMKEEGKIREENANDSSDDSGEETDES
Q08945_516	DSNASASSSSNEGDSDRDEKKRKQLKKAKMAKDRKSRKKPV
Q08945_518	NASASSSSNEGDSDRDEKKRKQLKKAKMAKDRKSRKKPVEV
Q08945_522	SSSSNEGDSDRDEKKRKQLKKAKMAKDRKSRKKPVEVKKGK
Q08945_527	EGDSDRDEKKRKQLKKAKMAKDRKSRKKPVEVKKGKDPNAP
Q08945_540	LKKAKMAKDRKSRKKPVEVKKGKDPNAPKRPMSAYMLWLNA
Q08945_548	DRKSRKKPVEVKKGKDPNAPKRPMSAYMLWLNASREKIKSD
Q08945_592	ISITDLSKKAGEIWKGMSKEKKEEWDRKAEDARRDYEKAMK
Q08945_593	SITDLSKKAGEIWKGMSKEKKEEWDRKAEDARRDYEKAMKE
Q08945_612	KKEEWDRKAEDARRDYEKAMKEYEGGRGESSKRDKSKKKKK
Q08945_623	ARRDYEKAMKEYEGGRGESSKRDKSKKKKKVKVKMEKKSTP
Q08945_626	DYEKAMKEYEGGRGESSKRDKSKKKKKVKVKMEKKSTPSRG
Q08945_628	EKAMKEYEGGRGESSKRDKSKKKKKVKVKMEKKSTPSRGSS
Q08945_629	KAMKEYEGGRGESSKRDKSKKKKKVKVKMEKKSTPSRGSSS
Q08945_632	KEYEGGRGESSKRDKSKKKKKVKVKMEKKSTPSRGSSSKSS
Q08945_634	YEGGRGESSKRDKSKKKKKVKVKMEKKSTPSRGSSSKSSSR
Q08945_663	PSRGSSSKSSSRQLSESFKSKEFVSSDESSSGENKSKKKRR
Q08945_67	ELTEGIWRRVALGHGLKLLTKNGHVYKYDGFRESEFEKLSD
Q08945_680	FKSKEFVSSDESSSGENKSKKKRRRSEDSEEEELASTPPSS
Q08945_73	WRRVALGHGLKLLTKNGHVYKYDGFRESEFEKLSDFFKTHY
Q08945_84	LLTKNGHVYKYDGFRESEFEKLSDFFKTHYRLELMEKDLCV
Q08AF3_179	QGSVQYEGNINVSAAALFDRKRLQYLEKLNLPESTHVEFVM
Q08AF3_186	GNINVSAAALFDRKRLQYLEKLNLPESTHVEFVMFSTDVSH
Q08AF3_286	HFCTQRPEIKYVLNFLEVHDKGALRGYVCAIKVEKFCCAVF
Q08AF3_297	VLNFLEVHDKGALRGYVCAIKVEKFCCAVFAKVPSSWQVKD
Q08AF3_375	TPRSKPVCIHKNSECLKEQQKRYFPVFSDRVVYTPESLYKE
Q08AF3_38	AGKVTLGTQQRQEMDPRLREKQNEIILRAVCALLNSGGGII
Q08AF3_804	GYSPKDIAVLFTKASEVEKYKDRLLTAMRKRKLSQLHEESD
Q08AF3_813	LFTKASEVEKYKDRLLTAMRKRKLSQLHEESDLLLQIGDAS
Q08J23_429	CLRILPHHQNTGGFFVAVLVKKSSMPWNKRQPKLQGKSAET
Q08J23_509	EDLENNGSKKDGVCGPPPSKKMKLFGFKEDPFVFIPEDDPL
Q09161_381	QLPAPPHIDVMYTTLLIELCKLQPGSLPQVLAQATEMLYMR
Q09161_41	TSDANETEDHLESLICKVGEKSACSLESNLEGLAGVLEADL
Q0JRZ9_214	KMTETAQKFQDIEETHLIHIKEIIGSLSNAIKEIHLQIGQV
Q0JRZ9_262	MANTTVESLIQKFAESKGTGKERPGLIEFEECDTASAVEGI
Q0JRZ9_283	ERPGLIEFEECDTASAVEGIKPRKRKTFALPGIIKKEKDAE
Q0JRZ9_678	KYQVSSNGIQSTPLNLATYWKCSASTTDLRVDYKYNPEAMV
Q12772_402	QVNHKLRQENMVLKLANQKNKLLKGIDLGSLVDNEVDLKIE
Q12772_823	FCKNLLERAIESLVKPQAKKKAGDQEEESCEFSSALEYLKL
Q12772_842	KKAGDQEEESCEFSSALEYLKLLHSFVDSVGVMSPPLSRSS
Q12772_865	HSFVDSVGVMSPPLSRSSVLKSALGPDIICRWWTSAITVAI
Q12772_989	HVVQLLTCDLLLSLRTALWQKQASASQAVGETYHASGAELA
Q12788_105	SRALLLAQWAWQEGSVTRLWKAIHTAPVATMAFDPTSTLLA
Q12788_256	FESVEAAVLLPEEPVSQLGVKSPGLYFLTAGDQGTLRVWEA
Q12789_1629	DGSLEDDEDEEDDLDEGVGGKRRSMEVKPAQASHTNYLLMR
Q12789_2105	PTLDCTLRLGRVFPHEVNWNKWIHLXXXXXXXXXXXXXXXX
Q12789_323	AKVVSLRLQEIHPECGPCKTKKGTDVMVRCLKLLKEFKRND
Q12789_686	LSEEGLLRLYRTTVIQDGIKKKVDLVVHPSMDQNDPLVRSA
Q12789_926	SDILLCLPLSIFIQIVQVSYKVDNLEEFLNDPLKKHTLIRF
Q12888_1074	PTTPIRGNLLHFPSSQGEEEKEKLEGDHTIRQSQQPMKPIS
Q12888_1106	SQQPMKPISPVKDPVSPASQKMVIQGPSSPQGEAMVTDVLE
Q12888_1390	TGTPVCEEDGDAGLGIRQGGKAPVTPRGRGRRGRPPSRTTG
Q12888_1681	MGVLSGKRKLITSEEERSPAKRGRKSATVKPGAVGAGEFVS
Q12888_1744	LNKTLFLGYAFLLTMATTSDKLASRSKLPDGPTGSSEEEEE
Q12888_1814	AQCNTAYQCLLIADQHCRTRKYFLCLASGIPCVSHVWVHDS
Q12888_192	VLELSQSQDVEENTVPYEVDKEQLQSVTTNSGYTRLSDVDA
Q12888_910	HASQSFCESSSETPFHFTLPKEGDIIPPLTGATPPLIGHLK
Q12905_109	IVAPGTFEVQIEEVRQVGSYKKGTMTTGHNVADLVVILKIL
Q12906_297	ECLASGIVMPDGSGIYDPCEKEATDAIGHLDRQQREDITQS
Q12906_526	SAAFPSDATAEQGPILTKHGKNPVMELNEKRRGLKYELISE
Q12906_540	ILTKHGKNPVMELNEKRRGLKYELISETGGSHDKRFVMEVE
Q12906_553	NEKRRGLKYELISETGGSHDKRFVMEVEVDGQKFQGAGSNK
Q12906_775	QQQSYNQSPYSNYGPPQGKQKGYNHGQGSYSYSNSYNSPGG
Q13029_393	QGLERHMHIHISTVNHAFKCKYCGKAFGTQINRRRHERRHE
Q13029_573	VYIMDISSNISENLNYYIDGKIQTNNNTSNCDVIEMESASA
Q13029_700	HKEKSVYLSSKLKQLLQTQDKLTPAGISATEIAKLGPVCVS
Q13029_804	WSLSGRDERETVSPPCFDEYKMSKEWTASSAFSSVCNQQPL
Q13029_807	SGRDERETVSPPCFDEYKMSKEWTASSAFSSVCNQQPLDLS
Q13111_323	PKQHSSTSPFPTSTPLRRITKKFVKGSTEKNKLRLQRDQER
Q13111_349	STEKNKLRLQRDQERLGKQLKLRAEREEKEKLKEEAKRAKE
Q13111_357	LQRDQERLGKQLKLRAEREEKEKLKEEAKRAKEEAKKKKEE
Q13111_392	KKKKEEEKELKEKERREKREKDEKEKAEKQRLKEERRKERQ
Q13111_453	EEEKRIKAEKAEITRFFQKPKTPQAPKTLAGSCGKFAPFEI
Q13111_799	TYLHTPTPSEDAAIPSKSRLKRLISENSVYEKRPDFRMCWY
Q13111_810	AAIPSKSRLKRLISENSVYEKRPDFRMCWYVHPQVLQSFQQ
Q13111_885	TPISLKRKSAGSMCITQFMKKRRHDGQIGAEDMDGFQADTE
Q13111_90	ASLDTLENNCHVGSDIDFRPKLVNGKGPLDNFLRNRIETSI
Q13111_945	VQAPCGAASGAGGGVGVDTGKATLTASPLGASXXXXXXXXX
Q13129_518	EMSINDTDVLESFLSDYDEGKEDKQYRRRDLTDQHKEKRDK
Q13129_618	VPHVMEHVKMPPSRRDRSKKKLLLKGSQKGICPKSPSAIPE
Q13129_715	EHQNNDENAKHYLDMKNRREKCTYCRRHFMSAFHLREHEQV
Q13206_179	EVLRKVGKNHDFSAGLIIGGKDLKHEAERINNINILVCTPG
Q13206_24	TANSPGSGARPDPVRSFNRWKKKHSHRQNKKKQLRKQLKKP
Q13206_33	RPDPVRSFNRWKKKHSHRQNKKKQLRKQLKKPEWQVERESI
Q13206_410	FDCPEDANTYIHRAGRTARYKEDGEALLILLPSEKAMVQQL
Q13206_424	GRTARYKEDGEALLILLPSEKAMVQQLLQKKVPVKEIKINP
Q13206_43	WKKKHSHRQNKKKQLRKQLKKPEWQVERESISRLMQNYEKI
Q13206_434	EALLILLPSEKAMVQQLLQKKVPVKEIKINPEKLIDVQKKL
Q13206_446	MVQQLLQKKVPVKEIKINPEKLIDVQKKLESILAQDQDLKE
Q13206_452	QKKVPVKEIKINPEKLIDVQKKLESILAQDQDLKERAQRCF
Q13206_453	KKVPVKEIKINPEKLIDVQKKLESILAQDQDLKERAQRCFV
Q13206_465	EKLIDVQKKLESILAQDQDLKERAQRCFVSYVRSVYLMKDK
Q13206_483	DLKERAQRCFVSYVRSVYLMKDKEVFDVSKLPIPEYALSLG
Q13206_485	KERAQRCFVSYVRSVYLMKDKEVFDVSKLPIPEYALSLGLA
Q13206_492	FVSYVRSVYLMKDKEVFDVSKLPIPEYALSLGLAVAPRVRF
Q13206_515	IPEYALSLGLAVAPRVRFLQKMQKQPTKELVRSQADKVIEP
Q13206_518	YALSLGLAVAPRVRFLQKMQKQPTKELVRSQADKVIEPRAP
Q13206_675	QKKEPSKSSIKKKMTKVAEAKKVMKRNFKVNKKITFTDEGE
Q13206_745	AKERLQEEDKFDKEEYRKKIKAKHREKRLKEREARREANKR
Q13206_754	KFDKEEYRKKIKAKHREKRLKEREARREANKRQAKAKDEEE
Q13206_764	IKAKHREKRLKEREARREANKRQAKAKDEEEAFLDWSDDDD
Q13206_79	NYEKINVNEITRFSDFPLSKKTLKGLQEAQYRLVTEIQKQT
Q13206_800	SDDDDDDDDGFDPSTLPDPDKYRSSEDSDSEDMENKISDTK
Q13206_815	LPDPDKYRSSEDSDSEDMENKISDTKKKQGMKKRSNSEVED
Q13206_82	KINVNEITRFSDFPLSKKTLKGLQEAQYRLVTEIQKQTIGL
Q13283_36	VRQYYTLLNQAPDMLHRFYGKNSSYVHGGLDSNGKPADAVY
Q13283_393	SGGKLPNFGFVVFDDSEPVQKVLSNRPIMFRGEVRLNVEEK
Q13283_413	KVLSNRPIMFRGEVRLNVEEKKTRAAREGDRRDNRLRGPGG
Q13283_414	VLSNRPIMFRGEVRLNVEEKKTRAAREGDRRDNRLRGPGGP
Q13283_50	LHRFYGKNSSYVHGGLDSNGKPADAVYGQKEIHRKVMSQNF
Q13310_113	LRKSGVGNVFIKNLDKSIDNKALYDTFSAFGNILSCKVVCD
Q13310_196	RKEREAELGAKAKEFTNVYIKNFGEEVDDESLKELFSQFGK
Q13310_208	KEFTNVYIKNFGEEVDDESLKELFSQFGKTLSVKVMRDPNG
Q13310_568	VQGQEPLTASMLAAAPPQEQKQMLGERLFPLIQTMHSNLAG
Q13310_635	KVDEAVAVLQAHHAKKEAAQKVGAVAAATSXXXXXXXXXXX
Q13330_267	RDITLFHAMDTLHKNIYDISKAISALVPQGGPVLCRDEMEE
Q13330_373	QVYIPNYNKPNPNQISVNNVKAGVVNGTGAPGQSPGAGRAC
Q13330_670	WIDAPDDVFYMATEETRKIRKLLSSSETKRAARRPYKPIAL
Q13427_427	TDHRNVSESPNRKNEKEKKVKDHKSNSKERDIRRNSEKDDK
Q13428_1340	TELLEQERKKVVDTTKESSRKGWESRKRKLSGDQPAARTPR
Q13428_1362	WESRKRKLSGDQPAARTPRSKKKKKLGAGEGGEASVSPEKT
Q13428_1394	EASVSPEKTSTTSKGKAKRDKASGDVKEKKGKGSLGSQGAK
Q13428_215	QADSSSEDTSSSSDETDVEGKPSVKPAQVKASSVSTKESPA
Q13428_219	SSEDTSSSSDETDVEGKPSVKPAQVKASSVSTKESPARKAA
Q13428_237	SVKPAQVKASSVSTKESPARKAAPAPGKVGDVTPQVKGGAL
Q13428_244	KASSVSTKESPARKAAPAPGKVGDVTPQVKGGALPPAKRAK
Q13428_405	GAAPAPPGKTGPAVAKAQAGKREEDSQSSSEESDSEEEAPA
Q13428_458	AASAPAKESPRKGAAPAPPRKTGPAAAQVQVGKQEEDSRSS
Q13428_498	SSEESDSDREALAAMNAAQVKPLGKSPQVKPASTMGMGPLG
Q13428_62	QPVTLLDIYTHWQQTSELGRKRKAEEDAALQAKKTRVSDPI
Q13428_986	RSPAGPAATPAQAQAASTPRKARASESTARSSSSESEDEDV
Q13435_148	GPPPPLRVGEPVALSEEERLKLAQQQAALLMQQEERAKQQG
Q13435_165	ERLKLAQQQAALLMQQEERAKQQGDHSLKEHELLEQQKRAA
Q13435_173	QAALLMQQEERAKQQGDHSLKEHELLEQQKRAAVLLEQERQ
Q13435_182	ERAKQQGDHSLKEHELLEQQKRAAVLLEQERQQEIAKMGTP
Q13435_268	GPPPPPGDENREMDDPSVGPKIPQALEKILQLKESRQEEMN
Q13435_403	FIFFKRIFEAFKLTDDVKKEKEKEPEKLDKLENSAAPKKKG
Q13435_507	LLVHLKATRNSVPVPRHWCFKRKYLQGKRGIEKPPFELPDF
Q13435_604	LTIHGDLYYEGKEFETRLKEKKPGDLSDELRISLGMPVGPN
Q13435_627	GDLSDELRISLGMPVGPNAHKVPPPWLIAMQRYGPPPSYPN
Q13435_649	PPPWLIAMQRYGPPPSYPNLKIPGLNSPIPESCSFGYHAGG
Q13435_731	LEPSDEESSEEEEEEESDEDKPDETGFITPADSGLITPGGF
Q13435_77	YTRQTGIVLNRPVLRGEDGDKAAPPPMSAQLPGIPMPPPPL
Q13442_126	ELSRREREEIEKQKAKERYMKMHLAGKTEQAKADLARLAII
Q13442_137	KQKAKERYMKMHLAGKTEQAKADLARLAIIRKQREEAARKK
Q13442_156	AKADLARLAIIRKQREEAARKKEEERKAKDDATLSGKRMQS
Q13485_519	CILRMSFVKGWGPDYPRQSIKETPCWIEIHLHRALQLLDEV
Q13492_149	RYLNEKAVSYRQVAFDFTKVKRGADGVMRTMNTEKLLKTVP
Q13492_163	FDFTKVKRGADGVMRTMNTEKLLKTVPIIQNQMDALLDFNV
Q13492_534	LKPTVASQNQNLPVAKLPPSKLVSDDLDSSLANLVGNLGIG
Q13492_77	PQLADSLFERTTNSSWVVVFKSLITTHHLMVYGNERFIQYL
Q13501_100	DEELTMAMSYVKDDIFRIYIKEKKECRRDHRPPCAQEAPRN
Q13501_102	ELTMAMSYVKDDIFRIYIKEKKECRRDHRPPCAQEAPRNMV
Q13501_103	LTMAMSYVKDDIFRIYIKEKKECRRDHRPPCAQEAPRNMVH
Q13501_157	GTRYKCSVCPDYDLCSVCEGKGLHRGHTKLAFPSPFGHLSE
Q13501_187	AFPSPFGHLSEGFSHSRWLRKVKHGHFGWPGWEMGPPGNWS
Q13501_189	PSPFGHLSEGFSHSRWLRKVKHGHFGWPGWEMGPPGNWSPR
Q13506_264	HKEEEIRKYSAIYGRFDSKRKDGKHLTLHELTVNEAAAQLC
Q13506_286	GKHLTLHELTVNEAAAQLCVKDNALLTRRDELFALARQISR
Q13506_318	FALARQISREVTYKYTYRTTKSKCGERDELSPKRIKVEDGF
Q13506_320	LARQISREVTYKYTYRTTKSKCGERDELSPKRIKVEDGFPD
Q13506_61	LCEAGEEEFLEIMALVGMASKPLHVRRLQKALRDWVTNPGL
Q13523_209	KERTRHRSDKKKSKGGIEIVKEKTTRSKSKERKKSKSPSKR
Q13523_211	RTRHRSDKKKSKGGIEIVKEKTTRSKSKERKKSKSPSKRSK
Q13523_221	SKGGIEIVKEKTTRSKSKERKKSKSPSKRSKSQDQARKSKS
Q13523_224	GIEIVKEKTTRSKSKERKKSKSPSKRSKSQDQARKSKSPTL
Q13523_323	KDRRSRSKERKSKRSETDKEKKPIKSPSKDASSGKENRSPS
Q13523_327	SRSKERKSKRSETDKEKKPIKSPSKDASSGKENRSPSRRPG
Q13523_737	KIIRNNELMQKTGLKELEFLKKLNDADPDDKFHCLRLFRHF
Q13523_760	NDADPDDKFHCLRLFRHFYHKQHLCLVFEPLSMNLREVLKK
Q13523_779	HKQHLCLVFEPLSMNLREVLKKYGKDVGLHIKAVRSYSQQL
Q13523_807	LHIKAVRSYSQQLFLALKLLKRCNILHADIKPDNILVNESK
Q13523_953	EVDKVTEREKVTVMSTINPTKDLLADLIGCQRLPEDQRKKV
Q13573_108	IQVDSEGKIKYDAIARQGQSKDKVIYSKYTDLVPKEVMNAD
Q13642_91	CLHPLANETFVAKDNKILCNKCTTREDSPKCKGCFKAIVAG
Q13765_82	EPVSKAKQSRSEKKARKAMSKLGLRQVTGVTRVTIRKSKNI
Q13769_214	ELEQRKRLAEKYRECLSNKEKILKEIEVKKEYLSSLQPRLN
Q13769_35	RSDGAPAEGKRNRSDTEQEGKYYSEEAEVDLRDPGRDYELY
Q13769_355	DKRKEMLKRHPLSVMLDLKCKDDSVLHLTFYYLMNLNIMTV
Q13769_378	SVLHLTFYYLMNLNIMTVKAKVTTAMELITPISAGDLLSPD
Q13769_412	GDLLSPDSVLSCLYPGDHGKKTPNPANQYQFDKVGILTLSD
Q13769_446	GILTLSDYVLELGHPYLWVQKLGGLHFPKEQPQQTVIADHS
Q13769_480	TVIADHSLSASHMETTMKLLKTRVQSRLALHKQFASLEHGI
Q13769_73	ELYKYTCQELQRLMAEIQDLKSRGGKDVAIEIEERRIQSCV
Q14004_1045	RRRQKQMGMTDDVSTIKAPRKDLSLGLDDSRTNTPQGVLPS
Q14004_1069	LGLDDSRTNTPQGVLPSSQLKSQGSSNVAPVKTGPGQHLNH
Q14004_27	TALGGGGGLSWAEKKLEERRKRRRFLSPQQPPLLLPLLQPQ
Q14004_308	EPPSAYKEPPKAYREDKTEPKAYRRRRSLSPLGGRDDSPVS
Q14004_339	LGGRDDSPVSHRASQSLRSRKSPSPAGGGSSPYSRRLPRSP
Q14004_472	ELNKNKKARAAEAARAAEAAKAAEATKAAEAAAKAAKASNT
Q14191_577	IHSVLEERRDNVAVMATGYGKSLCFQYPPVYVGKIGLVISP
Q14192_235	DLYAKKCAGCTNPISGLGGTKYISFEERQWHNDCFNCKKCS
Q14192_83	EACFHCSQCRNSLVDKPFAAKEDQLLCTDCYSNEYSSKCQE
Q14202_1086	YGVNAWKCWVQSKYANGETSKGDELRFGPKPMRIKEDILAC
Q14202_1095	VQSKYANGETSKGDELRFGPKPMRIKEDILACSAAELNYGL
Q14202_1170	NRMVNIFTDLYYLTFVQELNKSLSTWQPTLLPNNTVFSRVE
Q14202_645	RLRGVVSQCEHCRQEKLLHEKLRFSGVEKSFCSEGCVLLYK
Q14202_665	KLRFSGVEKSFCSEGCVLLYKQDFTKKLGLCCITCTYCSQT
Q14202_670	GVEKSFCSEGCVLLYKQDFTKKLGLCCITCTYCSQTCQRGV
Q14202_671	VEKSFCSEGCVLLYKQDFTKKLGLCCITCTYCSQTCQRGVT
Q14202_947	PLEADILAMAEMIAEAEELDKASSDLCDLVSNQSAEGLLED
Q14207_1000	RSIPQFPVPPKSQKAQGLRNKPCIGKQVNNLVDSSGHSVGC
Q14207_1038	VGCHAQKTEVSDKSIATDLGKKSEETTVPFPEESIVPAAKP
Q14207_1088	STTAPVANTQGPNHKMVSQNKERNAVSFPNLDSPNVSSTLK
Q14207_1162	RETQSEKKVSPTEIVLESFHKATANKENELCSDVERQKNPE
Q14207_1167	EKKVSPTEIVLESFHKATANKENELCSDVERQKNPENSKLS
Q14207_1179	SFHKATANKENELCSDVERQKNPENSKLSIGQQNGGLRSEK
Q14207_1369	ATPLKDNTQQFRASSRSTTKKRKIEELDERERNSRPSSKNL
Q14207_341	SDPAFQALFDLFDYGKTKNNKNISQSISSQPMESNPSIVLA
Q14244_152	LEEDKERHEAVVRRTMERSQKPKQKHNRWSWGGSLHGSPSI
Q14244_154	EDKERHEAVVRRTMERSQKPKQKHNRWSWGGSLHGSPSIHS
Q14244_156	KERHEAVVRRTMERSQKPKQKHNRWSWGGSLHGSPSIHSAD
Q14244_296	VTPPEGSSRRRIIHGTASYKKERERENVLFLTSGTRRAVSP
Q14244_32	RGGDGAVRSETAPDSYKVQDKKNASSRPASAISGQNNNHSG
Q14244_486	SVKTSAGTTDPEEATRLLAEKRRLAREQREKEERERREQEE
Q14244_703	NGVSVQNENFEEIINLPIGSKPSRLDVTNSESPEIPLNPIL
Q14247_171	QKDYSSGFGGKYGVQADRVDKSAVGFDYQGKTEKHESQRDY
Q14247_193	AVGFDYQGKTEKHESQRDYSKGFGGKYGIDKDKVDKSAVGF
Q14247_290	GGKFGVQSERQDSAAVGFDYKEKLAKHESQQDYSKGFGGKY
Q14247_314	AKHESQQDYSKGFGGKYGVQKDRMDKNASTFEDVTQVSSAY
Q14320_111	KEQSKELQMKLEKLREKERKKEAKRKISSLSFTLEEEEEGG
Q14320_152	EEEEEAAMYEEEMEREEITTKKRKLGKNPDVDTSFLPDRDR
Q14320_155	EEAAMYEEEMEREEITTKKRKLGKNPDVDTSFLPDRDREEE
Q14320_20	XMAQYKGAASEAGRAMHLMKKREKQREQMEQMKQRIAEENI
Q14320_216	SEEIEITFSYWDGSGHRRTVKMRKGNTMQQFLQKALEILRK
Q14432_1087	KRRKIYCQITQHLLQNHKMWKKVIEEEQRLAGIENQSLDQT
Q14432_1088	RRKIYCQITQHLLQNHKMWKKVIEEEQRLAGIENQSLDQTP
Q14432_1126	QTPQSHSSEQIQAIKEEEEEKGKPRGEEIPTQKPDQXXXXX
Q14432_958	RLLVCQMCIKLADINGPAKCKELHLQWTDGIVNEFYEQGDE
Q14493_176	KEVPRHLRQPGIHPKTPNKFKKYSRRSWDQQIKLWKVALHF
Q14493_188	HPKTPNKFKKYSRRSWDQQIKLWKVALHFWDPPAEEGCDLQ
Q14493_191	TPNKFKKYSRRSWDQQIKLWKVALHFWDPPAEEGCDLQEIH
Q14493_96	ASAVEEDEMRTRVNKEMARYKRKLLINDFGRERKSSSGSSD
Q14527_165	PLHMTFWGKEENRKAVSDQLKKHGFKLGPAPKTLGFNLESG
Q14527_389	IKEKSKFRMSELSSSRPKRRKTAVQYIESSDSEEIETSELP
Q14527_411	AVQYIESSDSEEIETSELPQKMKGKLKNVQSETKGRAKAGS
Q14527_428	LPQKMKGKLKNVQSETKGRAKAGSSKVIEDVAFACALTSSV
Q14527_467	SVPTTKKKMLKKGACAVEGSKKTDVEERPRTTLIICPLSVL
Q14527_649	GLRRLQSLIKNITLRRTKTSKIKGKPVLELPERKVFIQHIT
Q14527_743	TNAVSSNGPSGNDTPEELRKKLIRKMKLILSSGSDEECAIC
Q14527_749	NGPSGNDTPEELRKKLIRKMKLILSSGSDEECAICLDSLTV
Q14562_174	PSAAGQEKQRDAEHRDRTKKKKRSRSRDRNRDRDRDRERNR
Q14562_175	SAAGQEKQRDAEHRDRTKKKKRSRSRDRNRDRDRDRERNRD
Q14562_233	RERNKVKSRYRSRSRSQSPPKDRKDRDKYGERNLDRWRDKH
Q14562_24	AVAMAGALIGSEPGPAEELAKLEYLSLVSKVCTELDNHLGI
Q14562_240	SRYRSRSRSQSPPKDRKDRDKYGERNLDRWRDKHVDRPPPE
Q14562_484	IVKNPDGSLSQAAMMQSALAKERRELKQAQREAEMDSIPMG
Q14562_72	FVISLAEKNTTFDTFKASLVKNGAEFTDSLISNLLRLIQTM
Q14676_1010	SGGRGSPVSPRRHQKGLLNCKMPPAEKASRIRAAEKVSRGD
Q14676_2034	MGEIISCCGGTYLPSMPRSYKPQRVVITCPQDFPHCSIPLR
Q14676_246	QQPATEEASSAARRGATVEAKQSEAEVVTEIQLEKDQPLVK
Q14676_527	GIHLERSQASTTVDINTQVEKEVPPGSAIIHIKKHQVSVEG
Q14690_1421	GKPDVLSASLEGQLTKQEERKTEAEERDQKGEKKNQKRNEK
Q14690_1430	LEGQLTKQEERKTEAEERDQKGEKKNQKRNEKKNQKGQEEV
Q14690_1433	QLTKQEERKTEAEERDQKGEKKNQKRNEKKNQKGQEEVEMP
Q14690_1437	QEERKTEAEERDQKGEKKNQKRNEKKNQKGQEEVEMPSKEK
Q14690_1832	KDVRDIFERVIHLSLAPKRMKFFFKRYLDYEKQHGTEKDVQ
Q14690_1836	DIFERVIHLSLAPKRMKFFFKRYLDYEKQHGTEKDVQAVKA
Q14690_1843	HLSLAPKRMKFFFKRYLDYEKQHGTEKDVQAVKAKALEYVE
Q14690_1849	KRMKFFFKRYLDYEKQHGTEKDVQAVKAKALEYVEAKSSVL
Q14692_767	LEEVMNSIRDCFVTGKWEDDKDAAKVLAEDEELYGDFEDLE
Q14764_440	PPGVEELLNKGQDPLADRGEKDTAKSLQPLAPRNKTRVVSY
Q14764_476	RVVSYRVPHNAAVQVYDYREKRARVVFGPELVSLGPEEQFT
Q14764_506	LVSLGPEEQFTVLSLSAGRPKRPHARRALCLLLGPDFFTDV
Q14764_560	QLAYNWHFEVNDRKDPQETAKLFSVPDFVGDACKAIASRVR
Q14764_612	HKNSARIIRTAVFGFETSEAKGPDGMALPRPRDQAVFPQNG
Q14764_701	EQEARGRLERQKILDQSEAEKARKELLELEALSMAVESTGT
Q14764_747	ESRAEAARIEGEGSVLQAKLKAQALAIETEAELQRVQKVRE
Q14764_764	AKLKAQALAIETEAELQRVQKVRELELVYARAQLELEVSKA
Q14764_783	QKVRELELVYARAQLELEVSKAQQLAEVEVKKFKQMTEAIG
Q14764_793	ARAQLELEVSKAQQLAEVEVKKFKQMTEAIGPSTIRDLAVA
Q14781_94	KRPRGRPRKLTAMSSCSRRSKLKEPDAPSKSKSSSSSSSST
Q14807_488	RMVLMKTVEEKDLEIERLKTKQKELEAKMLAQKAEEKENHC
Q14865_158	GQKEALLKYRQSTLNSGLNFKDVLKEKADLGEDEEETNVIV
Q14865_197	IVLSYPQYCRYRSMLKRIQDKPSSILTDQFALALGGIAVVS
Q14865_254	LIENESICDEFAPNLKGRPRKKKPCPQRRDSFSGVKDSNNN
Q14865_255	IENESICDEFAPNLKGRPRKKKPCPQRRDSFSGVKDSNNNS
Q14865_256	ENESICDEFAPNLKGRPRKKKPCPQRRDSFSGVKDSNNNSD
Q14865_269	KGRPRKKKPCPQRRDSFSGVKDSNNNSDGKAVAKVKCEARS
Q14865_333	IGEECRADEQAFLVALYKYMKERKTPIERIPYLGFKQINLW
Q14865_336	ECRADEQAFLVALYKYMKERKTPIERIPYLGFKQINLWTMF
Q14865_442	PRKQENSSQENENKTKVSGTKRIKHEIPKSKKEKENAPKPQ
Q14865_450	QENENKTKVSGTKRIKHEIPKSKKEKENAPKPQDAAEVSSE
Q14865_482	QDAAEVSSEQEKEQETLISQKSIPEPLPAADMKKKIEGYQE
Q14865_49	LEGKPRILSLGDFFFVRCTPKDPICIAELQLLWEERTSRQL
Q14865_615	FPSFPTTQPPLANQNETEDDKLPAMADYIANCTVKVDQLGS
Q14934_388	SRKEVAGMDYLAVPSPLAWSKARIGGHSPIFRTSALPPLDW
Q14934_443	VQPRAHHRAHYETEGSRGAVKAAPGGHPVVKLLGYSEKPLT
Q14934_490	TADERNLRPHAFYQVHRITGKMVATASYEAVVSGTKVLEMT
Q14934_528	EMTLLPENNMAANIDCAGILKLRNSDIELRKGETDIGRKNT
Q14934_616	CSVRGGEELVLTGSNFLPDSKVVFIERGPDGKLQWEEEATV
Q14966_1064	NKAILQLDSPESAQSMYSFLKQNPQNIGDHMLTCSLSPKID
Q14966_1237	INPKTALLPSDSVFAEERNLKGILEESPSEAEDFISGITQT
Q14966_1430	KTENQKSFPKSVPRDQINAEKKLSAKEFGLLKPTSARSGLA
Q14966_1455	KEFGLLKPTSARSGLAESSSKFKPTQSSLTRGGSGRISALQ
Q14966_1457	FGLLKPTSARSGLAESSSKFKPTQSSLTRGGSGRISALQGK
Q14966_1519	IMKRDDSNNKTLAEQNTKNPKSTTGRSSKSKEEPLFPFNLD
Q14966_1529	TLAEQNTKNPKSTTGRSSKSKEEPLFPFNLDEFVTVDEVIE
Q14966_1564	VDEVIEEVNPSQAKQNPLKGKRKETLKNVPFSELNLKKKKG
Q14966_1566	EVIEEVNPSQAKQNPLKGKRKETLKNVPFSELNLKKKKGKT
Q14966_1583	GKRKETLKNVPFSELNLKKKKGKTSTPRGVEGELSFVTLDE
Q14966_371	IPHEPVINSSNVHVGSRGSKKNYQSQADIPIRSPFGIVKAS
Q14966_405	FGIVKASWLPKFSHADAQKMKRLPTPSMMNDYYAASPRIFP
Q14966_658	RCKSKNLEDDTLSECKQVSDKAVSLQRKLRKEQSLHYGSVL
Q14966_665	EDDTLSECKQVSDKAVSLQRKLRKEQSLHYGSVLLITELPE
Q14966_668	TLSECKQVSDKAVSLQRKLRKEQSLHYGSVLLITELPEDGC
Q14966_751	YIETTPLTIKGKSVKICVPGKKKAQNKEVKKKTLESKKVSA
Q14966_753	ETTPLTIKGKSVKICVPGKKKAQNKEVKKKTLESKKVSAST
Q14966_757	LTIKGKSVKICVPGKKKAQNKEVKKKTLESKKVSASTLKRD
Q14966_761	GKSVKICVPGKKKAQNKEVKKKTLESKKVSASTLKRDADAS
Q14966_782	KTLESKKVSASTLKRDADASKAVEIVTSTSAAKTGQAKASV
Q14966_817	QAKASVAKVNKSTGKSASSVKSVVTVAVKGNKASIKTAKSG
Q14966_915	EPLNKETEEMCVMLVSNLPNKGYSVEEVYDLAKPFGGLKDI
Q14966_927	MLVSNLPNKGYSVEEVYDLAKPFGGLKDILILSSHKKAYIE
Q14978_197	DEPPKNQKPKITPVTVKAQTKAPPKPARAAPKIANGKAASS
Q14978_208	TPVTVKAQTKAPPKPARAAPKIANGKAASSSSSSSSSSSSD
Q14978_338	PVESSEDSSDESDSSSEEEKKPPTKAVVSKATTKPPPAKKA
Q14978_448	EESSSSEEEKTKKMVATTKPKATAKAALSLPAKQAPQGSRD
Q14978_587	EEEKKKAAVVVSKSGSLKKRKQNEAAKEAETPQAKKIKLQT
Q14980_1068	LQEALAHALTEKEGKDQELAKLRGLEAAQIKELEELRQTVK
Q14980_267	KDAQIAMMQQRIDRLALLNEKQAASPLEPKELEELRDKNES
Q14980_297	ELEELRDKNESLTMRLHETLKQCQDLKTEKSQMDRKINQLS
Q14980_303	DKNESLTMRLHETLKQCQDLKTEKSQMDRKINQLSEENGDL
Q14980_312	LHETLKQCQDLKTEKSQMDRKINQLSEENGDLSFKLREFAS
Q14980_461	TERGQQEAKLLAERGHFEEEKQQLSSLITDLQSSISNLSQA
Q14980_531	NATIQQQDQELAGLKQQAKEKQAQLAQTLQQQEQASQGLRH
Q14980_54	SIFIKIIDRIHGTEEGQQILKQPVSERLDFVCSFLQKNRKH
Q14980_561	QQEQASQGLRHQVEQLSSSLKQKEQQLKEVAEKQEATRQDH
Q14980_613	EASLRERDAALKQLEALEKEKAAKLEILQQQLQVANEARDS
Q14980_808	ELAEAMAAQHTAESECEQLVKEVAAWRERYEDSQQEEAQYG
Q14980_939	LETLVRKAGEQQETASRELVKEPARAGDRQPEWLEEQQGRQ
Q15003_101	SPRLLASPSSRSIDISATIPKFTNTQITEHYSTCIKLSTEN
Q15003_142	KITTKNAFGLHLIDFMSEILKQKDTEPTNFKVAAGTLDAST
Q15003_217	VADGSATEMGTTKKAVKPKKKHLHRTIEQNINNLNVSEADR
Q15003_342	FQFTQWDSETHNESVSALVDKFKKNDQVFDINAEVDESDCG
Q15003_41	GHPHSASSPSERVFPMPLPRKAPLNIPGTPVLEDFPQNDDE
Q15003_424	EEMISLGDGDIRTMCPLLSMKPGEYSYFSPRTMSMWAGPDH
Q15003_462	PDHWRFRPRRKQDAPSQSENKKKSTKKDFEIDFEDDIDFDV
Q15022_211	VCHKKRKDVSCPIRQVPTGKKQVPLNPDLNQTKPGNFPSLA
Q15022_285	MINGETNENIDVNEELPARRKRNREDGEKTFVAQMTVFDKN
Q15022_293	NIDVNEELPARRKRNREDGEKTFVAQMTVFDKNRRLQLLDG
Q15022_330	LLDGEYEVAMQEMEECPISKKRATWETILDGKRLPPFETFS
Q15022_649	DNQMNHACMLFVENYGQKIIKKNLCRNFMLHLVSMHDFNLI
Q15029_422	HLTKEELKLNIRPLLRLVCKKFFGEFTGFVDMCVQHIPSPK
Q15029_442	KFFGEFTGFVDMCVQHIPSPKVGAKPKIEHTYTGGVDSDLG
Q15029_63	DDVGDHDDDHPGMEVVLHEDKKYYPTAEEVYGPEVETIVQE
Q15029_963	LSEDVSISKFFDDPMLLELAKQDVVLNYPMXXXXXXXXXXX
Q15047_1005	LSCNSVSEGGFADSDSHSSFKTNEGGEGRAGGSRMEAEKAS
Q15047_173	AMAALRKSAQDVQKFMDAVNKKSSSQDLHKGTLSQMSGELS
Q15047_174	MAALRKSAQDVQKFMDAVNKKSSSQDLHKGTLSQMSGELSK
Q15047_674	FLEMFCLDPYVLVDRKFQPYKPFYYILDITYGKEDVPLSCV
Q15047_686	VDRKFQPYKPFYYILDITYGKEDVPLSCVNEIDTTPPPQVA
Q15054_384	KTEPEPPSVKSSSGENKRKRKRVLKSKTYLDGEGCIVTEKV
Q15054_434	EEELNMKTSSVHRPPAMTVKKEPREERKGPKKGTAALGKAN
Q15054_441	TSSVHRPPAMTVKKEPREERKGPKKGTAALGKANRQVSITG
Q15054_84	SGSLIQNGHSCHKVAVVREDKLEAVKSKLAVTASIHVYSIQ
Q15059_336	DSILREMLSKKHAAYAWPFYKPVDAEALELHDYHDIIKHPM
Q15059_435	MPDEPVEAPALPAPAAPMVSKGAESSRSSEESSSDSGSSDS
Q15059_471	GSSDSEEERATRLAELQEQLKAVHEQLAALSQAPVNKPKKK
Q15059_48	NPSKPGRKTNQLQYMQNVVVKTLWKHQFAWPFYQPVDAIKL
Q15059_634	IEIDFETLKPTTLRELERYVKSCLQKKQRKPFSASGKKQAA
Q15059_640	TLKPTTLRELERYVKSCLQKKQRKPFSASGKKQAAKSKEEL
Q15059_657	LQKKQRKPFSASGKKQAAKSKEELAQEKKKELEKRLQDVSG
Q15059_684	KKKELEKRLQDVSGQLSSSKKPARKEKPGSAPSGGPSRLSS
Q15061_113	QTDLLALGTAVGSILLYSTVKGELHSKLISGGHDNRVNCIQ
Q15061_161	LYSCSDDKHIVEWNVQTCKVKCKWKGDNSSVSSLCISPDGK
Q15061_163	SCSDDKHIVEWNVQTCKVKCKWKGDNSSVSSLCISPDGKML
Q15061_165	SDDKHIVEWNVQTCKVKCKWKGDNSSVSSLCISPDGKMLLS
Q15061_326	YCKKPLTSNCTIQIATPGKGKKSTPKPIPILAAGFCSDKMS
Q15061_331	LTSNCTIQIATPGKGKKSTPKPIPILAAGFCSDKMSLLLVY
Q15061_344	KGKKSTPKPIPILAAGFCSDKMSLLLVYGSWFQPTIERVAL
Q15061_81	TCTCLAWAPARLQAKESPQRKKRKSEAVGMSNQTDLLALGT
Q15185_25	SAKWYDRRDYVFIEFCVEDSKDVNVNFEKSKLTFSCLGGSD
Q15326_470	MLHRSTQTTNDGVCQSMCHDKYTKIFNDFKDRMKSDHKRET
Q15326_544	MDRKCKQVKEKCKEEFVEEIKKLATQHKQLISQTKKKQWCY
Q15326_545	DRKCKQVKEKCKEEFVEEIKKLATQHKQLISQTKKKQWCYN
Q15361_440	DSVEGDGAMMEEGVKSRPRQKKTQACLASKHVQEAPRLEPA
Q15361_449	MEEGVKSRPRQKKTQACLASKHVQEAPRLEPANEEHNVETA
Q15361_54	HEIFRDSSLVNEQSQITRRKKRKKDFQHLISSPLKKSRICD
Q15361_57	FRDSSLVNEQSQITRRKKRKKDFQHLISSPLKKSRICDETA
Q15361_601	NLKRRYSFRLHIGRNIARPWKLIYYRAKKMFDVNNYKGRYS
Q15361_608	FRLHIGRNIARPWKLIYYRAKKMFDVNNYKGRYSEGDTEKL
Q15361_609	RLHIGRNIARPWKLIYYRAKKMFDVNNYKGRYSEGDTEKLK
Q15361_627	AKKMFDVNNYKGRYSEGDTEKLKMYHSLLGNDWKTIGEMVA
Q15361_629	KMFDVNNYKGRYSEGDTEKLKMYHSLLGNDWKTIGEMVARS
Q15361_687	GAWSKSETRKLIKAVEEVILKKMSPQELKEVDSKLQENPES
Q15361_69	ITRRKKRKKDFQHLISSPLKKSRICDETANATSTLKKRKKR
Q15361_728	CLSIVREKLYKGISWVEVEAKVQTRNWMQCKSKWTEILTKR
Q15361_738	KGISWVEVEAKVQTRNWMQCKSKWTEILTKRMTNGRRIYYG
Q15361_740	ISWVEVEAKVQTRNWMQCKSKWTEILTKRMTNGRRIYYGMN
Q15361_765	LTKRMTNGRRIYYGMNALRAKVSLIERLYEINVEDTNEIDW
Q15361_808	LASAIGDVPPSYVQTKFSRLKAVYVPFWQKKTFPEIIDYLY
Q15361_817	PSYVQTKFSRLKAVYVPFWQKKTFPEIIDYLYETTLPLLKE
Q15361_818	SYVQTKFSRLKAVYVPFWQKKTFPEIIDYLYETTLPLLKEK
Q15361_838	KTFPEIIDYLYETTLPLLKEKLEKMMEKKGTKIQTPAAPKQ
Q15361_84	SSPLKKSRICDETANATSTLKKRKKRRYSALEVDEEAGVTV
Q15361_845	DYLYETTLPLLKEKLEKMMEKKGTKIQTPAAPKQVFPFRDI
Q15398_363	WTPLKTEVDESQATKEILAQKCKTYSTKTIQQDSNKLPCPL
Q15398_479	IPDDAKDLIRTAVGQTRLLMKERFKQFEGLVDDCEYKRGIK
Q15398_483	AKDLIRTAVGQTRLLMKERFKQFEGLVDDCEYKRGIKETTC
Q15398_499	KERFKQFEGLVDDCEYKRGIKETTCTDLDGFWDMVSFQIED
Q15398_523	CTDLDGFWDMVSFQIEDVIHKFNNLIKLEESGWQVNNNMNH
Q15398_547	LIKLEESGWQVNNNMNHNMNKNVFRKKVVSGIASKPKQDDA
Q15398_552	ESGWQVNNNMNHNMNKNVFRKKVVSGIASKPKQDDAGRIAA
Q15398_561	MNHNMNKNVFRKKVVSGIASKPKQDDAGRIAARNRLAAIKN
Q15398_770	EGMELNSSITSQDVLMSSPEKNTASQNSILEEGETKISQSE
Q15398_98	KPRAMKTILGDQRKQMLQKYKEEKQLQKLKEQREKAKRGIF
Q15459_399	PLPPTPDQVIVRKDYDPKASKPLPPAPAPDEYLVSPITGEK
Q15459_531	RTQQAAQANITLQEQIEAIHKAKGLVPEDDTKEKIGPSKPN
Q15459_533	QQAAQANITLQEQIEAIHKAKGLVPEDDTKEKIGPSKPNEI
Q15459_683	APAPMPPVHPPPPMEDEPTSKKLKTEDSLMPEEEFLRRNKG
Q15464_105	RAQKERDFEDPYNGPGSSLRKLRAMCRLDYCGGSGEPGGVQ
Q15464_15	XXXXXXMAKWLNKYFSLGNSKTKSPPQPPRPDYREQRRRGE
Q15464_182	YRSSSERRPATPAEVRYISPKHRLIKVESAAGGGAGDPLGG
Q15464_489	GQNSPPFDSVPEVIHYYTTRKLPIKGAEHLSLLYPVAVRTL
Q15464_493	PPFDSVPEVIHYYTTRKLPIKGAEHLSLLYPVAVRTLXXXX
Q15464_88	GSLPDDSGSTSDLIRAYRAQKERDFEDPYNGPGSSLRKLRA
Q15554_100	PAERGAGEARLEEAVNRWVLKFYFHEALRAFRGSRYGDFRQ
Q15554_182	FDMEAELTPLESAINVLEMIKTEFTLTEAVVESSRKLVKEA
Q15554_209	EAVVESSRKLVKEAAVIICIKNKEFEKASKILKKHMSKDPT
Q15554_215	SRKLVKEAAVIICIKNKEFEKASKILKKHMSKDPTTQKLRN
Q15554_537	KNYPFVNRTAVMIKDRWRTMKRLGMNXXXXXXXXXXXXXXX
Q15652_1284	FKSSSEQSLTEMWRPNNNLSKEKTEWHVEKSSGKLQAAMAS
Q15652_1483	TGSVVQPSSGFSGTTDFIHLKKHKAALAAAQYKSSNASETE
Q15652_1832	KFCQLVTSEKTALSWVKKDAKIAWKRAVRGVREMCDACEAT
Q15652_2401	KDSSEIPGALWHIYAGKDVDKIREFLQKISKEQGLEVLPEH
Q15652_326	QRSIRPNKRKGSDSSIPDEEKMKEEKYDYISRGENPKGKNK
Q15696_17	XXXXMAAPEKMTFPEKPSHKKYRAALKKEKRKKRRQELARL
Q15697_129	RCPMSSKEIVTLVEDFHRASKKPKQWVAVCMQGQKVLLEKT
Q15723_199	KPKTQQSPISNGSPELGIKKKPREGKGNTTYLWEFLLDLLQ
Q15723_252	QREKGIFKLVDSKAVSKLWGKHKNKPDMNYETMGRALRYYY
Q15744_170	QTAMHLPPTLAAPGQPLRVLKAPLATAAPPCSPLLKAPSPA
Q15744_197	APPCSPLLKAPSPAGPLHKGKKAVNKDSLEYRLRRERNNIA
Q15785_175	QKRWNSLPSENHKEMAKSKSKETTATKNRVPSAGDVEKARV
Q15788_740	SVTGQVQGNSSIKLELDASKKKESKDHQLLRYLLDKDEKDL
Q15906_197	KITEELNLRSLETYERLEADKKKQVHKKRKCPGPIITYHSV
Q15906_199	TEELNLRSLETYERLEADKKKQVHKKRKCPGPIITYHSVTV
Q15906_204	LRSLETYERLEADKKKQVHKKRKCPGPIITYHSVTVPLVGE
Q15910_241	DKIFEAISSMFPDKGTAEELKEKYKELTEQQLPGALPPECT
Q15910_245	EAISSMFPDKGTAEELKEKYKELTEQQLPGALPPECTPNID
Q15910_270	QQLPGALPPECTPNIDGPNAKSVQREQSLHSFHTLFCRRCF
Q15910_291	SVQREQSLHSFHTLFCRRCFKYDCFLHPFHATPNTYKRKNT
Q15910_307	RRCFKYDCFLHPFHATPNTYKRKNTETALDNKPCGPQCYQH
Q15910_492	KESSIIAPAPAEDVDTPPRKKKRKHRLWAAHCRKIQLKKDG
Q15910_505	VDTPPRKKKRKHRLWAAHCRKIQLKKDGSSNHVYNYQPCDH
Q15910_509	PRKKKRKHRLWAAHCRKIQLKKDGSSNHVYNYQPCDHPRQP
Q15910_510	RKKKRKHRLWAAHCRKIQLKKDGSSNHVYNYQPCDHPRQPC
Q15910_569	CSSECQNRFPGCRCKAQCNTKQCPCYLAVRECDPDLCLTCG
Q15910_602	PDLCLTCGAADHWDSKNVSCKNCSIQRGSKKHLLLAPSDVA
Q15910_611	ADHWDSKNVSCKNCSIQRGSKKHLLLAPSDVAGWGIFIKDP
Q15910_612	DHWDSKNVSCKNCSIQRGSKKHLLLAPSDVAGWGIFIKDPV
Q16531_579	GLWTDISARILKLPSFELLHKEMLGGEIIPRSILMTTFESS
Q16531_627	GDGALFYFGLNIETGLLSDRKKVTLGTQPTVLRTFRSLSTT
Q16531_674	DRPTVIYSSNHKLVFSNVNLKEVNYMCPLNSDGYPDSLALA
Q16560_209	SRERHWDSRTRDRDHDRGREKRWQEREPTRVWPDNDWERER
Q16587_119	EEPWSMQREVPRGPCPEWELKAVPSQQQGICKEEPAQEPIM
Q16649_93	DAMYWEKRRKNNEAAKRSREKRRLNDLVLENKLIALGEENA
Q16656_105	VATGKKRKRPHVFESNPSIRKRQQTRLLRKLRATLDEYTTR
Q16656_114	PHVFESNPSIRKRQQTRLLRKLRATLDEYTTRVGQQAIVLC
Q16656_158	SKPNPVFKVFGAAPLENVVRKYKSMILEDLESALAEHAPAP
Q16656_160	PNPVFKVFGAAPLENVVRKYKSMILEDLESALAEHAPAPQE
Q16656_92	AAAGPVGMAAAAAVATGKKRKRPHVFESNPSIRKRQQTRLL
Q16658_464	SGDTPVDFFFEFCDYNKVAIKVGGRYLKGDHAGVLKASAET
Q16666_100	ETLKKEKLKVKGPALSRKRKKEVDATSPAPSTSSTVKTEGA
[truncated: 2,494 more rows]
