# Supplementary material for: An application of topological data analysis in predicting sumoylation sites
Source: PeerJ. 2023 Oct 12;11:e16204. doi: 10.7717/peerj.16204 (PMC10576966; doi:10.7717/peerj.16204)
Supplement: Supplemental Information 13 [file peerj-11-16204-s013.xlsx]

## Sheet: Sheet1
	label	seq
0	1	YNGSNIQLSKICLSHSEEFIKKEPLSDTTSQCMKDVQIILD
1	1	GRRFGQSAALTRHQWAHAEEKPHRCPDCGKGFGHSSDFKRH
2	1	KIHISNNYENNFFHSSLLTLKQEVHIREKSFQCNESGKAFN
3	1	VWLGASDRSHPATFPTRMHLKTEPDSRQQVYISHLGHGVRG
4	1	RDSASAAGAPSSQDLSPPDVKEEAGWVPERPGPAEEEEELE
5	1	VFGEAKIEDLSQQAQLAAAEKFKVQGEAVSNIQENTQTPTV
6	1	RPVCRKFMQDPMEVFVDDETKLTLHGLQQYYVKLKDSEKNR
7	1	MLLCKIMLNTPEDVQALVSGKLALRYAGRQTEALKCVAQAS
8	1	KMCYEAKEWDLLNENIMLLSKRRSQLKQAVAKMVQQCCTYV
9	1	FARRSNVLTGLQDSSTDNRAKLDLGAQGKGQGHQYELNSKK
10	1	AKLDLGAQGKGQGHQYELNSKKHHQYQPHSKERAGKPPPPG
11	1	LQYQGGHKEAPSPTCPDLGAKSHPPDKWAQGAGAKGYLGAV
12	1	SHPPDKWAQGAGAKGYLGAVKPLAGAAGAPGKGSEKGPPNG
13	1	GKMKIVKNKNKNGRIVIVMSKYMENGMQAVKIKSGEVAEGE
14	1	DERHPPADRTFKKAAGAEEKKVEAPPKRREEEVSGVSDPQP
15	1	SRKLSPTKEAFGEQPLQLTTKPDLLAWDPARNTHPPSHHPH
16	1	DLRCVKTRSEAGEPPSSLQVKPETPASAAVAVAAAAAPTTT
17	1	KDSEKVVSISSEHLEPITPTKNNKVKVILGEDREATGVLLS
18	1	IITGPPEAQFKAQGRIYGKIKEENFVSPKEEVKLEAHIRVP
19	1	RVTFALPDDAETEDTGVLNVKKNSDEVKSSFEKRQEKMNEK
20	1	LEKELLEKKPWQLQGEVTAQKRPENSLLEETLHFDHAVRMA
21	1	YCRLAQFIGNRRELNEDKLEKLEELTMDGAKAKAILDASRS
22	1	PCFKSDHGRRFTMGERIGAIKQESEEPPTKKNRMQLSDDEG
23	1	RQLQEEQLMKLNSGLGQLILKEEMEKESRERSSLLASRYDS
24	1	EPLPMETEEEDPKEEPIKEIKEEPKEEEMTEEEKAAQKAKP
25	1	TELANALSYCHSKRVIHRDIKPENLLLGSAGELKIADFGWS
26	1	TEVLLEEPLPLETARESPSFKLEPMETERSPGPRLQELLGP
27	1	PSVQSCKEGLSPRGPAPGEEKFENLEGVPSVCSENIHPQVL
28	1	ALAGASSGRELGRPKELQPKKLHLCPLCGKNFSNNSNLIRH
29	1	EAVSDSTPFLTNHGAHKAEKKLFECLTCGKSFRQGMHLTRH
30	1	LTNHGAHKAEKKLFECLTCGKSFRQGMHLTRHQRTHTGEKP
31	1	KQKPSIPPTLTKAPSLTDLVKSGPGKAKEPGADPAKSVIIP
32	1	HCKAARRSADIGAEGAPSHLKVELPPDPVEAEAAPHTDQDH
33	1	LPPDPVEAEAAPHTDQDHVCKHEEEATDITPAADKTAAHIC
34	1	KKPPLKKGEKEKKKSNLELFKEELKQIQEERDERHKTKGRL
35	1	DEEDTQSSKSEEHHLYSNPIKEEMTESKFSKYSEMSEEKRA
36	1	MLKLRSLSEGPPKELKIRLIKVESGDKETFIASEVEERRLR
37	1	FQCENPEVGLGEKEHMRVVVKSEPLSSPEPQDEVSDVTSQA
38	1	LEVTNNLEHKSTFSISNFLNKSRGNNFTANQNNDDNIPNTT
39	1	SQPGPPQLTRASADVLSKCKKALSEHNVLVVEGARKYACKI
40	1	KTCIRAHQRVKFTKDHTVRQKEEVSPEAVGVTSQRPVFCPF
41	1	NIINLGSLVIEDKESQPQMPKQNPVVEQNSQPPSGLSSNQL
42	1	NPVVEQNSQPPSGLSSNQLSKFPTQISLAQLRLQHMQQQVM
43	1	PPHPQQLRYPPNQNIPRQAIKPNPLQMAFLAQQAIKQWQIS
44	1	XXXXXXXXXXXXXXMEVAVEKAVAAAAAASAAASGGPSAAP
45	1	PIRSPSASSVGSRGSSGSSSKPAGADSTHKVPVVMLEPIRI
46	1	VGSRGSSGSSSKPAGADSTHKVPVVMLEPIRIKQENSGPPE
47	1	PAGADSTHKVPVVMLEPIRIKQENSGPPENYDFPVVIVKQE
48	1	PTLTNFPSGEWICTFCRDLSKPEVEYDCDAPSHNSEKKKTE
49	1	ELALLDGSNVVFKLLGPVLVKQELGEARATVGKRLDYITAE
50	1	HDRYLVVGRKRRKEDLLDQLKQEGQVGHYELVMPQANXXXX
51	1	PMHPIQQSRVPHGRIMTPSVKVEKIHPKMDGTLLKSAVGPT
52	1	SDYIQSVFKRPEALPTKPKVKVEAPSSSPAPAPSPVLQREA
53	1	MAFANLRKVLISDSLDPCCRKILQDGGLQVVEKQNLSKEEL
54	1	ADELMHRECLPPSTVTEILMKNEGSYGGHHHPSAPHATPAG
55	1	AASSKTSSGDASSLSIEETNKLRAKLGLKPLEVNAIKKEAG
56	1	EETNKLRAKLGLKPLEVNAIKKEAGTKEEPVTADVINPMAL
57	1	REKLAAAKEKRLLNQKLGKIKTLGEDDPWLDDTAAWIERSR
58	1	KKPDYLPYAEDESVDDLAQQKPRSILSKYDEELEGERPHSF
59	1	STVGPRLASEYLTPEEMVTFKKTKRRVKKIRKKEKEVVVRA
60	1	EEMVTFKKTKRRVKKIRKKEKEVVVRADDLLPLGDQTQDGD
61	1	GLAAALLLCQNKGLLETTVQKVARVKAPNKSLPSAVYCIED
62	1	MAIDDKYSRREEYRGFTQDFKEKDGYKPDVKIEYVDETGRK
63	1	SSSDTPLGTVALLQEKQKAQKTPYIVLSGSGKSMNANTITK
64	1	LLQEKQKAQKTPYIVLSGSGKSMNANTITKXXXXXXXXXXX
65	1	YTRPMYSKPSIMAHKRWIHVKPERLEQACEGMDVHATYDEH
66	1	QTEHTVQPSGVEEDFHIGEKKVEAEFDEQADESNYDEQVDF
67	1	MWRDSFHRHVTSCTKSYEAAKAEQNTTEANXXXXXXXXXXX
68	1	ERSYECGESSKVFKYNSSLIKHQIIHTGKRPXXXXXXXXXX
69	1	EEQRQAKGDAEEMAQKKQEIKVEVKEEKPSVSKEEKPSVSK
70	1	QAKGDAEEMAQKKQEIKVEVKEEKPSVSKEEKPSVSKVEMQ
71	1	QNCLASLPDDLPHSEAGMRVKTEPMDADDSNNCTGQNEHQR
72	1	SKMNAQETATGMAFEEPIDEKKFEKTEDGGEFEEGASENNA
73	1	EAESVLAVVAAVLKLGNIEFKPESRVNGLDESKIKDKNELK
74	1	KDLGSQTPQALTFNDGMSEVKDEQTPGWTTAASDMKFEYLL
75	1	LNEQRLEGEFCDIAIVVEDVKFRAHRCVLAACSTYFKKLFK
76	1	TKAHVFECNLESSVESIISPKVKMALRTSGHLLLGVVRIYH
77	1	LDSIVIQQGRLVDQNLNKIGKDEMLQMIRHGATHVFASKES
78	1	NFTMDTESSVYNFEGEDYREKQKIAFTEWIEPPKRERKANY
79	1	EGEDYREKQKIAFTEWIEPPKRERKANYAVDAYFREALRVS
80	1	DDASPGKQKEIQEPDPTYEEKMQTDRANRFEYLLKQTELFA
81	1	NYTEEEDRFLICMLHKLGFDKENVYDELRQCIRNSPQFRFD
82	1	EVQKVLQIVDNTVSRQKMDCKAEEISKLKGYHMKDPCSQPE
83	1	EQRKVYQYSNSRSPSLERSSKPLAPNSNPPTKDSLLPRSPV
84	1	HNSVSSSSENSDEPLNLTFIKKEFSNSNNLDNKSTNPVFSM
85	1	SQPIAQQPLQGGDHSGNYGYKSENQEFYQDTFGQQWKXXXX
86	1	ISLHSGLHHRPDKISDHSSVKQEYTHKAGSSKHHGPISTTP
87	1	KYEALQTFARTVARGPVAPSKVATTSVITIVKSTELSSTSV
88	1	LTDEVIIPHSGWEREPNEDCKPRHIEWESVLTNTAGCLRNV
89	1	RALETLTGALFQRPPLIAAVKRQLRVRTIYESKMIEYDPER
90	1	RKSLPEEDVAEIQHAEEFLIKPESKVAKLDTSQWPLLLKNF
91	1	PTDSTPATWKQEYVDYSESAKKEVVAEVVKAPQVVAEAAKT
92	1	EDMMHPLKVSLEDLYNGKTTKLQLSKNVLCSACSGQGGKSG
93	1	LPGEKLGRVVHIIQSREPSLKNSNPDEIEIDFETLKPSTLR
94	1	FAWPFQQPVDAVKLNLPDYYKIIKTPMDMGTIKKRLENNYY
95	1	SENEPVDTNSDNNLFTDTDLKSIVKNSASKSHAAEKLRSNK
96	1	REMDDVAIEDEVLEQLFKDTKPELEIDVKVQKQEEDVNVRK
97	1	VQQNKLSVQSNPSPQLRSVMKVESSENVPSPTHPPVVINAA
98	1	EVVQSTRPIIEGSISQGTPIKFDNNSGQSAIKHNVKSLITG
99	1	MMNRTSDVTISSNKSTNHERKSTLTPTQRESIPAKSPVPGV
100	1	YQNTIVAGSLITKSNLHAMIKAEESSKQEECTTTSTAPVPT
101	1	PTSPLAMEYVNDFDLMKFEVKKEPVETDRIISQCGRLIAGG
102	1	FINNPLFASTLLNLKQAEEAKTADTAIPFHSTDDPPRPTFD
103	1	KKLRRLLKYMFIRDYKSKIVKGIDEDDLLEDKLSGSNNANK
104	1	IRDYKSKIVKGIDEDDLLEDKLSGSNNANKRQKIAQDFLNS
105	1	SKRKRRWDQTADQTPGATPKKLSSWDQAETPGHTPSLRWDE
106	1	DERNRPLSDEELDAMFPEGYKVLPPPAGYVPIRTPARKLTA
107	1	FPPKFVQLKPGEKPVPVDQTKKEAEPIPETVKPEEKETTKN
108	1	SKKQKPLDFSTNQKLSAFAFKQEXXXXXXXXXXXXXXXXXX
109	1	RPNSEEKCHKCEECGKGFVRKAHFIQHQRVHTGEKPFQCNE
110	1	YGNLVSLDVLNRDKDEEPTVKQEIEEIEEEVEPQGVIVTRI
111	1	EEPSAKRTCPSLSPTSPLNNKGILSLPHQASPVSRTPSLPA
112	1	ANAIKAECSIRLPKAAKTPLKIHPLVRLPLATIVKDLVAQA
113	1	AAATAHNGFSCSNCSMLSERKDVLTAHPAAPGPVSRVYSRD
114	1	AYPDNHLSQVDVNELFSKLLKTGILKLSQTDSATTQVSEVT
115	1	PRAPKQQQHRLSVDANLQIPKELTLASKRELLQKTSERLAS
116	1	VQPFTYTPDPAAAGALNVNVKKEISSPARPCSFEEAMKAMK
117	1	GAVEVGQRVQTSSVAALGNVKPFRTRAGRVQWGVPQCAQEA
118	1	NTESKESDTKNEVNGTSEDIKSEGDTQSNXXXXXXXXXXXX
119	1	EQVLSKKTPPAPSPFDLPELKHVATEYQENKAPGKKKKRAL
120	1	VLAQQQGQKLSEVAEAIQTVKVEVAHISGGEXXXXXXXXXX
121	1	TQSRPGGPPNPPGPSPKALAKMMGGAGPGSSLEARSPSDLH
122	1	PGAGPAQVPRELSLTPITGAKPSATGYLGSVAAKRPLQEDR
123	1	DRLLPAEVKAKTYIQTELPFKAKTLHEKTSHSSTEACCELC
124	1	SIQEEWVRHLQRHILEMNFSKADPPPEESQAPQAQTAAAEA
125	1	GLPDAHLGLPPGLAKKSSSLKEVVAGAPRPGLLSLAKPLDA
126	1	SSSLKEVVAGAPRPGLLSLAKPLDAPAVNKAIKSPPGFSAK
127	1	PGMGLGPRGEGRANPIPTVLKRDQEGLGYRSAPQPRVTHFP
128	1	SKMNKSRQRVRYDSSNQVKGKPDLNTALPVRQTASIFKQPV
129	1	GMVVERDDGSTLMEIDGDKGKQGGPTYYIDTNALRVPRENM
130	1	ALSEKRTLEGELHDLRGQVAKLEAALGEAKKQLQDEMLRRV
131	1	KQLQDEMLRRVDAENRLQTMKEELDFQKNIYSEELRETKRR
132	1	LRRVDAENRLQTMKEELDFQKNIYSEELRETKRRHETRLVE
133	1	AQHEDQVEQYKKELEKTYSAKLDNARQSAERNSNLVGAAHE
134	1	SGAQASSTPLSPTRITRLQEKEDLQELNDRLAVYIDRVRSL
135	1	AEMRARMQQQLDEYQELLDIKLALDMEIHAYRKLLEGEEER
136	1	RSRGRASSHSSQTQGGGSVTKKRKLESTESRSSFSQHARTS
137	1	KFVRLRNKSNEDQSMGNWQIKRQNGDDPLLTYRFPPKFTLK
138	1	NWQIKRQNGDDPLLTYRFPPKFTLKAGQVVTIWAAGAGATH
139	1	DNFGIVEGLMTTVHAITATQKTVDGPSGKLWRDGRGALQNI
140	1	EPRPFPKLRILRKVEKIDDFKAEDFQIEGYNPHPTIKMEMA
141	1	SLETEHKALTSEIALLQSRLKTEGSDLCDRVSEMQKLDAQV
142	1	AGKEGNNPAENGDAKTDQAQKAEGAGDAKXXXXXXXXXXXX
143	1	QPPHHLPQQMPVQHPRLQALKEEPQTVPEMPGETPPLSPID
144	1	NPKILKQSMTLNLADPVGSLKPHLRAKNSDLLTSPDVGLLK
145	1	GNWDKTVDVSDMGPSHIINIKKEKRETDEETKQILRMLEKD
146	1	MGPSHIINIKKEKRETDEETKQILRMLEKDDFLDDPGLRND
147	1	QLPLAHSGWLFKEENDEPDVKPWLAGPKEEDMEVDIPAVKV
148	1	LTLGGVKKKTFTPNIISRKIKEEPKEEVTVKKEKRERDRDR
149	1	FTPNIISRKIKEEPKEEVTVKKEKRERDRDRQREGHGRGRG
150	1	TRAEGQRQAQEYEALLNIKVKLEAEIATYRRLLEDGEDFNL
151	1	NKYEDEINKRTEMENEFVLIKKDVDEAYMNKVELESRLEGL
152	1	RAEAESMYQIKYEELQSLAGKHGDDLRRTKTEISEMNRNIS
153	1	IKYEELQSLAGKHGDDLRRTKTEISEMNRNISRLQAEIEGL
154	1	CHSRRVLHRDLKPQNLLIDDKGTIKLADFGLARAFGIPIRV
155	1	SIRDTPAKNAQKSNQNGKDSKPSSTPRSKGQESFKKQEKTP
156	1	KQEKTPKTPKGPSSVEDIKAKMQASIEKGGSLPKVEAKFIN
157	1	TPKGPSSVEDIKAKMQASIEKGGSLPKVEAKFINYVKNCFR
158	1	SVEDIKAKMQASIEKGGSLPKVEAKFINYVKNCFRMTDQEA
159	1	MDMSPLRPQNYLFGCELKADKDYHFKVDNDENEHQLSLRTV
160	1	AYTNFDAERDALNIETAIKTKGVDEVTIVNILTNRSNAQRQ
161	1	SKRQRVSGNTSRRGKSGFNSKSGQRGSSKSGKLKGDDLQAI
162	1	IKQKVDSLLENLEKIEKEQSKQAVEMKNDKSEEEQSSSSVK
163	1	SLLENLEKIEKEQSKQAVEMKNDKSEEEQSSSSVKKDETNV
164	1	KSDVEAIFSKYGKIVGCSVHKGFAFVQYVNERNARAAVAGE
165	1	GEDGRMIAGQVLDINLAAEPKVNRGKAGVKRSAAEMYGSVT
166	1	MDPGKDKEGVPQPSGPPARKKFVIPLDEDEVPPGVAKPLFR
167	1	DKVRFLEQQNKILLAELEQLKGQGKSRLGDLYEEEMRELRR
168	1	LQSFRQDVDNASLARLDLERKVESLQEEIAFLKKLHEEEIQ
169	1	VEAANYQDTIGRLQDEIQNMKEEMARHLREYQDLLNVKMAL
170	1	ETNLDSLPLVDTHSKRTLLIKTVETRDGQVINETSQHHDDL
171	1	NYVPEVSALDQEIIEVDPDTKEMLKLLDFGSLSNLQVTQPT
172	1	MNRAIQRLQAEIDNIKNQRAKLEAAIAEAEERGELALKDAR
173	1	VEAIKNAIANASTLAEVERLKGLLQSGQIPGRERRSGPTDD
174	1	FRPEYSASQLKGFSLLATEDKEALKKQLPGVKSEGKRKGDE
175	1	GFSLLATEDKEALKKQLPGVKSEGKRKGDEVDGVDEVAKKK
176	1	KEANIRVVSEDFLQDVSASTKSLQELFLAHILSPWGAEVKA
177	1	VVAPRGKSGAALSKKSKGQVKEEGINKSEKRMKLTLKGGAA
178	1	VRKKSQEKKTSLKRTSKTNPKKHGSEEAKRGAADVSSPEAW
179	1	TALALQARRNPAGTKWMEHVKLERLKQVNGMFPRLNPILPP
180	1	GDYMSEPEAVLTRRKSNVIRKPCAAEPALSAGSLAAEPAEN
181	1	PLKIVSQPLAFLEEDIREVLKEETGTDLFLKEEDEPAYKSC
182	1	GPWTKEEDQKVIELVKKYGTKQWTLIAKHLKGRLGKQCRER
183	1	NHWNSTIKRKVDTGGFLSESKDCKPPVYLLLELEDKDGLQS
184	1	EPIGTDLDAVRTPEPLEEFPKREDQEGSPPETSLPYKWVVE
185	1	PISPSTEVGGSGIGTPPSVLKRQRKRRVALSPVTENSTSLS
186	1	CSQKVVVTTPLHRDKTPLHQKHAAFVTPDQKYSMDNTPHTP
187	1	FVTPDQKYSMDNTPHTPTPFKNALEKYGPLKPLPQTPHLEE
188	1	DNTPHTPTPFKNALEKYGPLKPLPQTPHLEEDLKEVLRSEA
189	1	LTLSGIKEDNSLLNQGFLQAKPEKAAVAQKPRSHFTTPAPM
190	1	DAAGVASLLTTAEVVVTEIPKEEKDPGMGAMGGMGGGMGGG
191	1	MDLFRSTMKPVQKVLEDSDLKKSDIDEIVLVGGSTRIPKIQ
192	1	DKSTGKENKITITNDKGRLSKEDIERMVQEAEKYKAEDEKQ
193	1	PQIKDEPEDDGYFVPPKEDIKPLKRPRDEDDADYKPKKIKT
194	1	PPKEDIKPLKRPRDEDDADYKPKKIKTEDTKKEKKRKLEEE
195	1	IKTEDTKKEKKRKLEEEEDGKLKKPKNKDKDKKVPEPDNKK
196	1	KVPEPDNKKKKPKKEEEQKWKWWEEERYPEGIKWKFLEHKG
197	1	RKQMSKEEKLKIKEENEKLLKEYGFCIMDNHKERIANFKIE
198	1	TKKVVESKKKAVQRLEEQLMKLEVQATDREENKQIALGTSK
199	1	AEVLPSPRGQRVIPRITIEMKAEAEKKNKKKIKNENTEGSP
200	1	IPRITIEMKAEAEKKNKKKIKNENTEGSPQEDGVELEGLKQ
201	1	EGLKQRLEKKQKREPGTKTKKQTTLAFKPIKKGKKRNPWSD
202	1	EKKQKREPGTKTKKQTTLAFKPIKKGKKRNPWSDSESDRSS
203	1	QKREPGTKTKKQTTLAFKPIKKGKKRNPWSDSESDRSSDES
204	1	TDDEDFVPSDASPPKTKTSPKLSNKELKPQKSVVSDLEADD
205	1	ASPPKTKTSPKLSNKELKPQKSVVSDLEADDVKGSVPLSSS
206	1	DDSDSNFEKIVSKAVTSKKSKGESDDFHMDFDSAVAPRAKS
207	1	YVPALIFGQLLTSSNYDDDEKKVTGGRNGYGAKLCNIFSTK
208	1	VPALIFGQLLTSSNYDDDEKKVTGGRNGYGAKLCNIFSTKF
209	1	XXXXMEVSPLQPVNENMQVNKIKKNEDAKKRLSVERIYQKK
210	1	RRAYDIAGSTKDVKVFLNGNKLPVKGFRSYVDMYLKDKLDE
211	1	TKENMTLQPKSFGSTCQLSEKFIKAAIGCGIVESILNWVKF
212	1	FIKAAIGCGIVESILNWVKFKAQVQLNKKCSAVKHNRIKGI
213	1	CGIVESILNWVKFKAQVQLNKKCSAVKHNRIKGIPKLDDAN
214	1	QVQLNKKCSAVKHNRIKGIPKLDDANDAGGRNSTECTLILT
215	1	KVSKNKQEMAFYSLPEFEEWKSSTPNHKKWKVKYYKGLGTS
216	1	EFEEWKSSTPNHKKWKVKYYKGLGTSTSKEAKEYFADMKRH
217	1	TPNHKKWKVKYYKGLGTSTSKEAKEYFADMKRHRIQFKYSG
218	1	HKKWKVKYYKGLGTSTSKEAKEYFADMKRHRIQFKYSGPED
219	1	STSKEAKEYFADMKRHRIQFKYSGPEDDAAISLAFSKKQID
220	1	GPEDDAAISLAFSKKQIDDRKEWLTNFMEDRRQRKLLGLPE
221	1	LTLPLLRQTAGKVLAHFYGVKLEGKVPMHKLFLEMLEAMMD
222	1	KKEHLDDYGEAPVETDGEHVKRTCTSVPETLHLNPSLKHTL
223	1	NMLNPPAEVTTKSQIPLSKIKTLFPLIEAKKKDQVTAQEIF
224	1	DQVTAQEIFQDNHEDGPTAKKLKTEQGGAHFSVSSLAEGSV
225	1	IKQLNHFWEIVVQDGITLITKEEASGSSVTAEEAKKFLAPK
226	1	MKITDLRGISTKGAERAITLKMEIPGPMPPLIREMLENPEM
227	1	REKKDFRQVIVNDCHLPESFKEEENQKCKKSGGKYSLNSGA
228	1	XMTAELREAMALAPWGPVKVKKEEEEEENFPGQASSQQVHS
229	1	MTAELREAMALAPWGPVKVKKEEEEEENFPGQASSQQVHSE
230	1	QKCKKSGGKYSLNSGAVKNPKTQLGQKPFTCSVCGKGFSQS
231	1	LAAVRNEAVVISGRKLAQQIKQEVRQEVEEWVASGNKRPHL
232	1	RPSKKGKKPKTEKEDKVKHIKQEPVESSLGLSNGVSDLSPE
233	1	RKASDVHEVRKVLGEKGKNIKIISKIENHEGVRRFDEILEA
234	1	ADLVEALQEFGPISYVVVMPKKRQALVEFEDVLGACNAVNY
235	1	GGGGRYYGGGSEGGRAPKRLKTDNAGDQHGGGGGGGGGAGA
236	1	PAPGLQPMRSGGGSVGAVVVKQEPLEEDSPSSSSAGLDKAQ
237	1	GSSGSPAHAESYSSGGGGQQKFRVDMPGSGSAFIPTINAIT
238	1	DLNFQAGFLMKKEVQDEEKNKKFGLSVGHHLGKSIPTDNQI
239	1	LNFQAGFLMKKEVQDEEKNKKFGLSVGHHLGKSIPTDNQIK
240	1	LSCPWECETKGESQNTDLSPKPLISEQTVILGKTPLGRIDQ
241	1	LWKETVFTKSPYQEFTDHLVKTHTRVSVQRTQAPAVATTXX
242	1	PPDSYSGLGRAGATAAASEIKREEKEDEENTSAADHSEEEK
243	1	LEDLESELDDPGQPVSLRRRKREVLVEDMVSQEEAQGLPSS
244	1	DPVQESSSFDLHHEATQSHFKHSSRKPRLLQSRALPAAHIP
245	1	SPRDQAMASALFTADSQAMVKIEDMAVSLILEEWGCQNLAR
246	1	REATGLSPQAAQEKDGIVIVKVEEEDEEDHMWGQDSTLQDT
247	1	YGSAFPQGGENRNENEESTSKAETSEDSASRGETTGRSQKE
248	1	FHTGTLQRQASHHIGDFCFQKIEKDIHGFQFQWKEDETNDH
249	1	XXXXXXMSESSSKSSQPLASKQEKDGTEKRGRGRPRKQPPV
250	1	KTDSTIRTENEQACEDMDILKSESYGTVVRISPQDFPQNPG
251	1	GEKPFECRQRLIFEQTPALTKHEWTEALGCDPPLSQDERTH
252	1	AGGAGGGVTEEQEGFADGFVKALDDLHKMNHVTPPNVSLGA
253	1	DSYTATGYGRAPGGLSLHDYKLLKPSLAVNLADPYRSLKAP
254	1	TATGYGRAPGGLSLHDYKLLKPSLAVNLADPYRSLKAPGAR
255	1	VEKDEKLIRLMEEIMSEKENKTIVFVETKRRCDELTRKMRR
256	1	IHGDKSQQERDWVLNEFKHGKAPILIATDVASRGLDVEDVK
257	1	SDEEEEEPPFYHHPFKLSEPKPIFFNLNIAAAKPTPPKSQV
258	1	TSLPQTVVMTSPVTLTSQTTKTDDPQLKREIRLMKNREAAR
259	1	VMTSPVTLTSQTTKTDDPQLKREIRLMKNREAARECRRKKK
260	1	MSSALESVTVSDRPLGVSITKAEVAPEEDERKKRRRERNKI
261	1	RGSPNRSLPSPGVLCGSARPKPYDPPGEKMVAAKVKGEKLD
262	1	PSPGVLCGSARPKPYDPPGEKMVAAKVKGEKLDKKLKKMEQ
263	1	LCGSARPKPYDPPGEKMVAAKVKGEKLDKKLKKMEQNKTAA
264	1	TTAFNLFVGNLNFNKSAPELKTGISDVFAKNDLAVVDVRIG
265	1	AEDLEKALELTGLKVFGNEIKLEKPKGKDSKKERDARTLLA
266	1	LQGPRGSPNARSQPSKTLFVKGLSEDTTEETLKESFDGSVR
267	1	QPSKTLFVKGLSEDTTEETLKESFDGSVRARIVTDRETGSS
268	1	RETGSSKGFGFVDFNSEEDAKAAKEAMEDGEIDGNKVTLDW
269	1	VHRQFAIVFKTPKYKDINITKPASVFVQLRRKSDLETSEPK
270	1	LQKESRACLERIQELEDLLAKEKDNSRRMLTDKEREMAEIR
271	1	SQQMEGPHLPNKKKHKKQAVKTEPEKKSQSTKLSVVHEKKS
272	1	LNPKKARAYGPGIEPTGNMVKKRAEFTVETRSAGQGEVLVY
273	1	SGKNVMVEPHRHEGVFICRGKEDALVTKNLVPGESVYGEKR
274	1	FHSGGNRGRGRGGKRGNQSGKNVMVEPHRHEGVFICRGKED
275	1	KNKNLLLRAQLRHHGLEVVIKNDSNXXXXXXXXXXXXXXXX
276	1	EPKRAVAREESGKPGAHVTVKKLFVGGIKEDTEEHHLRDYF
277	1	EKTLETVPLERKKREKEQFRKLFIGGLSFETTEESLRNYYE
278	1	TCDNCRDADDKHKLITKTEAKQEYLLKDCDLEKREPPLKFI
279	1	PKIIDTGGGFILEEEEEEEQKIGKVVHQPGPVMEFDYVICE
280	1	PPPGGPGGRSEEKISDSEGFKANLSLLRRPGEKTYTQRCRL
281	1	INSCSVRLVDIKKEKPFSNSKVECQAQARTHHNQASDIIVI
282	1	KSKMIYASSKDAIKKKLTGIKHELQANCYEEVKDRCTLAEK
283	1	VCNACGLYYKLHNVNRPLTMKKEGIQTRNRKMSNKSKKSKK
284	1	QRACPATQALEEHQKPPVSIKQERCDPESVISQSHPSPSSE
285	1	HPLNENSEALECRRLSSFIVKENEQQPDHTNRGTTEPLQIS
286	1	ESKKAKKPALVAKSSILLDVKPWDDETDMAKLEECVRSIQA
287	1	GGSSSSGGGRVKKGGGKKSGKKSYLSGGAGAAGGGGADPGN
288	1	GGAGAAGGGGADPGNKKWEQKQVQIKTLEGEFSVTMWSSDE
289	1	ILFPRKPSAPKKGDSSAEELKLATQLTGPVMPVRNVYKKEK
290	1	ECEQALAAEPKAKDPFAHLPKSTFVLDEFKRKYSNEDTLSV
291	1	QKMGESSLRNFRMDIEQSLYKFEGEDYREKQKLGMVEWIEP
292	1	LKDNDTENKDVDDDYETAEKKENELLLGRKNTPKQKEKKIK
293	1	FLPNVLSLKEALQKAREWTAKVEAIQSGSNYAYLEQLESLS
294	1	NTTTAQKRKCSQTQCPRKVIKMESEEGKEARLARSSPEQPR
295	1	RKCSQTQCPRKVIKMESEEGKEARLARSSPEQPRPSTSKAV
296	1	APASEEEFQFLRCQQCQAEAKCPKLLPCLHTLCSGCLEASG
297	1	EETSPLGNARLDTPDINIVLKQDMATEHPQAEVVKQESSMS
298	1	GESTGKKEVAEKSQINLIDKKWKPLQGVGNLAAPNAATSSA
299	1	KRASKSPRKTASQLSENKPVKTEPLRATMAQNENVVVQPVV
300	1	WKPGQKPWKPSYERIQEMKAKTTHLLPIQSTYSLANIKETG
301	1	TLTMDYQGRSTGEAFVQFASKEIAENALGKHKERIGHRYIE
302	1	AAAASSAWKLNFNSPDCLDYKDQASWRFQVLXXXXXXXXXX
303	1	IHYRKTDAKRLHGLDEEAEQKLFSEKRVELLKELSRKPDIY
304	1	LEKEKVKKFLQEFYQDDELGKKQFKYGNQLVRLAHREQVAL
305	1	LAYLQRIALYCHQLNICSKVKAEVQNLGGELVVSGVDSAMS
306	1	IVECLHSFCKTCIVRYLETNKYCPMCDVQVHKTRPLLSIRS
307	1	LEEQQSAQLPQAPPQTSDSVKKEPVLAQPAVSNSGTAASST
308	1	CDRGYKRFTSLKEHIKYRHEKNEDNFSCSLCSYTFAYRTQL
309	1	IIINYSLEQPSQLQVVPQNLKKENPVATNSCKSEKLPEDLT
310	1	QNEKNPNPIESLEKESAFKTKAEPISSSISNMELELNIHNS
311	1	TPNKHGLLQNPYRIPPLFPIKSFVKTKCKKNLLEENFEEHS
312	1	RKAKKRAFQLEEGEETEPDCKYSKKHWKSRENNNNNEKVLD
313	1	EKCEYKKKAKNPKSPKVQAVKDWANQRCSSPKGSARNSLVK
314	1	PSKVTLEARNSSEKLPTELSKEEPSTKNTTADKLAIKLGFS
315	1	PVNQVFGQDEMIDVIGVTKGKGYKGVTSRWHTKKLPRKTHR
316	1	TLRKSLLVQTKRRALEKIDLKFIDTTSKFGHGRFQTMEEKK
317	1	RKRSSRHRGKVKSFPKDDPSKPVHLTAFLGYKAGMTHIVRE
318	1	APGLDPQGAADCAQGVLRQVKNEVGRSGAWKDHWWSAVQPE
319	1	SSEESAPVTTPTMASIPPRIKVEPASEKDPESLRQSAREKE
320	1	RHSVDFKQSRLSEDGLHREGKPINLSHREDLAYMNHIMVSV
321	1	HKNRTNMTYEKMSRALRHYYKLNIIRKEPGQRLLFRFMKTP
322	1	YYKLNIIRKEPGQRLLFRFMKTPDEIMSGRTDRLEHLESQE
323	1	YGRRAKRLQPDPEPTEEDIEKNPELKKLQIYGAGPKMMGLG
324	1	SFTINSLQNPPDAFKAIKTEKLEEPPEDSPPVEEVRTVIRF
325	1	FREDNFNTAMQVLRDAGDLAKGDQKGRKGGTKGPSNVFKIV
326	1	NEGDDFGWGVVVNFSKKSNVKPNSGELDPLYVVEVLLRCSK
327	1	AEGTLSKKLAAIKRKIHPDQKNINAYVVFKEESAATQALKR
328	1	YSPDGKESPSDKKSKTDGSQKTESSTEGKEQEEKSGEDGEK
329	1	SKTDGSQKTESSTEGKEQEEKSGEDGEKDTKDDQTEQEPNM
330	1	NADDPNKDTSENADGQSDENKDDYTIPDEYRIGPYQPNVPV
331	1	REKSESNKRKSNFSNSADDIKSKKKREQSNDIARGFERGLE
332	1	PNSALESCSFARHSLLQTLYKVXXXXXXXXXXXXXXXXXXX
333	1	AAKRRLGSVEAPKTNKSPEAKPLPGKLPKGISAGAVQTAGK
334	1	MQSLPKGTVIVQPEPVLNEDKDDFKGPEFRSRSKMKTENLK
335	1	DDSKSPGKGRKKIRKILKDDKLRTETQNALKEEEERRKRIA
336	1	SRGGGEGNVDETGNNPSVSLKLEESKATSSSNPSSPAPDWY
337	1	EGNVDETGNNPSVSLKLEESKATSSSNPSSPAPDWYKDFVT
338	1	ACNSVFENLEQLLQQNKKKIKVDSEKSNKVYEHTSRFSPKK
339	1	MGQNVADYMRYLMEEDEDAYKKQFSQYIKNSVTPDMMEEMY
340	1	FRYNGLIHRKTVGVEPAADGKGVVVVIKRRSGQRKPATSYV
341	1	LAKSIHHARVLIRQRHIRVRKQVVNIPSFIVRLDSQKHIDF
342	1	DVQINDISLQDYIAVKEKYAKYLPHSAGRYAAKRFRKAQCP
343	1	LDAAVADPDEFERIYEPLDVKSKKIHVVDSGLTFNLPYPLI
344	1	IIPSSPKNAGYKNSLERNNIKQAANNSLLLHLLKSQTIPKP
345	1	KNSKLNSHQKVTLLQLLLGHKNEENVEKNTSPQGVHNDVSK
346	1	ANNHSAPEVLYGSLLNQEELKFSRNDLEFKYPAGHGSASES
347	1	YPAGHGSASESEHRSWARESKSFNVLKQLLLSENCVRDLSP
348	1	LVIEQCKNSRAVTIFIRGGNKMIIEEAKRSLHDALCVIRNL
349	1	LDQEIARPLENENQEFLKSLKEESVEAVKSLETEILESLKS
350	1	CRLKKCLEMGMKMESVQSERKPFDVQREKPSNCAASTEKIY
351	1	XXXXXXMMGHRPVLVLSQNTKRESGRKVQSGNINAAKTIAD
352	1	SNQQKNFKMQSAAFSIAADVKDVKAAQSNENLSDSQQEPPK
353	1	PDAELQRMEQEAERRRQPQIKQEPESEEEEEEKQEKEEKRE
354	1	GPLKGKGQGATTADGKGKEKKAPPLLEGAPLRLKPRSIHEL
355	1	EHGQEIFQKKVSPPGPALNVKLQPVETKAHFDSSEPQLLWD
356	1	IHFFRHREQKEKTGEEINFGKLITKPSEGTTLRVEDLVKQY
357	1	SRNSKTAVSASRNMSIIDAFKSTRQQPSRNVTTKNYSEVIE
358	1	PAPPKPEPGEAPGASQCMPLKLRFKRRWSEDCRLEGGGGPA
359	1	AVYSCPFDGMITETKGTVLIKTAEELMNFSKGEENLMDAQV
360	1	EDTDTWLKYYDCDKYKESYKKSQIIIYHRNRLGEKLYECSE
361	1	SWIIKDDAEVERLTCEEEEEKMFGRGSRHRKEVDYSDSLTE
362	1	CAVVEFKMEESMKKAAEVLNKHSLSGRPLKVKEDPDGEHAR
363	1	NGQLLFDRPMHVKMDERALPKGDFFPPERPQQLPHGLGGIG
364	1	KFNECGHVLYADIKMENGKSKGCGVVKFESPEVAERACRMM
365	1	VVKFESPEVAERACRMMNGMKLSGREIDVRIDRNAXXXXXX
366	1	VQRPGPYDRPGTARRYIGIVKQAGLERMRPGAYSTGYGGYE
367	1	IVKNCTVSKEPHPSEKPFTCKEEQKNFQATLGGCQQKAIHS
368	1	XMTLVTAGGAWTGPGCWHEVKDEESSSEQSISIAVSHVNTS
369	1	HTGIGRIPCSSCPQTFGTNSKLRLHRLRVHDKTPTHFCPLC
370	1	IDGSESVAGTGMIGENEQEKKMQIVLQGHATRVTAKSQQSG
371	1	PYVCTVPGCDKRFTEYSSLYKHHVVHTHSKPYNCNHCGKTY
372	1	ALTTPTHYKLTPRPATRVRPKALQTTGTAKSHLFDGLDDDE
373	1	RVKDFFKNAPAGQETQRGGSKSLLPDFLQTPKEVVCTTQNT
374	1	GQETQRGGSKSLLPDFLQTPKEVVCTTQNTPTVKKSRDTAL
375	1	TVLNGNLKVDFMETENSSSVKKQKALVAKVSQREEMVKKCL
376	1	SSGSKAKGGSATCRKISSKTKSSSIIGSSSASHTSQATSGA
377	1	SIIGSSSASHTSQATSGANSKLGIMAPPKPINRPFLKPSYA
378	1	GFSATRKNLFERPLFNTHLQKSFVSSNWAETPRLGKKNESS
379	1	EDIMHNLAASKSSTAAYQPIKEGRPIKSVSERLSSAKTDCL
380	1	LAASKSSTAAYQPIKEGRPIKSVSERLSSAKTDCLPVSSTA
381	1	YQPIKEGRPIKSVSERLSSAKTDCLPVSSTAQNINFSESIQ
382	1	SDNNVSVTNVSVAKTPVLRNKDVNVTEDFSFSEPLPNTTNQ
383	1	FSFSEPLPNTTNQQRVKDFFKNAPAGQETQRGGSKSLLPDF
384	1	AHHPLHSVPLPAQEDYYSHLKKESDKPLXXXXXXXXXXXXX
385	1	AEEVFERIFGDPNSHMPFKSKLLMIISQKDTFHSFFQHFSY
386	1	LRTLSSVHSEQVFALRLQDKKLPPLLSEIWDVHEXXXXXXX
387	1	XXXMASGADSKGDDLSTAILKQKNRPNRLIVDEAINEDNSV
388	1	AKRMAEERRKYTLKIVEEETKKELEENKRSLAALDALNTDD
389	1	FLQKYYHRGAFFMDEDEEVYKRDFSAPTLEDHFNKTILPKV
390	1	EDEEVYKRDFSAPTLEDHFNKTILPKVMQVKNFGRSGRTKY
391	1	VDQDTTSFDSAWGQESAQNTKFFKQKAAGVRDVFERPSAKK
392	1	EFLTCNIPTSNASNNMVTTEKVENGQEPVIKLENRQEARPE
393	1	NASNNMVTTEKVENGQEPVIKLENRQEARPEPARLKPPVHY
394	1	DAAMKAMTILLEEAKAKDSGKSEESSHYSTEKESEKTAESQ
395	1	QAAQPKGNPVAAPTGDDLQSKTNKFILNQEPLEEAETLAVS
396	1	FQQKSRQKDQCENPIQVRVKKEETNFSHRTGKDSEVSGSNS
397	1	NFSHRTGKDSEVSGSNSLDLKHVTYLRVSGRKESLKHGCGK
398	1	YMGASCHACIGGTNVRAEVQKLQMEAPHIIVGTPGRVFDML
399	1	LPTNRENYIHRIGRGGRFGRKGVAINMVTEEDKRTLRDIET
400	1	GRGGRFGRKGVAINMVTEEDKRTLRDIETFYNTSIEEMPLN
401	1	MELHGEGSSSGKATGDETGAKVERADGYEPPVQESVXXXXX
402	1	KKILERKAKSRQVGKEKGKYKEETIEKMQEXXXXXXXXXXX
403	1	FDCELRLLIHQSLAGGIIGVKGAKIKELRENTQTTIKLFQE
404	1	PDRVVECIKIILDLISESPIKGRAQPYDPNFYDETYDYGGF
405	1	ETNGEFGKRPAEDMEEEQAFKRSRNTDEMVELRILLQSKNA
406	1	GPIITTQVTIPKDLAGSIIGKGGQRIKQIRHESGASIKIDE
407	1	IIGKGGQRIKQIRHESGASIKIDEPLEGSEDRIITITGTQD
408	1	DEMVELRILLQSKNAGAVIGKGGKNIKALRTDYNASVSVPD
409	1	EIEVGGGRKAIIIFVPVPQLKSFQKIQVRLVRELEKKFSGK
410	1	DERKKNAKISSLLEEQFQQGKLLACIASRPGQCGRADGYVL
411	1	PRQYKIPDWFLNRQKDVKDGKYSQVLANGLDNKLREDLERL
412	1	RYFILPDSLPLDTLLVDVEPKVKSKKREAVAGRGRGRGRGR
413	1	ETKQEKKQRLLARAEKKAAGKGDVPTKRPPVLRAGVNTVTT
414	1	XMPKGKKAKGKKVAPAPAVVKKQEAKKVVNPLFEKRPKNFG
415	1	VNPLFEKRPKNFGIGQDIQPKRDLTRFVKWPRYIRLQRQRA
416	1	PPAINQFTQALDRQTATQLLKLAHKYRPETKQEKKQRLLAR
417	1	NRLSVLGAITSVQQRLKLYNKVPPNGLVVYCGTIVTEEGKE
418	1	VKDANGNSFATRLSNIFVIGKGNKPWISLPRGKGIRLTIAE
419	1	RRGGVKRISGLIYEETRGVLKVFLENVIRDAVTYTEHAKRK
420	1	TYTEHAKRKTVTAMDVVYALKRQGRTLYGFGGXXXXXXXXX
421	1	KAKSIVFHRKKNLQYYDISAKSNYNFEKPFLWLARKLIGDP
422	1	KLVKKLAKKYDAFLASESLIKQIPRILGPGLNKAGKFPSLL
423	1	LGRPGFSIADKKRRTGCIGAKHRISKEEAMRWFQQKYDGII
424	1	RLTRAAKVLEQLTGQTPVFSKARYTVRSFGIRRNEKIAVHC
425	1	HRKGAARLRAVDFAERHGYIKGIVKDIIHDPGRGAPLAKVV
426	1	ERANGMELDGRRIRVDFSITKRPHTPTPGIYMGRPTYGSSR
427	1	XXXXXMSDQEAKPSTEDLGDKKEGEYIKLKVIGQDSSEIHF
428	1	VIGQDSSEIHFKVKMTTHLKKLKESYCQRQGVPMNSLRFLF
429	1	NRIIGAKDHASIQMNVAEVDKVTGRFNGQFKTYAICGAIRR
430	1	IHPMAYQLQLQAASNFKSPVKTIRXXXXXXXXXXXXXXXXX
431	1	SFDSPERKRIKYSRETDSDRKLVDKEDIDTSSKGGCVQQAT
432	1	KEDIDTSSKGGCVQQATGWRKGTGLGYGHPGLASSEEAEGR
433	1	DQDKSQLSGREEQSSDAGLFKEEGGLDFLGRQDTDYRSMEY
434	1	PSEEKPSRLIRLSGVPEDATKEEILNAFRTPDGMPVKNLQL
435	1	IGGHRSSCSFCKNPREVTEAKQELITYPQPQKTSIPAPLEK
436	1	DGKEKKDRGVTRFQENASEGKAPAEDVFKKPLPPTVKKEES
437	1	ASEGKAPAEDVFKKPLPPTVKKEESPPPPKVVNPLIGLLGE
438	1	VTDADRSILSPGGSCGPIKVKTEPTEDSGISLEMAAVTVKE
439	1	DPEVEVTIEDDDYSPPSKRPKANELPQPPVPEPANAGKRKV
440	1	KRPKANELPQPPVPEPANAGKRKVREFNFEKWNARITDLRK
441	1	PPVPEPANAGKRKVREFNFEKWNARITDLRKQVEELFERKY
442	1	DLRKQVEELFERKYAQAIKAKGPVTIPYPLFQSHVEDLYVE
443	1	GLPENIPFRSPSWYGIPRLEKIIQVGNRIKFVIKRPELLTH
444	1	KINTKALQSPKRPRSPGSNSKVPEIEVTVEGPNNNNPQTSA
445	1	VNTRKDFQKDFVKYCVEEEEKAAEMHKMKSTTQANRMSVDA
446	1	LNIIQVTIPDDDNERLSKVEKARQLREQVNDLFSRKFGEAI
447	1	LSKVEKARQLREQVNDLFSRKFGEAIGMGFPVKVPYRKITI
448	1	FQKDFVKYCVEEEEKAAEMHKMKSTTQANRMSVDAVEIETL
449	1	KDFVKYCVEEEEKAAEMHKMKSTTQANRMSVDAVEIETLRK
450	1	IQEGAEPFPVGCSQLLKESEKPLQTGLPTGLTENQSGGPLG
451	1	TKSDMMEENIDTSAQAVAETKQEAVVEEDYNENAKNGEAKI
452	1	PDAPAPDPERIQRLRRLMVAKEEGDGAAGAGRRGPGRSRKA
453	1	MAAAKAPTKAAPKQKIVKPVKVSAPRVGGKRXXXXXXXXXX
454	1	LLENIKRKVTSVSTLKSEDIKIRQDSVTKLLTDVQLMKGKQ
455	1	ASPGGSIDERPLSSSPLVRVKEEPPSPPQSPRVEEASPGRP
456	1	GVKRPREDHGRGYFEYIEENKYSRAKSPQPPVEEEDEHFDD
457	1	QMADTGKLNTLLQRAPQCLGKFIEIAARKKRNFILDQTNVS
458	1	QRRKMCLFAGFQRKAVVVCPKDEDYKQRTQKKAEVEGKDLP
459	1	VCPKDEDYKQRTQKKAEVEGKDLPEHAVLKMKGNFTLPEVA
460	1	QRTQKKAEVEGKDLPEHAVLKMKGNFTLPEVAECFDEITYV
461	1	GYKNQSQGYNQWQQGQFWGQKPWSQHYHQGYYXXXXXXXXX
462	1	RFPSTNIKITFTALSSEKREKQEASESPVKAVQPHISPLTI
463	1	VLAPPKAEAQENGDHREVKVKVEPIPAIGHATLGTASRIIQ
464	1	SVRMMLEEQVRSLEAHMYPEKLKVIAQQVQLQQQQEQVRLL
465	1	RMMLEEQVRSLEAHMYPEKLKVIAQQVQLQQQQEQVRLLHQ
466	1	XXMAPPSTREPRVLSATSATKSDGEMVLPGFPDADSFVKFA
467	1	KDPEPPEKEFTPYDYSQSDFKAFAGNSKSKVSSQFDPNKQT
468	1	ISGQKLEIERLEKKNKTLEYKIEILEKTTTIYEEDKRNLQQ
469	1	PPIRLRHRRSRSAGDRWVDHKPASNMQTETVMQPHVPHAIT
470	1	MQPHVPHAITVSVANEKALAKCEKYMLTHQELASDGEIETK
471	1	LPHEELFCSQIWQQITRELIKYQDSVVNIQRTGCQLEKRDD
472	1	SAGIQLHPGENADSPADIRIKEEEPDPEEWQLSGDSTLNTN
473	1	IKFPLPHRVLRRQHKPRFTTKRPNTFFXXXXXXXXXXXXXX
474	1	QARFILEKIQGKITIENRSKKDLIQMLVQRGYESDPVKAWK
475	1	DKVESQEREDVLAGMSGKAIKGKVGKPKVKKLQLEETMPSP
476	1	ADASKKLLKKKKGDLDTAAVKVEFDEEFSGAPVEGAGEEAL
477	1	PKREKKEPGTRVRKTPTSSGKPSAKKVKKRNPWSDDESKSE
478	1	EDDDADDDDDDNNDLEELKVKASPITNDGEDEFVPSDGLDK
479	1	NGKKLPVNGFRSYVDLYVKDKLDETGVALKVIHELANERWD
480	1	DRRQRRLHGLPEQFLYGTATKHLTYNDFINKELILFSNSDN
481	1	GSQSPRNVEERMNGSHFKDEKALVTSQNSDLLDDEEVEDEV
482	1	LHEGNPEDDYEETSALEMSCKTSPVRYKEEEYKSGLSALDH
483	1	TSALEMSCKTSPVRYKEEEYKSGLSALDHIRHFTDSLKMRK
484	1	NQYSEAELSSFSTSHVPEELKQPLHRKSKSQAYAMMLSLSD
485	1	KFPCSTPHSAFSMVEEDFQQKLESENDLQEIHTIQECKECD
486	1	KSQSPLMTHPQILPATQDILKALSKHPSVGDNKPVELQPER
487	1	LRSLPLKMEPQSPGEVKKLQKGSSESPFDLTTKRKDEKPLT
488	1	EVKKLQKGSSESPFDLTTKRKDEKPLTPVPSKPPVTPATSQ
489	1	KLQKGSSESPFDLTTKRKDEKPLTPVPSKPPVTPATSQDQP
490	1	SPFDLTTKRKDEKPLTPVPSKPPVTPATSQDQPLDLSMGSR
491	1	RSRASGTKLTEPRKNHVFGGKKGSNVESRPASDGSLQHARP
492	1	LQHARPTPFFMDPIYRVEKRKLTDPLEALKEKYLRPSPGFL
493	1	FMDPIYRVEKRKLTDPLEALKEKYLRPSPGFLFHPQMSAIE
494	1	FVVEPSEATNRSVQAHEVHQKILATDVSSKNTPDSKKISSR
495	1	HEVHQKILATDVSSKNTPDSKKISSRNINDHHSEADEEFYL
496	1	IEIDNKVSDEEDKTSEGQERKPSGSSQNRIRDSEYEIQRQA
497	1	KQRRKFMAKPAEEQLDVGQSKDENIHTSHITQDEFQRNSDR
498	1	SASGSVSIEEIDLEGKFVQLKNNSDKDQSLGNWRIKRQVLE
499	1	QLVSLKRKRPLLLNTNGAQKKNLFQHIVKEPTDNHHHKVPH
500	1	VKEPTDNHHHKVPHSRTEGLKPRERISDDIIIYDVTDDNAD
501	1	QEIATYRRLLEGEDAHLTQYKKEPVTTRQVRTIVEEVQDGK
502	1	LNSQSLAADQLLKLMSTVDPKLNHVAAGLVSPSLKSDTSSK
503	1	DGLSDDKKPFKCFTPKGSSLKIEERAEFLNKSVQKSSGVKS
504	1	KLKERVLIPVKQYPKFNFVGKILGPQGNTIKRLQEETGAKI
505	1	SYKASSGLLYPLERGFIYVHKPPVHIRFDEISFVNFARGTT
506	1	QNEIILRAVCALLNSGGGIIKAEIENKGYNYERHGVGLDVP
507	1	RESTQLSPADLTEGKPTDPSKLESPSFTGTGDTEIAHATED
508	1	LENNGSKKDGVCGPPPSKKMKLFGFKEDPFVFIPEDDPLFP
509	1	EKLARQHKRRSDDDDRSSDRKDGVLEEQIERLQEKVESAQS
510	1	DSQLSASSRSESGRMKKSDNKMGITPLRNYHPIVVPGLGRS
511	1	TAVPGPLGIEDISPNLSPDDKSFSRVVPRVPDSTRRTDVGA
512	1	HDPILGSGKGDSGAAPDVDDKLCLRMKLVSPETEASEESLQ
513	1	EDGEEKSPSKKKKKIQKKEEKAEPPQAMNALMRLNQLKPGL
514	1	QETFNKNFVCNVCESPFLSIKDLTKHLSIHAEEWPFKCEFC
515	1	SISTTEAVSFHKEKSVYLSSKLKQLLQTQDKLTPAGISATE
516	1	SVLDLSVHKKHCSDSEGKEFKESHSVQPTCSAVKKRKPTTC
517	1	PTAEADKSAAEKRRQLIQESKFLGGDMEHTHLVKGLDFALL
518	1	RERERDREREEEKKRHSYFEKPKVDDEPMDVDKGPGSTKEL
519	1	ETNDKAELDRQWKKISAIIEKRKKMEADGVEVKRPKYXXXX
520	1	HSSKTTSLEQCNIVQPPPPCKIENSIPNPNGTESGTYFTSF
521	1	PTHVPKENFRKHSQPRSFDLKTYKPMGFESSFLKFIQESEE
522	1	GILHAPDAGWGNLVYVVNYPKDNKRKMDETDASSAVKVKRA
523	1	VNYPKDNKRKMDETDASSAVKVKRAVQKTSDLIVLGLPWKT
524	1	ADKAAVVKFHPIQGHRVEVKKAVPKEDIYSGGGGGGSRSSR
525	1	EADAAMAASPHAVDGNTVELKRAVSREDSARPGAHAKVKKL
526	1	GAAGDGTVVDCPVCKQQCFSKDIVENYFMRDSGSKAATDAQ
527	1	QYQFLEDAVRNQRKLLASLVKRLGDKHATLQKSTKEVRSSI
528	1	VSDVQKRVQVDVKMAILQIMKELNKRGRVLVNDAQKVTEGQ
529	1	ILQIMKELNKRGRVLVNDAQKVTEGQQERLERQHWTMTKIQ
530	1	SSPEEATKAVTEMNGRIVGSKPLYVALAQRKEERKAHLTNQ
531	1	AVRKPLEAVLRYLETHPRPPKPDPVKSVSSVLSSLTPAKVA
532	1	MRVSSGERWIKGDKSELNEIKENQRSPVRVKERKITDHRNV
533	1	ASTNSSVLGADLPSSMKEKAKAETEKAGKTGNSMPHPATGK
534	1	PTSSPAKGPPQKAGPVAVQVKAEKPMDNSESSEESSDSADS
535	1	SADSEEAPAAMTAAQAKPALKIPQTKACPKKTNTTASAKVA
536	1	KTGLAVTVGQAKSVGKGLQVKAASVPVKGSLGQGTAPVLPG
537	1	VGQAKSVGKGLQVKAASVPVKGSLGQGTAPVLPGKTGPTVT
538	1	MDDPSVGPKIPQALEKILQLKESRQEEMNSQQEEEEMETDA
539	1	PDVVEMHDVTAQDPKLLVHLKATRNSVPVPRHWCFKRKYLQ
540	1	QKAREEEEQKEGGDGAAGDPKKEKKSLDSDESEDEEDDYQQ
541	1	VIYARLWRWPDLHKNELKHVKYCQYAFDLKCDSVCVNPYHY
542	1	PHLKIPKCAATTCVQSLGQGKSDVVGSLALQSVGESRLWQG
543	1	SLGILKDYPHSAFTLEKKVIKTEPEDSRXXXXXXXXXXXXX
544	1	GNRSSTRSSSTKGKLELVDNKITTKKRSKSRSKERTRHRSD
545	1	EVQYTFDLQLAQEDAKKMAVKEEKYDPGYEAAYGGAYGENP
546	1	KIKYDAIARQGQSKDKVIYSKYTDLVPKEVMNADDPDLQRP
547	1	KRLAADGRGLQTVHINENFAKLAEALYIADRKAREAVEMRA
548	1	VYDQAWRGGKDMAQSIYRPSKNLDKDMYGDDLEARIKTNRF
549	1	GGAFPEIHVAQYPLDMGRKKKMSNALAIQVDSEGKIKYDAI
550	1	GRKKKMSNALAIQVDSEGKIKYDAIARQGQSKDKVIYSKYT
551	1	KVKKAKNKKLGALTAEEIALKMEADEKKKKKKKXXXXXXXX
552	1	CEMEKYLTPQLPPVPIIPEHKKYRRDSASVVDQFFTDTEGL
553	1	EITDKKKAGKLDRGAASRFVKNALWEPKSKNASKVANKGKS
554	1	TKEPVKKIFVGGLSPDTPEEKIREYFGGFGEVESIELPMDN
555	1	EHSLFSTEQKLLAELDAIIGKKGTRIIIWNLRSYKNATEFD
556	1	FTDQIKVLQQRILEMNDKYVKKETCHQSTETDAVFLLESIN
557	1	ACNEVPPAPKESSTSEGADQKMSSFKEEKDIKPIIKDEKGR
558	1	KKEEKKPEDIKKEEKDQDELKPGPTNRSRVTKSGSRGMERT
559	1	TSRSKERSSKSQDRKSESKEKRDILSFDKIKEQRERERQRQ
560	1	RNLDTGGNKSVLMERLKKAVKEEGQDPDEIGIELEATSKKS
561	1	FIIYRNLEILDDTVQRFAINKEEEILLSDMNKQLTSISEEV
562	1	DTVQRFAINKEEEILLSDMNKQLTSISEEVMDLAKHLPHAF
563	1	KMTCAHCRTPLQKGQTAYQRKGLPQLFCSSSCLTTFSKKPS
564	1	QTKVENSNTVRTPEENGNLGKIPVKTRSAPTAPTPPPPPPP
565	1	PRKNKAAMCKPLMQNRGVSCKVEMKSKGSQTEEWKPQVIVL
566	1	PNLDSPNVSSTLKPPSNNAIKREKEKPPLPKILSKSESAIS
567	1	CSPIIMPYKAAHSRNSMDRPKLFVTPPEGSSRRRIIHGTAS
568	1	FVTPPEGSSRRRIIHGTASYKKERERENVLFLTSGTRRAVS
569	1	IVQASQAEKNRAAAMANNLQKGSAGPMRLYVGSLHFNITED
570	1	PYDKNAIKVNNVNGNQVGHLKKELAGALAYIMDNKLAQIEG
571	1	KRWKREECEGHNGCYDEKTFKYDQFDESSVESLFHQQILSS
572	1	FVCNECGKAFTYRSNFVLHNKSHNEKKPFACSECGKGFYES
573	1	CGKAFTYRSNFVLHNKSHNEKKPFACSECGKGFYESTALIQ
574	1	CIKRQRAAGNPGSLAAPIDHKPCSAPLEPKSQASRNQRWGA
575	1	IPEPASPQLLETPIHASQIQKVEPAGRSRFTPELQPKASQS
576	1	RKSQLPAEGDAGAEWAAAVLKQERAHEVGAQGGPPVAQVEQ
577	1	ARGRLERQKILDQSEAEKARKELLELEALSMAVESTGTAKA
578	1	ESEGSKAAHGGHSGGGSEGHKLPLSSPIFPGLYSGSLCNSG
579	1	EQETLISQKSIPEPLPAADMKKKIEGYQEFSAKPLASRVDP
580	1	HVQSFRSKPSEERKTINDIFKHEKLSRSDPHRCSFSKHHLN
581	1	PHRCSFSKHHLNPLADSYVLKQEIQEGKDKLLEKRALPHSH
582	1	SNGRRKRSPTQSFRFLPVICKEEPLPDSSLRGFPSASATPF
583	1	DHPTDKKGNRKKRAVDTKKTKLESLSQVGPVNENVMEEDLK
584	1	MDFPGESSNNRSFFSVESGTKMSGLHISGGQSVLEPIKSVN
585	1	AGTTKNSSNKPAVTTKSPAVKPAAAPKQPVGGGQKLLTRKA
586	1	SSNKPAVTTKSPAVKPAAAPKQPVGGGQKLLTRKADSSSSE
587	1	KKRKQNEAAKEAETPQAKKIKLQTPNTFPKRKKGEKRASSP
588	1	ASSLLDIYSFWLKSAKVPERKLQANGPVAKKAKKKASSSDS
589	1	FWLKSAKVPERKLQANGPVAKKAKKKASSSDSEDSSEEEEE
590	1	RKTRSARRRTTQIINITMTKKLDVEEPDSANSSFYSTRSAP
591	1	KDFEIDFEDDIDFDVYFRKTKAATILTKSTLENQNWRATTL
592	1	NKMSVVTESSRNYGYNPSPVKPEGLRRPPSKTSMHQSRRLM
593	1	RGSGKKRKFQPLFGDFAAEKKNQLELLRVMNSKKPQLDVTR
594	1	FFGKAAMNKFKVNLDSEQAVKEEKIVEQPTVSVTEPKLATP
595	1	VVCRDGQVHLFEHILNGYCKKPLTSNCTIQIATPGKGKKST
596	1	VFIEFCVEDSKDVNVNFEKSKLTFSCLGGSDNFKHLNEIDL
597	1	DNFKHLNEIDLFHCIDPNDSKHKRTDRSILCCLRKGESGQS
598	1	VFGQVERAVVIVDDRGRPSGKGIVEFSGKPAARKALDRCSE
599	1	VVIVDDRGRPSGKGIVEFSGKPAARKALDRCSEGSFLLTTF
600	1	QLDDEEGLPEKLVIKNQQFHKEREQPPRFAQPGSFEYEYAM
601	1	REEEMRRQQEEMMRRQQEGFKGTFPDAREQEIRMGQMAMGG
602	1	IGGTPPAFNRAAPGAEFAPNKRRRYXXXXXXXXXXXXXXXX
603	1	XXXXXXMDLSGVKKKSLLGVKENNKKSSTRAPSPTKRKDRS
604	1	PILKVQYHPRDQNKVLVCPMKSAPVMLTLSDSKHVVLPVDD
605	1	KVTQEPRAKKGRRNQSVEPKKEEPEPETEAVSSSQEIPTMP
606	1	PMTPRSANAFLTPSYTWTPLKTEVDESQATKEILAQKCKTY
607	1	DADNLQESLSDSRELVEGEMKELPEQLQEHAIEDKETINNL
608	1	CINHLHKTELHGKMISVEKAKNEPVGKKTSDKRDSDGKKEK
609	1	KRDSDGKKEKSSNSDRSTNLKRDDKCDRKDDAKKGDDGSGE
610	1	AAIPKVMQQQQQTTQQQLPQKVQAQVIQETIVPKEPPPEFE
611	1	LESHLDDAEPYLLTMAKKALKSESAASSTGKEDKQPAPGPV
612	1	KLDQKDLVLPTQALPASPALKNKRPRKDENESSAPADGEGG
613	1	LVLPTQALPASPALKNKRPRKDENESSAPADGEGGSELQPK
614	1	KPTVLNQPLPGEKNPKVPKGKWNSSNGVEEKETWVEEDELF
615	1	EKRKKRRQELARLRDSGLSQKEEEEDTFIEEQQLEEEKLLE
616	1	LLLAPSDVAGWGIFIKDPVQKNEFISEYCGEIISQDEADRR
617	1	NPHIIATKTPSSDVLVFDYTKHPAKPDPSGECNPDLRLRGH
618	1	PWNSFLPPPPPMPGPRLGPGKPGLKFNGPPPPPPPPPPHLL
619	1	SDGEDEQQVPKGPIHSPVELKHVHATVVKVPEVNSSALPHK
620	1	HQKELSGKTQNSFKTGVVEMKDSGYKVSDPENLYLKQGIAN
621	1	SGKTQNSFKTGVVEMKDSGYKVSDPENLYLKQGIANLSAEV
622	1	PENLYLKQGIANLSAEVVSLKRLIATQPISASDSGXXXXXX
623	1	KGLIRSASVTPKINQLCSQTKGSFVNGVFEVHKKNVRGEFT
624	1	XXXXMATALVSAHSLAPLNLKKEGLRVVREDHYSTWEQGFK
625	1	LSPDSAILKLKAAANAVLQDKSLTRTEETMRFESFSSPFSS
626	1	PPPPQSLELLLLPVPKGRVSKPSNSASEEESGKPFQCPICG
627	1	FSLKLHMRCHQHFLRTEAKVKEEIPDPDVKGSPHLSDSACL
628	1	HQHFLRTEAKVKEEIPDPDVKGSPHLSDSACLGQQREGGGT
629	1	PESEVSAPGVSEDALKPQEGKGSVLRRDVSVKAASELLMKL
630	1	SHVSISPSRNVGYSTLIGREKTEPLQKMPEGRVPPERNLFS
631	1	PSRNVGYSTLIGREKTEPLQKMPEGRVPPERNLFSQDISVK
632	1	KELLPSDSVLHGRISAPETEKIVLEAGNGLPSWKFNDQLFP
633	1	HVEPETTLPARRTEKSPSLRKQVFGHLEFLSGEKKNKKSPL
634	1	YIPISDDPKASAKKKMKSKKKVEQPVIEEPALKRKKKKKRK
635	1	RAMSWKYSRGAGLGFSTAPNKIFYIDRNASKSVKLEDXXXX
636	1	ENPCTDTGDKTLPFLHNIKIKVEDSSANEEYEPHLFTNKLK
637	1	PQEAYNAVHVSGSPTALAAVKLEDDKEKMVGTTSVVKNSHE
638	1	NAVHVSGSPTALAAVKLEDDKEKMVGTTSVVKNSHEEVVQT
639	1	QDGHYIISASSDGTVKIWNMKTTECSNTFKSLGSTAGTDIT
640	1	AINDLLEAIYPSVDKREYIIKLEPIETNQNAVFQYISRTDN
641	1	ELKKYIETRKNPNQSSKGRSKNVLVPLSRSCPVCCKSFATK
642	1	ETLKDVKKELTYQNTDLSEIKEEEQVKSTDRKSAVEAQNEV
643	1	PKLLTVCKPFDLHASPHASIKREKILADIEADEENLKETRW
644	1	SLPASPRARLSASTASELSPKSKARPSSPSTSWHRPASPCP
645	1	EERSRPNSGDEKRKLSLSEGKVKKNMGEGKKRVSSGSSERG
646	1	LTIPESSTVKGMMAGPMAAFKWQPTASEPVKDADPHFHHFL
647	1	GMMAGPMAAFKWQPTASEPVKDADPHFHHFLLSQTEKPAVC
648	1	FLLSQTEKPAVCYQAITKKLKICEEETGSTSIQAADSTAVN
649	1	TSIQAADSTAVNGSITPTDKKIGFLGLGLMGSGIVSNLLKM
650	1	IVSNLLKMGHTVTVWNRTAEKCDLFIQEGARLGRTPAEVVS
651	1	PEKVVNKQCKECENVKEIKVKEENETEIKEIKMEEERNIIP
652	1	EEERNIIPREEKPIEDEIERKENIKPSLGSKKNLLESIPTH
653	1	AAETSAISQDLEGVPPSKKMKLEASQQNSEEMXXXXXXXXX
654	1	RDQALSNAQAKVVKLEEELKKKQVYVDKVEKMQQALVQLQA
655	1	LDEMTATRALINMSSLPAQDKIRSRDASEDKSAEKRKKDKQ
656	1	VPVRRSLKELIPDTSRRYENKAGSFITGIDVTSKEAIEKKE
657	1	MQQILEEAEPQGQLQEAFQGKRPLFSKCGSTHEDRVEKQSG
658	1	PKSEDRRYCNSHLQVLGFIPKKERKKKNDPIDEVKVRHQMD
659	1	TNVTVAAARGIKRKMMQPFNKPSGTFIKKPKLAKPMEKISL
660	1	EQIKRESVLTATSILNNPIVKARYERFVKGENPFEIQDHSQ
661	1	LTATSILNNPIVKARYERFVKGENPFEIQDHSQDQQIEGDE
662	1	GEIESDNVEVKKESSQMESVKEEKPTEIKLEETSVERQILH
663	1	PVAPQRGQAEVRAKAGQARVKQESVGVFACKNKWQPDDVTE
664	1	QKFISHSSSVSPLQRIYSGVKTHIFNKHRNDFVDFPLLSQE
665	1	HIFNKHRNDFVDFPLLSQEQKAHIRRKPYECNEQGKVFRVS
666	1	LSIISMMKQRTEPWTVENEMKVAKNPDRWEGIKDINTGRSC
667	1	LNGTGCRSEDQNCVPPLQERKVTPIDSPPVWSPEGYMALQS
668	1	ELQDTSLQQLVSQRHSTPQNKNAVSVHSNLNSEAVMKSLTQ
669	1	NEDEFSDEEDFLNSTKAKLLKLTSSSIDPGLSIKQLGGLYI
670	1	IDPGLSIKQLGGLYINFNADKLQSNKRTLTQIKEKKKNELL
671	1	LQKKRRKERQKTAGDGWFGMKAPEMTNELKNDLKALKMRAS
672	1	QKTAGDGWFGMKAPEMTNELKNDLKALKMRASMDPKRFYKK
673	1	PQKSRNRKNRSSAVDPEPQVKLEDVLPLAFTRLCEPKEASY
674	1	TVNSTRETPPKSKLAEGEEEKPEPDISSEESVSTVEEQENE
675	1	RNRRFRLAAFADALEFADEEKESPVEFTGHKLIGVYTDFAF
676	1	TIQGHGLLGPPKSERGRKKIKAENPGGPPVLVVPYPILASG
677	1	DYVHELSLEMKRQKIQRELMKLEQENMEKREEIIIKKEVSP
678	1	QRELMKLEQENMEKREEIIIKKEVSPEVVRSKLSPSPSLRK
679	1	QGKGLGRKENGITQALRVTLKQDTHGVGHDPAKEFTNHWWN
680	1	TKSLSNTQLASMANLRAEKNKVEKPSPSTTNPHMNQSSNYL
681	1	ATTPSYKKPLYGISHKIMEKKNPPSGDLLNVYELFEKANAS
682	1	XMNSTEFTEDVEEVLKSITVKVETEAEDAALDCSVNSRTSE
683	1	VETEAEDAALDCSVNSRTSEKHSVDSVLTALQDSSKRKQLV
684	1	DPPRDDCYDSSSLPDDISVVKVEDSFEGERPGRRSKKIWLV
685	1	TSEKHSVDSVLTALQDSSKRKQLVSDGLLDSVPGVKRRRLI
686	1	FREEFEGPPLPPERSSKDFCKIPLDELVVPSPDFPVPSPYL
687	1	DNENNIASNQSRSPPAVVEEKWKPQAQRNSANNTTTSGLTP
688	1	VKCGLDKETPNQKTGHNLQVKNEDKGTKAWTPSCLRGRADP
689	1	EKEKDKETGRETKYPWKEFLKEEEADPYKFKIKEFEDVDPK
690	1	KQTIKNGDSQHSASSANVFPKESPTQISIGAFPSTKISEAP
691	1	PPASELNLQQDQKTQPIPVLKVESRLDSDQQHNLQEHSTTS
692	1	FAECAESSLPPSAKLRRNALKEIVKRTETKSSVTSKSQTRR
693	1	PPSAKLRRNALKEIVKRTETKSSVTSKSQTRRDTVETSSDS
694	1	VCLLLKETIDSRVQEYLEVRKQHRPSNAEFTRSNPLSLKGY
695	1	KKTLSQGESQTSEHELFLDTKIFEKDQGSTYSGDLESEAVS
696	1	TRTLKYSTKMTYLRFFPPLQKQESEPDKLTVGKRKRNEDDE
697	1	KRLDKPHKDLDSRLKSSFFDKAANQVEETLHTHLPQTPETN
698	1	AVALDSQIDAPLEVEGCLIMKVEKDPEWASEPILEGSDSSE
699	1	SYRKSVHQIPAQRDLYRDFRKENVGNVVSLGSAVSTSNKIT
700	1	WENLQGIRQGKPMSQPRDLGKAVVHQRPFVGKRPYRLLKYG
701	1	PMSQPRDLGKAVVHQRPFVGKRPYRLLKYGESFGRSTRLMC
702	1	ARQSIIRKVVDPETGRTRLIKGDGEVLEEIVTKERHREINK
703	1	KYEKVHHFGEDDDEVPPGNPKPQLPIGAIPSSYNYQQHSVS
704	1	LLAGLKQDEPGQAGSQKSSTKQPTVGGTSSTPRAQKAIVNH
705	1	MNFTDLLRLAEKKQFEPVEIKVVKKSEERPMTAEELREREF
706	1	FVKNCKFHMSHEPFIFHEVGKDFLSSLRLLQQEDIHTSGKS
707	1	SLRLLQQEDIHTSGKSNFETKHGIPLQGGKTHYICGESTIP
708	1	PLQGGKTHYICGESTIPFSNKHSLVLHQRLLPREGPYVCSD
709	1	SASSLQKDNVPSNQIIGGEQKEPESRDALPFLLDDLMPANE
710	1	SDRSIEKNTQVLKKMNKTQTKSEDQSHVVQEHLSEEKDERL
711	1	EKDERLHCENNDKAPESESEKPTPLSTGQGNRAEEGPNASS
712	1	EEGPNASSGFMKTAVLGPTLKNVMMKNNKLAVSPNYNATFM
713	1	VDFWGNHLTQSHPEVLGTTIKSPDKVNCVAKPNAYNSGDMH
714	1	FLPPEVNQLLQDVLKIKPDVKQDSSNTPNKGLPLHCDQSFQ
715	1	RQKPCAQEVPGRAFGNASDLKAASGGRDRRMGAAWQEPHRL
716	1	GYTKEEEDEMYNPEFFYENVKIPSITLNKDSQFQIIKQART
717	1	PKSSLAKHMASCRLRKMGYTKEEEDEMYNPEFFYENVKIPS
718	1	NLKTFVKHQQLHNETYQNNVKQVRRLLEAKQEKSMYGVYNT
719	1	NRKKKTLTLPFSWQNMGKNLKGILTTENILSIDNSVNKKDL
720	1	KNLKGILTTENILSIDNSVNKKDLSICGSSGEEFFNNCEVL
721	1	RQAPHWKRHQLTHFKERPQGKVVALDSVMXXXXXXXXXXXX
722	1	TSVVPFKRQRNESRTEGPIVKDEALQILALDPKKYEGRSYE
723	1	DEIDQELVIPCPNCVFASQPKVVGRHFRMFHAPVRKVQNYT
724	1	MFHAPVRKVQNYTVNILGETKSSRSDVISFTCLKCNFSNTL
725	1	SESSFLSKRPSTSEVNNVNPKKPKPSESVSGANSSAVLPSV
726	1	KPKPSESVSGANSSAVLPSVKSPSVTSSQAMLAKGTNTSSN
727	1	SKMAELFMECEEEELEPWQKKVKEVEDDDDDEPIFVGEISS
728	1	KPAISNILNRVNPSSYSRGLKNGALSRGITAAFKPTSQHYT
729	1	QVVMQKVSVCIPTSEHLSELKKEAPAKEQEPVSKEIARPNM
730	1	KHEILHALETLDRLDQEHSDKFGRRSSYGGSSYGNSTNNVP
731	1	QSKESRWTRPKDLDDLEVLVKQEAAGKQQQQLPQTLQPQPP
732	1	SDDCKDYGNLFSHSVSLNEQKPVHFGKSQYECDECRETCSE
733	1	NEAELLRRRNFKVMIYQDEVKLPAKLSISKSLKESEALPEK
734	1	NFKVMIYQDEVKLPAKLSISKSLKESEALPEKEGEELGEGE
735	1	VVYARSKTAVYKVPPFTFHVKKIREGQVEVLKATEMVEVGA
736	1	SSNNDIFLPVKQKIQCQQEKKAPLHNLTYELPTLNQEQENF
737	1	TRAQLAKQIFHSKESIVATTKSKKDTFVLESVDSADEQFQN
738	1	TSREQFFSDEERKYMAINQKKAYILVTPLKSRKVIEQRCMR
739	1	KGQNGKRGDADQKQTIKITAKVGTLKRKQQMREFLEQLPKD
740	1	AKVGTLKRKQQMREFLEQLPKDDHDDFFSTTPLQHQRILLP
741	1	GYPTDQELDEIPVTKRTLKIKQESSEEAQKRDIMQNIVQIL
742	1	RWKEDIRYHYAEISSQVPLGKRLREYFNSEKPEGRIIMTRV
743	1	VLKKKVKEKEEKKKKKIKTIKSEAEDLAEPLSSTEGVAPLS
744	1	VEFKEKTQQWKLLGQSQDNEKELAALFQLWLETKDQAFCKQ
745	1	SDRLSGNNRDPALKPKRSHRKADPDAAHRPRILEMDKEENR
746	1	KERDKEKEREKKKHKVMNEIKKENGEVKILLKSGKEKPKTN
747	1	ASLDSVFSDKLHSKYELQQIKHEPIASVRIKEEPVNVNIPE
748	1	LHSKYELQQIKHEPIASVRIKEEPVNVNIPEKTTALNNMDG
749	1	APVGESATAKFHVTPLFGNVKKENHSSAKENIGLNVFLSNQ
750	1	AGDHPFSSPSPASGGSFSETKSGVLCSLEERWSSYQNQTDN
751	1	SLEEDDDSCGFFKKRHGPLLKDQDESCPKVNSFLTRDKYDE
752	1	LFPPALAGKLAASVHQATKAKPDEPEFHSAQSNKQKQVIEE
753	1	PFESQVEGYLSSQPTQNTIRKLSSENLNAKNNTNSACFCRK
754	1	VPVGKATILNTENLSSTPAPKYLKILPSGLKYNARHPSTKV
755	1	ACQKRSDHLINTESEAVNLSKVKVFTKSAHGGLQRGNKKIP
756	1	LMSTVKPLREPAPSEDVIDIKPEPDDLIDEDLNFVQENPLS
757	1	PDDLIDEDLNFVQENPLSQKKPTVTLTYGSSRPSIEIYRPP
758	1	SGVHLNRLQFQQQQNSIHAAKQLDMQSSWVYETGRLCEPEV
759	1	KPERRPSLPPSKQANKNLILKAISEAQESVTKTTNYSTVPQ
760	1	EPSSLKSSDTNIFDSNVPSNKSNFSRGDERRHEAAVPPLAI
761	1	FTRQLARQQADKKKEEHREDKVIPVTRSLRARNIVQSTEHL
762	1	RQRKATVYYQAPLEKPRHQRKPNIFYSGPASPARPRYRLSS
763	1	LEMDISKKKALQQKDIHKKIKQNESATDEINHQSLIQSKKK
764	1	LKEENLLNVPKPLPKQLWETKEIQSLSGRPRSCDVGGGNAF
765	1	KARKTMRVSDRQQLEAVYKVKEELLKTDVKLLNGNHENGDL
766	1	IHEDDERPSEKNEFSRRKRSKSEDMDNVQSKRRRYMEEEYE
767	1	EVTQATQPEAIPQGTNITEEKPGRKRAEAKGNRSWSEESLK
768	1	EILETSSTKLHPDVPTDKNLKPNPNWNQGKTVVKSDKLVYV
769	1	FIALREELGRISDFHETYTFKQPVFTVSKDSVLAGTNKENL
770	1	ISRSGLTKHQIKHAGENLTTKLNVERPLDVVLTSGIPKXXX
771	1	YKNDQTPNRNALTSITNVEPKTEPACVSPIQNSAPVSDLTK
772	1	CVSPIQNSAPVSDLTKTEHPKSSFRIHRMRRMGSASRKGRV
773	1	VTSDEDKEVSVRHSQTILNAKSRSHSARSHKWPRTETESVS
774	1	KRPCLHGSSLRRLPCRKRFVKNNSSQRTQKQKERILMQRKK
775	1	PKTQESLKGILLHPEPIGAAKSFPAGVEMINSKVGNEFSHL
776	1	YPHKYKKVTTDWFSQRKLHCKQDGEEGTEEDTEEKCTICLS
777	1	SSRMRSDGFDEESQRYYWRPKNEISGTLEDDFLKAKSWNKK
778	1	PPLEMNTGVDSSCQTIIPKIKLEPHEVDQFLNFSPKEAPVD
779	1	IRTTASSELSEKPAESVTSKKTGPLSAQPSVEKENLAIESQ
780	1	RNSISDDDTDSEDELRMMIAKEENLQRTTQPSINESESDPF
781	1	LHSKKEVPIHRVADISGDTQKAKQFLPFLQRAGRSEAVVEY
782	1	TALTGYQTKQRKLLEPVDHGKIEYEPFRKNFYVEVPELAKM
783	1	LQDVLLLRLGSGPAIDLEKVKSECLEPEPELRSTFSEEANT
784	1	YECKQCGKAFSRSTYFRVHEKIHTGEKPYENPNPNASVVPV
785	1	QDKICLEREHPEQHVSTVNSKEEKNPVKEEKTETLFQFEES
786	1	DTRKKTKLISPQNLSVRNNKKLLTSQELQMQRQIRPKSQKN
787	1	LVIFSFHENNCKIQEFHVDGKELIPFTEMTNASEKKSSPFK
788	1	IILSRQTSVLNAGNSVFNHAKKNYGNSSVQASEMTVPQKPS
789	1	HAKKNYGNSSVQASEMTVPQKPSVCHRPCKIEPVGIQRSYK
790	1	ASFVTVKRPGVTGENSNEVAKLVNTLNTIPSLGQSPGPVVV
791	1	TAPVASTPSSTPIPALSPPTKVPEPNENVGDAVQTKLIMLV
792	1	FRMIHEDTRHLLCPYCLKVFKNGNAFQQHYMRHQKRNVYHC
793	1	DRVHDRNVKNMYPPPSFPTNKAATVKSAGATPAEPEELLTP
794	1	GNQQVVDTSLKQTVKANTFGKAGIKTKNFIQKNSMDKKNGK
795	1	QTVKANTFGKAGIKTKNFIQKNSMDKKNGKSYENKSGENQS
796	1	TKNFIQKNSMDKKNGKSYENKSGENQSVDKSDTIPIPNGVV
797	1	DKIMQQETSVPTLKQGLETFKPDYSEQKGNRVDGSKPIWKY
798	1	VDGSKPIWKYETGPGGTSRGKPAVGDMLRKSSDSKPGVSSK
799	1	TVRDTLLALHQHGHSGPFESKFKKEPALTAGRLLGFEANGA
800	1	RDTLLALHQHGHSGPFESKFKKEPALTAGRLLGFEANGANG
801	1	RKTEEKGVDKDFESSSMKISKLEVTEIVKPSPKRKMEPDTE
802	1	QDGNTEPLPPDSGDKNLVIQKSKDEAQDNGATIMPIITESF
803	1	NSLKISDIITRNTNDPGVGSKHLMEGQKIITLDTATEIEGL
804	1	VIPVKDDPDEGEARLENEIPKTSGSEMANKRMKVKHDDHYE
805	1	EGEARLENEIPKTSGSEMANKRMKVKHDDHYELIVDGRVYY
806	1	YQFMSSHIKSVHSQDPSGDSKLYRLHPCRSLQIRQYAYLSD
807	1	SLQIRQYAYLSDRSSTIPAMKDDGIGYKVDTGKEPPVGTTT
808	1	GLKRFSLSAKVVDDEIYYFRKPIVPQKEPSPLLEKKIQLLE
809	1	IYYFRKPIVPQKEPSPLLEKKIQLLEAKFAELEGGDDDIEE
810	1	RRRDVHLSKEQESRLPSHWLKSKGAHTTMADALWRLRDLML
811	1	LEAIVVATNPSGRLISELFQKLPSKVQYPDYYAIIKEPIDL
812	1	DMASPKLKLSRKSGISPKKSKYMTPMQQKLNEVYEAVKNYT
813	1	EVVGTLPGLRLPSSTAHLETKATILPLPSHSSVQMQNLVAR
814	1	SSLMNKMSQGNPGLGSLLNIKAEAEGSPAAEPSPFLGKAVK
815	1	SPAPAQTRKEKGKSKKEDGVKEEKRKRDSSTQPPKSAKPPA
816	1	QLCDKLLTSSLQKSSSLGNLKKETSDGEKETIQKTSEDRAP
817	1	DGRNGESRKEAFNRESKMEPKMEPKVDSSKMDKVDSKTDKT
818	1	TEALPHRQDIFIEETSQGMVKKESIKDGHWDINFEEAVEFE
819	1	QQSVPIERIPNMYYTFGKDFKQNFDLMKCFQIYPGGKPHIC
820	1	KDNIHFKPINTNLDRENELAKTDILSLTSQNKTFDPKKENP
821	1	RMPGSVIPPPLVRGGQQASSKLGPQASSQVVMPPLVRGAQQ
822	1	TNQKKALKVEHTSRLKAAFVKALQQEQEIEQRLLQQGTAPA
823	1	GRHSERTVSAGKGSATSNWKKTPLSTGGTLAFVSPSLAVHK
824	1	RGEGLVGDGPVDMRTSHSDMKSERRPPSPDVIVLSDNEQPS
825	1	QTLTHRSNVSLLEPYQKCGLKRKSEEVDSNGSVQIIEEHPP
826	1	GPGRVVADGTGTRTIIVPPLKTQLGDCTVATQASGLLSNKT
827	1	CLAELNEAMRGRAEEWHGRPKAVREQLLALSACAPFNVRFK
828	1	HLYLVMQLVSGGELFDRIVEKGFYTEKDASTLIRQVLDAVY
829	1	RPGVDSLDEPPNSRIFLVISKYTPESVLRERFSPFGDIQDI
830	1	DLPQLWKGEGAPGQPAEDSVKQEGLDLTGTAATATSFAAPP
831	1	AGLGSNSAPPIPDSRLGEENKGHQMLVKMGWSGSGGLGAKE
832	1	LVEDLEREPGRPRSSVTVSVKGQEVRLEKMTPPKSSQELLS
833	1	PVLFQSPRGFEAGFENEDNSKRDISEEVQLHRTLLARSERK
834	1	EKSLSEVLSQQRPCLGERPYKYLKYSKSFGPNSLLMHQVSH
835	1	YKLKLAEMQRMSENLRGADQKPTSADCAVRAMLYSRAVRNL
836	1	VRAEVEQKLQLLEEKTDEDEKTILNLENSNKSLSGELREVK
837	1	GLKVEPEEPSQMPPLPQSHQKLKESLMTPGSGAFPYQSDFW
838	1	QQDHTTTTDSEMEEPYLQESKEEGAPLKLKCELCGRVDFAY
839	1	LLLKEDHLMSAMNIKLGPALKIYARISMLKDSXXXXXXXXX
840	1	GRPGSGTSGVDSLSNFIESVKEEASNSGYGSSINQDAGFHT
841	1	KMQARSQSRERGDHSHLFDSKDPPIYSVGAFENFRHQLEDL
842	1	VGAFENFRHQLEDLRQLDNFKHPQRDFRQPDRHPPEDFRHS
843	1	SRGPKSDDDGFEIVPIEDPAKHRILDPEGLALGAVIASSKK
844	1	DEVILLLDSDEELELEQTKMKSISSDPLEEKKALEISPRSC
845	1	PPKVPITPMPQYSIMETPVLKKELDRFGVRPLPKRQMVLKL
846	1	PKVPITPMPQYSIMETPVLKKELDRFGVRPLPKRQMVLKLK
847	1	RPSVPQIPECPICGKPFLTLKSRTSHLKQCAVKMEVGPQLL
848	1	CGKPFLTLKSRTSHLKQCAVKMEVGPQLLLQAVRLQTAQPE
849	1	PLLLSAQENIAGIPSAFLELKKEEIKQRQIEQEKLASMKKQ
850	1	GNRTAKQVASRVQKYFIKLTKAGIPVPGRTPNLYIYSKKSS
851	1	SNKELKGMLVWSPNHCVSDAKLDKYIAMAKEKHGYNIEQAL
852	1	PAFLAAPGTTSCPECGKTSLKPAHLLRHRQSHSGEKPHACP
853	1	RIENHGLKGLILKNDWESTGKIEGQERPQEGYFSSVKMPSE
854	1	LMQYQKTETPAQSFGYNDCEKSFLQRGGLITHSRPYKGENP
855	1	YPCRYCTEGKRTFSSRLILEKHVQVRHGLQLGAQSPGRGTT
856	1	SNDSPASSSSRPLKVRIKTIKTSCGNITRTVTQVPSDPDPP
857	1	FLAEASLLKLSPATPTSEGPKVVSVQLGDGTRLKGTVLPVA
858	1	LVPQALPKADGRAGLGTGGQKVNGASVVMVQPSKTATGPST
859	1	NIDYPVLYGKYLNGLGRLPAKTLKPEVRLVKLPFFNMLDEL
860	1	VTRALQLVQFDCSPELFKKIKELYETRYAKKNSEPAPQPHR
861	1	DCSPELFKKIKELYETRYAKKNSEPAPQPHRPLDPLTMHST
862	1	ILYGIPQKTLLLHLEALPAGKPASFKNKTRDFHDSYSYKDS
863	1	PASFKNKTRDFHDSYSYKDSKETCAVLQKVALWARAQAERT
864	1	QAQENAHGLSSSLQSNELVDKKCKSDIEKPKSEERSGVIRE
865	1	LSSSLQSNELVDKKCKSDIEKPKSEERSGVIREVMIIEVSS
866	1	YYSANKNIICRNCDKRGHLSKNCPLPRKVRRCFLCSRRGHL
867	1	CTEIWRQYHLTTKPGPPKKPKTPSRPSALAYCYHCAQKGHY
868	1	YIKAANENPHHDIRKGRASWKSNRWPQENKETQKEMKNKNR
869	1	KKTKKCGKSFTNFSQLYAPVKTHKGEKSFECKECGRSFRNS
870	1	GESNSSETPSTSTVWGGTCKKEENDDDFTFGQSALKKIKTE
871	1	FVDIGVGKSGLIPIRNVTEAKLSKTKKRRSLGLGPGERVEV
872	1	DERIDDEIDTEVEETQEEKIKLECEQIPKKFRHSAISPKSS
873	1	GIQIADHQLRQATKIASAPEKLGRDPRPQTSRISQEQVPEA
874	1	ELADEKIRQARSHVHKTTRDKVQHLRELNHLREKNHHILKL
875	1	TEDFQSSECKESLMDLSHLNKWESIPNTEKSYKCDVCGKIF
876	1	XXXXXMEFSERKRSRKSQSFKLVSRDYHHEVYKIPEFSNDV
877	1	LLNDSTGRIYQRVGKEGEKLKEEPQDLDLVWPPRLNSSAEA
878	1	STEDDGLVRNIDGIGDQEVIKPENGEHQDSTLKEDVPEQGK
879	1	QDSTLKEDVPEQGKDDVREVKVEQNSEPCAGSSSESDLQTV
880	1	SLHSSSQTQMVDECSNDVIIKKIKQEIPEDYYIVANAELTG
881	1	RSGSTRVCHGKIYHEHSRGHKQCPYCLLYKYMYIHRPPTQM
882	1	QQAAKGLHRTSVFDRLGAETKADTTTGSKPTGVFSRLGATP
883	1	HEQRHIREHNGKGYACFQCPKICKTAAALGMHQKKHLFKSP
884	1	PGPYVFCITEKGVVKEEKNEKRHEEPAITNGPRITNAFSII
885	1	TRGEIPEESNYVADPGGSLSKTTNIAEETSKIETYIAKPAL
886	1	PALPGTSTNSNVAPLCQITVKIGNEAIVKRHILGSKLFYKR
887	1	CQITVKIGNEAIVKRHILGSKLFYKRGRRPKYQMQEEPLPQ
888	1	PKVEDPMPESKVGDTCVWDSKVENQQKKPVENRMKEDKSSI
889	1	WDSKVENQQKKPVENRMKEDKSSIREAISKAKSTANIKTEQ
890	1	GSGCGVGDPAEEGRGETAKVKVEADQXXXXXXXXXXXXXXX
891	1	RRRRLVLDPGEAPLVPVYSGKVKSSLRLIPDDLSLLKLYPP
892	1	RRLVLDPGEAPLVPVYSGKVKSSLRLIPDDLSLLKLYPPGD
893	1	GDHEQGDLLVRESQITEVKVKMEKSDRPSCSDSSSLGDDGY
894	1	DLTIEKRLPFSSLSSLASLHKPERSVSPESNDSISEELNHF
895	1	SEYTGPTSADLDHFPSVSQTKAEQDSDNKSSTEIPLETCCS
896	1	SGFPLPSSDLDDSLTEEIDEKIGFRNDANFDWQNVADFRDA
897	1	RRLDIEAERLQVEKERLQIEKERLRHLDMEHERLQLEKERL
898	1	PSQDIPAIFREGMKNTSYVLKHPSTSKVNSVTPKKPKTSED
899	1	SATQSSSSDVDSDATPCKTPKQLLCRPSTGNRVGSQDVSLE
900	1	AREARQHALARQLLLYDRPLKVEPVYLRGGGGSSRRSSSSS
901	1	RKILREYKVSDKTWEKSALLKHQIVHMGGKSYDYNENGSNF
902	1	QKIHSEERLVCSMNVGNSLAKTPTSLNIRDFTMEKVYHXXX
903	1	DDHSASRQPEYRDMRDGFRRKSFYSSHYARERSPYKRDNTF
904	1	SPHSRSGSSVSSRSYSPERSKSYSFHQSQHRKSVRPGASYK
905	1	KPSRLTEKELAEAASKWAAEKLEKSDESNLPEISEYEAGST
906	1	DCETFGMVVKMLIEKDPSLEKSIQFALRQNLHEIESAGQTW
907	1	PENLFLAMLSVVHCNSRKDVKPENKQXXXXXXXXXXXXXXX
908	1	SSVPYMSPNQEVKSPFLPDLKPNLNSLHSSPSGSGPCDELR
909	1	RLQHNLAVSNHVFQLRDSVYKTLIMRPDLELQFKCYHHEDR
910	1	SPKSDCENSETATKEGISEEKSQGLPQEPSFRGISEHESNL
911	1	VRQDNSSEKHLQENKPTMEHKRNICKINPSMVRKFGRNISK
912	1	LQPKTPQQTSASQQMLNFPDKGKEKPTDMQNFGLRTDMYTK
913	1	PKTPQQTSASQQMLNFPDKGKEKPTDMQNFGLRTDMYTKKN
914	1	PESKESDVYKSTYADEELVIKAEGLARSSLCPEVPVPFSSP
915	1	KFLVQNIHTLAELKMTGNCLKGSRPLLSFDPAFDELPHYAL
916	1	PKTLLPHDPTADVFVTPAEEKPIEIQWVKPEPKVDLKARKK
917	1	LSQPKAKPKKKKKPTLRTPVKLESIDGNEEESMKENSGPVE
918	1	KQLAAERAALEQERQELRLEKERINATALRVKLRAEEVESM
919	1	GDVVNEKKRTPNETTSVLEPKKEHKEKEKQGRSRSGSSSSG
920	1	SIDFKHSTSLTQDESTLTEVKSYHCNDCGEDFSHITDFTDH
921	1	TLKCHESVHAREKQGFFVSGKILDQNPEQKEKCFKCNKCEK
922	1	AREKQGFFVSGKILDQNPEQKEKCFKCNKCEKTFSCSKYLT
923	1	EQMVKDWKQRKLKKSNVVSLKAYKGLAEVAVKSLCELLVAL
924	1	PTREQLDSGRIGADEEIDDFKGRSAEEVEEIKAEKEAKTQA
925	1	DDFKGRSAEEVEEIKAEKEAKTQAILLEMVGDLPDADIKPP
926	1	VPQAKPVAVEEKVKEQLEAAKPEPVIEEVDLANLAPRKPDW
927	1	TRPEKGYIWTHVGPTPAITIKESVANHLXXXXXXXXXXXXX
928	1	SSPRETYEEDREYESQAKRLKTEEGEIDYSAEEGENRREAT
929	1	TKLCNDHEVLTFIKYKVFDAKPSAKTLSGLLEWECKTDAVE
930	1	SAVQRQGSGRESPSLASREGKYIPLPQRVREGPRGGVRCSS
931	1	VSSSAASSPERKKRILKPQLKSESSTSAFSTPTRSIPPRHN
932	1	VNGHGGQPSKLVKRGPGRKPKVEVNTNSGEIIHKKRGRKPK
933	1	QGLEIVNPQAAEKKVAEANQKYFSSMAEFLKVKGEKSGLMS
934	1	VLSDNEASSPRSSSRMEERLKAANLEMFKGKGIEERQQLIK
935	1	LLKRSLDPADERDDVLAKRLKMEGHEAMERLKMLALLKRKD
936	1	EKNGKILCEQCMTSNQKKALKAEHTNRLKNAFVKALQQEQE
937	1	RLQQQAALSPTTAPAVSSVSKQETIMRHHTLRQAPQPQSSL
938	1	LALLKRKDLANLEVPHELPTKQDGSGVKGYEEKLNGNLRPH
939	1	RPILPANQKLITLSVQDAPTKKEFVINPNGKSEVCILHEYM
940	1	KAQHKHWELAGTKLGDIMGVKKEEEPDKAVTEDGKVDYRTE
941	1	PLKLLKGSVEAASNAHLLQSKSGTQPHAATRLSLQQPRAEL
942	1	AATRLSLQQPRAELPGQPEMKTQLEQDSIIEALLPLSMEAK
943	1	EGPVLEALLCAETGEKKIELKEEETIMDCQKQQLLEFPHDL
944	1	PEDPRLSFPSIKPDTDQTLKKEGLISQDGSSLEALLRTDPL
945	1	TPKRRGKGKSKGKGVGSARKKLDASILEDRDKPYACDICGK
946	1	KGPDGLALPNNYCDFCLGDSKINKKTGQPEELVSCSDCGRS
947	1	GPGVEQTKQCKEEPKEEKVVKTESVLIKRRLSAQGQAISVV
948	1	HHPIQMKPADSEKNNAVEDRKLFIGMISKKCTENDIRVMFS
949	1	TKERTLKKKKRKLTLTQMVGKPEELEEEGDVEEGYRREISS
950	1	YLCNACGLYSKMNGLSRPLIKPQKRVPSSRRLGLSCANCHT
951	1	DGENEKNSEKEQDSEVSEDTKSEEKETEENKELTDTCKERE
952	1	PDFGFGGQKRQLEDGDQPESKKLASQGDSISSQLGPIHPPP
953	1	RDLLQFFKPRQPKKLYYQQLKMKITDFENRRSFKCIWLNSQ
954	1	RKFLESTDSFNNELKRLCGLKVEVDMEKIAAEIAQAEEQAR
955	1	AALDAQSAEDQTGLLTVKVEKEEASALTAEVRAPCSPARGP
956	1	LSSESEDEEEFIPLAQRLTCKFLTHKQLSPEDSSSPVKSVL
957	1	TALSEKQKRVVEQLRKNLIVKQEQPDKFQIQPLPQSENKLQ
958	1	PRDGVAVAAGAAVAAGTAPLKLPRVSYYGVPSLATLIPGIQ
959	1	IAADMCTNARRVRKRWLPKIKSMLPEGVEMYRTVMGSAAAS
960	1	GSSSPRSHLSPEQGTGIISGKSWNKYNYHPASQKNTQQPLA
961	1	PRSHLSPEQGTGIISGKSWNKYNYHPASQKNTQQPLAKHEP
962	1	GAGQAVHGPVKLGGTPPADGKRFGCLCGKRFAVKPKRDRHI
963	1	NKPRPRGRGLEDGEAGEEEEKEPLPSLDVFLSRYTSEDNAS
964	1	LLSNAMDNTVRVWDVRPFAPKERCVKIFQGNVHNFEKNLLR
965	1	AGEGETVQHFPLARPKSLMQKLQCSFQTSWLKDFPWLRYSK
966	1	VDYNNRKPVNRDGLSSSRDQKIASFWATRNLTNLASNVKIE
967	1	PEARTRFTKSTREALNNKNIKPLLSTFSQVPGSENEKKCTL
968	1	VVNNSRNNTPECLAPVDLVVKKELRASGSSQRMLQWLATKS
969	1	SPLPTKRGTAGLLEQWLKREKEEEPVAKRPYSQXXXXXXXX
970	1	HLQDSFVDKLLDLMPRLMTSKPAEVVKILQTMLRQSAFLHL
971	1	XXXXXXMSLYDDLGVETSDSKTEGWSKNFKLLQSQLQVKKA
972	1	YDDLGVETSDSKTEGWSKNFKLLQSQLQVKKAALTQAKSQR
973	1	GTVAHKIMQKYGFREGQGLGKHEQGLSTALSVEKTSKRGGK
974	1	KHEQGLSTALSVEKTSKRGGKIIVGDATEKDASKKSDSNPL
975	1	DSKTEGWSKNFKLLQSQLQVKKAALTQAKSQRTKQSTVLAP
976	1	KNFKLLQSQLQVKKAALTQAKSQRTKQSTVLAPVIDLKRGG
977	1	YCKHCSYSNRSVVGVLVHYQKRHPEIKVTAKYIRQAPPTAA
978	1	KQGYGAYRCKLCPYTHGTLEKLKIHYEKYHNQPEFDVFSQS
979	1	HYRIKHNNVRAQPEGKNNLFKCALCAYTNPIRKGLAAHYQK
980	1	LRRAVEKKKCSLCSFQSFSKKGIVSHYMKRHPGVFPKKQHA
981	1	KCSWCSFSTMTISQLKEHSLKVHGKALTLPRPRIVSLLSSH
982	1	IVLHREERVVPIEVCRSKLSKYLQGVVFRCDKCTFTCSSDE
983	1	SIMRPNSSASKFSPMSYPQMKPKSPHNSGLVNLTERSRYGM
984	1	MRPNSSASKFSPMSYPQMKPKSPHNSGLVNLTERSRYGMTD
985	1	SGKTAVYKCDECPFTCKSSLKLGAHKQCHTGTTSDWDAVNS
986	1	SSLPLENETDSHPSSSNTVKKSQTSILGLSSKNNFVAKASR
987	1	DLSPVKKRTRIDEIASNLQSKINQTKQQEDAVINVEDDEEE
988	1	KLKKDNQESSDAELSSSEYIKTDLDAMDIKGQESSSDQEQV
989	1	ALQAKQDGKKDVSHSSPVDLKIPQVRGMDLSWESRTGDQYS
990	1	KNPPKKKMKLMRSEGPDVSVKIELDPQGEAAQSANESKNEX
991	1	REAPGPLEGAGEAGGEEADEKPPQFVCRECKETFSTMTLLR
992	1	GPADCSEEVAEVKPKPETEAKAEEASGEKVSGSAAKPRPYA
993	1	EKRPPEIQHFRMSDDVHSLGKVTSDLAKRRKLNSGGGLSEE
994	1	RMSDDVHSLGKVTSDLAKRRKLNSGGGLSEELGSARRSGEV
995	1	NGGCLSAVGLPLGPGREALEKALVIQESERRKKLRFHPRQL
996	1	KLKKQQDKNENLQIISVAHTKILTVDRSHKNVEFGQNFYLK
997	1	NQELASKQEILKEMEHLGDSKLQRDVSLDSKYRETCKRDSK
998	1	NHVKEERPEKIPDLKLLVEKKFLALQSKNSDADFQNNEKFV
999	1	QRTHSGEKPYRARPPAQGPPKIPRSRIPAGERPTICGECGK
1000	1	QRGHLVLTPFGIGDGRARPLKQEAATGLEXXXXXXXXXXXX
1001	1	DEYEKLAEKRLTEEREKKDGKPVQPVKRELLRHRDYKVDLE
1002	1	AEKRLTEEREKKDGKPVQPVKRELLRHRDYKVDLESKLGKT
1003	1	VQPVKRELLRHRDYKVDLESKLGKTIVITKTTPQSEMGGYY
1004	1	IAQLNGKEVKGKRINVELSTKGQKKGPGLAVQSGDKTKKPG
1005	1	SRGDPRATTNTQAQRFHSPKKNPEDQTMPQNRTIYVTLKVN
1006	1	NVEFKKKRKRVNLSHQLNNIKTENEAPIEISSDDSKEDYSL
1007	1	FATKQPKGDASLLQDGVLAEKLSLKPHQGPVLRSNSVPXXX
1008	1	QPKGDASLLQDGVLAEKLSLKPHQGPVLRSNSVPXXXXXXX
1009	1	VSRVKTEQQESDSVQCMPVAKRLWDSGQKEAGGGGNGSRKM
1010	1	AADMCTNARRVVRKSWMPKVKVLKAEDDAYTTFISETGKIE
1011	1	AEHTQCGKPQESTGRGSAFLKAVQGSGDTSRHCLPTLADAK
1012	1	VSESRNLEKKDVETTSSVSVKRKRRLEDAFIVISDSDGEEP
1013	1	CNGLMEEDTVLTRRQKEAKTKSDSGTAAQTSLDIDKNEKCY
1014	1	PKEKGHSEGRLLSFLEQSEHKTSDADIKSSETGAFRVPSPG
1015	1	SPVKSFVSISEATDCLVDFKKQVTVQPGSRTRTKAGRGRRR
1016	1	EGSAANKEVLAKVIDLTHDNKDDLQAAIALSLLESPKIQAD
1017	1	RNELAETLALLKAQIDPVLLKNSSQQDNSSRESPSLEDEET
1018	1	PSLEDEETKKEEETPKQEEQKESEKMKSEEQPMDLENRSTA
1019	1	TTVKKEKEDEKELVKLPVIVKLEKPLPENEEKKIIKEESDS
1020	1	EEKKIIKEESDSFKENVKPIKVEVKECRADPKDTKSSMEKP
1021	1	IKVEVKECRADPKDTKSSMEKPVAQEPERIEFGGNIKSSHE
1022	1	HEITEKSTEETEKLKNDQQAKIPLKKREIKLSDDFDSPVKG
1023	1	KQEEETCKRISTITALGHEGKQLVNGEVSDERVAPNFKTEP
1024	1	ASEKEVVECQSTSTVGGQSVKKVDLETLKEDSEFTKVEMDN
1025	1	SGIEEPSETKGSMQKSKFKYKLVPEEETTASENTEITSERQ
1026	1	PRISRPTAKVAEIRDQKADKKRGEGEDEVEEESTALQKTDK
1027	1	TESDLRRAFDRFGVITEVDIKRPSRGQTSTYGFLKFENLDM
1028	1	DMSHRAKLAMSGKIIIRNPIKIGYGKATPTTRLWVGGLGPW
1029	1	HEPPSSDDMKSDDESSQKDIKVSSRGRTSSTNEDEDLNPEQ
1030	1	RVRDINEAFKELGRMCQLHLKSEKPQTKLLILHQAVAVILS
1031	1	RDHANYEEDENGDITPIKAKKMFLKPQDXXXXXXXXXXXXX
1032	1	LDLNTSLSPSLLQPGKKKHLKTLPFSNTCISRLEKTRSKSE
1033	1	HLKTLPFSNTCISRLEKTRSKSEDSALFTHHSLGSEVNKII
1034	1	RSKSEDSALFTHHSLGSEVNKIIIQSSNKQILINKNISESL
1035	1	SQGSETSKNKFRQVTLYEALKTIPKGFSSSRKASDGNCTLP
1036	1	CIILQPLNKCSPDNKPSLQIKEENAVFKIPLRPRESLETEN
1037	1	FKIPLRPRESLETENVLDDIKSAGSHEPIKIQTRSDHGGCE
1038	1	SDHGGCELASVLQLNPCRTGKIKSLQNNQDVSFENIQWSID
1039	1	HGGCELASVLQLNPCRTGKIKSLQNNQDVSFENIQWSIDPG
1040	1	LRPVDYTDDESMKSLLLLPEKNESSSASHCSVMNTGQRRDG
1041	1	GAIEMELSKYLRDYSRTIPGKQQLLIGAYAKALEIIPRQLC
1042	1	AIKKYQKGFSDKLDFLEGDQKPLAQRKKAGAKGQQMRKGPS
1043	1	LGPVPEIGGSEAPAPQNKDQKAVDPEDDFQREMSFYRQAQA
1044	1	QAAALEQLREKLESAEPPEKKMALVADEQQRLMQRALQQNF
1045	1	RRRRFKKKDVSKEKEERAHLKEPPPAASKGAPATPHLADAP
1046	1	APATPHLADAPKEAEKKVVIKSEAASPALPVITKVETLSPE
1047	1	IYLADMNSSESVGSDAPCVVKVEPSDNGPLFTELKFYQRAA
1048	1	EKKSKRVSSLDTSTHKSSDNKLEETLTREQKEGAFSNFPIS
1049	1	DFVRLKKIPTWKEMAKGVAVKVEEPRYKKDKQLNEKISLLR
1050	1	RGMADSLESTPLPSPEDRLAKLHPSKELLEYYQKKMAECEA
1051	1	KLKERVGNSAGQSLNKPNIHKRVLTEATVGRERSLGERTQE
1052	1	EEEDDDIYATETLSKYDTVLKDEEPGDGLYGWTAPRQYKNQ
1053	1	LQNQKILKRTGQRYEHGRTLKSYLGLTNQSRRYNRKEPAEF
1054	1	PQGGQIAIAMRLRNQLQSVYKMDPLRNEEEVRVKIKDLNEH
1055	1	QVPSAEDEPAPKKQKLSASVKKEDLKSKHDSSAPDPAPDSA
1056	1	FVLQLFSHTQLRGPDSKDSPKDREVAEGGLPRAESPSPAPP
1057	1	RRPLEMEQQQAYRPEMKTEMKQGAPTSFLPPEASQLKPDRQ
1058	1	YGVRRGRVCFEMKINEEISVKHLPSTEPDPHVVRIGWSLDS
1059	1	TVKKQLSRVKSKKTVELPLNKEEIERIHREVAFNKTAQVLS
1060	1	PQVEEAIVQSGQKKLVLILNKSDLVPKENLESWLNYLKKEL
1061	1	ASETVDRLVLESPAPVEVNLKLRRPSFRDDIDLNATFDVDT
1062	1	RSRILGSLDALPMEEEEEEDKYMLVRKRKTVDGYMNEDDLP
1063	1	NLYDLDEDDDGIASVPTKQMKFAASGGFLHHMAGLSSSKLS
1064	1	TKVVQNDAYTAPALPSSIRTKALTNMSRTLVNKEEPPKELP
1065	1	GNVITSDQPILLRLSDSPSMKKESELPRRVNSASSSNPPAE
1066	1	LRMEERFKKKERLLRKKLAKKGIDYDFPSLILQKTESISKT
1067	1	ELNDDDKDDEIVFKQPISCVKEEIQETQTPTHSRKKRRRSS
1068	1	EVSNFTMGSPLRGPGLEALCKQEGELDRRSVIFSSSACDQV
1069	1	KKSNKHDSSRSEERKSHKIPKLEPEEQNRPNERVDTVSEKP
1070	1	ATGDGKFIDQFVYSTKGIGNKTEISVRGQDRLIISTPNQRN
1071	1	KYSVSEEEVKKNKQENDKLKKEIFTLQKDLRDKTVLIEKSH
1072	1	ENPHSEYGLTDNVERIVENEKINAEKSSKQKVDLQSLPTRA
1073	1	DFQKKNNLYPHRTAFPSVALKGHSLASVFKNSVLRSLGAAS
1074	1	DNQTEEHKAVSTVGQISSQHKSEYLHINITGEDRSQQPGDK
1075	1	IIEATCEAPVSIPCSERQLIKPVPFCPVRQADSDLQPLRSE
1076	1	QNKVPIPAPNEVLNDRKEDIKLEEKKKTQAEIEQEMATLQY
1077	1	TGAPSAAGSAAAPCLERAGQKLEPLAYCVPVIQRTQPSAEL
1078	1	AEARPDREKGKGAGASRVTIKQEPPGEDSPAPKRMKLDSRG
1079	1	GGVPGVPGAGGGAAKALADEKALVLGKVMENVGLGALPQYG
1080	1	VPKQNENEEENLDKEQTGNLKQELDDKSATCKAYPKRPLLG
1081	1	SGLLKVLDIMPLTLHACMHQKQRLRNLEQFARLEDCVLLAT
1082	1	DLLNQNHSANAVRPNSKIKVKFEQNGSSKNSHLVSPAVSNS
1083	1	SNSHQNVLSNYFPRVSFANQKAFRGVNGSPRISVTVGNIPK
1084	1	FPNKRPRLEDKTVFDNFFIKKEQIKSSGNDPKYSTTTAQNS
1085	1	LESQINEHLDWCLEGDSIKVKSEESLXXXXXXXXXXXXXXX
1086	1	VTVGGSLSSVLGPPVPEIKVKEEVEPMDIMRPVSAVPPLAT
1087	1	STEEGDMMETNSTDDEKSTAKSLLVKAEKRKSPPKEYIDEE
1088	1	EIVEADVAIGKGDETPLTNVKTEASPESMLSPSHGSNPIED
1089	1	EETRVNCRREKVIETPENDFKHHRSQNHSRSPSEERGHSTR
1090	1	GPIEAVSTIETVPYWTRSRRKTGTLQPWNSDSTLNSRQLEP
1091	1	GAQRSASELTAGAEAEAEEVKTGKCATVSAAVAERESAEVV
1092	1	ALETCSAVGWAPQRLVDPKSKEEAIIIVEDEDEDERESMRS
1093	1	WSDESSQSEDARSSKPAAKKKATMQGDREQLKWKNSSYGKV
1094	1	DREQLKWKNSSYGKVEGFWSKDQSQWKNASENDERLSNPQI
1095	1	HIKIFHAPNASAPSSSLSTFKDKNKNDGLKPKQADSVEQAV
1096	1	LGSNAREESSIHCKRCLFMPKSYEALVQHVIEDHERIGYQV
1097	1	LKSPSLSQSQASRVLGQSSSKPAAAATGPPPGNTSSTQKWK
1098	1	AYHAQNNPPVPPKPQPKVQEKADIPVKSSPQAAVPYKKDVG
1099	1	ADIPVKSSPQAAVPYKKDVGKTLCPLCFSILKGPISDALAH
1100	1	AVPYKKDVGKTLCPLCFSILKGPISDALAHHLRERHQVIQT
1101	1	ALAHHLRERHQVIQTVHPVEKKLTYKCIHCLGVYTSNMTAS
1102	1	KKCVRDCEKYKPGVLLGFNMKELNKVKHEMDFDAEWLFENH
1103	1	EHVLKVIPEDASESEEKLDQKEDGSKYETIHLTEEPTKLMH
1104	1	SLRAAHVPENSDTEQDVLTVKPVRKVKAGKLIKGGKVTTST
1105	1	ETSRSGCDEVSSTSEIGTRYKDGIPVSVAETQTVISSIKGS
1106	1	QTLKCRWKNCDAFFTARKGSKQDAAGHIERHAEDDSKIDSX
1107	1	PYPSQKTLDLQSGLKDITGNKSEMIEKPLFDFSLITTGIQE
1108	1	TRNSPTQKTQKEIHTGSLNHKASSDSAASFEVVRQCPTAEK
1109	1	QCPTAEKPEQEHTPNKMPSLKSPLLPCPATKSLSQKQDPKN
1110	1	CPATKSLSQKQDPKNISKNTKTNFFSPGEHSNPSNKPTVED
1111	1	EHSNPSNKPTVEDNHGPYISKLRSSCPHVLKGNKSTFGSQK
1112	1	KLRSSCPHVLKGNKSTFGSQKQSGDNLNDTLRKAKEVLQCH
1113	1	SHVSYETEGFESASLDAELQKSDISQPSGPLLPELSKLGFP
1114	1	AELQKSDISQPSGPLLPELSKLGFPASLQRDLTRHISLKSK
1115	1	DGKGEEEEEDYFDKELIQLIKQRKEQSRQDEPSNSNQEINS
1116	1	RNVNWEQVIQQVTKKKQELGKGLPRFGIEMVPLVQNEQEAL
1117	1	ENEPQQMVSPSNSLRAGQSQKATMHLKQEVTPRAASLRTGE
1118	1	ERRTRRESRQESDPEDDDVKKPALQSSVVATSKERTRRDLI
1119	1	DPEDDDVKKPALQSSVVATSKERTRRDLIQDQNMDEKGKQR
1120	1	DEKGKQRNRRIFGLLMGTLQKFKQESTVATERQKRRQEIEQ
1121	1	RPRRQSMKEKEHQVVRNEEQKAEQEEGKVAQREEELEETGN
1122	1	EKEIAIVHSDAEKEQEEEEQKQEMEVKMEEETEVRESEKQQ
1123	1	ESVKLTEVPVEPVLTVHPESKSKTKTRSRSRGRARNKTSKS
1124	1	ELQLAKDKERLQAMMTHLHVKSTEPKAAPQPLNLVSSVTLS
1125	1	RSQNYPKNATKTKLKQKFSMKAQNGFNKKRKKNVFNPKRVV
1126	1	ERDVVIRLMNKCEDISNKLTKQVTMLTGNGGGWNIEQPSIL
1127	1	SDITEKTEDSSVPETPDNERKASISYFKNQRGIQYIDLSSD
1128	1	KLISQGTIEESMLKINQQKLKLEQDMTTVDEGDEGSMPADI
1129	1	AGLSYEARHVVSPEQIATSDKMQHFKRTGTGTPVKRVRKAI
1130	1	QHFKRTGTGTPVKRVRKAIEKSETTSEHTCQLCGGWFDTKI
1131	1	SPICVLNEMMQNEEKYEKILKALNSRRIIPRPFVAQKLASS
1132	1	EGLNFLNEYDETKPELPSGKKNQSLTLIELLKNKRMGEERN
1133	1	NSAISPQKIHNQTARKRFVQKCVLPLNEDSPLMYQPQKMDL
1134	1	IVNANLPRTGAGMVEVTSLLKKPASITETSFSLLMAEAASX
1135	1	TTESCSTLKVAADLQLSTPQKASQHQVLFLLSDVAHAKNPT
1136	1	TPQKASQHQVLFLLSDVAHAKNPTHSNKKLPTSASVGCDIQ
1137	1	QVLFLLSDVAHAKNPTHSNKKLPTSASVGCDIQNSVGSNIK
1138	1	LNGLANNMDDLKINTDITGAKEELLDDNNFISDKESGVHKP
1139	1	MAVTENELECHRGIAHGAVVKCPMVTSDIAQRKTQKKTFMK
1140	1	KTFMKDSVVGSSKKSATYICKMCPFTTSAKSVLKKHTEYLH
1141	1	SATYICKMCPFTTSAKSVLKKHTEYLHSSSCVDSFGSPLGL
1142	1	YLHSSSCVDSFGSPLGLDKRKNDILEEPVDSDSTKTLTKQQ
1143	1	LGLDKRKNDILEEPVDSDSTKTLTKQQSTTFPKNSALKQDV
1144	1	KRKNDILEEPVDSDSTKTLTKQQSTTFPKNSALKQDVKRTF
1145	1	ALKQDVKRTFGSTSQSSSFSKIHKRPHRIQKARKSIAQSGV
1146	1	AQSGVNMCNQNSSPHKNVTIKSSVDQKPKYFHQAAKEKSNA
1147	1	MCNQNSSPHKNVTIKSSVDQKPKYFHQAAKEKSNAKANSHY
1148	1	SSVDQKPKYFHQAAKEKSNAKANSHYLYRHKYENYRMIKKS
1149	1	SKKESSVGGEDLDSYPDFLHKMTVVVLQKLNSAEKKDSYET
1150	1	SGDLYRHIRKAHNEDLAKRSKPDPEVGPLLGVQPLPGSPTA
1151	1	PIKGTRSSLSSKKMWGVLQKKTSNLGYSRRALINLSPPSMV
1152	1	RILVVVLQEKIAAFDSCTFTKKFFVTSCYPCPGPNMNPIAL
1153	1	TEDASETDLAKHDEEDYVEMKEQMYQDKLASLKRQLQQLQE
1154	1	FTQSDRAPQKRVRSRASRKHKDETVDFQAPLLPVTCGGVKG
1155	1	PDEDGESRAHSSPPEEPGPLKESPGEAFKALSAVEEECDSV
1156	1	EVTIAKADTTSTVTPVPGQEKGSALEGRADTTTGSAAGPPL
1157	1	GLPMTTEVLKSLAAPPALEKKPQVAYKTEIIGGVVVHTPIS
1158	1	RLSKAKEPHFEYIEQPIIEEKPSLSSKKEIDNLVLPDCWNE
1159	1	NHLHNYALSYTGSDNIIMASKDVFGPNIRGVDKGLQWHHQC
1160	1	VEKSPEETATQVPSLESLTLKLEHEVVARSRPTPQDYEMRV
1161	1	EIFPEQDDQPYVVDKLAEPQKEEPITEVVSQCDLQAPAAGQ
1162	1	CHAPVRLDLPPEKPLTSSLAKQEEVEQTPLQEALNQLMRQL
1163	1	SIEELKDNFKLMCTNAMIYNKPETIYYKAAKKLLHSGMKIL
1164	1	AKKLLHSGMKILSQERIQSLKQSIDFMADLQKTRKQKDGTD
1165	1	FKSPSKENKKKDKDMLEDKFKSNNLEREQEQLDRIVKESGG
1166	1	PQLNGGGGDDLGANDELISFKDEGEQEEKSSENSSAERDLA
1167	1	VDVGGSEPASLSYLSFEGATKRNRPNVQVGDLIYGQFVVAN
1168	1	VPVGIPDRAALTIPQGMEVVKDTSGESDVRCVNEVIPKGHI
1169	1	CNRRFISSEQLQQHLNSHDEKLDVFSRTRGRGRGRGKRRFG
1170	1	LKKESKKERPEETSKDEKVVKSEDYEDPLQKPLDPTIKYQY
1171	1	KVVKSEDYEDPLQKPLDPTIKYQYLREEDLEDGSKGGGDIL
1172	1	AQSCMSPPQKHALSDIADMVKVLPKATTPKPASSSRVPPMK
1173	1	QLARFSEEKFHFSDKPQPDSKPTYSRGRSSNAYDPSQMCAE
1174	1	PLCKQPFDSIFHSVRAEDDFKEYVLRPSYNGSFVTPDRRFR
1175	1	AASAPARPAPASSEIMASAAKEFKMDNFSPKAGTSKLQQTV
1176	1	APARPAPASSEIMASAAKEFKMDNFSPKAGTSKLQQTVPAD
1177	1	ASKAKDSHYQKSSSKLDGNYKNESDTFSDSRSSDRETKHKR
1178	1	MGNKNEVNDKFSIGDLQEEEKHKESDLRDVKKTQIHFDPEV
1179	1	SDLRDVKKTQIHFDPEVVQIKAGKAEIDRRISAFIERKQAE
1180	1	ALEQHILYLQPFLAKLQSPIKEENTTAVEEIGRTEMGNKNE
1181	1	KMASSENGTNFRFTRFVEDSKEIVTSXXXXXXXXXXXXXXX
1182	1	FLPLPLVQSPRLSNLPGWSLKDGNAFLDKELKECSGHVFVD
1183	1	YEQEKSWQDSERLKGILERGKEELAEAEIIKDSPDSPEPPN
1184	1	LWESGDMSDQHRQVLLEIFSKNYRVRRNMIQSRLTQECGED
1185	1	QNMEREISNSDGTRPVGMLGKATSTSDMLLKLARTTPYYKR
1186	1	RIIINPSSSLLASQDETKLPKIDFFDYSKLTPLDQRCFIQA
1187	1	RKALSDAIKKWQELSPETSGKRKKRKQMNQYSYIDFKFEQG
1188	1	DFKFEQGDIKIEKRMFFLENKRRHCRSYDRRALLPAVQQEQ
1189	1	SYDRRALLPAVQQEQEFYEQKIKEMAEHEDFLLALQMNEEQ
1190	1	GLWKEHNGLTCEELAEKDDIKYRTSIEEKMTAARIRKCHKC
1191	1	EEQKRKNGENTFKRIGPPLEKPVEKVQRVEALPRPVPQNLP
1192	1	IVQISGNSMPRGSGSGFKPFKGGPPRRFXXXXXXXXXXXXX
1193	1	ITHPRHPREAGPNPSRPTSWKSEGSMSTDKRETRVERPERS
1194	1	SSLVVKEAKVGEPEVKEEKVKEEVMDWSEVKEEKDNLEIKQ
1195	1	KEEKDNLEIKQEEKFVGQCIKEELMHGECVKEEKDFLKKEI
1196	1	XXXXXXXMVFFTCNACGESVKKIQVEKHVSVCRNCECLSCI
1197	1	EREQRLEKLDSRDGKFIHRMKLESASTSSLEDRVKRNIYSL
1198	1	TPSQPVNNHHAHSHTPVEKRKYNPTSHHTTTDHIPEKKFKS
1199	1	EYRFSPNSNKSNKLSTGNKMKFENSSNKIVIQDEIQNCIVT
1200	1	NSTEASERKSALNTRYSNEQKNKCILNQSIKAPVNTDLFGS
1201	1	AALCSKSNPEERYETPKRALKMDSLSSSFSSPNDPDGQNDI
1202	1	RDESRGRSSFYPDGGDQETAKTGKFLKRFTDEESRVFLLDR
1203	1	ADQGKSFATASHRNTEEEGLKYKSKVSLKGNRESDGFREEK
1204	1	HKNLDAREKSTFREESPLRIKMIASDSHRPEVKLKMAPVPL
1205	1	ESPLRIKMIASDSHRPEVKLKMAPVPLDDSNRPASLTKDRL
1206	1	DISPSTLRKHTRLAGEERVFKEENQKGDKKLRCDSADLRHD
1207	1	NRPPIKTYEARSRIGLKLKIKQEAGLSKVVHNTALDPVHQP
1208	1	AAAPAGGKAPGQHGGFVVTVKQERGEGPRAGEKGSHEEEPV
1209	1	AWEPTEAEARARASNEDGDIKRISTKEWAKSTGYDPVKLFT
1210	1	DDFLQDYTLLINILHSEDLGKDVEFEVVGDAPEKVGPKQAE
1211	1	ATHHNPDSWISQSASFPRNQKQPGVDSLSPVASLPKQIFQP
1212	1	LTNVGNSFSGPANPLVSRSNKFQNSSVEDDDDVVFIEPVQP
1213	1	TPTESSSHGEGQNPKTLVEEKPYLCPECGAGFTEVAALLLH
1214	1	TKITWMKAEDSSKVSGGTPIKIEDPNQFVPLNTNPNEVLEK
1215	1	MRTPKKKKIKLSHPKDMNNFKLERERSYELVRSAETHSLPS
1216	1	LDLFQLNKLVAEEGGFAVVCKDRKWTKIATKMGFAPGKAVG
1217	1	LFLSGDSLRCLQKPNLTTDTKDKEYKPHDIPQRQSVQPSET
1218	1	SETCPPARRAKRMRAEAMNIKIEPEETTEARTHNLRRRMGC
1219	1	NTRAHAYGDPNAGLNSQLHYKRQMYQQQPEEYKDWSSGSAQ
1220	1	HDPSAQEAGRCLMSSDGLPNKGMELKHGSQKLQESCWDLSR
1221	1	RYGPPHETDGHGLAEATQSSKPGSVMLRLPGQEDHSSQNPL
1222	1	RKGEVASDLVSPANQELHVEKPLPRSSEEWRGSVDDKVKTE
1223	1	FGSAVPRNVSGFPQYPTGQEKGDFTGHGERKGRNEKFPSLL
1224	1	SSSTAPEMKQINLTDYPIPRKFEIEPQSSAHEPGGSLSERR
1225	1	LNPTLSQSVILPGGLVSMETKLKSQSGQIKEEDFEQSKSQA
1226	1	KSQASFNNKKSGDHCHPPSIKHESYRGNASPGAATHDSLSD
1227	1	XXXXXMFGIQESIQRSGSSMKEEPLGSGMNAVRTWMQGAGV
1228	1	RSEDHLTESHQREIPLPSLSKYEAQGSLTKSHSAQQPVLVS
1229	1	RPGPTANGASKEKTKAPPNVKNEGPLNVVKTEKVDRSTQDE
1230	1	TIKEEPKIDFRVYNLLTPDSKMGEPVSESVVKREKLEEKDG
1231	1	SPNVEAAHLARPIYGLAVETKGFLQGAPAGGEKSGALPQQY
1232	1	LAVQGLPEGLAFRRPAEYDPKALMAILEHSHRIRFKLKRPL
1233	1	HSHRIRFKLKRPLEDGGRDSKALVELNGVSLIPKGSRDCGL
1234	1	EDGGRDSKALVELNGVSLIPKGSRDCGLHGQAPKVPPQDLP
1235	1	NGVSLIPKGSRDCGLHGQAPKVPPQDLPPTATSSSMASFLY
1236	1	FVVGLPEGISLRRPNCFGIAKLRKILEASNSIQFVIKRPEL
1237	1	SPPALPPERDSGDPLVDESLKRQGFQENYDARLSRIDIANT
1238	1	GLEEIAKEREKLKKAESVQIKEEMFETSGDSLNCSNTDHCE
1239	1	YLAGIFVEGTEGNLVPEEVIKKETDSLKVAAHASLNPALFS
1240	1	QVCLCLGQLERSIAWEKSVNKVTCLVCRKGDNDEFLLLCDG
1241	1	EFLLLCDGCDRGCHIYCHRPKMEAVPEGDWFCTVCLAQQVE
1242	1	LPSGAFSDCLTIVEFLHSFGKVLGFDPAKDVPSLGVLQEGL
1243	1	GGLGYVEETSEFEARVISLEKLKDFGECVIALQASVIKKFL
1244	1	LEKLKDFGECVIALQASVIKKFLQGFMAPKQKRRKLQSEDS
1245	1	KENGKVENGLGKTDRKKEIVKFEPQVDTEAEDMISAVKSRR
1246	1	CVQRRCLRGKHARRKGGCDSKMAARRRPGAQPLPPPPPSQS
1247	1	TLKPTLATRTAQPDHTQAPTKQEAGGGFVLPPPGTDLVFLR
1248	1	ALLQEAQCSGLSWVVALPQVKQEKADTQDEWTPGTAVLTSP
1249	1	EKQLYGSSNTLLKKIEGIPEKKEKTSQLQLSVECGTDTLLI
1250	1	KTFTQERGQESNRFEKRINVKSEVMPGPIGLPRKRDRKYDT
1251	1	LKTETALPPTPQDISYLAKGKVANTNVTLQALRGTKVAVNQ
1252	1	GHRFTTKGNLKVHFHRHPQVKANPQLFAEFQDKVAAGNGIP
1253	1	ASISTLAGLSLKEGEDQKEIKIEPAQAVDEVEPLPEDYYTR
1254	1	WLSSCEEVDDCKDQLEKQQEKQEILLQEVAFTQRKAVIHER
1255	1	ILLQEVAFTQRKAVIHERVCKSDETGEKSGLNSSLFSSPVI
1256	1	FSSPVIPIRNHFHKHVSHAKKWHLNAAVNSHQKINENETLY
1257	1	FRNLLSVGHQSLHRDTFHFLKEEKFWMMETATQREGNLGGK
1258	1	ALSTLGGFSPASKPSSPREVKAEEKSPISINVKTVKKEPED
1259	1	HEYELNSTPDKKDYEQPTCAKVENAQFKGTQSLLLEVDATS
1260	1	GKSTLKDWKRAIRMNGIMLRKIMDSGELDFYQHDKVCSNTC
1261	1	GGGMRVGPQYQAVVPDFDPAKLARRSQERDNLGMLVWSPNQ
1262	1	VDQNKESKKEVPPTETVPQVKKEKHSTQAKNRAKRKPPKGM
1263	1	PKRKQSPAYMKEDVKALDTTKAPKGSLKDIYKVFNGEGEQI
1264	1	AEEPEIPYSYSREYNEYENIKLERHVVSFDSSRPTSGKMNC
1265	1	DSGEGPANEDEDIGDDSMKVKDEYSERDENVLKSEPMGNAE
1266	1	AEQDELDYHRGLLVDRPSETKTEEQGIPRPLHPPPPPPVQP
1267	1	EEEGDDEGQKSREAPILKEFKEEGEEIPRVKPEEMMDERPK
1268	1	YSAQKDLEPESDRSAQPLPLKIEELALAKGITEECLKQPSL
1269	1	FGIRAKKTKEQLAELKVSYLKNQFPHDSEIIRLMKITGLTK
1270	1	RREIDAWFTEKKKSKALKEEKMEIDESNAGSSKEEAGETSP
1271	1	SKKHANKVKRYLAIHGMETLKGETKKLDSDQKSSRSKDKNQ
1272	1	DSFKAKQMENHQLIKEAVEMKSVMDSMKQTGVDPTSRFKQD
1273	1	EMKSVMDSMKQTGVDPTSRFKQDPDSRTWHHYVYQPKYLDQ
1274	1	TSRFKQDPDSRTWHHYVYQPKYLDQQKSEELDREKKLKEDS
1275	1	IDIVREREIKKALIIKLRRGKPGFQGQSSSQAQQVIKRNLR
1276	1	LRRGKPGFQGQSSSQAQQVIKRNLRSRAKGAYICTYCGKAY
1277	1	EHESKCEYKKLTCLECMRTFKSSFSIWRHQVEVHNQNNMAP
1278	1	RKVLQEILEKNPRFHHLTPLKTKHIAHWCRCHGYTPPDPES
1279	1	SSFSSADNLCRKLEDLQQFQKREPENEEEVDILSLSEPVKI
1280	1	MEQRPSRNTGRDTSRITGSHKTEQRNADLTDETSRLFVKKT
1281	1	ISTPSPSPLPRTPTSTPVHVKQGTAGSVINNPYVIMDKQPG
1282	1	QGTGSPVPKIHGSSFVTSTVKQEDSLFASMPPLCPIGSHPK
1283	1	KVQSPKPITGGLGAFTKVIIKQEPGEAPHVPATGAASQSPL
1284	1	KQEKVKLNFDMTASPKILMSKPVLSGGTGRRISLSDMPRSP
1285	1	GSLSGSPKPFSPQLSAPITTKTDKTSTTGSILNLNLDRSKA
1286	1	QLYYMGDLIQHRRTQDHKIAKQSLRPFCTVCNRYFKTPRKF
1287	1	PFCTVCNRYFKTPRKFVEHVKSQGHKDKAKELKSLEKEIAG
1288	1	FHSRPCPTKILEDVVGVPEKKVLPITVPKSPAFALKNRIRM
1289	1	KAKSRQVGKEKGKYKEELIEKMQEXXXXXXXXXXXXXXXXX
1290	1	RGFVTGGADKSVKFWDFELVKDENSTQKRLSVKQTRTLQLD
1291	1	RFNEMMKVVQVYADTQEINLKADSEVAQAGKAVALYFEDKL
1292	1	DMLQDVYHVVTLKIQLQSCSKLEDLPAEQWNHATVRNALKE
1293	1	RSESPCLRDSPDRRSGSPDVKGPPPVKVARLEQNGSPMGAR
1294	1	PSSSRTPQAKTSTPTTDLPIKVDGANINITAAIYDEIQQEM
1295	1	RSPQQTVPYVVPLSPKLPKTKEYASEGEPLFAGGSAIPKEE
1296	1	ISVKQEITFTDVSEQLMRDKKQIREPVDLQKKKKRKQRSPA
1297	1	LKHKRMCHENHDKKLNRCAIKGGLLTSEEDSGFSTSPKDNS
1298	1	SDLKKDKNDYLPLYSSSTKVKDEYMVAEYAVEMPHSSVGGS
1299	1	EMRQQDMISHDELMVHEETVKNDEEQMETHERLPQGLQYAL
1300	1	ESRSTQYMKEYQDAFLFNELKGETMDTSXXXXXXXXXXXXX
1301	1	SPYYMELTKLLLNHASDNIPKADEIRTLVKDMWDTRIAKLR
1302	1	LQLGNFPEPLFDVCKKSSVSKLSTPKERVSRRFGRSFTCDS
1303	1	NRHLYQNTRSYHRIVDIRDGKDSNIKAEFGEKDSSKTFSAQ
1304	1	DIRDGKDSNIKAEFGEKDSSKTFSAQTDKYRGDTSQAADDS
1305	1	KYRGDTSQAADDSASTTGSRKSSTVESEIASEEKSRAAERK
1306	1	NQLEDNLESSEQRLFWHEDSKPGTLVXXXXXXXXXXXXXXX
1307	1	KTQRNVSQVQDFGEGCEFQGKLDRKQGIPMKEILGQPSSKR
1308	1	SSSKDSRPSQAAGDNQGDEAKEQTFSGGTSQDTKASESSKP
1309	1	STYGSSQKEESAASGGAAYTKRYLEEQKTENGKDKEQKQTN
1310	1	KEKIKEKGSFSDTGLGDGKMKSDSFAPKTDSEKPFRGSQSP
1311	1	DDEPKFMSKVIGANKNQEEEKSGKWEGLVYAPPGKEKQRKT
1312	1	RSEGGHRGFVPEKNFRVTAYKAVQEKSSSPPPRKTSESRDK
1313	1	TFRKHGLAHDEMKSPREPGYKAEGKYKDDPVDLRLDIERRK
1314	1	HGLAHDEMKSPREPGYKAEGKYKDDPVDLRLDIERRKKHKE
1315	1	DFQKRNREEEWDPEYTPKSKKYYLHDDREGEGSDKWVSRGR
1316	1	LEARLRTLEDRGIRKISGTGKALAKTEKYEHKSEVKTYDPS
1317	1	EVKTYDPSGDSTLPTCSKKRKIEQVDKEDEITEKKAKKAKI
1318	1	RDVLLSSSSRTDDHHGTEEPKQDTNVKKAKRPKPESQGIKA
1319	1	SSSRTDDHHGTEEPKQDTNVKKAKRPKPESQGIKAKRKPSA
1320	1	QGNTSSSRRKTKSKSIAIENKEQKTGKTNESQISNNINMQS
1321	1	APLSLIDSSALNAEIKSCHDKSGIPDEVLQSILDQYSNKSE
1322	1	LSPGTQTPSNDKASMLQEYSKYLQQAFEKSTNASFTLGHGF
1323	1	QKNLETSSAFQSSSQKLTSQKEQKNLESSTGFQIPSQELAS
1324	1	KETKEEVTPEQLKLMRTQDVKYIEMKRVAEAKKIERLKSEL
1325	1	QYNCLTQRIEREKKLFVIAQKIQTRKDLMDKTQKVKVKKET
1326	1	AQKIQTRKDLMDKTQKVKVKKETVNSPAIYKFQSRRKRXXX
1327	1	FYYKMTRVKLQDGVHIIKETKEEVTPEQLKLMRTQDVKYIE
1328	1	ANIRLPPEVNRILYIRNLPYKITAEEMYDIFGKYGPIRQIR
1329	1	EYRNLFKYVGETQPTGQIKIKREDYESLPKEVASAKPKVLL
1330	1	LEHMGNTPLKIGSDGSQEDAKEDGFGSEVIKVYIFKAEAED
1331	1	RLPRRALQTQNSEIVKDDEGKEDYQFDELNTEILNNLADQE
1332	1	SEDPKKKRAQKPSHMRRNIRKLLREDQLEPVTKAAQQEELE
1333	1	VEELGSAGTSARCPPQGTKGKGEDSTLASSMGEATNSKFLQ
1334	1	TKGKGEDSTLASSMGEATNSKFLQGVGFNPFQERGNNIVTY
1335	1	KILVFSQSLSTLALIEEFLGKREVPCPPGTEGQGAQKWVRN
1336	1	ARHVEVEKQQKEEKNRAFREKIDFQHAHGLQELEFIRGHSD
1337	1	CVDQWLKMPGLKTGTINCGTKSSFRRGGHTWVSGKPILCPI
1338	1	CPNCFLLFSRKEECSKHMSGKNHFHQSFKLGDNKGIAHPIS
1339	1	GIAHPISFPSFAKKLLISLCKDVPFQVKCVACHKTLRSHME
1340	1	DLHLLLDQSKFSSLKRTMSIKESSSLECIAIPKKKMNLKDK
1341	1	SLKRTMSIKESSSLECIAIPKKKMNLKDKSHEGVACVQKEK
1342	1	EVEGETLPSSSTTLDNLTANKPSSAITVIDHSPANSSPRGK
1343	1	EDMFDSQEYVKQHCMSLASHKFHRYSCAHCRKPFHKIETLY
1344	1	SLASHKFHRYSCAHCRKPFHKIETLYRHCQDEHDNEIKIKY
1345	1	YEEHHSIDYVFVSEKTETSIKTEDDFPVIETSNQLTCGCRE
1346	1	EPSTSYTDENIKRKDHIDYQKDKVALTLARLARHVEVEKQQ
1347	1	STSYTDENIKRKDHIDYQKDKVALTLARLARHVEVEKQQKE
1348	1	THIHQVHKEKSDEEEQQYVIKCGTCTKAFHDPESAQQHFHR
1349	1	HFHRKHCFLQKPSVAHFGSEKSNLYKFTASASHTERKLKQA
1350	1	SEKSNLYKFTASASHTERKLKQAINYSKSLDMEKGVENDLS
1351	1	IYNYLNRIGCFFLHPRCSKRKDAADFAICMHAGRLDEQLPK
1352	1	YIRGSTIKYLRIPDEIIDMVKEEVVAKGRGRGGLQQQKQQK
1353	1	HQKELAAQLNEEAKRRLTEQKGEQQIQKARKSNVSYKNPSL
1354	1	EVQKRYKTREAEEKEKEGIVKQDSLVINLNRSNPKLKDLYI
1355	1	VTMGLPLPMDPKKLAPFSGVKQEQLSPRGQAGPPESLGVPT
1356	1	ELLAKALHLLKSSCAPSVQMKIKELYRRRFPRKTLGPSDLS
1357	1	KDSWAAELENSSKENEVIEVKSMGESQSKKLQGGYECKYCP
1358	1	TASRPAPLVQQLSPSLLPNSKSPREVPSPKVIKTPVVKKTE
1359	1	VQILRNCLRYFLPPSFPISKKQLSAMNSDELISFPLKEYFK
1360	0	LIDNSLSATSRNIGVRRIQIKLLFDETQGKPAVAVIDNGRG
1361	0	RGLAPIECYNRISGALFTNDKFQVSTNKLTFMDLELKLKDK
1362	0	VQIAMEPQALYDEVRTVPIAKLDRTVAEKAVKKYVEDEMAR
1363	0	DEVRTVPIAKLDRTVAEKAVKKYVEDEMARLPDRLSVTWPE
1364	0	SLHYEEITKGPNCVIRGVTAKGPVNSCQGKNYNLKVTLPGL
1365	0	GPNCVIRGVTAKGPVNSCQGKNYNLKVTLPGLKEDSQILKI
1366	0	ALRMLPKTGCVIQPVPKPAEKAAMAPCIISSPMLSAGPEDL
1367	0	IGARLEALDYLQKWYPSRIEKIDYEEGKMLVHFERWSHRYD
1368	0	NTQKPALLSSTLSSGKARSKKCKHESGDSSGCIKPPKSPLS
1369	0	ARSKKCKHESGDSSGCIKPPKSPLSPELIQVEDLTLVSQLS
1370	0	GPPISPAALALASPMIAPTLKGTPSSSAPLALVALAPHSVQ
1371	0	TAKGKDASHSPKGPLAPPESKASTPLTAAAFEKVLPKPESA
1372	0	TQQAQLAAAAEIDEEPVSKAKQSRSEKKARKAMSKLGLRQV
1373	0	APSEPKTNLNKVPSEVVPNPKGTPSPPCIVSTVPYHCVTPM
1374	0	EIPKSVPSPSLPPAGTPPGTKKVDGISHTSALAPVASSPKE
1375	0	YNTNLEGWNEVPDEAYDLLDKLLDLNPASRITAEEALLHPF
1376	0	ILAHNNFVGRLIGKEGRNLKKIEQDTDTKITISPLQELTLY
1377	0	GNDDPEMGERAENSSKSDLRKSPVFSDEDSDLDFDISKLEQ
1378	0	SISETDEDDDLQENEDNKQHKESLKRVTFALPDDAETEDTG
1379	0	KEKNKAGDIKTAAEKTATDKKRERRKKKYQKRMKIKEKEKR
1380	0	PQEVPQENGMEDPSISFSKPKKKKSFSKEELMSSDLEETAG
1381	0	SKEELMSSDLEETAGSTSIPKRKKSTPKEETVNDPEEAGHR
1382	0	EEPVSSGPEEAVGKSSSKKKKKFHKASQEDXXXXXXXXXXX
1383	0	QLVTHLHRVVSELLQGGTSRKPSDPAPKVMDFKEKPSSPAK
1384	0	EQLMKLNSGLGQLILKEEMEKESRERSSLLASRYDSPINSA
1385	0	PVTAPGTPALPPTEEIWVENKTPDGKVYYYNARTRESAWTK
1386	0	YNNRTLESTWEKPQELKEKEKLEEKIKEPIKEPSEEPLPME
1387	0	TLESTWEKPQELKEKEKLEEKIKEPIKEPSEEPLPMETEEE
1388	0	EDLFKQYIEKIAKNLDSEKEKELERQARIEASLREREREVQ
1389	0	PEGSPPFEAAHQTDRFWDLNKHLGPASPVEVPPASLRSSVP
1390	0	KEQQLQIFNLMKFDSYTRFLKSPLYQECILAEVEGRALPDS
1391	0	HSLGSDHSSVSTPKKLSGKSKSGRSLNEELGDEDSEKKRKG
1392	0	SKKRQWALEDFEIGRPLGKGKFGNVYLAREKQSKFILALKV
1393	0	VDKKAEMGLKEREAALKEEWKQKPSIPPTLTKAPSLTDLVK
1394	0	SGDGANAGGLVAAIAPKGSEKAAKASRSVAGSKKEKENSSS
1395	0	CMEKEKCKKPSSLKPEKIPSKSLKSARPIAPAIPPQQIYTF
1396	0	EGKVDSVKSKDAEQLVKEGAKKTLFPPQPQSKDSPYYQGFE
1397	0	QSSPGALNPSSQAGVESQALKTKRDEEPESIEGKVKNDICE
1398	0	FSKYSEMSEEKRAKLREIELKVMKFQDELESGKRPKKPGQS
1399	0	YSEMSEEKRAKLREIELKVMKFQDELESGKRPKKPGQSFQE
1400	0	QREKEKELERERERDKKDKEKLESRSKDKKEKDECTPTRKE
1401	0	EKLESRSKDKKEKDECTPTRKERKRRHSTSPSPSRSSSGRR
1402	0	LFSGAASPELKCAACGKVLAKDFHVVRGHILDHLNLKGQAC
1403	0	ESEDNKFSDDSDDDFVQPRKKRLKSIEERQLLKXXXXXXXX
1404	0	EEAFQNQKVIIDTLITKLMEKTKYIKFTGNQIQNRIIEVNQ
1405	0	HTGTIPGAQGLMNSSLLHQPKARPXXXXXXXXXXXXXXXXX
1406	0	EGTGSTATSSSSTAGAAGKGKGKGGSGDSAVKQVQIDGLVV
1407	0	TVETLEPLGVLFPSTTKKRKKPKGKETFEPEDKTVKQEQIN
1408	0	PQQPEGAKPQAQAALAAPKKKTKKEKQQDATVEPETEVVGP
1409	0	VVGPELPDDLEPQAAPTSTKKKKKKKERGHTVTEPIQPLEP
1410	0	LPDDLEPQAAPTSTKKKKKKKERGHTVTEPIQPLEPELPGE
1411	0	DFAPECFNGRHVPLSGSQIVKGKLAGKRHRYRVLSSCPQAG
1412	0	LDLVAAKCYYYHARVYEFLDKLDVVRSFLHARLRTATLRHD
1413	0	ELREKLAAAKEKRLLNQKLGKIKTLGEDDPWLDDTAAWIER
1414	0	EHKKHKHRSGGSGGSGGERRKRSRERGGERGSGRRGAEAEA
1415	0	KEIEGEEIEIVLAKPPDKKRKERQAARQASRSTAYEDYYYH
1416	0	GRTVDATGKEIELTHRMPTLKANIRAVKREQFKQQLKEKPS
1417	0	IAPSQRQRRTFKFHDKGKFEKIAQRLRTKAQLEKLQAEISQ
1418	0	AVQDPTKVEAHVRAQMAKRQKAHEEANAARKLTAEQRKVKK
1419	0	EEANAARKLTAEQRKVKKIKKLKEDISQGVHISVYRVRNLS
1420	0	VVLHKDVNVVVVEGGPKAQKKFKRLMLHRIKWDEQTSNTKG
1421	0	GSVSEVKKDSSQLGTDATKEKPKEVAENQQNQSSDPEEEKG
1422	0	PAKEIKRQLRNLPWLFTFNVKFYPPDPSQLTEDITRYFLCL
1423	0	KEISPGSGPGEIRKVEPVTQKDSTSLSSESSSSSSESEEED
1424	0	REKETSESRGISRFIPPWLKKQKSYTLVVAKDGGDKKEPTQ
1425	0	ISRFIPPWLKKQKSYTLVVAKDGGDKKEPTQAVVEEQVLDK
1426	0	EEGNPVRGSEEDSPKKESKKKTLKNDCEENGLAKESEDDLN
1427	0	SEREFEENGLEKDLDEEGSEKELHENVLDKELEENDSENSE
1428	0	ERRWNKRTQQMLHGLQRALAKTGAESISLLELCRNTNRKQA
1429	0	ASAGPADAEMEEIFDDASPGKQKEIQEPDPTYEEKMQTDRA
1430	0	YDELRQCIRNSPQFRFDWFLKSRTAMELQRRCNTLITLIER
1431	0	PQGYSDSEERESMPRDGESEKEHEKEGEDGYGKLGRQDGDE
1432	0	SRQKMDCKAEEISKLKGYHMKDPCSQPEEQGVTSPNIPPVG
1433	0	KISIAVGLPQEFVKEWFEQRKVYQYSNSRSPSLERSSKPLA
1434	0	EVVIQLQEKHVKDEQIEHWKKIVKTQEELKELLNKMVNLKE
1435	0	SSRKRLHVNDASHNHHSKMSKSSKSSGSSSSSSSSVKQYIS
1436	0	WRQPELPEVIAMLGFRLDAVKSNAAAYLQHLCYRNDKVKTD
1437	0	TVISILNTINEVIAENLEAAKKLRETQGIEKLVLINKSGNR
1438	0	PAPPILSGDTPIAPTPEQIGKLRSELEMVSGNVRVMSEMLT
1439	0	SESESDETPPAAPQLIKKEKKKSKKDKKAKAGLESGAEPGD
1440	0	SDETPPAAPQLIKKEKKKSKKDKKAKAGLESGAEPGDGDSD
1441	0	ETPPAAPQLIKKEKKKSKKDKKAKAGLESGAEPGDGDSDTT
1442	0	TPPAAPQLIKKEKKKSKKDKKAKAGLESGAEPGDGDSDTTK
1443	0	KAGLESGAEPGDGDSDTTKKKKKKKKAKEVELVSEXXXXXX
1444	0	DTKLYDILGVPPGASENELKKAYRKLAKEYHPDKNPNAGDK
1445	0	EALCGFQFTFKHLDGRQIVVKYPPGKVIEPGCVRVVRGEGM
1446	0	VIRPPEQNAPPPGAPDKDKQKQEPKTPVAPKKDLKIKNMGS
1447	0	LPPEPKTTKLGQRRESSRPVKPPKKDVPDSQQHPAPEKSSK
1448	0	RPVKPPKKDVPDSQQHPAPEKSSKVSEQLKCCSGILKEMFA
1449	0	EYRDAQEFGADVRLMFSNCYKYNPPDHEVVAMARKLQDVFE
1450	0	VHEQLAALSQPQQNKPKKKEKDKKEKKKEKHKRKEEVEENK
1451	0	NGFSRTLKSGDGITFGVFGSKFRIEYEPLVACSSCLDVSGK
1452	0	IKVSKMEQKFRMLSQDAPTVKESCKTSSNNNSMVSNTLAKM
1453	0	PVDTNSDNNLFTDTDLKSIVKNSASKSHAAEKLRSNKKREM
1454	0	GLSALAVRFLGCPPSIVPSEKLFNTPTENGSLGQSRLMMEH
1455	0	KNSHLRHIEHMESDELGLQKKLRTEVIQLEDTLAQVRKEYE
1456	0	AELKKAQESQKEMKLLLDMYKSAPKEQRDKVQLMAAERKAK
1457	0	LPPHLVQGAKILNGAFRSWTKKQALAEHEDELPEHFKPSQL
1458	0	ATPPQSLLEKVSKKKTPKTVKMPKPSKIPKPPKPPKPPRPP
1459	0	DYVYPSLESDEDNPIFKSRSKKRKGSDDAPYSPTARVGPSV
1460	0	ECLNFGIKTLEEIKSKKMKEKSKKQGEGSSGVSSLLLHPEP
1461	0	KVGEIHVKTLEEILLERASQKRGELQTKLKTEGPSKTDDST
1462	0	ATPGARRLLRITKRTGMKEEKNLQEGNEVDSQSSIRTEAKE
1463	0	TQVAEKPVLTAVPGITRHLTKRLPTKSSQKVEVETSGIGDS
1464	0	GIGDSLLNVKCAAQTLEKRGKAKPKVNVKPSVVKVVSSPKL
1465	0	GDSLLNVKCAAQTLEKRGKAKPKVNVKPSVVKVVSSPKLAP
1466	0	IEAKNKENFELQAAQEKEKLKVEDEPEVLTEPPSATTTTTI
1467	0	WTTLAGSHGKRNNTITTTSSKRKNRKNKITPENVQIIFDDP
1468	0	SSRKSDNHSPAVVTTTVSSKKQPSVLVTFPKEERKSVSGKA
1469	0	GCNINAIREFTGAHIDIDKQKDKTGDRIITIRGGTESTRQA
1470	0	AQPGGVSRNSPLDCGSASPNKVASSSEQEAGSPPVVETTNT
1471	0	VRVCDLLLKKKPPQQQHHKAKRNRTCRPPSSSESSSDSDNS
1472	0	AIEKNAQLQSLELAHADQLTKEKIEELNKTREEQIQKKQKI
1473	0	IITPPPAKKAKSPSQKKPVSKKAGGKKGARKSKKKQGEVSK
1474	0	IINPTNADIDLKDDLGNTLEKKGGKEFVEAVLELRKKNGPL
1475	0	PSPHSGGVCKPKLISKSNSRKSKSPIPGQGYLGTERPSSVS
1476	0	RNYGKRRGRNQQIARPSQEEKVEEKEEDKAEKTEKKEEEKK
1477	0	SPESDAEREKDKKEKDRESEKDRTRQRSESKHKSPKKKTGK
1478	0	VNLKVSPKRGRPAATEVKIPKPRGRPKMVKQPCPSESDIIT
1479	0	PKRGRPAATEVKIPKPRGRPKMVKQPCPSESDIITEEDKSK
1480	0	NKSLAEQRQHEEANKTKDQGKKGPNKKLEKEQTGSKTLNGG
1481	0	QHNGESNEDSKDNHEASTKKKPSSEERETEISLKDSTLDNX
1482	0	GKPNKRKGFNEGLWEIDNNPKVKFSSQQAATKQSNASSDVE
1483	0	LIDEDYYARVEGREIISNLAKAAGLATMISTMRPDIDNMDE
1484	0	KSAKVRQQAADLISRTAVVMKTCQEEKLMGHLGVVLYEYLG
1485	0	DISIEHFEGTVTKVIPKVPSKNQNDPLPGRIKVDFVIPKEL
1486	0	DDISVISVVEKEILAVVRKEKEETGLKVSLQRNMGNGLLSS
1487	0	GNGLLSSGCSLYESSDLPLMKLPPSNPLPLVPVKVKQETVE
1488	0	TQMTAGVDGHSWALSAIDELKVDKIITPLNKDHIPITDSPV
1489	0	DAMNPSSRDDFTEFGKLLKDKITQYEKSLYYASFLEVLVRD
1490	0	SFLEVLVRDVCISLEIDDLKKITNSLTVLCSEKQKQEKQSK
1491	0	NSLTVLCSEKQKQEKQSKAKKKKKGVVPGGGLKATMKDDLA
1492	0	EAEVKPEVKISEKKKIAEKIKEKERQQKKRQEEIKKRLEEP
1493	0	KHGIKTVSQIISLQTLKKEYKSYEAKLRLLSSFDFFLTDAR
1494	0	SKDDVAPESGDTTVKKPESKKEQTPEHGKKKRGRGKAQVKA
1495	0	SETPKAAESETPGKSPEKKPKIKEEAVKEKSPSLGKKDARQ
1496	0	EEAVKEKSPSLGKKDARQTPKKPEAKFFTTPSKSVRKASHT
1497	0	SQSPEHLLPVLIQAAQLCREKQHTKAIELLQEFSDQHPENA
1498	0	TGNNSSQIQAAMKGFEEVIKKFPRCAEGYALYAQALTDQQQ
1499	0	PGNQSFSNPLNRASGHYFDEKNLQSSQFGNFGNIPAPMTVG
1500	0	EQLIRQQLLAKQKQLLELQQKKLELELEQAKAQLAVSLSVQ
1501	0	QLIRQQLLAKQKQLLELQQKKLELELEQAKAQLAVSLSVQQ
1502	0	QSHRKEFLMNTLNQSDTKTSKTIPSEKLNSSKQEKSKSGEK
1503	0	SDTKTSKTIPSEKLNSSKQEKSKSGEKITKKELDQLDSKSK
1504	0	KTIPSEKLNSSKQEKSKSGEKITKKELDQLDSKSKSKSKSP
1505	0	GEKITKKELDQLDSKSKSKSKSPSPLKNKLSHTKDLKNQES
1506	0	SHTKDLKNQESESMRLSDMNKRDPRLKKHLQDKTDGKDDDV
1507	0	MNSQSSRSHAIFTISLEQRKKSDKNSSFRSKLHLVDLAGSE
1508	0	KIKNKPIVNIDPQTAELNHLKQQVQQLQVLLLQAHGGTLPG
1509	0	KLNQEIRMMKNQRVQLMRQMKEDAEKFRQWKQKKDKEVIQL
1510	0	NFQKQSNVLRRKTEEAAAANKRLKDALQKQREVADKRKETQ
1511	0	AQKLQEELASGKLVEQANSPKHQWGEEEPNSQMEKDHNSED
1512	0	KHRKSSSDSDDEEKKHEKLKKALNAEEARLLHVKETMQIDE
1513	0	ILGVKKNPSSPLYTTLGVITKGTVIEVNVSELGLVTQGGKV
1514	0	VKKIQFKLHESYGNPLRVVTKPPYEITETGWGEFEIIIKIF
1515	0	KAVPKSAVQQVAQKLVQRGKKMKQPKRDAKENTEEASHKCG
1516	0	PGLTNQPGEFDTMQSPSTPIKDLDERTCRSSGSKSRGRGRK
1517	0	GVCRKESSVKTVRSTSKVRKKAKKAKKALAEPCAVLPTVCA
1518	0	LDLTCAMKSSGSRSKRAKLLKKEIALLRNKLSQQHSQPLPT
1519	0	EVDSKPVSQKPPPPSEKVEVKVPPAPVPCPPPSPGPSAVPS
1520	0	TNGETTTQGLDGLSERCAQYKKDGADFAKWRCVLKIGEHTP
1521	0	FSRYDYQRQPDSGISSIRSFKTILPAAAQDVYYRDEIGNVS
1522	0	WAPAPGSASSEAPPLINEDVKRTVDLSSHLAKVTAEVVLAH
1523	0	SVGLGDSRTGEMTVLGHVKHKLVCSPDFESLLDHKHRXXXX
1524	0	GVLRRAKSKNGGRSLREKLDKIGLNLPAGRRKAANVTLLTS
1525	0	NMFESYINNLRRQLETLGQEKLKLEAELGNMQGLVEDFKNK
1526	0	SLRYHNLHPDYIHGRLQSLGKNFALRVLLVQVDVKDPQQAL
1527	0	ACTCPYCKDSEGRGSGDPGKKKQHICHIQGCGKVYGKTSHL
1528	0	RGSGDPGKKKQHICHIQGCGKVYGKTSHLRAHLRWHTGERP
1529	0	KDLLLTSSYLSDSGSTGEHTKSLVTQYLNATGNRWCSWSLS
1530	0	DSDIISKMRGTFADKEKKKEKKKAKTVEQTATTTNKKPGQG
1531	0	DPRDAPPPTRAETREERMERKRREKIERRQQEVETELKMWD
1532	0	TAAENEFVVLKKDVDAAYMSKVELEAKVDALNDEINFLRTL
1533	0	ALPNPAPAVRKKSQEKKTSLKRTSKTNPKKHGSEEAKRGAA
1534	0	PSSGEEAEAASVGEGGGGGRKVGRYRDDGDEDYYKQRLSPK
1535	0	FDTQEQLVHHINNDHIHGEKKEFVCRWLDCSREQKPFKAQY
1536	0	IQHNEGAMECQFNVSLVLEGKKNTCNGGNSEAVPLTSPNIA
1537	0	ANGDKEIGNIISDAMKKVGRKGVITVKDGKTLNDELEIIEG
1538	0	INTSKGQKCEFQDAYVLLSEKKISSIQSIVPALEIANAHRK
1539	0	LIGRTWNDPSVQQDIKFLPFKVVEKKTKPYIQVDIGGGQTK
1540	0	MKATVEDEKLQGKINDEDKQKILDKCNEIINWLDKNQTAEK
1541	0	EDTKKEKKRKLEEEEDGKLKKPKNKDKDKKVPEPDNKKKKP
1542	0	EQLADARRDLKSAKADAKVMKDAKTKKVVESKKKAVQRLEE
1543	0	ARRDLKSAKADAKVMKDAKTKKVVESKKKAVQRLEEQLMKL
1544	0	RRDLKSAKADAKVMKDAKTKKVVESKKKAVQRLEEQLMKLE
1545	0	ALGTSKLNYLDPRITVAWCKKWGVPIEKIYNKTQREKFAWA
1546	0	PSLLRHRFLEEFITPIVKVSKNKQEMAFYSLPEFEEWKSST
1547	0	FYSLPEFEEWKSSTPNHKKWKVKYYKGLGTSTSKEAKEYFA
1548	0	LVVAPAGITLKEANEILQRSKKGKLPIVNEDDELVAIIART
1549	0	VDVVVLDSSQGNSIFQINMIKYIKDKYPNLQVIGGNVVTAA
1550	0	ELESLQNEHAQRMEEFYVEQKDLEKKLEQIMKQKCTCDSNL
1551	0	RMEEFYVEQKDLEKKLEQIMKQKCTCDSNLEKDKEAEYAGQ
1552	0	EREARQKLEMMIKELKLQILKSSKTAKEXXXXXXXXXXXXX
1553	0	KRKMPFTEKIMATPEQVGKMKAIVEKLRFTYRSDSFENPVL
1554	0	PGGDATVTISHRYTPKEQLKKHTILADIVISAAGIPNLITA
1555	0	RERNKLAAAKCRNRRRELTEKLQAETEELEEEKSGLQKEIA
1556	0	AAGTGLQGLQTDIQTDNDLTKEMYEGKENVSFELQRDFSQE
1557	0	IGMQEIALHSGEEPHAEEHLKGDFYESEHGINIDLNINNHL
1558	0	KDDYEIFVKVKDTHEKSKKNKNRDKGEKEKKRDSSLRSRSK
1559	0	DKGEKEKKRDSSLRSRSKRSKSSEHKSRKRTSESRSRARKR
1560	0	VLEPPVVSMEVSEPHILETLKPATKTAELSVVSTSVISEQS
1561	0	TGVQVLTQEQLANTGAQAWIKKDQFLRAAPVTGGMGAVLMR
1562	0	MGAVLMRKMGWREGEGLGKNKEGNKEPILVDFKTDRKGLVA
1563	0	PPGLSEEEEALQKKFNKLKKKKKALLALKKQSSSSTTSQGG
1564	0	KREIRLMKNREAARECRRKKKEYVKCLENRVAVLENQNKTL
1565	0	KRRRERNKIAAAKCRNKKKEKTECLQKESEKLESVNAELKA
1566	0	NKIAAAKCRNKKKEKTECLQKESEKLESVNAELKAQIEELK
1567	0	KESEKLESVNAELKAQIEELKNEKQHLIYMLNLHRPTCIVR
1568	0	YRQKKRAEQEALTGECKELEKKNEALKERADSLAKEIQYLK
1569	0	TSDGIIQKNSYRYDHSVSNDKALMVLTEEPLLYIPPPPCQP
1570	0	NQEEKKTPSKPPAQLSPSVPKRPKLPAPTRTPATAPVPARA
1571	0	KPTQAAGPSSPQKPPTPEETKAASPVLQEDIDIEGVQSEGQ
1572	0	EDDDDEDDEEEEEEEEEEPVKEAPGKRKKEMAKQKAAPEAK
1573	0	XXXXMSGDEMIFDPTMSKKKKKKKKPFMLDEEGDTQTEETQ
1574	0	XXXMSGDEMIFDPTMSKKKKKKKKPFMLDEEGDTQTEETQP
1575	0	ETKAIPVSQQMEGPHLPNKKKHKKQAVKTEPEKKSQSTKLS
1576	0	DFLLDALSEDFSGPQNASSLKFEDAKLAAAISEVVSQTPAS
1577	0	AIKPPQQMSRKEKAHHRKDEKRKEKRRHRSHSAEGGKHARV
1578	0	EKRRHRSHSAEGGKHARVKEKEREHERRKRHREEQDKARRE
1579	0	RKPGEARPAPAQKPAQLKEEKMEERDLLSDLQDISDSERKT
1580	0	EKMEERDLLSDLQDISDSERKTSSAESSSAESGSGSEEEEE
1581	0	GVVYRAKDKKTDEIVALKRLKMEKEKEGFPITSLREINTIL
1582	0	EHDLKSLMETMKQPFLPGEVKTLMIQLLRGVKHLHDNWILH
1583	0	LFPEFRPGKVLRFLRLFGPGKNVPSVWRSARRKRKKKHREL
1584	0	RLFGPGKNVPSVWRSARRKRKKKHRELIQEEQIQEVECSVE
1585	0	FLMVTQLHWEDDIIWDGEDVKHKGTKPQRASLAGWLPSSMT
1586	0	IYRLFWKSKDRPRRIRMEDIKKAFPSHSESSIRKRLKLCAD
1587	0	CGEGFSYVKIPNKPTQQKDDKEPQPVKKTVTGTDADLRRLS
1588	0	PTSVAIASIQSAATFPDPNVKYVFRTENGGQVMYRVIQVSE
1589	0	AKGKPNSAKKRVVKAEKSKKKKEEEEDEEDEQEEENEEDDD
1590	0	KPDQPLKVMPAPPPKENAWVKRSSNPPARSQSSDTEQQSPT
1591	0	NHARSPGNKGKGKGKGKGKPKSQACEPSEPEIEIKLPKLRT
1592	0	WFQRQLRGAQYQPILRDHICKDMSALVAARMRHIPLAPGSD
1593	0	KNGRSSSGALRGVCSCVEAGKACDPAARQFNTLIPWCLPHT
1594	0	GRLEWDGFFSTTVTNPEPMGKQGRVLHPEQHRVVSVRECAR
1595	0	LTRGAKEEHGGLIRSPRHEKKKKVRKYWDVPPPGFEHITPM
1596	0	TFVDHRCVATVGYQPQELLGKNIVEFCHPEDQQLLRDSFQQ
1597	0	IKHVPGGGNVQIQNKKVDISKVSSKCGSKANIKHKPGGGDV
1598	0	KNVVLPTETEVAPAKDVTLLKETERASPIKMDLAPSKDMGP
1599	0	ASPIKMDLAPSKDMGPPKENKKETERASPIKMDLAPSKDMG
1600	0	SKDMGPPKENKKETERASPIKMDLAPSKDMGPPKENKIVPA
1601	0	DVVGETVGKTDYIPLLDVDEKTGNSESKKKPCSETSQIEDT
1602	0	VGQSAAPTFMISPETVTGTGKKCSLPAEEDSVLEKLGERKP
1603	0	GQSAAPTFMISPETVTGTGKKCSLPAEEDSVLEKLGERKPC
1604	0	TQPTSLPKQPAPTTIGGLNKKPMSLASGLVPAAPPKRPAVA
1605	0	SARPSILPSKDVKPKPIADAKAPEKRASPSKPASAPASRSG
1606	0	AKSVPADLSRPKSTSTSSMKKTTTLSGTAPAAGVVPSRVKA
1607	0	RSNTANRLMKTLSKLNLCVDKTEKGESSSPSPSAEKGKILN
1608	0	TANRLMKTLSKLNLCVDKTEKGESSSPSPSAEKGKILNVSV
1609	0	VSVIEESGNKNDQKSQKIMKKKESSSMLATVKEEVSGSSAA
1610	0	LSRALRYYYVKNIIKKVNGQKFVYKFVSYPEILNMDPMTVG
1611	0	LRYYYVKNIIKKVNGQKFVYKFVSYPEILNMDPMTVGRIEG
1612	0	ITDLQNGNDQTRRRLAVYCLKDAYLPLRLLERLMVLVNAVE
1613	0	PRLFELLEKEILYYRKTIGYKVPRNPDIPNPALAQREEQKK
1614	0	KNGTGQSSDSEDLPVLDNSSKCTPVKHLNVSKPQKLARSPA
1615	0	SSDDEDGPAEENDEEKEKEAKKTEEEVPEEELDPEERDNFL
1616	0	LYKFMEDRGTPINKPPVLGYKDLNLFKLFRLVYHQGGCDNI
1617	0	SAKYRGAFCEAKIKTVKRLVKVKVLLKQDNTTQLVQDDQVK
1618	0	DYETAEKKENELLLGRKNTPKQKEKKIKKQEDSDKDSDEEE
1619	0	ETAEKKENELLLGRKNTPKQKEKKIKKQEDSDKDSDEEEEK
1620	0	KVKVLLKQDNTTQLVQDDQVKGPLRVGAIVETRTSDGSFQE
1621	0	KCDSEGEEDEEDMEPCLTGTKVKVKYGRGKTQKIYEASIKS
1622	0	KKCLRYRYPLEDLPSLLYGVKVRAQSYDTWVSRVTEALSAN
1623	0	IGAGVTLHEALAAAELLKKEKINIRVLDPFTIKPLDRKLIL
1624	0	HVVFGLVISGFEVIEQIENLKTDAASRPYADVRVIDCGVLA
1625	0	DVRVIDCGVLATKSIKDVFEKKRKKPTHSEGSDSSSNSSSS
1626	0	STARHSGHHKKRRKEKKVKHKKKGKKQKHCRRHKQTKKRRI
1627	0	LGKTTGKKLCYKGSTFHRVVKNFMIQGGDFSEGNGKGGESI
1628	0	QSAQEKEKQGQMERTHNKQEKNRGEEKSKSERECPHSKKRT
1629	0	ELNRWRNGETVPIDEQFDKEKANLEAFTVDKDITLTNDKPA
1630	0	TLASIDAELQKLKEMTNHQKKRAAEMMASLLKDLAEIGIAV
1631	0	QPEGTGMIDEEFTVARLYISKMKSEVKTMVKRCKQLESTQT
1632	0	ENEKELAACQLRISQHEAKIKSLTEYLQNVEQKKRQLEESV
1633	0	AFDRVFQSSTSQEQVYNDCAKKIVKDVLEGYNGTIFAYGQT
1634	0	FDRVFQSSTSQEQVYNDCAKKIVKDVLEGYNGTIFAYGQTS
1635	0	ELVQLRAQEKVHEMEKEHLNKVQTANEVKQAVEQQIQSHRE
1636	0	EKVHEMEKEHLNKVQTANEVKQAVEQQIQSHRETHQKQISS
1637	0	VFQSSTSQEQVYNDCAKKIVKDVLEGYNGTIFAYGQTSSGK
1638	0	ANEVKQAVEQQIQSHRETHQKQISSLRDEVEAKAKLITDLQ
1639	0	MLEQERLRVEHEKLKATDQEKSRKLHELTVMQDRREQARQD
1640	0	ELQTLHNLRKLFVQDLATRVKKSAEIDSDDTGGSAAQKQKI
1641	0	AQKQKISFLENNLEQLTKVHKQLVRDNADLRCELPKLEKRL
1642	0	PRTGIVDISILTTGMSATSRKRKEELAEALKKLILSKGKTP
1643	0	KNGNEKEVKEYAQVFREHANKLIEVANLACSISNNEEGVKL
1644	0	AKPQSKLAQENMDLFKEQWEKQVRVLTDAVDDITSIDDFLA
1645	0	SKKAHVLAASVEQATENFLEKGDKIAKESQFLKEELVAAVE
1646	0	SAMSLIQAAKNLMNAVVQTVKASYVASTKYQKSQGMASLNL
1647	0	LVKREKQDETQTKIKRASQKKHVNPVQALSEFKAMDSIXXX
1648	0	PSPFSKLDPKVKAAFTRAYNKEAHLTPYSLQAIKASRHSTS
1649	0	DVARKVFAAGEETAHMSLVDKSDLFFHDYSIAPLFVQENYI
1650	0	DSDSESEETLQVKNAKKPPEKLPVSSKPGKISRQDPVTYIS
1651	0	QLAVGKQNGTVVQYLPTLQEKKVIPCPPFYESDHPVRVLDV
1652	0	SSSPVPSMVQKSPRITPPAAKPGSPQAKSLQPAVAEKQGHQ
1653	0	SVYSVQEEPLNLSCAKKEPQKDSCVTDSEPVVNVIPPSANP
1654	0	QETSLSVQLSNLGTVRTLRTKQRIQPQKTSVYIELGSDSSE
1655	0	CNKSKQPGLARSQHNRWAGSKETCNDRRTPSTEKKVDLNAD
1656	0	PGTDYGTQESISLLEVSTLGKAKTEPNKCVSQCAAFENPKG
1657	0	TKNTTADKLAIKLGFSLTPSKGKTSGTTSSSSDSSAESDDQ
1658	0	NTTADKLAIKLGFSLTPSKGKTSGTTSSSSDSSAESDDQCL
1659	0	LFGLPEAAGARDSRDNPLRKKKAANLNSIIHRLEKAASREE
1660	0	FGLPEAAGARDSRDNPLRKKKAANLNSIIHRLEKAASREEP
1661	0	NSTLKQLEEKLKGQADYEEVKKELNILKSMEFAPSEGAGTQ
1662	0	KMNFGDFLTVMTQKMSEKDTKEEILKAFKLFDDDETGKISF
1663	0	RLQPDPEPTEEDIEKNPELKKLQIYGAGPKMMGLGLMAKDK
1664	0	EAEREAFELLPDDERQCIKCKTTCFLSALACYDCPDGLVCL
1665	0	NMNYDKLSRALRYYYDKNIIKKVIGQKFVYKFVSFPEILKM
1666	0	EHETNGVAKSDQKQEQLLLKKMYLMLDNKRKEVVHKIIELL
1667	0	SFVVERQPCMPTHPQRPLVLKTGVQFTVKLRLLVKLQELNY
1668	0	PDGIPLLDPIDDMGIQDQGLKKVIQKVEAFEHRMYSHPLHN
1669	0	IKSAKRELKKARTVLQMDELKCRKRVLRRLGFATSSDVIEM
1670	0	NKSSKESSKKPKENKPLKEEKIVPKMAFKEPKPMSKEPKPD
1671	0	PMSKEPKPDSNLLTITSGQDKKAPSKRPPISDSEELSAKKR
1672	0	PPLILTCSADKKQIKDKSHVKMGKVKIESETSEKKKSTLPP
1673	0	PLLKTNNNQILEVKSPIKQSKSDKQIKNGECDKAYLDELVE
1674	0	FVEKVVFHLHESFPRPKRVCKDPPYKVEESGYAGFILPIEV
1675	0	LSQEPAKKVKAKKKHTNAEKKLADRESALASADLEEEIHQK
1676	0	RESALASADLEEEIHQKQGQKRKNSQPGVKVADRKILDDTE
1677	0	LEEEIHQKQGQKRKNSQPGVKVADRKILDDTEDTVVSQRKK
1678	0	EGHPKSLFIGEKAVLLKTKKKGQKKSGRPKKQRKQKXXXXX
1679	0	PKTGFYCKLCSLFYTNEEVAKNTHCSSLPHYQKLKKFLNKL
1680	0	DLPEWKERGTGDVKLLKHKEKGAIRLLMRRDKTLKICANHY
1681	0	SKKIRDKTSKKKDELSDYAEKSTGKGDSCDSSEDKKSKNGA
1682	0	RLLRHKLTVSDGESGEEKKTKPKEHKEVKGRNRRKVSSEDS
1683	0	LRHKLTVSDGESGEEKKTKPKEHKEVKGRNRRKVSSEDSED
1684	0	GVSEEVSESEDEQRPRTRSAKKAELEENQRSYKQKKKRRRI
1685	0	EEEEEEDENDDSKSPGKGRKKIRKILKDDKLRTETQNALKE
1686	0	LVTACNSVFENLEQLLQQNKKKIKVDSEKSNKVYEHTSRFS
1687	0	LEQLLQQNKKKIKVDSEKSNKVYEHTSRFSPKKTSSNCNGE
1688	0	SVTYSYSALIVPKEMIKKAKKLIETTANMNSSYVKFLKQAT
1689	0	ESSSVKLNISSKDNRGGIKSKTTAKVTKELYVKLTPVSLSN
1690	0	RPTETNPVTSNSDEECNETVKEKQKLSVPVRKKDKRNSSDS
1691	0	TETNPVTSNSDEECNETVKEKQKLSVPVRKKDKRNSSDSAI
1692	0	KDKRNSSDSAIDNPKPNKLPKSKQSETVDQNSDSDEMLAIL
1693	0	DFDSSEDEKHSKKGMDNQGHKNLKTSQEGSSDDAERKQERE
1694	0	AAVADPDEFERIYEPLDVKSKKIHVVDSGLTFNLPYPLILR
1695	0	QSFSSRLQTVALSQQIRQSLKEQGYALSHDSLKVEKDLRCY
1696	0	ESPSTNRTTPVSTPPLLTSSKAGSPINLSQHSLVIKWNSPP
1697	0	ERRTVLQLLLGNPNKGKSEKKEKTPLRDESTQEHSERALSE
1698	0	RTVLQLLLGNPNKGKSEKKEKTPLRDESTQEHSERALSEQI
1699	0	LPVSEDFKSEPVSPQDFSFSKNGLLSRLLRQNQDSYLADDS
1700	0	EESFQMWELNRRLEAYLARVKALEEQNELLSAELGGLRAQS
1701	0	DVEVVRPLEKEAVGQLKPTGKEDTQTLQSLQKENQELMKSL
1702	0	PVDISDSDMMLNIINSSITTKAISRWSSLACNIALDAVKMV
1703	0	TTKAISRWSSLACNIALDAVKMVQFEENGRKEIDIKKYARV
1704	0	SDQGLGGVMVLSQRQHEIILKAAQELKMLREQKEQLQKMKD
1705	0	GLSLKLGASNSPGQPNSVKRKKLPVDSVFNKFEDEDSDDVP
1706	0	QMTSPSSTGSPMFKFSSPIVKSTEANVLPPSSIGFTFSVPV
1707	0	IIKNEVKKLQKAALLKASPKKAPGTKGTAAAAAAAAAAKVP
1708	0	GTKGTAAAAAAAAAAKVPAKKITAASKKAPAQKVPAQKATG
1709	0	AAAAAAAAAKVPAKKITAASKKAPAQKVPAQKATGQKAAPA
1710	0	VRQAWQKADINTKWAATRWAKKIEARERKAKMTDFDRFKVM
1711	0	MDAQVKAIADTGANVVVTGGKVADMALHYANKYNIMLVRLN
1712	0	EVFIQLPSRKELPEYYELIRKPVDFKKIKERIRNHKYRSLN
1713	0	EEEEQPQAAQPPTLPVEEKKKIPDPDSDDVSEVDARHIIEN
1714	0	AHAVTERVDKQSALMVNGVLKQYQIKGLEWLVSLYNNNLNG
1715	0	VLPPPRESHTAVVYTEKDNKKSKLVIYGGMSGCRLGDLWTL
1716	0	HVTTKLVPSIKRLHNCDTILKHTLNSHNHNRNSATKNLGKI
1717	0	IFGNGNNFPHSPSSTKNENAKTGANSCEHDHYEKHLSHKQA
1718	0	KMKGYPHWPARIDEMPEAAVKSTANKYQVFFFGTHETAFLG
1719	0	LFIGGLSFETTDDSLREHFEKWGTLTDCVVMRDPQTKRSRG
1720	0	SVFSVTIHMKETTIDGEELVKIGKLNLVDLAGSENIGRSGA
1721	0	SVTIHMKETTIDGEELVKIGKLNLVDLAGSENIGRSGAVDK
1722	0	TKLQLVKEEYITSALESTEEKLHDAASKLLNTVEETTKDVS
1723	0	SLEMILSPTVVSILKINSQLKHIFKTSLTVADKIEDQKKEL
1724	0	RQGDRKGQIKEDGCPSDPTSKQVEGIEIVELQLSHVKDLFH
1725	0	PGQETAEEENVEKEEKSDTQKDSQKAVDKGQGAQRLEGDVV
1726	0	TAEEENVEKEEKSDTQKDSQKAVDKGQGAQRLEGDVVSGTE
1727	0	VSTNISTKHQCITAMKEYESKSLEELRLEDYQANRKGPQNQ
1728	0	ELVSSSSSGSDSDSEVDKKLKRKKQVAPEKPVKKQKTGETS
1729	0	SGIFGKGSAYSRHNAERLFKKLILDKILDEDLYINANDQAI
1730	0	PPPTTPISVSSSGASGAPPTKPPTTPVGGGNLPSAPPPANF
1731	0	MKAAAKVVESKRTRTITSQDKPSGNDVEMETEANLDTRKSV
1732	0	QQDLNKKERRVGTPQSTKKKKESRRATESRIPVSKSQPVTP
1733	0	SRRATESRIPVSKSQPVTPEKHRARKRQAWLWEEDKNLRSG
1734	0	LANDCEVLTTLTPDTGRILSKLHTVQPKGKITFCTGIRVAH
1735	0	STAGAVPVRNEKGEISMEKVKVKRYVSGKRPDYAPMESSDE
1736	0	RNEKGEISMEKVKVKRYVSGKRPDYAPMESSDEEDEEFQFI
1737	0	QGTTPPIWHLTDKKRERMQIKRNTNSVPETAPAAIPETKRN
1738	0	HSTDRVVLIGGKPDRVVECIKIILDLISESPIKGRAQPYDP
1739	0	XXMGISRDNWHKRRKTGGKRKPYHKKRKYELGRPAANTKIG
1740	0	GGEDKLKMIREYRQMVETELKLICCDILDVLDKHLIPAANT
1741	0	IEDNNTLVFIVDVKANKHQIKQAVKKLYDIDVAKVNTLIRP
1742	0	RTKKNKEEAAEYAKLLAKRMKEAKEKRQEQIAKRRRLSSLR
1743	0	LISKLQDEFENRTRNVDVYDKRENPLLPEEEEQRAIAKIKM
1744	0	MAQGMRSDFFLEGPFMPPRMKMDRDPLGGLADMFGQMPGSG
1745	0	KGGEKKEAVAAEVKNEEEDQKEDEEDQNEEKGEAGKEDKDE
1746	0	EKGEEDGKEDKNGNEKGEDAKEKEDGKKGEDGKGNGEDGKE
1747	0	GEEDGKEDKNGNEKGEDAKEKEDGKKGEDGKGNGEDGKEKG
1748	0	KEDKNGNEKGEDAKEKEDGKKGEDGKGNGEDGKEKGEDEKE
1749	0	DYNENAKNGEAKITEAPASEKEIVEVKEENIEDATEKGGEK
1750	0	LSPQEPPRPPEAENSSPDSGKQLVHYTAQPLFLLDPGSVDT
1751	0	EGDGFAEDPTISLLTGSEPPKAKDPTVSXXXXXXXXXXXXX
1752	0	SQSMISSIVNSTYYANVSAAKCQEFGRWYKHFKKTKDMMVE
1753	0	LGLFGYWQTEEYQPPVAVDGKVPRNEFGNVYLFLPSMMPIG
1754	0	PNHVVAKSRFWYFVSQLKKMKKSSGEIVYCGQVFEKSPLRV
1755	0	VEKKKKEKVLATVTKPVGGDKNGGTRVVKLRKMPRYYPTED
1756	0	PDYPMLPTIPLSAFSDPKKTKPSHGSKDANKESSKTSKPHK
1757	0	EDEVLLDEEDEDNDITGKTGKEPVTSNLHEGNPEDDYEETS
1758	0	ELSSFSTSHVPEELKQPLHRKSKSQAYAMMLSLSDKESLHS
1759	0	SDLETTSGSDLESDIESDKEKFKENGKMFKDKVSPLQNLAS
1760	0	GSLQHARPTPFFMDPIYRVEKRKLTDPLEALKEKYLRPSPG
1761	0	TKYEMYSKNAEKPSRSKRTIKQKQRRKFMAKPAEEQLDVGQ
1762	0	EKPSRSKRTIKQKQRRKFMAKPAEEQLDVGQSKDENIHTSH
1763	0	EHEEMGNDCVSKKQMPPVGSKKSSTRKDKEESKKKRFSSES
1764	0	CVSKKQMPPVGSKKSSTRKDKEESKKKRFSSESKNKLVPEE
1765	0	KQMPPVGSKKSSTRKDKEESKKKRFSSESKNKLVPEEVTST
1766	0	TKHHSVAEEETLEKHLRPKQKPKNSKHCRDAKFEGTRIPHL
1767	0	LEKHLRPKQKPKNSKHCRDAKFEGTRIPHLVKKRRYQKQDS
1768	0	ENKSEAKEQSNDDYVLEKLFKKSVGVHSVMKHDAIMDGASP
1769	0	HPSSTSPTEKCQDGIMKKEGKDNVPEHFSGRAEDADSSSGP
1770	0	FQAHTDGQASTREILQEFESKLSASQSCVFRELLRNLCTFH
1771	0	EYRSVLDDLTSCTTSLRQINKIIEQLSPQAATSRDINRKLD
1772	0	KARVLSKKEERLKKHIKKLQKRALQFQGKVGLPKARRPWES
1773	0	EADLSGDGTDYELKPLPKGGKRQKKVPVQEIDDDFFPSSGE
1774	0	GYWKRSGKMIVVESLLKIWHKQGQRVLLFSQSRQMLDILEV
1775	0	QSFLVLDEQRFAKEILPKYFKHNNMASFVRQLNMYGFRKVV
1776	0	RERGRRSRSTSKTRDKKKEDKEKKRSKTPPKSYSTARRSRS
1777	0	EKLQEDKPTFKKEEIKDEKIKKDKEPKEEVKSFMDRKKGFT
1778	0	KLKHTENTFSRPGGRASVDTKEAEGAPQVEAGKRLEELRRR
1779	0	RHFGKAPGTPHSHTKPYVRSKGRKFERARGRRASRGYKNXX
1780	0	YLDLFSHKNMKLKERVLIPVKQYPKFNFVGKILGPQGNTIK
1781	0	VQDSYEAYGQDDWNGTRPSLKAPPARPVKGAYREHPYGRYX
1782	0	VSEMLVIQHRERRERSRSRRKQHLLPPCVDEPELLFSEGPS
1783	0	QVVAIPNNANIHSIITALTAKGKESGSSGPNKFILISCGGA
1784	0	VAIPNNANIHSIITALTAKGKESGSSGPNKFILISCGGAPT
1785	0	NLDVVISLLAFGVYPNVCYHKEKRKILTTEGRNALIHKSSV
1786	0	ISAKGMTLVTPLQLLLFASKKVQSDGQIVLVDDWIKLQISH
1787	0	AAACITGLRAAMEALVVEVTKQPAIISQLDPVNERMLNMIR
1788	0	GLHGNWTLENAKARLNQYFQKEKIQGEYKYTQVGPDHNRSF
1789	0	YTQVGPDHNRSFIAEMTIYIKQLGRRIFAREHGSNKKLAAQ
1790	0	ILEAISQNSVVIIRGATGCGKTTQVPQFILDDFIQNDRAAE
1791	0	TFSSIEREEYGKLFDFVNAKKLNIKNRGLKEGMNPSYDEYA
1792	0	DSNASASSSSNEGDSDRDEKKRKQLKKAKMAKDRKSRKKPV
1793	0	NASASSSSNEGDSDRDEKKRKQLKKAKMAKDRKSRKKPVEV
1794	0	SSSSNEGDSDRDEKKRKQLKKAKMAKDRKSRKKPVEVKKGK
1795	0	KAKMAKDRKSRKKPVEVKKGKDPNAPKRPMSAYMLWLNASR
1796	0	KKEEWDRKAEDARRDYEKAMKEYEGGRGESSKRDKSKKKKK
1797	0	DYEKAMKEYEGGRGESSKRDKSKKKKKVKVKMEKKSTPSRG
1798	0	YEGGRGESSKRDKSKKKKKVKVKMEKKSTPSRGSSSKSSSR
1799	0	FKSKEFVSSDESSSGENKSKKKRRRSEDSEEEELASTPPSS
1800	0	WRRVALGHGLKLLTKNGHVYKYDGFRESEFEKLSDFFKTHY
1801	0	LLTKNGHVYKYDGFRESEFEKLSDFFKTHYRLELMEKDLCV
1802	0	VLNFLEVHDKGALRGYVCAIKVEKFCCAVFAKVPSSWQVKD
1803	0	AGKVTLGTQQRQEMDPRLREKQNEIILRAVCALLNSGGGII
1804	0	LFTKASEVEKYKDRLLTAMRKRKLSQLHEESDLLLQIGDAS
1805	0	EDLENNGSKKDGVCGPPPSKKMKLFGFKEDPFVFIPEDDPL
1806	0	TSDANETEDHLESLICKVGEKSACSLESNLEGLAGVLEADL
1807	0	KVFQCRRATPATEAGFEDEAKTSARDAALAYHRLHQLHITG
1808	0	HSFVDSVGVMSPPLSRSSVLKSALGPDIICRWWTSAITVAI
1809	0	GRFKTNYAVERKIEPFYKGGKAQLDQTGQHLFCVCGTRVNI
1810	0	AQCNTAYQCLLIADQHCRTRKYFLCLASGIPCVSHVWVHDS
1811	0	NEKRRGLKYELISETGGSHDKRFVMEVEVDGQKFQGAGSNK
1812	0	LEASLPMISFKQEELENEGLKPREEPQSAAEQDVVVQETFN
1813	0	LQRDQERLGKQLKLRAEREEKEKLKEEAKRAKEEAKKKKEE
1814	0	KKKKEEEKELKEKERREKREKDEKEKAEKQRLKEERRKERQ
1815	0	FNSDVVIVERGKGDGVPERRKFGRMKLLQFCENHRPAYWGT
1816	0	ASLDTLENNCHVGSDIDFRPKLVNGKGPLDNFLRNRIETSI
1817	0	WKKKHSHRQNKKKQLRKQLKKPEWQVERESISRLMQNYEKI
1818	0	DLKERAQRCFVSYVRSVYLMKDKEVFDVSKLPIPEYALSLG
1819	0	KERAQRCFVSYVRSVYLMKDKEVFDVSKLPIPEYALSLGLA
1820	0	FVSYVRSVYLMKDKEVFDVSKLPIPEYALSLGLAVAPRVRF
1821	0	RFLQKMQKQPTKELVRSQADKVIEPRAPSLTNDEVEEFRAY
1822	0	KKMTKVAEAKKVMKRNFKVNKKITFTDEGELVQQWPQMQKS
1823	0	LPDPDKYRSSEDSDSEDMENKISDTKKKQGMKKRSNSEVED
1824	0	KEFTNVYIKNFGEEVDDESLKELFSQFGKTLSVKVMRDPNG
1825	0	LEIDNSELLHMLESPESLRSKVDEAVAVLQAHHAKKEAAQK
1826	0	PYLIRRIEELNKTANGNVEAKVVCFYRRRDISSTLIALADK
1827	0	ENLIGISCASHFLKREMQKTKELMTKVNKQKLFEKSTGLPH
1828	0	ESRKRKLSGDQPAARTPRSKKKKKLGAGEGGEASVSPEKTS
1829	0	GPPPPPGDENREMDDPSVGPKIPQALEKILQLKESRQEEMN
1830	0	VHLKATRNSVPVPRHWCFKRKYLQGKRGIEKPPFELPDFIK
1831	0	GDLSDELRISLGMPVGPNAHKVPPPWLIAMQRYGPPPSYPN
1832	0	LEPSDEESSEEEEEEESDEDKPDETGFITPADSGLITPGGF
1833	0	GGFSSVPAGMETPELIELRKKKIEEAMDGSETPQLFTVLPE
1834	0	KKDELDSLITAITTNGAHPSKCVTIQRTLDGRLQVAGRKGF
1835	0	PSPFGHLSEGFSHSRWLRKVKHGHFGWPGWEMGPPGNWSPR
1836	0	PGPTAESASGPSEDPSVNFLKNVGESVAAALSPLGIEVDID
1837	0	FALARQISREVTYKYTYRTTKSKCGERDELSPKRIKVEDGF
1838	0	GIEIVKEKTTRSKSKERKKSKSPSKRSKSQDQARKSKSPTL
1839	0	DRRSRSKERKSKRSETDKEKKPIKSPSKDASSGKENRSPSR
1840	0	HKQHLCLVFEPLSMNLREVLKKYGKDVGLHIKAVRSYSQQL
1841	0	PTKDLLADLIGCQRLPEDQRKKVHQLKDLLDQILMLDPAKR
1842	0	VDSEGKIKYDAIARQGQSKDKVIYSKYTDLVPKEVMNADDP
1843	0	SVLHLTFYYLMNLNIMTVKAKVTTAMELITPISAGDLLSPD
1844	0	TCQELQRLMAEIQDLKSRGGKDVAIEIEERRIQSCVHFMTL
1845	0	HRLSRSRSRHSSISPSTLTLKSSLAAELNKNKKARAAEAAR
1846	0	VQSKYANGETSKGDELRFGPKPMRIKEDILACSAAELNYGL
1847	0	KLRFSGVEKSFCSEGCVLLYKQDFTKKLGLCCITCTYCSQT
1848	0	RSIPQFPVPPKSQKAQGLRNKPCIGKQVNNLVDSSGHSVGC
1849	0	STTAPVANTQGPNHKMVSQNKERNAVSFPNLDSPNVSSTLK
1850	0	FAGSQRARTRTGIAEIKRQRKLASQTAPASAELLTLPYLSG
1851	0	LQQENLISTCQTFILESSDLKEYAEHCTDEGFIPACLLSLF
1852	0	RGGDGAVRSETAPDSYKVQDKKNASSRPASAISGQNNNHSG
1853	0	RENVLFLTSGTRRAVSPSNPKARQPARSRLWLPSKSLPHLP
1854	0	PEEATRLLAEKRRLAREQREKEERERREQEELERQKREELA
1855	0	HESQRDYSKGFGGKYGIDKDKVDKSAVGFEYQGKTEKHESQ
1856	0	PQSHSSEQIQAIKEEEEEKGKPRGEEIPTQKPDQXXXXXXX
1857	0	TPNKFKKYSRRSWDQQIKLWKVALHFWDPPAEEGCDLQEIH
1858	0	AIAVILTNFHDGRPLPIERVKKNLLKKEYNVNDDSMKLGGN
1859	0	KVIEDVAFACALTSSVPTTKKKMLKKGACAVEGSKKTDVEE
1860	0	RERNKVKSRYRSRSRSQSPPKDRKDRDKYGERNLDRWRDKH
1861	0	AVAMAGALIGSEPGPAEELAKLEYLSLVSKVCTELDNHLGI
1862	0	RQIAANMRGIGMMPNDIPEWKKHAFGGNKASYGKKTQMSIL
1863	0	TVQKRQDMKLIVTSATLDAVKFSQYFYEAPIFTIPGRTYPV
1864	0	QQPATEEASSAARRGATVEAKQSEAEVVTEIQLEKDQPLVK
1865	0	LEGQLTKQEERKTEAEERDQKGEKKNQKRNEKKNQKGQEEV
1866	0	LVSLGPEEQFTVLSLSAGRPKRPHARRALCLLLGPDFFTDV
1867	0	EQEARGRLERQKILDQSEAEKARKELLELEALSMAVESTGT
1868	0	ESRAEAARIEGEGSVLQAKLKAQALAIETEAELQRVQKVRE
1869	0	KAEDCWELQISPELLAHGRQKILDLLNEGSARDLRSLQRIG
1870	0	KGRPRKKKPCPQRRDSFSGVKDSNNNSDGKAVAKVKCEARS
1871	0	MFQAAQKLGGYETITARRQWKHIYDELGGNPGSTSAATCTR
1872	0	QENENKTKVSGTKRIKHEIPKSKKEKENAPKPQDAAEVSSE
1873	0	KEKENAPKPQDAAEVSSEQEKEQETLISQKSIPEPLPAADM
1874	0	IAELQLLWEERTSRQLLSSSKLYFLPEDTPQGRNSDHGEDE
1875	0	CSVRGGEELVLTGSNFLPDSKVVFIERGPDGKLQWEEEATV
1876	0	KPTQSSLTRGGSGRISALQGKLSKLDYRDITKQSQETEARP
1877	0	TLAEQNTKNPKSTTGRSSKSKEEPLFPFNLDEFVTVDEVIE
1878	0	ALVTVDEVIDEEELNMEEMVKNSNSLFTLDELIDQDDCISH
1879	0	EDDTLSECKQVSDKAVSLQRKLRKEQSLHYGSVLLITELPE
1880	0	KSVKICVPGKKKAQNKEVKKKTLESKKVSASTLKRDADASK
1881	0	SASSVKSVVTVAVKGNKASIKTAKSGGKKSLEAKKTGNVKN
1882	0	TPVTVKAQTKAPPKPARAAPKIANGKAASSSSSSSSSSSSD
1883	0	SSSSSSSSDDSEEEKAAATPKKTVPKKQVVAKAPVKAATTP
1884	0	KKPPTKAVVSKATTKPPPAKKAAESSSDSSDSDSSEDDEAP
1885	0	GATQQDANASSLLDIYSFWLKSAKVPERKLQANGPVAKKAK
1886	0	DKNESLTMRLHETLKQCQDLKTEKSQMDRKINQLSEENGDL
1887	0	LHETLKQCQDLKTEKSQMDRKINQLSEENGDLSFKLREFAS
1888	0	QVANEARDSAQTSVTQAQREKAELSRKVEELQACVETARQE
1889	0	SPECLVSAQKVLEGSELELAKMTMLLLYHSTMSSKSPRDWE
1890	0	FTNTQITEHYSTCIKLSTENKITTKNAFGLHLIDFMSEILK
1891	0	HLIDFMSEILKQKDTEPTNFKVAAGTLDASTKIYAVRVDAV
1892	0	GHPHSASSPSERVFPMPLPRKAPLNIPGTPVLEDFPQNDDE
1893	0	NIDVNEELPARRKRNREDGEKTFVAQMTVFDKNRRLQLLDG
1894	0	RKRNREDGEKTFVAQMTVFDKNRRLQLLDGEYEVAMQEMEE
1895	0	NQMNHACMLFVENYGQKIIKKNLCRNFMLHLVSMHDFNLIS
1896	0	LSCNSVSEGGFADSDSHSSFKTNEGGEGRAGGSRMEAEKAS
1897	0	KSSSQDLHKGTLSQMSGELSKDGDLIVSMRILGKKRTKTWH
1898	0	RKRVLKSKTYLDGEGCIVTEKVYESESCTDSEEELNMKTSS
1899	0	HRPPAMTVKKEPREERKGPKKGTAALGKANRQVSITGFFQR
1900	0	PFSASGKKQAAKSKEELAQEKKKELEKRLQDVSGQLSSSKK
1901	0	LYSCSDDKHIVEWNVQTCKVKCKWKGDNSSVSSLCISPDGK
1902	0	KCKWKGDNSSVSSLCISPDGKMLLSAGRTIKLWVLETKEVY
1903	0	LTSNCTIQIATPGKGKKSTPKPIPILAAGFCSDKMSLLLVY
1904	0	MCLVRDISNCWAPKVETAITKVRTPVMNSEAKVLVPGIPGH
1905	0	CLAWAPARLQAKESPQRKKRKSEAVGMSNQTDLLALGTAVG
1906	0	NDGVCQSMCHDKYTKIFNDFKDRMKSDHKRETERVVREALE
1907	0	YLSADSGDADDSDADLGSAVKQLQEFIPNIKDRATSTIKRM
1908	0	KMFDVNNYKGRYSEGDTEKLKMYHSLLGNDWKTIGEMVARS
1909	0	ITRRKKRKKDFQHLISSPLKKSRICDETANATSTLKKRKKR
1910	0	ISWVEVEAKVQTRNWMQCKSKWTEILTKRMTNGRRIYYGMN
1911	0	KERFKQFEGLVDDCEYKRGIKETTCTDLDGFWDMVSFQIED
1912	0	CTDLDGFWDMVSFQIEDVIHKFNNLIKLEESGWQVNNNMNH
1913	0	MNHNMNKNVFRKKVVSGIASKPKQDDAGRIAARNRLAAIKN
1914	0	PSKPVVGIIYPPPEVRNIVDKTASFVARNGPEFEARIRQNE
1915	0	DPLGGACAGGRTWSPTACGGKKLLNKCAASAAEESGAGKKD
1916	0	PPFDSVPEVIHYYTTRKLPIKGAEHLSLLYPVAVRTLXXXX
1917	0	PAERGAGEARLEEAVNRWVLKFYFHEALRAFRGSRYGDFRQ
1918	0	FDMEAELTPLESAINVLEMIKTEFTLTEAVVESSRKLVKEA
1919	0	ANCPFYSKTGACRFGDRCSRKHNFPTSSPTLLIKSMFTTFG
1920	0	SAGDVEKARVLKEEGNELVKKGNHKKAIEKYSESLLCSNLE
1921	0	LRSLETYERLEADKKKQVHKKRKCPGPIITYHSVTVPLVGE
1922	0	PVTDIPYATARAFKIIREAYKKYITAHGLPPTASALGPGPP
1923	0	QQLPGALPPECTPNIDGPNAKSVQREQSLHSFHTLFCRRCF
1924	0	PRKKKRKHRLWAAHCRKIQLKKDGSSNHVYNYQPCDHPRQP
1925	0	PDLCLTCGAADHWDSKNVSCKNCSIQRGSKKHLLLAPSDVA
1926	0	KYMCSFLFNLNNDFVVDATRKGNKIRFANHSVNPNCYAKVM
1927	0	DSLALANNSTLTIGTIDEIQKLHIRTVPLYESPRKICYQEV
1928	0	PEGGPLLDTRKNVQATEGRTKAPARLCAGENASTPSEPEKF
1929	0	VATGKKRKRPHVFESNPSIRKRQQTRLLRKLRATLDEYTTR
1930	0	PNPVFKVFGAAPLENVVRKYKSMILEDLESALAEHAPAPQE
1931	0	EKWSVHIAMHPQVNIYSVTRKRYAHLSARPADEIAVDRDVP
1932	0	SPSPKTSLSAPPNSSSTENPKTVAKCQVTPRRNVLQKRPVI
1933	0	TGKKLCESDVCQSSSLTGHKKVLSREKGHQCHECGKAFQRS
1934	0	KKEGLRVVREDHYSTWEQGFKLQGNSKGLGQEPLCKQFRQL
1935	0	SEEKPEKGFECVFCNFVCKTKNMFERHLQIHLITRMFECDV
1936	0	CGFETELNVQFVSHMSLHVDKEQWMFSICCTACDFVTMEEA
1937	0	EGDALPGHSKPSRSMESSPRKGSKKKPVKVEAPEYIPISDD
1938	0	LISREDVEALYTSCKTERVLKTKRRRVGRALATKAPPPERA
1939	0	AGAGGPGSLSYRCKRKRGGAKDCLLAPHAGARRLLLLPRSY
1940	0	NTIAARFLNNDSSGAEANSEKYSKILHCPEFATDLPSSQTD
1941	0	CDLEELRKLKAINSIAFHAAKCTLISREDVEALYTSCKTER
1942	0	RTLVLGKRPVLQTPPVKPNLKSARSPRPTGKTETNEGTLDD
1943	0	AVSVKIEEENQDLMHFNLQKKRAKGKGQVKEEDNSNQKQLK
1944	0	GLVQPHNVPSIVHSQVYRSSKVEKLPPLYKTLTFSGSSQTV
1945	0	PPSITHSPQNELKGTNHSNEKKNTPAAQKNKVKQDSESPKS
1946	0	EGKYMQGLKEMKDSLAEVEEKYKKAMVSNAQLDNEKTNFMY
1947	0	TDFCVEDYIRCKDTGFHAAEKRRKKRKEWVPTITVPEPFQM
1948	0	REQKKKEESMKSKSDIEMVHKALKKQEEDPEYKKKFRANPV
1949	0	LEEREEKLKKRPLLFERVAQKNARMAAEKHYSNTLKALGIS
1950	0	PPPPMSALVPDTPPDTPPAMKNATSSKQLPLEPESPSGQVG
1951	0	PTDAAVLTSPPAPAPPVTPSKPMAGTTDREEATRLLAEKRR
1952	0	EIMKRTRKSEVSETKQKQDSKEANANGSSPEPVKAVEARSP
1953	0	RSRPNSGDEKRKLSLSEGKVKKNMGEGKKRVSSGSSERGSK
1954	0	YSSEQNGAKIVATKEWKRNDKIELLVGCIAELSEIEENMLL
1955	0	CAQLWLGPAAFINHDCRPNCKFVSTGRDTACVKALRDIEPG
1956	0	PASSNSTSSKLTHINNSRVPKKLKKPAKPLLSKIKLRNHCK
1957	0	KKKKKRDRVEASSLPEVRTGKRKRSSSEDAESLAPRSKVKK
1958	0	ILVDRQAKLNQPREKKRGTEKLITKAEKIRLAKTQQASKHI
1959	0	NHIPEEESSSSSSDEDEDDRKQIDELLGKVVCVDYISLDKK
1960	0	QIDELLGKVVCVDYISLDKKKALWFPALVVCPDCSDEIAVK
1961	0	DIEVLSEDTDYEEDEVTKKRKDVKKDTTDKSSKPQIKRGKR
1962	0	GDTSLRIYKWVPVTEPKVDDKNKNKKKGKDEKCGSEVTTPE
1963	0	NEDQRRHIEIRDQALSNAQAKVVKLEEELKKKQVYVDKVEK
1964	0	VSPVNVHINTRTSAPSPTALKLATVAASMDRVPKVTPSSAI
1965	0	EAESNVNYYNRLYKGEFKQPKQFIHIQPFNLDNEQPDYDMD
1966	0	TYVLKPTFTKQQIANLDKQAKLSRAYDGTTYLPGIVGLNNI
1967	0	LSRAYDGTTYLPGIVGLNNIKANDYANAVLQALSNVPPLRN
1968	0	YLETELEDPFAFNEEDDDLKKGATVRKKLQSKLAQNRQRQR
1969	0	EDPFAFNEEDDDLKKGATVRKKLQSKLAQNRQRQRETEILK
1970	0	LLPSSRAPTVDPPRTDRILMKATAFSPHFSCISRLQRLVKL
1971	0	LCKQRRLNGYAFCIRHVLEDKTAPFKQCEYVAKYNSQRCTN
1972	0	VQHQQQRKPRKKTKPPALTKKHKKKRRRGPRRPQKPIPPAV
1973	0	RCVFITDDFRDTMPKNLNFVKGVVDSGGLSLNVSCETLQQH
1974	0	TKTDPKNEEEEKRRIEARREKQRRRREKNSEKYGDGYRMAF
1975	0	TGEYLTEQEDEQRRKGRADLKARKQKTSSSQSLEHRLRNRN
1976	0	FLPNNLEEPACLENSEKPSGKRKCKTKHMATVSEEAKDVVL
1977	0	KPSGKRKCKTKHMATVSEEAKDVVLYCLQKDSEDVNHRDNA
1978	0	KSSSATASQPPESLPQPGLQKSVSNLQKPTQSISQENTNSV
1979	0	NLPSLKSENKGNDPNIVIVPKDGTGWANKQDQQDPKSSSAT
1980	0	FQNQMNQLKNKYQGQDEKLWKRSQTFLEKHLNSSHPRSQPA
1981	0	KNKYQGQDEKLWKRSQTFLEKHLNSSHPRSQPAILLLTAAR
1982	0	LWNDELQSRKKRKDPFSPDKKKPVVVSGPYIVYMLQDLDIL
1983	0	KDECPTSAVITTINHDEVWFKRPDGSKSKLYISQLQKGKYS
1984	0	NVDFECDTKLYTSAPNTSQGKDNSVLLVLSSDESQQSENSE
1985	0	HDENEDEFSDEEDFLNSTKAKLLKLTSSSIDPGLSIKQLGG
1986	0	INFNADKLQSNKRTLTQIKEKKKNELLQKAVITPDFEKNHC
1987	0	ARTTAESQTTGKQSLIPRTPKARKRKSRTTGSLPKGTEPST
1988	0	SSPRPKMDAILTEAIKACFQKSGASVVAIRKYIIHKYPSLE
1989	0	VSLGCLFIQHGLHSNIPCLSKLLYIALSWPITSASTENSFS
1990	0	NSFSTLPRLKTYLCNTMGQEKLTGPALMAVEQELVNKLMEP
1991	0	SHSSNTSFADELSHLLTLVSKFEFVFCLKFLYRVLSVTGIL
1992	0	AYSDSASLQIHLSAHAIKHAKAYCCSMCGRAYTSETYLMKH
1993	0	RLQQHVKVIIATPGRLLDIIKQSSVELCGVKIVVVDEADTM
1994	0	PQLLNSPYLHDQKRKEQQKDKQTQNDLVTGANLMDIIRKHD
1995	0	TSEDGQVFSPKKGQKKKSIEKKRKKSKGDSDISDEEAAQQS
1996	0	GPCCKALCFRRDSAIRKQLVKNEKGTIKQAYTSAPMVDNEL
1997	0	DRAHDENKKKAKIQKKPIKKKKEDDVGIERGNIETTSEDGQ
1998	0	DISVVKVEDSFEGERPGRRSKKIWLVPIDFDKLEIPQPDFE
[truncated: 697 more rows]
